# Supplementary material for: CMIP requirement in T Follicular helper cell highlights its role in the immunopathogenesis of Idiopathic Nephrotic Syndrome
Source: Research Square preprint supplement (doi:10.21203/rs.3.rs-2772264/v1), 2023-05-02
Supplement: Supplementary file 1 [file cac36fb6f8558411bb8445b0.xlsx]

## Sheet: Feuil1
	Project	MaOL
	Exp Name	MaOL 2016
	Link	2023-03-23
		ko_T0_90	ko_T0_91	ko_T0_92	ko_T0_93	ko_T1_90	ko_T1_91	ko_T1_92	ko_T1_93	wt_T0_46	wt_T0_52	wt_T0_53	wt_T1_46	wt_T1_52	wt_T1_53	C: Student's T-test Significant ko_T0_wt_T1	C: Student's T-test Significant wt_T0_ko_T1	C: Student's T-test Significant ko_T0_wt_T0	C: Student's T-test Significant ko_T1_wt_T1	C: Student's T-test significant	N: Peptides	N: Razor + unique peptides	N: Unique peptides	N: Sequence coverage [%]	N: Unique + razor sequence coverage [%]	N: Unique sequence coverage [%]	N: Mol. weight [kDa]	N: Q-value	N: Score	N: Intensity	N: MS/MS count	N: Two-way ANOVA p value WT KO	N: Two-way ANOVA p value stim	N: Two-way ANOVA p value Interaction	N: Student's T-test p-value ko_T0_wt_T1	N: Student's T-test Difference ko_T0_wt_T1	N: Student's T-test Test statistic ko_T0_wt_T1	N: Student's T-test p-value wt_T0_ko_T1	N: Student's T-test Difference wt_T0_ko_T1	N: Student's T-test Test statistic wt_T0_ko_T1	N: Student's T-test p-value ko_T0_wt_T0	N: Student's T-test Difference ko_T0_wt_T0	N: Student's T-test Test statistic ko_T0_wt_T0	N: Student's T-test p-value ko_T1_wt_T1	N: Student's T-test Difference ko_T1_wt_T1	N: Student's T-test Test statistic ko_T1_wt_T1	T: Protein IDs	T: Majority protein IDs	T: Protein names
		24.0678	23.928	23.4884	24.0786	24.2101	23.9072	23.4913	22.5962	23.1413	23.3251	23.0864	24.3283	22.2703	23.7078			+		ko_T0_wt_T0	4	4	4	NaN	NaN	NaN	NaN	0	NaN	407850000	99	0.254642	0.802745	0.40562	0.434149	0.455244	0.84996	0.421712	-0.366902	-0.874793	0.00985816	0.706395	4.04662	0.867166	0.115751	0.176046	O88890-2;O88890	O88890-2;O88890	SH2 domain-containing protein 1A
		23.4111	23.8794	23.1634	23.4196	22.472	22.1931	22.5073	22.8734	22.0387	21.425	22.5004	22.5551	22.9415	21.981			+		ko_T0_wt_T0	7	7	7	NaN	NaN	NaN	NaN	0	NaN	222500000	39	0.00549515	0.147396	0.006377	0.0207141	0.975808	3.33285	0.150562	-0.523451	-1.69646	0.00533043	1.48033	4.7014	0.949804	0.0189246	0.0661741	P06332;P06332-2	P06332	T-cell surface glycoprotein CD4
		24.6195	24.7321	24.6655	24.3977	24.922	25.0168	25.0284	25.107	25.0332	25.1163	24.9374	24.8889	25.0644	24.7596			+		ko_T0_wt_T0	6	6	6	NaN	NaN	NaN	NaN	0	NaN	932640000	140	0.0368402	0.0165993	0.00189825	0.0450773	-0.300593	-2.65642	0.873871	0.0104101	0.167058	0.0068288	-0.425263	-4.42989	0.243467	0.11426	1.32184	P16330-2;P16330	P16330-2;P16330	2,3-cyclic-nucleotide 3-phosphodiesterase
		24.4965	24.6855	24.8176	24.8096	24.3909	25.0687	24.383	23.8597	25.3681	25.0405	25.475	24.4094	24.2224	24.5681			+		ko_T0_wt_T0	2	2	2	NaN	NaN	NaN	NaN	0	NaN	754030000	33	0.122473	0.00859851	0.0956545	0.0558094	0.302351	2.48046	0.0390509	0.868948	2.77677	0.0084411	-0.592208	-4.20594	0.936317	0.0256106	0.0839983	P17665	P17665	Cytochrome c oxidase subunit 7C, mitochondrial
		20.7894	20.3931	20.5345	20.7202	18.7775	20.7171	20.8946	21.1471	21.1073	21.4586	21.3092	20.959	21.4437	21.071			+		ko_T0_wt_T0	4	4	4	NaN	NaN	NaN	NaN	0	NaN	47381000	12	0.0541897	0.585887	0.89384	0.0196804	-0.548639	-3.37971	0.220088	0.907667	1.40112	0.00408044	-0.682445	-5.00693	0.28975	-0.773862	-1.18366	P26011	P26011	Integrin beta-7
		19.8648	19.4611	19.9409	19.8863	19.926	19.4032	19.7034	19.108	19.0096	18.8613	19.2311	20.2393	20.0358	19.9095			+		ko_T0_wt_T0	1	1	1	NaN	NaN	NaN	NaN	0	NaN	23876000	14	0.427678	0.0553885	0.000914488	0.134581	-0.273243	-1.78353	0.0804372	-0.501156	-2.18663	0.00505088	0.754273	4.76191	0.0669752	-0.526361	-2.33283	P31041	P31041	T-cell-specific surface glycoprotein CD28
		21.4756	21.4215	21.6924	21.6505	21.9857	21.8866	21.8458	22.1983	22.185	21.9265	21.9726	21.6422	21.8823	22.0021			+		ko_T0_wt_T0	2	2	2	NaN	NaN	NaN	NaN	0	NaN	111420000	40	0.0716727	0.0778263	0.00424994	0.0621645	-0.282192	-2.3929	0.687003	0.0489302	0.427203	0.00602241	-0.468007	-4.56626	0.335595	0.136884	1.06496	P61967;Q7TN05;Q9DB50	P61967;Q7TN05;Q9DB50	AP-1 complex subunit sigma-1A;AP-1 complex subunit sigma-3;AP-1 complex subunit sigma-2
		26.5211	26.4904	27.0445	26.3463	26.1497	27.9228	27.7814	28.6583	27.7969	27.7321	27.4446	25.9304	27.1017	26.6963			+		ko_T0_wt_T0	6	6	6	NaN	NaN	NaN	NaN	0	NaN	5037900000	167	0.994176	0.735142	0.0148172	0.94546	0.024412	0.0719118	0.964259	0.0297829	0.0470975	0.00338575	-1.05729	-5.22857	0.187168	1.05192	1.52751	P63254	P63254	Cysteine-rich protein 1
		26.8034	26.6529	26.5515	26.7964	26.8965	26.2913	26.1813	25.8104	25.8979	26.1135	26.1971	26.9839	26.1197	26.4528			+		ko_T0_wt_T0	8	8	8	57	57	57	NaN	0	NaN	2806800000	325	0.277872	0.82653	0.0367859	0.449926	0.182251	0.819229	0.452736	-0.225369	-0.813841	0.00171508	0.631552	6.09938	0.539009	-0.223932	-0.659036	P63276	P63276	40S ribosomal protein S17
		22.1326	21.9503	20.9474	21.8124	21.6725	20.8786	20.8636	20.7736	19.8105	20.2434	20.1097	22.5537	21.7681	21.6728			+		ko_T0_wt_T0	2	2	2	NaN	NaN	NaN	NaN	0	NaN	87173000	26	0.167362	0.0815473	0.000259654	0.492855	-0.287522	-0.739469	0.0144113	-0.992575	-3.67213	0.00397796	1.65616	5.03673	0.0383977	-0.951105	-2.79104	P97493	P97493	Thioredoxin, mitochondrial
		26.2299	25.548	25.2676	25.1491	25.9819	25.3115	24.9247	24.5895	23.5926	24.3022	23.7127	25.7056	24.3383	25.2734			+		ko_T0_wt_T0	6	6	6	NaN	NaN	NaN	NaN	0	NaN	1236000000	108	0.0137755	0.286504	0.0239547	0.363027	0.442864	1.00043	0.0204394	-1.33273	-3.34504	0.00432555	1.6795	4.93907	0.851926	0.0960979	0.196541	P97822;P97822-2	P97822;P97822-2	Acidic leucine-rich nuclear phosphoprotein 32 family member E
		23.83	23.9857	24.0627	23.981	23.9215	24.4356	23.9506	24.3783	24.9147	24.7609	24.6907	24.09	24.6889	24.3278			+		ko_T0_wt_T0	4	4	4	2	2	2	NaN	NaN	NaN	550010000	18	0.00132105	0.601389	0.0221823	0.04947	-0.404035	-2.57937	0.0153188	0.61728	3.61382	0.00014749	-0.823931	-10.3122	0.405855	-0.197383	-0.907291	Q07113	Q07113	Cation-independent mannose-6-phosphate receptor
		20.3986	20.4731	19.7076	20.1058	20.6734	19.6153	19.9386	19.7605	18.7377	18.9223	19.4748	20.5887	20.1935	20.1337			+		ko_T0_wt_T0	1	1	1	NaN	NaN	NaN	NaN	NaN	NaN	30433000	19	0.0739993	0.055077	0.00573676	0.597307	-0.133991	-0.563691	0.0358465	-0.952024	-2.84946	0.00962903	1.12636	4.07052	0.354964	-0.308329	-1.01897	Q3UA37	Q3UA37	Glutamine-rich protein 1
		20.8694	20.243	20.2134	20.0992	20.7534	19.799	20.5226	20.4694	19.2813	19.5846	19.4874	20.1025	20.2256	20.6494			+		ko_T0_wt_T0	3	3	3	NaN	NaN	NaN	NaN	0	NaN	38458000	18	0.0215934	0.0497606	0.0386229	0.907331	0.0303628	0.122425	0.0142857	-0.934996	-3.68053	0.00903654	0.905135	4.13549	0.837933	0.0602247	0.215445	Q60591-4;Q60591-2;Q60591	Q60591-4;Q60591-2;Q60591	Nuclear factor of activated T-cells, cytoplasmic 2
		23.548	23.582	23.6556	23.5833	23.4315	23.18	23.4353	23.3826	23.0738	22.8765	23.296	22.8822	22.6139	23.318			+		ko_T0_wt_T0	6	6	6	NaN	NaN	NaN	NaN	0	NaN	319820000	73	0.00143256	0.0932233	0.679573	0.0130808	0.654204	3.76568	0.0771091	-0.275251	-2.2202	0.00461254	0.510121	4.8651	0.0737435	0.419334	2.25575	Q61003-2;Q61003-3;Q61003	Q61003-2;Q61003-3;Q61003	T-cell differentiation antigen CD6
		21.8868	22.032	21.9604	21.9939	22.1149	22.3034	22.5557	22.298	22.43	22.5863	22.2722	21.9163	22.2996	22.3976			+		ko_T0_wt_T0	5	5	5	NaN	NaN	NaN	NaN	0	NaN	151840000	41	0.087255	0.281153	0.0106361	0.124615	-0.236233	-1.84332	0.434389	0.111495	0.849487	0.00276026	-0.461223	-5.47935	0.517248	0.113496	0.696345	Q6A0A9	Q6A0A9	Constitutive coactivator of PPAR-gamma-like protein 1
		25.8883	25.904	26.0234	25.9557	25.782	26.0985	26.0388	26.646	26.3744	26.3553	26.3035	25.7896	26.4176	26.0167			+		ko_T0_wt_T0	22	22	17	NaN	NaN	NaN	NaN	0	NaN	2169100000	409	0.238727	0.987017	0.110321	0.441677	-0.131774	-0.835192	0.389695	0.203076	0.94146	0.000171069	-0.401536	-9.99852	0.810784	0.0666858	0.252394	Q6PDG5-2;Q6PDG5	Q6PDG5-2;Q6PDG5	SWI/SNF complex subunit SMARCC2
		22.8907	22.6586	22.8257	22.6033	22.9175	22.1577	22.3748	22.4106	21.7313	21.5709	21.9016	22.605	21.3422	22.6581			+		ko_T0_wt_T0	3	3	3	NaN	NaN	NaN	NaN	0	NaN	159680000	29	0.0130289	0.850185	0.107648	0.200897	0.542819	1.47239	0.016556	-0.730526	-3.54037	0.000295499	1.00997	8.91632	0.546097	0.263378	0.647101	Q8BFY6	Q8BFY6	Peflin
		22.8646	23.0931	23.2691	22.9422	22.83	23.1867	22.5546	23.5049	23.5186	23.6996	23.7329	23.3024	23.2936	23.5763			+		ko_T0_wt_T0	3	3	3	NaN	NaN	NaN	NaN	0	NaN	279660000	38	0.0061783	0.395845	0.424124	0.0449555	-0.348529	-2.65867	0.0538281	0.631341	2.51	0.00379464	-0.608116	-5.09234	0.20809	-0.371754	-1.44495	Q8BX10-2;Q8BX10	Q8BX10-2;Q8BX10	Serine/threonine-protein phosphatase PGAM5, mitochondrial
		25.5461	25.5007	25.4935	25.5271	25.403	25.5352	25.4827	25.7017	25.7387	25.6631	25.6312	25.5175	26.2928	25.8619			+		ko_T0_wt_T0	16	16	16	NaN	NaN	NaN	NaN	0	NaN	1528900000	240	0.0288475	0.349647	0.352399	0.103711	-0.373847	-1.98651	0.123123	0.147044	1.85269	0.00316309	-0.160843	-5.31112	0.134754	-0.360049	-1.78254	Q8C129	Q8C129	Leucyl-cystinyl aminopeptidase
		21.7935	21.3926	22.1797	22.4916	21.8753	22.0338	22.7551	21.6337	22.9451	23.3077	23.2648	22.5733	23.2925	22.9542			+		ko_T0_wt_T0	5	5	5	NaN	NaN	NaN	NaN	0	NaN	158510000	42	0.000930845	0.871623	0.461514	0.0319849	-0.975666	-2.94731	0.0148081	1.09806	3.64613	0.00972521	-1.20821	-4.06041	0.0488822	-0.865514	-2.58923	Q8K2I4	Q8K2I4	Beta-mannosidase
		22.8236	22.8096	22.6577	22.6575	22.6098	22.4708	22.4185	23.2617	22.3992	22.2303	22.1849	22.2934	22.6505	22.4528			+		ko_T0_wt_T0	4	4	4	NaN	NaN	NaN	NaN	0	NaN	179120000	51	0.0232214	0.668008	0.372026	0.044949	0.27152	2.65879	0.137234	-0.41871	-1.76838	0.00178777	0.46561	6.0432	0.403218	0.22462	0.912793	Q8R1G6	Q8R1G6	PDZ and LIM domain protein 2
		22.0576	22.2793	22.3187	22.0297	21.8947	21.4047	21.7746	22.9341	21.6147	21.6362	21.4225	21.632	22.2838	21.6094			+		ko_T0_wt_T0	3	3	3	NaN	NaN	NaN	NaN	0	NaN	122820000	42	0.110699	0.911527	0.329548	0.168571	0.329608	1.60881	0.308393	-0.444236	-1.13355	0.00205696	0.613546	5.8564	0.724366	0.160298	0.373104	Q8VD62	Q8VD62	UPF0696 protein C11orf68 homolog
		27.4284	27.2255	27.4558	27.3573	27.5899	27.8176	27.2486	27.8469	27.8065	27.6478	27.6872	27.4317	27.5407	27.5845			+		ko_T0_wt_T0	16	16	16	NaN	NaN	NaN	NaN	0	NaN	5895200000	319	0.218479	0.492626	0.0325225	0.0874211	-0.152231	-2.12076	0.623182	0.0880775	0.523204	0.00502627	-0.347117	-4.76742	0.552659	0.106808	0.636142	Q91VM5;Q9WV02;Q9WV02-2;Q8C796	Q91VM5;Q9WV02;Q9WV02-2	RNA binding motif protein, X-linked-like-1;RNA-binding motif protein, X chromosome;RNA-binding motif protein, X chromosome, N-terminally processed
		22.931	22.9998	23.2774	23.0603	22.7561	23.7473	23.3964	23.1753	23.6059	23.7599	23.5934	22.6884	22.5284	23.2386			+		ko_T0_wt_T0	4	4	4	NaN	NaN	NaN	NaN	0	NaN	283960000	36	0.680787	0.157009	0.00893097	0.270117	0.248654	1.23964	0.18429	0.384322	1.53956	0.00198863	-0.585961	-5.90097	0.199193	0.450292	1.47903	Q91WK2	Q91WK2	Eukaryotic translation initiation factor 3 subunit H
		25.4439	25.0599	24.9797	25.039	25.2843	24.832	24.9414	25.4166	24.2926	24.5993	24.6268	25.0167	24.8142	24.9528			+		ko_T0_wt_T0	10	10	6	NaN	NaN	NaN	NaN	0	NaN	1030700000	126	0.00535687	0.158117	0.0889591	0.192907	0.202727	1.50401	0.0219447	-0.612318	-3.2804	0.00976889	0.62439	4.05585	0.316092	0.190655	1.11362	Q9QXY6	Q9QXY6	EH domain-containing protein 3
		27.4186	27.5813	27.5809	27.706	27.2354	27.5449	27.5767	27.3449	27.1196	27.2058	26.9591	26.8729	27.2754	27.044	+		+		ko_T0_wt_T0;ko_T0_wt_T1	16	16	5	NaN	NaN	NaN	NaN	0	NaN	4992600000	395	0.000485091	0.264473	0.50098	0.00822606	0.507583	4.23281	0.0336119	-0.330616	-2.90456	0.00356315	0.476817	5.16722	0.0463008	0.361383	2.63416	P01901;P14428;P03991	P01901	H-2 class I histocompatibility antigen, K-B alpha chain
		21.139	20.757	20.4193	20.816	20.3524	20.0238	19.7704	20.3214	19.9445	19.7112	19.0852	20.0731	19.9634	19.7932	+		+		ko_T0_wt_T0;ko_T0_wt_T1	2	2	2	NaN	NaN	NaN	NaN	0	NaN	35764000	16	0.00183599	0.195823	0.0105519	0.00649953	0.839579	4.48319	0.102703	-0.536709	-1.99416	0.00737492	1.20254	4.34774	0.369083	0.173749	0.986738	P52432	P52432	DNA-directed RNA polymerases I and III subunit RPAC1
		22.9041	23.0961	23.0799	22.844	23.4335	23.6604	23.3851	23.826	23.5398	23.4723	23.3331	23.9325	23.9675	23.7107	+		+		ko_T0_wt_T0;ko_T0_wt_T1	5	5	5	NaN	NaN	NaN	NaN	0	NaN	357710000	63	0.000984129	8.28801e-05	0.319827	0.000305882	-0.889222	-8.85166	0.376155	-0.127844	-0.970975	0.00354332	-0.467372	-5.1739	0.0877192	-0.294006	-2.11808	Q91WM3	Q91WM3	U3 small nucleolar RNA-interacting protein 2
		24.9273	24.4661	24.6324	24.6947	24.7111	24.2223	25.1521	25.0888	25.4686	25.4699	25.1272	25.1469	25.3145	25.1112	+		+		ko_T0_wt_T0;ko_T0_wt_T1	10	10	10	NaN	NaN	NaN	NaN	0	NaN	964900000	110	0.00483107	0.970403	0.372789	0.00933995	-0.510768	-4.10163	0.0924227	0.561661	2.07692	0.0060229	-0.675106	-4.56617	0.184775	-0.397323	-1.53752	Q9JHI5	Q9JHI5	Isovaleryl-CoA dehydrogenase, mitochondrial
		24.673	24.6388	24.8457	24.9482	24.689	25.9025	25.0083	24.7011	25.245	25.6665	25.5858	25.1321	25.1476	25.3062	+		+		ko_T0_wt_T0;ko_T0_wt_T1	11	11	11	NaN	NaN	NaN	NaN	0	NaN	1133800000	70	0.0450122	0.82829	0.132541	0.00794391	-0.418846	-4.26932	0.285654	0.423843	1.19505	0.00339947	-0.722654	-5.22369	0.739172	-0.120036	-0.352022	Q9R0X4;Q32MW3	Q9R0X4;Q32MW3	Acyl-coenzyme A thioesterase 9, mitochondrial;Acyl-coenzyme A thioesterase 10, mitochondrial
		19.3745	18.7706	19.6786	20.177	19.5127	18.1346	19.84	18.6276	25.3742	25.2319	25.4012	25.704	25.982	25.6935	+	+	+	+	ko_T0_wt_T0;ko_T0_wt_T1;ko_T1_wt_T1;wt_T0_ko_T1	14	10	8	NaN	31	25	NaN	0	NaN	531330000	91	1.0871e-09	0.805932	0.145087	1.07542e-05	-6.293	-17.635	3.98602e-05	6.30705	13.5057	1.4328e-05	-5.83559	-16.6376	2.96898e-05	-6.76446	-14.3439	P01902;P14432	P01902	H-2 class I histocompatibility antigen, K-D alpha chain
		22.0338	22.3679	21.8958	21.784	22.3027	22.0369	22.4267	22.1572	22.6942	22.6123	22.7929	22.8956	23.3224	22.8453	+	+	+	+	ko_T0_wt_T0;ko_T0_wt_T1;ko_T1_wt_T1;wt_T0_ko_T1	3	3	3	NaN	NaN	NaN	NaN	0	NaN	173990000	41	6.54633e-05	0.0427597	0.63249	0.00376455	-1.0007	-5.10177	0.00786605	0.468926	4.27966	0.0073312	-0.679404	-4.35405	0.00451977	-0.790226	-4.88841	P03958	P03958	Adenosine deaminase
		22.7993	23.399	23.951	22.7728	23.3362	23.8355	23.7743	23.338	25.5559	25.3241	24.3701	24.7937	24.2161	24.9141		+	+	+	ko_T0_wt_T0;ko_T1_wt_T1;wt_T0_ko_T1	5	5	5	NaN	NaN	NaN	NaN	0	NaN	572410000	13	0.000190742	0.98434	0.156161	0.0134682	-1.41076	-3.73736	0.00699356	1.51239	4.40432	0.00916624	-1.85284	-4.12086	0.006796	-1.07031	-4.43506	P07091	P07091	Protein S100-A4
		25.2685	25.0559	25.1737	25.0621	25.2203	25.2036	25.1826	25.4746	24.7723	24.9343	24.7293	24.9006	24.9776	24.8346		+	+	+	ko_T0_wt_T0;ko_T1_wt_T1;wt_T0_ko_T1	11	11	11	NaN	NaN	NaN	NaN	0	NaN	1069400000	254	0.000162336	0.0810547	0.755835	0.019101	0.235769	3.40721	0.00509873	-0.458314	-4.75128	0.00911322	0.32807	4.12681	0.00889777	0.366013	4.15142	Q9CYG7;Q9CYG7-2	Q9CYG7;Q9CYG7-2	Mitochondrial import receptor subunit TOM34
		22.4761	23.1158	22.492	22.0639	22.8369	22.2589	23.1417	22.1819	21.0205	21.6725	21.0687	22.6998	22.0129	22.1634		+	+		ko_T0_wt_T0;wt_T0_ko_T1	7	7	7	NaN	NaN	NaN	NaN	0	NaN	171210000	38	0.00524896	0.0546336	0.0561406	0.465778	0.244889	0.789153	0.0088357	-1.35094	-4.15864	0.0091148	1.28303	4.12663	0.379053	0.312797	0.964588	O08808	O08808	Protein diaphanous homolog 1
		27.026	26.9764	26.8561	26.8124	26.9051	26.7615	26.9247	26.97	26.5876	26.4895	26.532	26.9597	26.549	26.7938		+	+		ko_T0_wt_T0;wt_T0_ko_T1	15	15	15	NaN	NaN	NaN	NaN	0	NaN	3595200000	441	0.00305088	0.223687	0.0746063	0.251993	0.150241	1.29468	0.00175761	-0.35393	-6.06617	0.00187959	0.38133	5.97596	0.327112	0.122841	1.08582	O55131;Q8C650-2;Q9DA97;Q8C650	O55131	Septin-7
		21.5715	19.5427	18.9069	19.5891	19.2574	16.9384	18.5144	18.8152	22.2833	23.3932	22.9622	21.3442	26.058	20.2209		+	+		ko_T0_wt_T0;wt_T0_ko_T1	19	17	17	NaN	NaN	NaN	NaN	0	NaN	171770000	38	0.00239651	0.273899	0.519267	0.169588	-2.63849	-1.60414	0.00100354	4.49824	6.86354	0.00982247	-2.97702	-4.0503	0.049288	-4.15971	-2.58241	P15508	P15508	Spectrin beta chain, erythrocytic
		24.8071	24.4872	24.4747	24.3507	24.5362	24.4486	24.6703	24.6784	23.7481	23.7224	24.1057	24.2522	24.4213	24.4943		+	+		ko_T0_wt_T0;wt_T0_ko_T1	11	11	11	NaN	NaN	NaN	NaN	0	NaN	701630000	73	0.000677278	0.0153642	0.0234534	0.328378	0.140657	1.08268	0.00197353	-0.724605	-5.91107	0.00747791	0.671176	4.33303	0.0809089	0.194087	2.182	Q60611;Q8VI24-2;Q8VI24	Q60611	DNA-binding protein SATB1
		21.8836	21.7715	22.3209	21.4587	21.6472	21.7292	21.1157	21.6699	20.0343	20.2358	20.8881	21.7658	21.4673	21.6945		+	+		ko_T0_wt_T0;wt_T0_ko_T1	5	5	5	NaN	NaN	NaN	NaN	0	NaN	100240000	39	0.00309044	0.0690033	0.00123423	0.379041	0.216163	0.964613	0.00835782	-1.1544	-4.21626	0.00454966	1.4726	4.88084	0.604644	-0.102034	-0.552108	Q61136	Q61136	Serine/threonine-protein kinase PRP4 homolog
		23.9069	23.8706	23.8481	24.1132	24.2227	24.0236	24.5382	24.9378	23.3977	23.5601	23.0414	24.2738	23.888	24.0692		+	+		ko_T0_wt_T0;wt_T0_ko_T1	4	4	4	36	36	36	NaN	0	NaN	538170000	35	0.00861564	0.00198291	0.417459	0.280847	-0.142272	-1.20861	0.00948571	-1.09753	-4.08581	0.0093995	0.601654	4.09513	0.222356	0.353606	1.39309	Q64339	Q64339	Ubiquitin-like protein ISG15
		21.8116	21.8329	21.6638	22.1532	22.0156	21.7859	22.056	22.4061	21.3228	21.303	21.4129	21.996	22.3064	22.2431		+	+		ko_T0_wt_T0;wt_T0_ko_T1	9	3	3	NaN	3	3	NaN	0	NaN	125870000	27	0.0861906	0.00112903	0.0134047	0.0814788	-0.316451	-2.17643	0.00548607	-0.719685	-4.66929	0.00892999	0.519169	4.1477	0.527805	-0.115936	-0.678116	Q6DIC0	Q6DIC0	Probable global transcription activator SNF2L2
		22.7041	22.5683	22.7436	22.4242	22.4589	22.4448	22.4908	22.9307	21.911	22.0214	21.8261	22.2793	21.88	22.5154		+	+		ko_T0_wt_T0;wt_T0_ko_T1	5	5	5	NaN	NaN	NaN	NaN	0	NaN	177940000	62	0.00104599	0.337718	0.176449	0.081815	0.385151	2.17317	0.00623536	-0.661821	-4.52827	0.000884958	0.690557	7.05386	0.146996	0.356415	1.71506	Q6P8X1	Q6P8X1	Sorting nexin-6;Sorting nexin-6, N-terminally processed
		20.762	19.8621	20.1607	19.5452	20.2351	19.6425	19.9116	19.64	18.7363	18.6207	17.6822	20.1523	18.3327	20.1597		+	+		ko_T0_wt_T0;wt_T0_ko_T1	1	1	1	11	11	11	NaN	NaN	NaN	20403000	13	0.012878	0.275653	0.0612777	0.409409	0.534292	0.899921	0.00561629	-1.51088	-4.64323	0.00859505	1.73608	4.18719	0.588629	0.309094	0.577502	Q9D1H8	Q9D1H8	39S ribosomal protein L53, mitochondrial
		25.6404	25.6742	25.58	25.57	25.7781	25.5481	25.6513	25.6754	25.2686	25.2652	25.0341	25.3321	25.6076	25.6339		+	+		ko_T0_wt_T0;wt_T0_ko_T1	10	10	10	NaN	NaN	NaN	NaN	0	NaN	1477500000	275	0.000891569	0.0175233	0.0388943	0.334925	0.0916499	1.06659	0.0026425	-0.473926	-5.53404	0.0018594	0.426895	5.99041	0.216902	0.138681	1.41253	Q9Z0M6-2;Q9Z0M6-3;Q9Z0M6	Q9Z0M6-2;Q9Z0M6-3;Q9Z0M6	CD97 antigen
		18.4063	18.9432	19.1274	18.4846	20.704	20.6375	20.649	18.8182	20.3738	19.1394	19.4233	21.0614	19.7548	20.6494	+				ko_T0_wt_T1	2	2	2	11	11	11	NaN	0	NaN	27169000	12	0.136897	0.00826165	0.420609	0.00606243	-1.74816	-4.559	0.41677	-0.556644	-0.884816	0.0604708	-0.905147	-2.41525	0.670567	-0.286369	-0.451457	B8ZXI1-2;B8ZXI1	B8ZXI1-2;B8ZXI1	Queuine tRNA-ribosyltransferase subunit QTRTD1
		18.1519	18.3253	19.1571	19.0339	19.8656	19.4981	19.9951	20.7673	19.1393	17.9967	19.5456	19.8642	20.5593	20.0411	+				ko_T0_wt_T1	2	2	2	NaN	NaN	NaN	NaN	0	NaN	20632000	15	0.577057	0.00135267	0.868157	0.0075886	-1.48781	-4.31749	0.0720512	-1.13766	-2.27429	1	0	0	0.746345	-0.123348	-0.341875	O88512	O88512	AP-1 complex subunit gamma-like 2
		18.6056	20.2135	18.6532	18.4208	22.0702	18.4056	21.871	21.1355	20.1627	17.6295	19.0081	21.2822	22.0347	22.0275	+				ko_T0_wt_T1	2	2	2	NaN	NaN	NaN	NaN	0	NaN	51474000	10	0.514747	0.00475986	0.477978	0.00333359	-2.8082	-5.24732	0.159693	-1.93714	-1.65079	1	0	0	0.413788	-0.910888	-0.890911	O88627	O88627	Sodium/nucleoside cotransporter 2
		21.0331	21.1597	20.8451	20.6432	19.5288	18.2923	18.6013	19.4461	20.9243	20.2791	19.0911	20.1665	19.9836	19.6359	+				ko_T0_wt_T1	4	4	4	NaN	NaN	NaN	NaN	NaN	NaN	27174000	5	0.823077	0.0027071	0.0148625	0.00314012	0.991616	5.32002	0.107732	1.13102	1.95678	0.139703	0.822126	1.75454	1	0	0	P58501;P58501-2	P58501	PAX3- and PAX7-binding protein 1
		23.6302	23.9833	23.7995	24.1104	24.7644	24.5631	24.2689	25.1939	24.2457	23.7739	24.0863	24.5734	25.0391	25.0705	+				ko_T0_wt_T1	5	5	5	NaN	NaN	NaN	NaN	0	NaN	811910000	98	0.292167	0.000328255	0.896107	0.00264471	-1.01351	-5.53298	0.0498642	-0.662219	-2.57282	0.405207	-0.154488	-0.90864	0.493045	-0.196802	-0.739128	P62075	P62075	Mitochondrial import inner membrane translocase subunit Tim13
		24.0991	24.2679	24.1005	24.2829	24.4414	24.3493	24.6714	24.3314	24.4694	24.318	24.4728	24.5599	24.5901	24.9115	+				ko_T0_wt_T1	3	3	3	NaN	NaN	NaN	NaN	0	NaN	677330000	43	0.0109187	0.00551773	0.967552	0.00656157	-0.499567	-4.47291	0.792238	-0.0283044	-0.277867	0.0252816	-0.232479	-3.15341	0.130168	-0.238784	-1.80943	P62482	P62482	Voltage-gated potassium channel subunit beta-2
		22.79	22.8622	23.1923	22.735	23.3944	23.3561	23.414	23.5808	22.8084	23.2173	23.3691	23.8404	23.6881	23.397	+				ko_T0_wt_T1	3	3	3	NaN	NaN	NaN	NaN	0	NaN	312130000	61	0.0752346	0.000734211	0.891292	0.00592636	-0.746931	-4.58391	0.101108	-0.304743	-2.00641	0.257505	-0.236709	-1.27756	0.157467	-0.20548	-1.66168	P62627	P62627	Dynein light chain roadblock-type 1
		19.8863	20.1407	19.8678	20.2761	19.2614	20.1011	19.6516	17.2987	19.1109	19.5329	19.7396	20.5491	20.4704	20.6232	+				ko_T0_wt_T1	1	1	1	NaN	NaN	NaN	NaN	0	NaN	22787000	10	0.268029	0.823976	0.0219558	0.00947685	-0.504872	-4.08676	0.629945	0.382961	0.512784	0.0304834	0.581562	2.98897	0.100823	-1.46939	-2.00863	Q3TAS6-2;Q3TAS6	Q3TAS6-2;Q3TAS6	ER membrane protein complex subunit 10
		30.0748	30.0948	29.9119	29.7096	30.1025	29.8866	29.8528	30.3635	29.6059	29.5414	29.6291	29.4404	29.3664	29.5841	+				ko_T0_wt_T1	53	53	32	NaN	NaN	NaN	NaN	0	NaN	29638000000	2468	0.000451029	0.964963	0.236431	0.00947886	0.484145	4.08654	0.0226025	-0.459202	-3.25372	0.0216255	0.355626	3.29368	0.0110036	0.587721	3.93602	Q7TPR4;O88990	Q7TPR4	Alpha-actinin-1
		20.3699	20.0255	20.2621	20.246	20.5447	20.1797	20.8287	21.2215	20.7332	20.5219	19.987	20.8059	20.523	20.7012	+				ko_T0_wt_T1	7	7	7	NaN	NaN	NaN	NaN	0	NaN	44429000	25	0.624051	0.0467923	0.558128	0.00933566	-0.450814	-4.1021	0.422526	-0.279613	-0.873149	0.399763	-0.188158	-0.920042	0.952327	0.016956	0.0628416	Q80U28-14;Q80U28-13;Q80U28-12;Q80U28-11;Q80U28-10;Q80U28-9;Q80U28-8;Q80U28-7;Q80U28-6;Q80U28-5;Q80U28-4;Q80U28-3;Q80U28-2;Q80U28-15;Q80U28	Q80U28-14;Q80U28-13;Q80U28-12;Q80U28-11;Q80U28-10;Q80U28-9;Q80U28-8;Q80U28-7;Q80U28-6;Q80U28-5;Q80U28-4;Q80U28-3;Q80U28-2;Q80U28-15;Q80U28	MAP kinase-activating death domain protein
		20.5933	20.9826	20.655	20.5032	21.1211	20.8882	21.0391	21.1061	18.9346	18.6145	20.3467	21.4541	21.116	21.4818	+				ko_T0_wt_T1	3	3	3	10	10	10	NaN	0	NaN	53914000	14	0.0480737	0.000996296	0.00517569	0.00830025	-0.667131	-4.22345	0.0117622	-1.74007	-3.86983	0.0301904	1.38495	2.99737	0.0442721	-0.31201	-2.67144	Q8BFV2	Q8BFV2	PCI domain-containing protein 2
		22.3263	21.8699	23.5546	21.7766	22.2426	23.765	22.4179	19.8494	23.3286	23.736	23.8669	19.2216	19.26	17.9725	+				ko_T0_wt_T1	21	3	3	NaN	NaN	NaN	NaN	0	NaN	169990000	12	0.112428	0.00262736	0.00273432	0.0019234	3.5638	5.94523	0.166357	1.57513	1.61907	0.0537429	-1.26199	-2.5113	0.0248868	3.25066	3.16742	Q8BG05-2	Q8BG05-2	Heterogeneous nuclear ribonucleoprotein A3
		18.7249	18.7319	18.6017	18.7828	19.0564	18.2512	18.9818	19.1539	19.4466	18.6422	18.9248	19.0185	18.9022	19.0883	+				ko_T0_wt_T1	1	1	1	NaN	NaN	NaN	NaN	NaN	NaN	9756700	1	0.202834	0.602	0.645167	0.00609299	-0.292686	-4.5535	0.666065	0.143726	0.458154	0.205625	-0.294218	-1.45425	0.591537	-0.142194	-0.572861	Q8VCR7	Q8VCR7	Alpha/beta hydrolase domain-containing protein 14B
		18.4088	19.9224	18.798	20.3052	21.6003	21.6966	21.6507	22.1511	19.6247	20.4219	21.9392	21.7534	22.2957	21.6257	+				ko_T0_wt_T1	2	2	2	NaN	NaN	NaN	NaN	NaN	NaN	73399000	9	0.110578	0.000778714	0.174344	0.00624278	-2.53299	-4.52698	0.11675	-1.11274	-1.89406	0.154964	-1.30334	-1.67411	0.630358	-0.116911	-0.51215	Q8VDG5-2;Q8VDG5	Q8VDG5-2;Q8VDG5	Phosphopantothenate--cysteine ligase
		25.7302	25.5035	25.6845	25.8223	25.866	25.4437	25.7153	25.9527	25.9389	25.9657	25.7734	26.103	26.1695	25.9858	+				ko_T0_wt_T1	11	11	11	NaN	NaN	NaN	NaN	0	NaN	1836600000	231	0.00847993	0.190726	0.443597	0.00701914	-0.400946	-4.40042	0.342159	0.148234	1.04913	0.078042	-0.207537	-2.21064	0.057966	-0.341643	-2.44958	Q99LC5	Q99LC5	Electron transfer flavoprotein subunit alpha, mitochondrial
		23.7669	24.221	24.1828	23.6963	20.7064	23.8944	18.7743	19.8858	24.8066	25.5612	23.9793	18.5845	20.2818	18.6674	+				ko_T0_wt_T1	1	1	1	NaN	NaN	NaN	NaN	0	NaN	297150000	18	0.581438	0.000153455	0.119831	0.000190343	4.78883	9.77818	0.0328481	3.96713	2.92433	0.106587	-0.815611	-1.96512	0.289136	1.63731	1.18536	Q99LT0	Q99LT0	Protein dpy-30 homolog
		20.0912	20.3407	20.6329	20.1328	20.1911	20.1262	19.4293	20.4162	20.8494	19.2008	20.2974	18.1404	19.2161	18.0069	+				ko_T0_wt_T1	1	1	1	NaN	NaN	NaN	NaN	NaN	NaN	18626000	8	0.0137271	0.0150632	0.0396423	0.0033571	1.84491	5.23883	0.881024	0.0751751	0.157487	0.687936	0.183546	0.425836	0.0115008	1.58619	3.89208	Q9CWI3	Q9CWI3	BRCA2 and CDKN1A-interacting protein
		22.0224	21.7312	21.7161	21.4536	21.7159	22.1089	21.8601	23.2217	21.6801	21.4963	21.76	22.482	22.5173	22.4308	+				ko_T0_wt_T1	5	5	5	NaN	NaN	NaN	NaN	0	NaN	133790000	28	0.711121	0.0135781	0.455757	0.00303412	-0.745896	-5.36211	0.214844	-0.58117	-1.41999	0.599249	0.0853402	0.560616	0.563581	-0.250066	-0.618087	Q9CXG3	Q9CXG3	Peptidyl-prolyl cis-trans isomerase-like 4
		18.2595	19.49	19.3165	18.6466	22.4089	21.7579	22.3748	22.0266	19.1402	19.4422	22.2168	22.4375	22.0451	22.6578	+				ko_T0_wt_T1	2	2	2	NaN	NaN	NaN	NaN	0	NaN	97159000	6	0.116715	0.000125815	0.258368	0.000244075	-3.45195	-9.28212	0.0757052	-1.87566	-2.23482	0.19176	-1.33823	-1.50865	0.360092	-0.238056	-1.00714	Q9D0S9	Q9D0S9	Histidine triad nucleotide-binding protein 2, mitochondrial
		23.0982	23.0404	22.9885	22.93	22.8403	23.4439	23.214	23.1649	23.2605	23.2175	23.0382	23.3295	23.2304	23.2061	+				ko_T0_wt_T1	3	3	3	NaN	NaN	NaN	NaN	0	NaN	280420000	11	0.168035	0.168652	0.690288	0.00609905	-0.24106	-4.55241	0.9695	0.00634178	0.0401864	0.0770406	-0.157843	-2.2209	0.577753	-0.0895581	-0.59499	Q9D6N5	Q9D6N5	Dr1-associated corepressor
		21.4986	22.2057	21.9747	22.0345	22.6444	22.2269	22.6165	22.7971	18.9484	20.3408	22.3246	22.6571	22.688	22.7604	+				ko_T0_wt_T1	2	2	2	14	14	14	NaN	0	NaN	158380000	18	0.169811	0.0117908	0.104359	0.00790317	-0.773488	-4.27472	0.0583932	-2.03333	-2.44362	0.158337	1.39046	1.6574	0.411874	-0.130622	-0.894841	Q9D6Y7-3;Q9D6Y7-2;Q9D6Y7;Q9D6Y7-4	Q9D6Y7-3;Q9D6Y7-2;Q9D6Y7;Q9D6Y7-4	Mitochondrial peptide methionine sulfoxide reductase
		23.7268	25.6011	27.922	27.3311	18.4826	27.6079	18.7849	19.4887	24.9167	27.1446	28.0568	18.8921	20.368	18.8944	+				ko_T0_wt_T1	1	1	1	NaN	NaN	NaN	NaN	NaN	NaN	2285800000	10	0.705845	0.00204693	0.459812	0.0023626	6.76039	5.67638	0.0918973	5.61498	2.08141	0.697827	-0.560773	-0.41139	0.542895	1.70618	0.65248	Q9ER58	Q9ER58	Testican-2
		21.8744	21.8439	21.5904	22.099	22.1659	21.4935	22.4533	21.5167	22.5038	22.4638	21.2101	22.6132	23.4305	22.8231	+				ko_T0_wt_T1	3	3	3	NaN	NaN	NaN	NaN	0	NaN	151540000	11	0.0345862	0.132899	0.132652	0.00576167	-1.1037	-4.61495	0.751842	0.151889	0.334128	0.60515	-0.207344	-0.551312	0.0302291	-1.04825	-2.99625	Q9ET30	Q9ET30	Transmembrane 9 superfamily member 3
		25.0795	25.0746	24.9719	25.0288	25.4127	25.1896	24.9546	25.7133	24.6706	24.6533	25.0577	25.4515	25.3441	25.3052	+				ko_T0_wt_T1	6	6	6	NaN	NaN	NaN	NaN	0	NaN	1163000000	162	0.407096	0.00466952	0.22188	0.000933379	-0.328215	-6.9727	0.0639115	-0.523691	-2.37052	0.0851607	0.244863	2.14145	0.809957	-0.049386	-0.253525	Q9JII5-2;Q9JII5	Q9JII5-2;Q9JII5	DAZ-associated protein 1
		18.7168	18.6698	18.3538	18.8629	19.4187	18.9117	18.2729	19.102	19.9009	19.7568	18.3266	19.4682	19.6156	19.1437	+				ko_T0_wt_T1	1	1	1	NaN	NaN	NaN	NaN	0	NaN	9837700	7	0.0559963	0.485968	0.724741	0.00701294	-0.758351	-4.40136	0.465188	0.401757	0.790259	0.183627	-0.677266	-1.54236	0.178617	-0.482842	-1.56386	Q9QXB9	Q9QXB9	Developmentally-regulated GTP-binding protein 2
		19.715	19.1984	19.7546	19.7552	21.0483	20.6116	21.2545	20.7268	19.5811	20.2294	20.839	21.0873	21.8182	21.37	+				ko_T0_wt_T1	2	2	2	6	6	6	NaN	0	NaN	42209000	6	0.0242933	0.000130059	0.825989	0.000634772	-1.81937	-7.57844	0.104511	-0.693781	-1.98051	0.135929	-0.610716	-1.77579	0.0936487	-0.514871	-2.06656	Q9WUQ2	Q9WUQ2	Prolactin regulatory element-binding protein
		22.7539	22.8683	22.7905	22.9703	23.3987	23.1707	23.1306	23.1042	22.7756	22.2758	22.9387	23.3204	23.1272	23.3028	+				ko_T0_wt_T1	4	4	4	13	13	13	NaN	0	NaN	266940000	88	0.520657	0.000996161	0.274288	0.00325387	-0.404443	-5.27666	0.0334618	-0.53767	-2.9084	0.348147	0.182354	1.03491	0.62671	-0.0491281	-0.517762	Q9Z2E1;Q9Z2E1-2	Q9Z2E1;Q9Z2E1-2	Methyl-CpG-binding domain protein 2
		25.8287	25.6547	25.876	25.4882	25.8247	25.6534	25.7761	25.7787	25.2995	25.2053	24.838	25.1643	24.2463	24.7323	+	+		+	ko_T0_wt_T1;ko_T1_wt_T1;wt_T0_ko_T1	13	13	13	NaN	NaN	NaN	NaN	0	NaN	1431200000	170	0.000139744	0.312773	0.136369	0.00965882	0.997629	4.06738	0.00367592	-0.643985	-5.13005	0.0127177	0.597669	3.79312	0.00574302	1.04395	4.61854	Q9CQT1	Q9CQT1	Methylthioribose-1-phosphate isomerase
		19.0701	17.8889	17.6233	17.857	22.2442	22.1386	22.0045	22.3452	19.3479	20.0919	18.0541	22.1601	22.5977	21.8888	+	+			ko_T0_wt_T1;wt_T0_ko_T1	7	1	1	NaN	NaN	NaN	NaN	0	NaN	80913000	3	0.129808	5.79591e-07	0.151626	0.000195304	-4.10568	-9.72575	0.00188656	-3.01851	-5.97101	1	0	0	0.873392	-0.0323912	-0.167698	O35226-4;O35226	O35226-4;O35226	26S proteasome non-ATPase regulatory subunit 4
		25.6239	25.7546	25.8448	25.4402	25.7365	25.7726	25.7107	25.7608	25.664	25.7171	25.5039	25.1823	25.3955	25.4996				+	ko_T1_wt_T1	14	14	14	NaN	NaN	NaN	NaN	0	NaN	1580900000	218	0.0135458	0.340948	0.033612	0.0648522	0.306734	2.35874	0.0914991	-0.116819	-2.08483	0.761288	0.0375298	0.320868	0.00472897	0.386023	4.83661	O35601-2;O35601	O35601-2;O35601	FYN-binding protein
		29.8995	29.556	29.5357	30.6277	29.3778	29.7156	29.6653	29.6199	29.8471	29.8277	29.9463	30.2377	29.9904	30.0974				+	ko_T1_wt_T1	11	11	11	32	32	32	NaN	0	NaN	28078000000	251	0.164197	0.640865	0.121113	0.537047	-0.203771	-0.662358	0.0309485	0.279049	2.97582	0.922528	0.0310152	0.102255	0.00486667	-0.513835	-4.80395	O54734	O54734	Dolichyl-diphosphooligosaccharide--protein glycosyltransferase 48 kDa subunit
		23.645	22.9431	23.0526	22.7924	22.9711	23.1272	23.1234	23.4896	22.4376	22.9717	22.4897	22.2872	22.5914	22.6373				+	ko_T1_wt_T1	7	7	6	NaN	NaN	NaN	NaN	0	NaN	236190000	25	0.00387842	0.923427	0.535447	0.0531543	0.602995	2.52031	0.0369019	-0.544837	-2.82475	0.130227	0.4753	1.80908	0.00834078	0.672532	4.21838	O88958	O88958	Glucosamine-6-phosphate isomerase 1
		18.3772	21.5168	17.8374	19.0986	19.6482	18.3238	19.958	19.162	22.2483	19.7419	21.024	21.6984	22.3467	21.5455				+	ko_T1_wt_T1	10	3	2	NaN	NaN	NaN	NaN	0	NaN	53181000	12	0.00508423	0.519914	0.533013	0.0426072	-2.656	-2.70347	0.0657722	1.73171	2.3474	0.174345	-1.79721	-1.58267	0.00266372	-2.5905	-5.52397	P01900;P01895-2;P01895;P14427	P01900;P01895-2;P01895;P14427	H-2 class I histocompatibility antigen, D-D alpha chain;H-2 class I histocompatibility antigen, alpha chain;H-2 class I histocompatibility antigen, D-P alpha chain
		22.5471	21.7638	22.3872	23.4239	22.1082	21.9851	22.0836	21.4327	22.0103	22.281	22.6354	22.8888	22.7449	22.8537				+	ko_T1_wt_T1	3	3	3	NaN	NaN	NaN	NaN	0	NaN	172400000	45	0.166821	0.574186	0.0355762	0.495779	-0.298651	-0.734223	0.15289	0.406515	1.68456	0.630276	0.221567	0.512276	0.00470286	-0.926733	-4.84293	P14483;P06342;P01921;P06346;P06344;P06343;P06345	P14483;P06342;P01921;P06346;P06344;P06343	H-2 class II histocompatibility antigen, A beta chain;H-2 class II histocompatibility antigen, A-Q beta chain;H-2 class II histocompatibility antigen, A-D beta chain;H-2 class II histocompatibility antigen, A-F beta chain;H-2 class II histocompatibility antigen, A-U beta chain;H-2 class II histocompatibility antigen, A-K beta chain
		25.5364	25.3736	25.3721	26.1189	25.2434	25.3301	25.2831	25.2439	25.9505	25.353	25.6682	25.5218	25.9442	25.8976				+	ko_T1_wt_T1	2	2	2	NaN	NaN	NaN	NaN	0	NaN	1437400000	105	0.0684602	0.369398	0.133447	0.465437	-0.187619	-0.789793	0.0476923	0.382113	2.60961	0.831734	-0.0569692	-0.223849	0.00652238	-0.512763	-4.47939	P03930	P03930	ATP synthase protein 8
		17.6528	20.1366	20.4466	22.0013	19.2734	20.0795	20.2703	18.7306	20.5637	20.9216	21.0569	21.4149	21.4802	21.293				+	ko_T1_wt_T1	2	2	1	NaN	NaN	NaN	NaN	0	NaN	44354000	20	0.0481824	0.953764	0.397605	0.265216	-1.33672	-1.25418	0.0357696	1.25897	2.85129	0.49522	-0.7881	-0.735224	0.00818503	-1.80759	-4.23803	P04227;P14437;P14436;P14435;P23150;P04228;P01910	P04227;P14437;P14436;P14435;P23150;P04228;P01910	H-2 class II histocompatibility antigen, A-Q alpha chain;H-2 class II histocompatibility antigen, A-S alpha chain;H-2 class II histocompatibility antigen, A-R alpha chain;H-2 class II histocompatibility antigen, A-F alpha chain;H-2 class II histocompatibility antigen, I-E alpha chain;H-2 class II histocompatibility antigen, A-D alpha chain;H-2 class II histocompatibility antigen, A-K alpha chain
		30.316	30.4989	31.0026	30.0761	30.7611	30.6771	30.8065	30.9386	30.8238	30.4363	30.5609	30.3125	30.2724	30.2459				+	ko_T1_wt_T1	27	27	16	NaN	NaN	NaN	NaN	0	NaN	48996000000	1369	0.169273	0.74645	0.0309636	0.437696	0.196468	0.842979	0.162637	-0.188811	-1.63662	0.617832	-0.133603	-0.531494	0.000559109	0.518882	7.78748	P21107-2	P21107-2	Tropomyosin alpha-3 chain
		28.4982	29.3246	29.8202	28.3562	29.3577	29.8839	29.8255	29.7616	30.0314	29.9734	29.5762	29.0294	29.1887	28.8001				+	ko_T1_wt_T1	8	8	8	NaN	NaN	NaN	NaN	0	NaN	21740000000	556	0.736136	0.870403	0.00682928	0.988725	-0.00625563	-0.0148516	0.445271	0.153145	0.82821	0.100323	-0.860547	-2.01252	0.00905313	0.701146	4.13361	P26350	P26350	Prothymosin alpha;Prothymosin alpha, N-terminally processed;Thymosin alpha
		25.1472	25.2927	25.1905	24.9802	25.305	25.2871	25.4446	25.4723	25.2956	25.3664	25.3254	24.9462	24.9985	25.1032				+	ko_T1_wt_T1	15	15	15	NaN	NaN	NaN	NaN	0	NaN	1189700000	186	0.106436	0.911972	0.000423928	0.173405	0.136673	1.58686	0.448695	-0.0481555	-0.821596	0.0754618	-0.176479	-2.23739	0.00316886	0.361308	5.30889	P43404;P43404-3;P43404-2;P48025;Q8BZ25	P43404	Tyrosine-protein kinase ZAP-70
		22.5542	22.7568	22.9696	23.3835	23.1197	23.272	23.1541	23.3772	23.3983	22.9296	23.2221	23.784	23.9331	23.6218				+	ko_T1_wt_T1	5	5	5	NaN	NaN	NaN	NaN	0	NaN	303020000	57	0.010535	0.00696413	0.304385	0.0117263	-0.863584	-3.87286	0.737534	-0.0474094	-0.354346	0.314275	-0.267321	-1.11828	0.00303566	-0.548853	-5.36149	P59235	P59235	Nucleoporin Nup43
		24.9542	24.6977	24.3662	25.1512	24.7316	24.7239	24.9497	24.4585	24.8458	24.7789	25.2343	25.3013	25.24	25.2597				+	ko_T1_wt_T1	8	8	8	NaN	NaN	NaN	NaN	0	NaN	960270000	231	0.0217919	0.499563	0.167422	0.0649425	-0.474694	-2.35762	0.217475	0.237066	1.41047	0.521657	-0.160661	-0.688702	0.00585403	-0.551099	-4.59742	P97370	P97370	Sodium/potassium-transporting ATPase subunit beta-3
		24.7907	24.9711	25.5691	25.5734	25.2522	25.2753	24.9612	25.1625	25.0739	25.2022	25.7558	25.7439	25.9121	25.7354				+	ko_T1_wt_T1	6	6	6	NaN	NaN	NaN	NaN	0	NaN	1290100000	210	0.0368323	0.330734	0.129324	0.066803	-0.571046	-2.3349	0.394197	0.181153	0.931829	0.707719	-0.117872	-0.397041	0.0012709	-0.634327	-6.51764	P97821	P97821	Dipeptidyl peptidase 1;Dipeptidyl peptidase 1 exclusion domain chain;Dipeptidyl peptidase 1 heavy chain;Dipeptidyl peptidase 1 light chain
		17.8878	20.2781	19.0569	20.9427	19.7354	19.4942	19.1028	18.735	21.2821	23.0581	19.3101	21.4007	24.2661	22.0082				+	ko_T1_wt_T1	8	8	8	NaN	NaN	NaN	NaN	0	NaN	62516000	29	0.00610559	0.569018	0.286314	0.0385198	-3.01701	-2.78835	0.0933323	1.94989	2.06922	0.224086	-1.67538	-1.38702	0.00808892	-3.29152	-4.25037	Q02357-5;Q02357-2;Q02357;Q02357-3;Q02357-4;Q02357-6	Q02357-5;Q02357-2;Q02357;Q02357-3;Q02357-4;Q02357-6	Ankyrin-1
		21.6193	21.634	21.8498	22.4892	21.7493	21.8387	21.6656	21.9485	21.5552	21.9088	21.7394	22.3241	22.3458	22.1402				+	ko_T1_wt_T1	2	2	2	NaN	NaN	NaN	NaN	0	NaN	127330000	20	0.286139	0.224844	0.041862	0.193108	-0.371912	-1.5032	0.579579	-0.0660752	-0.59204	0.550811	0.163644	0.63922	0.00344784	-0.46948	-5.20668	Q05117	Q05117	Tartrate-resistant acid phosphatase type 5
		18.4164	20.7286	20.4079	20.7981	20.5111	20.6753	20.5736	20.6068	19.8617	20.5385	21.4237	21.1241	21.3749	21.0006				+	ko_T1_wt_T1	1	1	1	NaN	NaN	NaN	NaN	NaN	NaN	48754000	17	0.187122	0.198215	0.945081	0.169921	-1.07879	-1.60262	0.967579	0.016257	0.0427195	0.52757	-0.520213	-0.67852	0.00229732	-0.574832	-5.71244	Q149F5	Q149F5	Transmembrane protein 71
		24.6898	24.6693	25.1417	24.0808	24.8248	25.0281	24.9506	25.0917	25.1685	25.1671	24.76	24.4892	24.5598	24.5934				+	ko_T1_wt_T1	15	15	15	NaN	NaN	NaN	NaN	0	NaN	906410000	170	0.893629	0.892386	0.0188844	0.720447	0.0979411	0.378715	0.679394	0.0580859	0.438395	0.227935	-0.38648	-1.37367	0.00203924	0.426335	5.86779	Q3UZ39;Q3UZ39-3;Q3UZ39-2;Q91WK0-2;Q91WK0	Q3UZ39;Q3UZ39-3	Leucine-rich repeat flightless-interacting protein 1
		23.8029	23.8406	24.6229	23.858	24.4156	24.5068	24.48	24.5746	24.8479	24.4497	24.2198	24.1201	24.0897	24.2408				+	ko_T1_wt_T1	10	10	10	51	51	51	NaN	0	NaN	644540000	99	0.6564	0.444514	0.0165952	0.636511	-0.119127	-0.502728	0.944705	0.0115457	0.0729097	0.150413	-0.474683	-1.69723	0.00150894	0.344011	6.27532	Q3UZA1-2;Q3UZA1	Q3UZA1-2;Q3UZA1	CapZ-interacting protein
		23.6506	23.7284	23.9004	22.4911	23.5355	23.9586	23.771	23.7082	21.7292	23.5424	23.8249	23.2541	22.9702	23.1504				+	ko_T1_wt_T1	12	12	12	NaN	NaN	NaN	NaN	0	NaN	376620000	86	0.160997	0.543413	0.765838	0.448564	0.317745	0.821849	0.259222	-0.711185	-1.2723	0.565881	0.410459	0.614315	0.00421727	0.618471	4.96848	Q61164;A2APF3;A2APF3-2	Q61164	Transcriptional repressor CTCF
		24.4902	24.8605	24.6599	25.2915	24.6385	24.9139	24.7518	24.5968	24.472	24.7853	24.741	25.0931	25.2066	25.1503				+	ko_T1_wt_T1	5	5	5	NaN	NaN	NaN	NaN	0	NaN	936250000	180	0.289588	0.229965	0.0335442	0.176495	-0.324482	-1.57314	0.635185	-0.0591704	-0.504754	0.501536	0.159432	0.723955	0.00482856	-0.424743	-4.81288	Q62186	Q62186	Translocon-associated protein subunit delta
		25.516	25.733	25.4053	25.3092	25.8988	25.8912	25.9003	25.975	26.1549	26.0265	25.4985	25.5309	25.202	25.6047				+	ko_T1_wt_T1	6	6	6	NaN	NaN	NaN	NaN	0	NaN	1629300000	205	0.769665	0.656169	0.00315782	0.775382	0.0450255	0.301205	0.897411	-0.023008	-0.135622	0.0999138	-0.402431	-2.01572	0.00681485	0.470464	4.43208	Q6ZWM4	Q6ZWM4	U6 snRNA-associated Sm-like protein LSm8
		22.252	21.7208	21.9605	21.7236	22.2719	22.2308	22.1425	22.1823	21.355	21.8424	22.1816	21.8746	21.7526	21.9339				+	ko_T1_wt_T1	5	5	5	9	9	9	NaN	0	NaN	131730000	57	0.0935996	0.158188	0.386365	0.713041	0.0605164	0.38936	0.0975837	-0.413892	-2.03423	0.648039	0.12125	0.485211	0.00144673	0.353158	6.33405	Q8BGC0;Q8BGC0-2	Q8BGC0	HIV Tat-specific factor 1 homolog
		22.4726	22.822	21.9495	22.7995	22.6529	22.6985	22.6728	22.5634	22.3683	22.6184	22.4862	22.9118	22.9277	22.901				+	ko_T1_wt_T1	8	8	8	NaN	NaN	NaN	NaN	0	NaN	192310000	23	0.348288	0.0635508	0.279571	0.155399	-0.402631	-1.67193	0.075496	-0.155921	-2.23703	0.939051	0.0199509	0.0803824	0.000647025	-0.266661	-7.54737	Q8BZN6;Q8BZN6-2;Q8BZN6-3	Q8BZN6;Q8BZN6-2;Q8BZN6-3	Dedicator of cytokinesis protein 10
		23.9554	23.7022	23.6205	24.5525	24.1582	24.4803	24.3426	24.4919	25.2315	24.9156	24.5874	24.8579	24.7067	24.8988				+	ko_T1_wt_T1	3	3	3	NaN	NaN	NaN	NaN	0	NaN	686700000	85	0.0011228	0.233038	0.139235	0.0192791	-0.863466	-3.39866	0.0299118	0.543275	3.00544	0.0228018	-0.953835	-3.24581	0.00739333	-0.452906	-4.34509	Q8R5J9	Q8R5J9	PRA1 family protein 3
		22.2873	22.1246	22.1571	23.2472	22.6065	22.3826	22.5254	22.3558	22.1961	22.0005	22.3965	22.8192	22.7531	22.8433				+	ko_T1_wt_T1	2	2	2	NaN	NaN	NaN	NaN	NaN	NaN	179620000	15	0.814698	0.140003	0.109307	0.317538	-0.351164	-1.10993	0.0721624	-0.269847	-2.27305	0.472121	0.256329	0.777331	0.00599112	-0.337646	-4.57197	Q8VC65	Q8VC65	Nurim
		22.2688	21.0007	21.4832	22.7737	21.7991	21.753	21.6521	21.9823	21.6707	21.8125	21.5851	22.2811	22.2294	22.4505				+	ko_T1_wt_T1	2	2	2	NaN	NaN	NaN	NaN	NaN	NaN	115030000	8	0.507107	0.374202	0.16824	0.394984	-0.43876	-0.930154	0.327396	-0.107193	-1.08512	0.700539	0.192177	0.407446	0.003218	-0.523744	-5.29014	Q91V01	Q91V01	Lysophospholipid acyltransferase 5
		26.4787	26.2999	26.1601	27.0106	26.5595	26.4473	26.2599	26.6873	26.6057	26.6155	26.7332	26.8768	27.2175	27.1321				+	ko_T1_wt_T1	11	11	11	NaN	NaN	NaN	NaN	0	NaN	3001600000	322	0.016698	0.189579	0.137401	0.0552982	-0.588151	-2.48797	0.207178	0.163003	1.44838	0.494669	-0.164168	-0.736213	0.00787707	-0.586986	-4.27819	Q91V61-2;Q91V61	Q91V61-2;Q91V61	Sideroflexin-3
		25.0315	24.9221	24.8739	25.5337	24.8201	24.8664	24.7572	25.0921	25.2954	25.1742	25.2455	25.2941	25.3486	25.5487				+	ko_T1_wt_T1	11	11	11	NaN	NaN	NaN	NaN	0	NaN	1041000000	146	0.0106663	0.643579	0.114585	0.168145	-0.306878	-1.61077	0.0115381	0.354445	3.88887	0.451685	-0.148132	-0.815853	0.00507149	-0.513191	-4.75732	Q91WD5	Q91WD5	NADH dehydrogenase [ubiquinone] iron-sulfur protein 2, mitochondrial
		23.9173	24.0241	23.8616	24.3393	23.8749	23.7197	23.5792	23.4849	23.6885	24.1993	23.6544	24.4264	24.4934	24.1891				+	ko_T1_wt_T1	5	5	5	NaN	NaN	NaN	NaN	0	NaN	506730000	83	0.0499771	0.919411	0.00320555	0.0735954	-0.334094	-2.25735	0.353123	0.182687	1.02324	0.37687	0.188176	0.969397	0.00259687	-0.704957	-5.556	Q922Q8	Q922Q8	Leucine-rich repeat-containing protein 59
		25.2654	25.5321	26.1239	24.9415	25.6988	25.8129	25.8811	25.7837	25.6254	25.5177	25.6558	25.1415	25.3142	25.2169				+	ko_T1_wt_T1	18	18	18	NaN	NaN	NaN	NaN	0	NaN	1567800000	215	0.182806	0.862621	0.0434406	0.45628	0.24151	0.80708	0.0187606	-0.194482	-3.42382	0.6723	-0.133934	-0.448887	0.000240374	0.569926	9.31193	Q99MD9;Q99MD9-2	Q99MD9;Q99MD9-2	Nuclear autoantigenic sperm protein
		29.7452	30.138	30.0854	29.3004	30.0109	29.9779	29.892	30.3848	29.8486	29.9635	29.8508	29.3936	29.2969	29.5615				+	ko_T1_wt_T1	12	12	11	NaN	NaN	NaN	NaN	0	NaN	28985000000	595	0.0592918	0.669649	0.0245345	0.152856	0.399903	1.68473	0.236271	-0.178792	-1.34545	0.772491	-0.0703797	-0.305226	0.00641863	0.649075	4.49677	Q9CQI6	Q9CQI6	Coactosin-like protein
		27.0255	27.1097	27.1301	26.5605	27.3449	27.1543	27.0807	27.2817	27.0975	27.1746	26.98	26.8932	26.9063	26.9484				+	ko_T1_wt_T1	12	6	6	NaN	NaN	NaN	NaN	0	NaN	4284400000	270	0.363223	0.414801	0.0395	0.809221	0.0404797	0.254533	0.183719	-0.131407	-1.54198	0.475257	-0.127566	-0.771529	0.00894452	0.299453	4.14603	Q9CQV8-2;Q9CQV8	Q9CQV8-2;Q9CQV8	14-3-3 protein beta/alpha;14-3-3 protein beta/alpha, N-terminally processed
		26.4261	25.9656	25.7978	27.1403	26.3205	26.1989	26.171	26.3866	26.2709	26.1216	26.5232	26.7061	26.6462	26.8668				+	ko_T1_wt_T1	11	11	11	NaN	NaN	NaN	NaN	0	NaN	2639600000	250	0.267504	0.440427	0.216736	0.308701	-0.407255	-1.13274	0.766935	0.035999	0.312973	0.943975	0.0272272	0.0738738	0.00220022	-0.470481	-5.76836	Q9CR62	Q9CR62	Mitochondrial 2-oxoglutarate/malate carrier protein
		26.5958	26.9213	27.0439	26.3553	26.8158	26.8967	27.0487	27.0909	26.925	27.0539	27.0203	26.4671	26.4167	26.6193				+	ko_T1_wt_T1	14	14	14	NaN	NaN	NaN	NaN	0	NaN	3630000000	489	0.381688	0.457082	0.0056764	0.288237	0.227983	1.18785	0.675905	0.0367155	0.443548	0.209118	-0.270698	-1.4411	0.00396969	0.461965	5.03917	Q9DAR7	Q9DAR7	m7GpppX diphosphatase
		26.4198	26.271	26.3098	27.195	26.5385	26.5103	26.4479	26.5241	26.7878	26.5182	26.663	27.0504	26.9573	26.9638				+	ko_T1_wt_T1	14	14	14	NaN	NaN	NaN	NaN	0	NaN	3231100000	497	0.0513259	0.393411	0.188725	0.148605	-0.441599	-1.70661	0.0811025	0.151148	2.1801	0.702606	-0.107444	-0.404445	3.25242e-05	-0.485303	-14.0793	Q9DBG6	Q9DBG6	Dolichyl-diphosphooligosaccharide--protein glycosyltransferase subunit 2
		24.6853	24.5101	24.9048	25.1848	24.5323	24.4993	24.3779	24.6983	24.5926	24.8945	24.8678	24.944	25.1105	25.0507				+	ko_T1_wt_T1	7	7	7	NaN	NaN	NaN	NaN	0	NaN	878820000	199	0.0481822	0.56961	0.0266687	0.281246	-0.213782	-1.20747	0.0701012	0.258036	2.29624	0.856231	0.0362933	0.190741	0.00220659	-0.508111	-5.7646	Q9DCS9	Q9DCS9	NADH dehydrogenase [ubiquinone] 1 beta subcomplex subunit 10
		19.1343	19.2641	21.84	19.4968	21.3776	21.724	21.7453	21.968	20.5324	19.7043	21.3212	20.8623	21.1369	21.106				+	ko_T1_wt_T1	2	2	2	NaN	NaN	NaN	NaN	0	NaN	66735000	16	0.925493	0.0166008	0.178634	0.207255	-1.10126	-1.44809	0.0360472	-1.18441	-2.8447	0.52244	-0.585504	-0.687348	0.00899749	0.668652	4.13995	Q9ET26	Q9ET26	E3 ubiquitin-protein ligase RNF114
		22.4184	22.9746	22.8889	22.2197	22.7313	22.7892	22.7884	22.6615	23.3893	23.4936	22.4588	22.4576	22.2533	22.1623				+	ko_T1_wt_T1	3	3	3	NaN	NaN	NaN	NaN	0	NaN	229680000	37	0.920004	0.13894	0.0256646	0.202041	0.334324	1.46797	0.238555	0.3713	1.33789	0.22123	-0.488521	-1.39707	0.00260721	0.451545	5.55098	Q9JHS9	Q9JHS9	Spliceosome-associated protein CWC15 homolog
		25.8261	26.0303	26.0258	26.3703	25.8727	25.9767	25.9748	25.7843	26.3398	26.0161	26.1481	26.4437	26.2368	26.1565				+	ko_T1_wt_T1	22	22	22	NaN	NaN	NaN	NaN	0	NaN	2167400000	397	0.0228115	0.627294	0.160092	0.2137	-0.21587	-1.42417	0.0390347	0.265882	2.77712	0.528882	-0.104844	-0.67627	0.00860306	-0.376908	-4.18623	Q9JKR6	Q9JKR6	Hypoxia up-regulated protein 1
		24.3477	23.7276	23.8104	24.8996	23.765	23.7524	23.5438	23.6034	23.4931	23.8517	24.2034	24.044	24.2691	24.1183				+	ko_T1_wt_T1	5	5	5	23	23	23	NaN	0	NaN	500090000	93	0.734137	0.362335	0.0521624	0.878387	0.0525327	0.161012	0.363579	0.183254	0.999179	0.384811	0.346937	0.95201	0.00251145	-0.477658	-5.59836	Q9QYA2	Q9QYA2	Mitochondrial import receptor subunit TOM40 homolog
		26.4923	26.803	26.9781	26.5304	26.816	26.8033	26.8147	26.898	27.0076	26.9607	26.841	26.6199	26.4105	26.5229				+	ko_T1_wt_T1	9	9	9	NaN	NaN	NaN	NaN	0	NaN	3488100000	297	0.614771	0.201387	0.0049757	0.263956	0.18322	1.25796	0.0881293	0.103416	2.1144	0.159951	-0.23545	-1.64954	0.002619	0.315254	5.54529	Q9Z2U1	Q9Z2U1	Proteasome subunit alpha type-5
		19.3625	20.1871	18.31	23.4814	20.605	20.3978	19.6627	19.9332	22.8899	24.4056	22.3461	23.4962	22.696	21.911		+		+	ko_T1_wt_T1;wt_T0_ko_T1	4	4	4	NaN	NaN	NaN	NaN	0	NaN	125990000	42	0.00452292	0.668197	0.8307	0.146136	-2.36583	-1.71961	0.00311025	3.06421	5.33171	0.0981853	-2.87864	-2.02941	0.00260246	-2.55141	-5.55328	O55042-2;O55042	O55042-2;O55042	Alpha-synuclein
		21.9286	22.4828	21.952	22.6755	21.748	21.7831	21.8693	21.9132	22.3549	22.3303	22.1221	22.2246	22.2398	22.0808		+		+	ko_T1_wt_T1;wt_T0_ko_T1	3	3	3	19	19	19	NaN	0	NaN	143770000	25	0.161186	0.0377342	0.181844	0.745311	0.0779977	0.343336	0.00220949	0.440702	5.7629	0.969264	-0.00937859	-0.0404977	0.00229796	-0.353326	-5.71208	O88384	O88384	Vesicle transport through interaction with t-SNAREs homolog 1B
		24.8262	24.6914	24.3112	27.4269	24.7753	24.7288	25.0219	24.5835	27.0235	27.8322	26.9568	26.4997	26.3992	26.2575		+		+	ko_T1_wt_T1;wt_T0_ko_T1	8	8	8	NaN	NaN	NaN	NaN	0	NaN	1715800000	127	0.00239085	0.147946	0.70148	0.260783	-1.07152	-1.26755	0.000204751	2.49344	9.63017	0.0756826	-1.95688	-2.23506	4.64024e-05	-1.60808	-13.0918	P00920	P00920	Carbonic anhydrase 2
		31.5226	31.7623	32.1107	34.3219	31.7494	32.3553	32.2166	31.6895	34.6066	35.4189	34.2068	33.7266	34.5767	33.2135		+		+	ko_T1_wt_T1;wt_T0_ko_T1	10	10	8	NaN	NaN	NaN	NaN	0	NaN	327690000000	3216	0.000987145	0.187935	0.607865	0.150041	-1.40953	-1.69915	0.000600597	2.7414	7.66898	0.0364542	-2.31471	-2.83513	0.00509924	-1.83622	-4.75117	P01942;P06467	P01942	Hemoglobin subunit alpha
		31.7692	32.0743	31.9461	34.329	32.1562	32.6687	32.3125	32.293	34.3134	34.973	34.1025	34.2768	34.1342	33.4107		+		+	ko_T1_wt_T1;wt_T0_ko_T1	10	8	8	NaN	NaN	NaN	NaN	0	NaN	324010000000	4233	0.00123473	0.429118	0.666872	0.117918	-1.41088	-1.88631	0.000422567	2.10538	8.26653	0.0488435	-1.93333	-2.58989	0.00169843	-1.58293	-6.11264	P02088;P02089	P02088;P02089	Hemoglobin subunit beta-1;Hemoglobin subunit beta-2
		21.1433	21.4849	22.0075	25.4463	21.1604	22.7901	21.4475	21.8527	24.7193	26.1403	23.7861	25.0395	26.605	24.5406		+		+	ko_T1_wt_T1;wt_T0_ko_T1	10	10	10	NaN	NaN	NaN	NaN	0	NaN	584710000	89	0.00231481	0.804436	0.4246	0.0751995	-2.87451	-2.24016	0.00757112	3.06921	4.31993	0.130222	-2.36138	-1.8091	0.00305223	-3.58234	-5.3548	P04919-2;P04919	P04919-2;P04919	Band 3 anion transport protein
		23.0159	22.8751	23.1294	24.6072	22.9235	22.9488	23.5629	22.767	24.4502	25.3196	24.5313	24.2237	24.2886	24.3113		+		+	ko_T1_wt_T1;wt_T0_ko_T1	5	5	5	29	29	29	NaN	0	NaN	429590000	62	0.00109027	0.172522	0.816115	0.129153	-0.86764	-1.81551	0.00268589	1.71647	5.51356	0.0504914	-1.36015	-2.56253	0.00204659	-1.22397	-5.86305	P15327	P15327	Bisphosphoglycerate mutase
		26.1852	26.3161	26.5237	25.9362	26.6887	26.5579	26.6389	26.6373	26.3077	26.029	26.0501	26.4241	26.1435	26.3589		+		+	ko_T1_wt_T1;wt_T0_ko_T1	16	16	16	NaN	NaN	NaN	NaN	0	NaN	2669800000	401	0.0379443	0.00741169	0.272517	0.689791	-0.0685047	-0.423118	0.00164573	-0.501772	-6.15564	0.526478	0.111388	0.680394	0.00903178	0.32188	4.13604	P51125-2;P51125-6;P51125;P51125-7;P51125-3;P51125-5;P51125-4	P51125-2;P51125-6;P51125;P51125-7;P51125-3;P51125-5;P51125-4	Calpastatin
		29.9341	29.4956	29.4856	30.6073	29.6631	29.7209	29.8043	29.7851	30.16	30.2094	30.3596	30.0923	30.4808	30.2516		+		+	ko_T1_wt_T1;wt_T0_ko_T1	14	14	8	NaN	NaN	NaN	NaN	0	NaN	31478000000	939	0.0226486	0.701686	0.621578	0.280749	-0.394224	-1.20889	0.000513211	0.499652	7.93138	0.303643	-0.362357	-1.14606	0.00339333	-0.531519	-5.22587	P51881	P51881	ADP/ATP translocase 2;ADP/ATP translocase 2, N-terminally processed
		26.2944	26.5959	26.8355	26.081	26.6359	26.6316	26.6558	26.6017	26.7783	26.7277	26.7004	26.1084	25.9838	26.4302		+		+	ko_T1_wt_T1;wt_T0_ko_T1	14	11	9	NaN	49	NaN	NaN	0	NaN	3010600000	328	0.46235	0.247156	0.0084806	0.273342	0.27757	1.23019	0.00647056	0.104212	4.48803	0.209689	-0.283777	-1.43897	0.00954542	0.457135	4.07941	P61982	P61982	14-3-3 protein gamma;14-3-3 protein gamma, N-terminally processed
		27.212	27.1034	27.2292	27.0024	27.2414	27.2493	27.4114	27.4011	27.0744	26.9889	27.0079	26.9849	26.8421	26.9819		+		+	ko_T1_wt_T1;wt_T0_ko_T1	16	16	6	NaN	NaN	NaN	NaN	0	NaN	4542900000	390	0.000341656	0.162748	0.0152329	0.0419652	0.200472	2.71619	0.00375833	-0.302076	-5.10372	0.147776	0.113025	1.71095	0.00222884	0.389523	5.75158	P62137	P62137	Serine/threonine-protein phosphatase PP1-alpha catalytic subunit
		29.5343	29.5211	29.5071	30.0165	29.4767	29.3552	29.4588	29.5616	29.9289	29.8582	29.7692	29.8444	30.2233	29.8893		+		+	ko_T1_wt_T1;wt_T0_ko_T1	28	28	28	NaN	NaN	NaN	NaN	0	NaN	25613000000	1598	0.00310142	0.628478	0.125455	0.112986	-0.340921	-1.91961	0.00165753	0.389028	6.14588	0.230139	-0.207344	-1.36611	0.00547259	-0.522605	-4.67203	P63038;P63038-2	P63038	60 kDa heat shock protein, mitochondrial
		30.8234	30.5404	30.6003	31.4177	30.5647	30.6954	30.5033	30.7353	31.0655	30.8955	31.07	30.9564	31.1038	31.0417		+		+	ko_T1_wt_T1;wt_T0_ko_T1	30	30	30	NaN	NaN	NaN	NaN	0	NaN	57741000000	2414	0.0464237	0.375369	0.356358	0.467093	-0.188507	-0.786692	0.00488717	0.385675	4.79918	0.525503	-0.164895	-0.682069	0.00259949	-0.409286	-5.55473	Q03265	Q03265	ATP synthase subunit alpha, mitochondrial
		21.8525	22.0244	21.5724	21.6033	22.1553	22.0174	22.0608	21.7949	21.1369	21.6349	21.3709	21.4617	21.5057	21.5446		+		+	ko_T1_wt_T1;wt_T0_ko_T1	8	8	8	NaN	NaN	NaN	NaN	0	NaN	109880000	32	0.00119123	0.0781975	0.555166	0.0998533	0.25916	2.0162	0.0088168	-0.626202	-4.16085	0.0805909	0.382269	2.18512	0.00285967	0.503094	5.43528	Q4QRL3-2;Q4QRL3	Q4QRL3-2;Q4QRL3	Coiled-coil domain-containing protein 88B
		28.0459	27.8335	27.9421	28.8274	27.7544	28.0064	27.9644	27.912	28.4455	28.2242	28.5068	28.3815	28.3247	28.5661		+		+	ko_T1_wt_T1;wt_T0_ko_T1	17	17	17	NaN	NaN	NaN	NaN	0	NaN	9224800000	651	0.0283461	0.38466	0.350486	0.383427	-0.261844	-0.955019	0.00418544	0.482852	4.97729	0.443996	-0.229928	-0.830681	0.00220345	-0.514768	-5.76645	Q60932-2;Q60932	Q60932-2;Q60932	Voltage-dependent anion-selective channel protein 1
		29.0497	29.232	29.4582	28.9302	29.6392	29.6563	29.6002	29.7516	29.4154	29.1162	29.3327	29.335	28.8899	29.1704		+		+	ko_T1_wt_T1;wt_T0_ko_T1	13	13	13	65	65	65	NaN	0	NaN	21938000000	1056	0.0602321	0.0479933	0.00717396	0.845626	0.0357199	0.205042	0.00663913	-0.373696	-4.46022	0.472426	-0.120595	-0.776765	0.00583039	0.530011	4.60188	Q61599	Q61599	Rho GDP-dissociation inhibitor 2
		25.2487	25.237	25.0148	25.4648	25.1174	25.0489	25.0664	24.9904	25.2302	25.5101	25.4214	25.2549	25.4998	25.4834		+		+	ko_T1_wt_T1;wt_T0_ko_T1	15	15	15	NaN	NaN	NaN	NaN	0	NaN	1053400000	177	0.00681695	0.223526	0.184562	0.235827	-0.171407	-1.34693	0.00716652	0.331441	4.37823	0.308697	-0.14591	-1.13275	0.00452256	-0.356938	-4.8877	Q91YT0	Q91YT0	NADH dehydrogenase [ubiquinone] flavoprotein 1, mitochondrial
		25.6923	25.4465	25.4973	26.0724	25.4487	25.3935	25.3695	25.4794	26.1157	26.1234	25.8543	25.7476	26.0124	25.9612		+		+	ko_T1_wt_T1;wt_T0_ko_T1	6	6	6	NaN	NaN	NaN	NaN	0	NaN	1597000000	189	0.00173143	0.0702126	0.525463	0.260361	-0.229924	-1.26883	0.000614861	0.608401	7.63046	0.111729	-0.354039	-1.92833	0.00125245	-0.484285	-6.53863	Q99JR1	Q99JR1	Sideroflexin-1
		28.7881	28.7744	28.7694	28.4434	28.7543	28.6641	28.8469	28.8221	28.4725	28.2775	28.5296	28.3149	28.305	28.4911		+		+	ko_T1_wt_T1;wt_T0_ko_T1	19	19	19	NaN	NaN	NaN	NaN	0	NaN	12676000000	913	0.000638518	0.768291	0.350088	0.0333069	0.323469	2.91239	0.00764063	-0.345326	-4.31028	0.0723696	0.267277	2.27076	0.00225617	0.401518	5.73579	Q99JY9;Q641P0;Q641P0-2	Q99JY9	Actin-related protein 3
		19.896	20.4807	20.0013	19.8218	20.8792	20.0379	20.4178	20.7216	19.2864	19.629	19.52	19.3174	18.2372	17.5811		+		+	ko_T1_wt_T1;wt_T0_ko_T1	1	1	1	NaN	NaN	NaN	NaN	0	NaN	22437000	7	0.000370794	0.437522	0.0125436	0.0148063	1.67141	3.64625	0.00698547	-1.03565	-4.40556	0.0324527	0.571471	2.93477	0.00653237	2.13558	4.47773	Q9QYF9	Q9QYF9	Protein NDRG3
		20.4483	21.2663	20.8171	20.9759	20.519	20.881	20.7263	20.6215	21.1522	21.8074	21.3865	21.1794	20.8034	20.3791		+			wt_T0_ko_T1	2	2	2	NaN	NaN	NaN	NaN	0	NaN	61306000	12	0.0725485	0.0396079	0.189583	0.761475	0.0895942	0.320606	0.00911869	0.761763	4.1262	0.0772317	-0.571797	-2.21893	0.658712	-0.100372	-0.469144	O08759-3;O08759-2;O08759	O08759-3;O08759-2;O08759	Ubiquitin-protein ligase E3A
		23.7513	23.9956	23.7372	24.3297	23.8135	23.7177	23.8069	23.9016	24.1212	24.0354	24.163	24.0954	24.1139	24.6343		+			wt_T0_ko_T1	4	4	4	NaN	NaN	NaN	NaN	0	NaN	496290000	29	0.0206741	0.950546	0.192143	0.197993	-0.327724	-1.48375	0.00282598	0.296588	5.45001	0.401771	-0.153067	-0.915822	0.0283025	-0.471246	-3.05376	O55125	O55125	Protein NipSnap homolog 1
		23.6974	23.1904	23.0894	23.7143	23.4931	23.312	23.5407	23.6185	23.0128	23.1989	22.9941	23.6908	23.1432	23.6417		+			wt_T0_ko_T1	7	7	7	NaN	NaN	NaN	NaN	0	NaN	317320000	75	0.206088	0.119201	0.204163	0.7883	-0.0690511	-0.283303	0.00654772	-0.4225	-4.47519	0.140495	0.354266	1.75015	0.996248	-0.00081714	-0.00494136	O70503;O70503-2	O70503;O70503-2	Very-long-chain 3-oxoacyl-CoA reductase
		22.56	22.3665	22.1671	22.3585	22.6951	22.5563	22.5895	22.8249	21.8466	21.9877	22.2501	22.3762	22.2875	22.5486		+			wt_T0_ko_T1	5	5	4	NaN	NaN	NaN	NaN	0	NaN	178920000	51	0.00512389	0.00237389	0.674088	0.734648	-0.0410643	-0.358444	0.00339143	-0.638312	-5.22654	0.0584551	0.334891	2.44276	0.0413483	0.262357	2.72862	O70551;Q9Z0G2	O70551	SRSF protein kinase 1
		29.2261	29.345	29.126	28.7549	29.4482	29.1534	29.4689	29.3672	28.7655	28.9172	28.9419	28.9862	28.6919	29.1247		+			wt_T0_ko_T1	27	27	27	NaN	NaN	NaN	NaN	0	NaN	17913000000	1247	0.00985447	0.138501	0.391229	0.377933	0.178724	0.967051	0.00412006	-0.484575	-4.99564	0.191544	0.238125	1.50953	0.026527	0.425174	3.11079	O88342	O88342	WD repeat-containing protein 1
		19.7594	19.1437	20.5737	17.7444	22.7059	21.6056	21.0305	21.0787	18.6906	19.1289	20.0489	21.5735	19.2751	22.0304		+			wt_T0_ko_T1	1	1	1	2	2	2	NaN	0	NaN	63534000	5	0.57932	0.00523239	0.597349	0.160274	-1.65439	-1.64797	0.00967159	-2.31571	-4.06603	0.984621	0.0158377	0.0202586	0.481433	0.645482	0.760182	O88413	O88413	Tubby-related protein 3
		26.2228	26.0687	25.6207	25.8444	26.0691	26.0768	25.9282	26.0122	25.872	25.8285	25.7593	25.7836	26.2415	26.1466		+			wt_T0_ko_T1	12	12	11	NaN	NaN	NaN	NaN	0	NaN	1953600000	313	0.686021	0.164837	0.457834	0.570298	-0.11811	-0.607095	0.00922633	-0.201621	-4.11416	0.484616	0.119222	0.754376	0.78422	-0.035711	-0.288946	P06240;Q04736	P06240	Proto-oncogene tyrosine-protein kinase LCK
		22.2162	21.9266	22.9002	25.1891	21.5833	22.8115	23.1861	22.5647	24.3108	26.153	25.1922	24.3708	23.9298	24.3853		+			wt_T0_ko_T1	7	7	7	NaN	NaN	NaN	NaN	0	NaN	465870000	45	0.00481292	0.20199	0.670554	0.242465	-1.17058	-1.32509	0.00666148	2.68228	4.45659	0.0789031	-2.16064	-2.20192	0.0104161	-1.69222	-3.991	P13634	P13634	Carbonic anhydrase 1
		26.8854	26.8376	26.8501	26.402	27.0518	26.9012	27.1127	27.202	26.4689	26.3022	26.6675	26.8801	27.0206	26.6996		+			wt_T0_ko_T1	9	9	9	NaN	NaN	NaN	NaN	0	NaN	3833700000	412	0.0379957	0.00449556	0.748338	0.466353	-0.122999	-0.788078	0.00385931	-0.587358	-5.07237	0.162999	0.264229	1.63489	0.122852	0.200131	1.8544	P19157;P46425	P19157;P46425	Glutathione S-transferase P 1;Glutathione S-transferase P 2
		24.2185	24.6656	24.8561	25.2272	24.6714	24.7432	24.6068	24.7793	25.6316	26.284	25.3869	25.1265	25.4053	24.6788		+			wt_T0_ko_T1	11	11	11	NaN	NaN	NaN	NaN	0	NaN	939720000	155	0.00437055	0.11786	0.116104	0.330742	-0.328352	-1.07684	0.00548302	1.06735	4.66991	0.027872	-1.02564	-3.06722	0.098757	-0.370058	-2.02485	P24270	P24270	Catalase
		23.8528	23.7451	23.566	23.4568	24.2874	23.8283	24.0627	24.0064	23.0291	23.4636	23.4282	23.6401	24.3569	23.948		+			wt_T0_ko_T1	9	9	9	NaN	NaN	NaN	NaN	0	NaN	453110000	108	0.14272	0.00255012	0.299863	0.168617	-0.326474	-1.6086	0.00598321	-0.739239	-4.57342	0.0771413	0.348226	2.21987	0.767424	0.0645393	0.31229	P25799-2;P25799-3;P25799;P25799-4;P25799-7;P25799-6;P25799-5	P25799-2;P25799-3;P25799;P25799-4	Nuclear factor NF-kappa-B p105 subunit;Nuclear factor NF-kappa-B p50 subunit
		25.7944	25.6164	25.4189	25.6817	25.991	25.9281	25.8263	25.9757	25.5709	25.5567	25.6579	26.0327	25.9593	26.0523		+			wt_T0_ko_T1	12	12	12	NaN	NaN	NaN	NaN	0	NaN	1758400000	218	0.644761	6.57127e-05	0.30787	0.010083	-0.386929	-4.02378	0.00125969	-0.335119	-6.53034	0.749801	0.03265	0.337002	0.151574	-0.0844599	-1.69126	P25976-2;P25976	P25976-2;P25976	Nucleolar transcription factor 1
		24.8101	25.0995	24.9083	24.4793	24.8576	24.6865	24.9846	24.9088	24.283	24.1987	24.338	24.5659	24.5804	24.4344		+			wt_T0_ko_T1	11	11	11	NaN	NaN	NaN	NaN	0	NaN	840890000	107	0.00057623	0.175343	0.248402	0.119193	0.297378	1.87793	0.000839518	-0.586165	-7.13495	0.0171828	0.5511	3.50552	0.010933	0.332444	3.94245	P47226-2;P47226	P47226-2;P47226	Testin
		24.9682	24.8175	25.1973	25.6961	24.6177	24.9572	24.7413	24.8581	25.5032	25.2953	25.3315	24.9795	25.3094	25.4679		+			wt_T0_ko_T1	2	2	2	NaN	NaN	NaN	NaN	0	NaN	1029700000	58	0.036927	0.0784637	0.384134	0.761292	-0.0824992	-0.320862	0.00229422	0.583099	5.71418	0.416046	-0.206907	-0.886293	0.0271306	-0.458691	-3.09094	P48771	P48771	Cytochrome c oxidase subunit 7A2, mitochondrial
		27.0053	26.3111	26.3984	27.5235	26.7317	26.7846	26.8964	27.0925	27.3694	27.2438	27.4054	27.0966	27.6109	27.4177		+			wt_T0_ko_T1	14	8	8	53	NaN	NaN	NaN	0	NaN	4215400000	243	0.020154	0.778319	0.934838	0.175355	-0.56552	-1.57818	0.00640769	0.463258	4.49862	0.177788	-0.530018	-1.56747	0.0246708	-0.498759	-3.17519	P48962;Q3V132	P48962	ADP/ATP translocase 1
		20.4569	19.6749	19.4312	19.071	18.8022	19.5344	19.5774	19.6157	18.1708	18.2355	18.4469	18.6325	17.8596	19.2598		+			wt_T0_ko_T1	6	1	1	NaN	NaN	NaN	NaN	0	NaN	14329000	13	0.00246562	0.914841	0.312613	0.0776695	1.07454	2.21444	0.00597725	-1.09802	-4.57452	0.0116666	1.37412	3.8779	0.108556	0.798444	1.95082	P53996	P53996	Cellular nucleic acid-binding protein
		24.7036	25.1802	25.0162	24.487	25.2443	25.2417	25.2547	25.2684	24.8442	24.9605	24.9304	25.2022	24.9923	24.9583		+			wt_T0_ko_T1	13	13	13	NaN	NaN	NaN	NaN	0	NaN	1004700000	198	0.504387	0.0135763	0.206156	0.342187	-0.204192	-1.04906	9.33664e-05	-0.340577	-11.3375	0.741436	-0.0649444	-0.348815	0.0257955	0.20133	3.13555	P63005;P63005-2	P63005;P63005-2	Platelet-activating factor acetylhydrolase IB subunit alpha
		23.7371	24.0848	23.6184	23.6098	23.9221	23.7097	24.0309	23.6565	23.3608	23.3777	23.3554	23.7487	23.5831	24.0254		+			wt_T0_ko_T1	7	7	7	NaN	NaN	NaN	NaN	0	NaN	427400000	62	0.0513866	0.0511928	0.107014	0.896818	-0.0232256	-0.136412	0.00670652	-0.465179	-4.44933	0.0294561	0.397878	3.01882	0.780916	0.0440756	0.293522	Q00422	Q00422	GA-binding protein alpha chain
		20.358	20.3211	18.3939	22.9352	20.0411	21.0523	20.9211	20.1231	22.6646	22.4961	22.7156	23.0174	23.2418	21.4541		+			wt_T0_ko_T1	1	1	1	NaN	NaN	NaN	NaN	NaN	NaN	103040000	10	0.00729209	0.993905	0.945638	0.144905	-2.06903	-1.72617	0.00118831	2.09102	6.61454	0.112411	-2.12336	-1.92358	0.0153651	-2.03669	-3.61095	Q02013	Q02013	Aquaporin-1
		20.7973	23.3768	23.7055	21.1426	24.0248	23.7057	23.5914	23.805	23.1172	23.2381	23.3218	23.5349	24.2553	23.6606		+			wt_T0_ko_T1	3	3	3	NaN	NaN	NaN	NaN	0	NaN	441630000	98	0.296555	0.0319223	0.329899	0.145077	-1.56142	-1.72525	0.00560753	-0.555993	-4.64496	0.323985	-0.9702	-1.09363	0.876507	-0.0352278	-0.163528	Q07813	Q07813	Apoptosis regulator BAX
		22.8055	22.3995	21.3355	19.237	21.4284	21.5945	21.4943	21.1375	22.4484	22.6772	22.1572	21.9997	21.2006	21.0259		+			wt_T0_ko_T1	4	4	4	10	10	10	NaN	0	NaN	113370000	11	0.347441	0.376795	0.342801	0.972337	0.0356224	0.0364459	0.00196252	1.01393	5.91848	0.349504	-0.983254	-1.03171	0.986401	0.00495132	0.0179126	Q3TCN2-2;Q3TCN2	Q3TCN2-2;Q3TCN2	Putative phospholipase B-like 2;Putative phospholipase B-like 2 28 kDa form;Putative phospholipase B-like 2 40 kDa form;Putative phospholipase B-like 2 15 kDa form
		22.4186	18.4584	22.5918	18.895	22.3077	22.6355	22.3675	22.5396	18.7914	18.1487	19.4145	22.3721	23.5019	21.8095		+			wt_T0_ko_T1	24	1	1	43	NaN	NaN	NaN	0	NaN	139870000	11	0.254811	0.00324988	0.207527	0.211904	-1.97022	-1.43076	8.55854e-05	-3.67773	-11.543	0.237882	1.80611	1.34011	0.826091	-0.0985936	-0.231514	Q3TEA8;Q3TEA8-3	Q3TEA8;Q3TEA8-3	Heterochromatin protein 1-binding protein 3
		28.5587	28.1769	28.2091	28.8731	28.488	28.8469	28.6897	28.6963	29.1414	28.9905	29.0859	28.7807	29.2288	28.9563		+			wt_T0_ko_T1	18	18	18	NaN	NaN	NaN	NaN	0	NaN	13389000000	630	0.00332807	0.455413	0.229478	0.0617896	-0.534133	-2.39779	0.00893012	0.392379	4.14769	0.0260603	-0.618134	-3.12649	0.0781748	-0.308379	-2.20928	Q3U9G9	Q3U9G9	Lamin-B receptor
		24.4232	24.4022	24.0444	24.033	24.4795	24.2172	24.4565	24.423	24.125	24.0898	23.9548	24.2854	23.7551	24.0143		+			wt_T0_ko_T1	8	8	8	NaN	NaN	NaN	NaN	0	NaN	571490000	86	0.021008	0.437233	0.32407	0.303603	0.207444	1.14616	0.00980686	-0.337489	-4.05191	0.265762	0.169142	1.25255	0.0503218	0.375791	2.5653	Q3UDE2	Q3UDE2	Tubulin--tyrosine ligase-like protein 12
		20.2226	18.3413	20.8057	18.5405	20.5312	20.2581	20.8382	20.4632	17.9518	19.3545	19.1143	18.5986	20.2193	19.07		+			wt_T0_ko_T1	1	1	1	NaN	NaN	NaN	NaN	0	NaN	23127000	6	0.0648989	0.105121	0.556933	0.835132	0.181557	0.21924	0.00696981	-1.71581	-4.40796	0.445026	0.670645	0.828685	0.0348852	1.22672	2.87268	Q3UY34	Q3UY34	Uncharacterized protein C12orf43 homolog
		24.8553	24.731	24.3788	25.0785	24.9876	24.6338	24.7335	24.7191	24.4564	24.3445	24.3169	25.1478	24.8313	24.8395		+			wt_T0_ko_T1	10	10	10	NaN	NaN	NaN	NaN	0	NaN	889830000	155	0.339718	0.0437958	0.0273676	0.398862	-0.178634	-0.921943	0.00954754	-0.395894	-4.07918	0.0793392	0.388293	2.19754	0.230986	-0.171033	-1.36323	Q60737	Q60737	Casein kinase II subunit alpha
		24.5345	24.4694	23.9973	24.2619	24.4683	24.3577	24.3899	24.569	24.1675	24.0785	24.092	24.3473	24.3163	24.2366		+			wt_T0_ko_T1	13	13	13	NaN	NaN	NaN	NaN	0	NaN	636450000	133	0.0512674	0.0755069	0.725741	0.918337	0.0157216	0.107813	0.00264999	-0.333557	-5.53047	0.220345	0.203108	1.40021	0.065364	0.14617	2.35241	Q60790	Q60790	Ras GTPase-activating protein 3
		20.8579	20.4081	20.6002	20.3922	20.7804	21.1	20.658	20.9678	20.0964	20.2942	20.4483	20.791	20.6343	20.7619		+			wt_T0_ko_T1	4	4	4	NaN	NaN	NaN	NaN	0	NaN	48295000	5	0.052971	0.00347344	0.501234	0.276437	-0.164457	-1.22123	0.00893188	-0.5969	-4.14748	0.123838	0.284984	1.84818	0.283475	0.147459	1.20117	Q6P9Q6;Q6P9Q6-2	Q6P9Q6;Q6P9Q6-2	FK506-binding protein 15
		20.2106	19.3162	19.2205	19.6892	20.1814	20.3507	20.2989	20.3016	19.3679	19.7347	19.8803	20.3371	20.3615	20.2805		+			wt_T0_ko_T1	2	2	2	NaN	NaN	NaN	NaN	NaN	NaN	28421000	4	0.756631	0.00107669	0.977544	0.043197	-0.717263	-2.69197	0.00569518	-0.622197	-4.62778	0.867277	-0.0518395	-0.175897	0.400279	-0.0432262	-0.918956	Q7TQK1;Q7TQK1-2	Q7TQK1;Q7TQK1-2	Integrator complex subunit 7
		20.8372	19.0131	20.6325	20.6995	21.5437	21.6002	21.2464	21.5539	20.321	20.7924	20.7743	20.4332	21.8017	20.9656		+			wt_T0_ko_T1	4	4	4	NaN	NaN	NaN	NaN	0	NaN	63790000	14	0.894495	0.0191346	0.258647	0.260303	-0.771305	-1.26901	0.00310112	-0.856824	-5.33531	0.552537	-0.333718	-0.636345	0.28061	0.419237	1.20928	Q80TR8-4;Q80TR8;Q80TR8-2;Q80TR8-3	Q80TR8-4;Q80TR8;Q80TR8-2;Q80TR8-3	Protein VPRBP
		27.9339	27.4656	27.2904	28.3616	27.6124	27.5678	27.8132	27.756	28.014	28.0853	27.9845	27.812	28.2922	28.153		+			wt_T0_ko_T1	25	25	22	NaN	NaN	NaN	NaN	0	NaN	7024400000	711	0.0635885	0.909316	0.683826	0.344769	-0.322849	-1.04291	0.00554025	0.34057	4.65836	0.397765	-0.265015	-0.924258	0.0340547	-0.398404	-2.89332	Q8BH59	Q8BH59	Calcium-binding mitochondrial carrier protein Aralar1
		22.6776	22.2004	22.7991	22.4036	23.1768	23.2565	23.2476	23.4308	22.3081	21.8959	22.1942	23.0249	22.1525	22.9124		+			wt_T0_ko_T1	2	2	2	NaN	NaN	NaN	NaN	0	NaN	221820000	17	0.00978484	0.00118222	0.538406	0.555322	-0.176457	-0.631719	0.000223061	-1.1452	-9.45903	0.0968676	0.387403	2.04001	0.0584271	0.581344	2.44315	Q8BHG2;Q8BHG2-2;Q8BHG2-3	Q8BHG2;Q8BHG2-2;Q8BHG2-3	UPF0587 protein C1orf123 homolog
		24.0156	23.9313	23.786	23.5506	24.3483	23.9153	24.0857	24.1437	23.2269	23.3262	23.6646	24.0997	23.6122	24.2822		+			wt_T0_ko_T1	5	5	5	NaN	NaN	NaN	NaN	0	NaN	471710000	62	0.061729	0.00728717	0.285482	0.429393	-0.177175	-0.85939	0.00541295	-0.717355	-4.68424	0.0522106	0.414992	2.535	0.554764	0.125189	0.632645	Q8BVQ5	Q8BVQ5	Protein phosphatase methylesterase 1
		24.4468	24.5226	24.7111	23.8641	24.9618	24.3309	24.4129	24.6865	23.9341	23.4444	23.8123	24.9294	23.7286	24.2037		+			wt_T0_ko_T1	8	8	8	NaN	NaN	NaN	NaN	0	NaN	695100000	113	0.0438718	0.113695	0.429761	0.796247	0.0989649	0.272343	0.00895624	-0.867752	-4.14468	0.0461572	0.655909	2.63674	0.399531	0.310808	0.920532	Q8K352	Q8K352	SAM and SH3 domain-containing protein 3
		23.4246	26.5925	22.2922	23.9214	24.0325	25.22	22.6251	23.8174	19.8845	20.6951	20.8322	23.8199	24.8324	25.9432		+			wt_T0_ko_T1	4	4	4	NaN	NaN	NaN	NaN	0	NaN	742920000	53	0.0826377	0.0238404	0.00800132	0.528838	-0.807482	-0.676345	0.00373903	-3.45318	-5.10983	0.0228711	3.58708	3.24307	0.298451	-0.94138	-1.15993	Q8VDP6	Q8VDP6	CDP-diacylglycerol--inositol 3-phosphatidyltransferase
		20.5824	21.0495	20.9983	21.0693	20.6557	20.8055	20.7576	20.9015	21.2578	21.5941	21.33	20.5884	20.6742	21.1708		+			wt_T0_ko_T1	2	2	2	NaN	NaN	NaN	NaN	0	NaN	62062000	15	0.0541798	0.0150401	0.0852021	0.601137	0.113768	0.557633	0.00205122	0.613902	5.86008	0.0331539	-0.469092	-2.91635	0.856874	-0.0310413	-0.189877	Q8VE95	Q8VE95	UPF0598 protein C8orf82 homolog
		27.9879	27.4665	27.3893	28.4757	27.6075	27.6802	27.714	27.3947	28.3406	28.1405	28.0538	27.8787	27.9479	27.9705		+			wt_T0_ko_T1	11	11	11	NaN	NaN	NaN	NaN	0	NaN	7306700000	327	0.0589852	0.164971	0.963146	0.746654	-0.102528	-0.341439	0.00336527	0.579209	5.23589	0.308828	-0.348449	-1.13241	0.0127268	-0.333288	-3.79243	Q8VEM8	Q8VEM8	Phosphate carrier protein, mitochondrial
		19.4417	19.6798	20.7234	20.6369	20.9822	20.4772	20.8836	21.2242	19.3167	19.1248	19.4649	20.5004	20.9632	20.5345		+			wt_T0_ko_T1	2	2	2	NaN	NaN	NaN	NaN	0	NaN	43032000	17	0.0442861	0.00103714	0.221089	0.237546	-0.545586	-1.34122	0.000528766	-1.58971	-7.88096	0.0935838	0.818352	2.0671	0.356467	0.225771	1.01549	Q91YL2	Q91YL2	E3 ubiquitin-protein ligase RNF126
		25.559	25.5987	25.5288	25.3004	25.6436	25.6989	25.6633	25.7868	25.4484	25.2488	25.3857	25.6482	25.6192	25.6234		+			wt_T0_ko_T1	9	9	5	NaN	NaN	NaN	NaN	0	NaN	1492100000	194	0.0710631	0.000953597	0.516174	0.154392	-0.133506	-1.67698	0.00283731	-0.337168	-5.44503	0.205483	0.135772	1.45479	0.136	0.0678905	1.77539	Q99JT2;Q9Z2W1	Q99JT2	Serine/threonine-protein kinase 26
		27.2322	27.0292	27.2989	27.9048	26.7827	27.2598	27.0588	26.9338	27.6379	27.6529	27.6277	27.2519	27.4096	27.371		+			wt_T0_ko_T1	9	9	9	NaN	NaN	NaN	NaN	0	NaN	4821000000	316	0.0388467	0.0260173	0.813216	0.926033	0.0221068	0.0976114	0.00325935	0.630737	5.27462	0.275119	-0.273249	-1.22504	0.044621	-0.335381	-2.66489	Q9CQQ7	Q9CQQ7	ATP synthase F(0) complex subunit B1, mitochondrial
		22.8299	23.1352	22.5181	22.5999	23.0245	22.6928	23.2214	23.09	21.8276	22.3401	22.3943	22.8456	23.1503	22.9828		+			wt_T0_ko_T1	6	6	6	23	23	23	NaN	0	NaN	234950000	72	0.0509995	0.00485654	0.060989	0.27074	-0.222101	-1.2378	0.00961526	-0.819867	-4.07198	0.0470733	0.58348	2.62043	0.928848	0.014286	0.0938838	Q9CQR6	Q9CQR6	Serine/threonine-protein phosphatase 6 catalytic subunit;Serine/threonine-protein phosphatase 6 catalytic subunit, N-terminally processed
		23.7019	23.9852	23.7739	24.3272	23.5892	23.9002	23.9277	23.8467	24.321	24.1464	24.4407	23.8465	24.3605	24.614		+			wt_T0_ko_T1	1	1	1	NaN	NaN	NaN	NaN	NaN	NaN	508800000	41	0.0148742	0.538263	0.720181	0.250595	-0.32662	-1.29907	0.0085841	0.486741	4.18851	0.106156	-0.355646	-1.96829	0.0810816	-0.457715	-2.18031	Q9CQZ6	Q9CQZ6	NADH dehydrogenase [ubiquinone] 1 beta subcomplex subunit 3
		26.7661	26.4114	26.983	27.5216	26.5573	27.0909	26.8401	26.7933	27.3953	27.3659	27.5275	26.8307	27.0653	27.175		+			wt_T0_ko_T1	11	11	11	NaN	NaN	NaN	NaN	0	NaN	4015700000	289	0.0491862	0.172931	0.359388	0.734754	-0.103129	-0.358294	0.00650712	0.609195	4.48193	0.126729	-0.509052	-1.83023	0.246177	-0.203271	-1.31311	Q9CR68	Q9CR68	Cytochrome b-c1 complex subunit Rieske, mitochondrial;Cytochrome b-c1 complex subunit 11
		24.0365	24.0823	24.1005	23.6827	24.2431	24.1904	24.3811	24.0962	23.6543	23.6437	23.6223	24.0467	23.6747	23.781		+			wt_T0_ko_T1	8	8	8	NaN	NaN	NaN	NaN	0	NaN	516030000	116	0.00128898	0.0192503	0.731384	0.385797	0.141384	0.949871	0.000414958	-0.587581	-8.2985	0.0349643	0.335387	2.87074	0.0195687	0.393578	3.38494	Q9QYJ3;Q9D832	Q9QYJ3	DnaJ homolog subfamily B member 1
		26.2653	25.8027	25.9148	26.6323	25.8593	26.2757	26.2828	26.1728	26.7339	26.5697	26.6786	26.3427	26.5686	26.5395		+			wt_T0_ko_T1	5	5	5	NaN	NaN	NaN	NaN	0	NaN	2459600000	236	0.0090526	0.552686	0.527322	0.210404	-0.329834	-1.43632	0.00910632	0.513043	4.12759	0.0744368	-0.506939	-2.24829	0.0512094	-0.335938	-2.55091	Q9R0P6	Q9R0P6	Signal peptidase complex catalytic subunit SEC11A
		20.1593	19.1509	18.1578	20.967	19.925	18.7053	18.5989	18.1248	20.8469	22.499	21.4534	19.858	18.9132	18.9257		+			wt_T0_ko_T1	2	2	2	NaN	NaN	NaN	NaN	0	NaN	14301000	10	0.0350588	0.0132679	0.133775	0.64461	0.376425	0.490404	0.00613284	2.76129	4.54637	0.0610103	-1.99104	-2.40806	1	0	0	Q9R111	Q9R111	Guanine deaminase
		22.8893	22.9715	23.7616	23.2636	23.1578	22.9485	22.8193	22.9802	23.526	23.8437	23.381	23.2336	23.4746	23.8328		+			wt_T0_ko_T1	3	3	3	NaN	NaN	NaN	NaN	0	NaN	298350000	37	0.0155632	0.292283	0.583386	0.336643	-0.292151	-1.06242	0.00767391	0.607159	4.30569	0.222135	-0.362083	-1.39387	0.0237499	-0.537226	-3.2092	Q9Z1P6	Q9Z1P6	NADH dehydrogenase [ubiquinone] 1 alpha subcomplex subunit 7
		19.7748	21.5906	21.3231	20.3066	21.7639	21.9077	22.6836	21.8221	19.9023	20.1287	17.8714	21.6161	21.5639	21.8001		+			wt_T0_ko_T1	6	6	6	NaN	NaN	NaN	NaN	0	NaN	93484000	45	0.0510279	0.00160979	0.227222	0.13291	-0.91127	-1.79324	0.00843442	-2.74352	-4.20677	0.124164	1.44799	1.84614	0.201656	0.38426	1.46945	Q9Z1R2	Q9Z1R2	Large proline-rich protein BAG6
		21.8953	21.9019	21.7529	21.7162	21.7317	21.8758	22.1109	22.2189	22.1545	22.1096	21.823	21.8941	22.4348	22.0052						5	5	5	NaN	NaN	NaN	NaN	0	NaN	127490000	22	0.148014	0.249166	0.70158	0.105068	-0.294766	-1.97635	0.787167	0.0447238	0.284869	0.0959514	-0.212446	-2.04747	0.53349	-0.127044	-0.668401	A2A432-2;A2A432;Q3TCH7	A2A432-2;A2A432	Cullin-4B
		22.8265	23.2708	23.1371	23.0144	23.5826	23.0973	23.289	23.2717	23.4089	23.2202	23.0544	23.5593	23.0462	23.3727						7	7	7	NaN	NaN	NaN	NaN	0	NaN	296630000	80	0.434608	0.126859	0.517231	0.177108	-0.263824	-1.57045	0.59887	-0.0823051	-0.561216	0.292412	-0.16561	-1.17633	0.930279	-0.0159087	-0.0919892	A2ADY9	A2ADY9	Protein DDI1 homolog 2
		23.0997	22.7422	22.15	22.2914	22.3089	22.2048	22.406	22.8518	22.6411	22.6428	22.1872	22.6436	23.2354	22.2216						8	8	8	NaN	NaN	NaN	NaN	0	NaN	185660000	34	0.67769	0.936175	0.432835	0.730771	-0.12937	-0.363962	0.830562	0.0475322	0.225439	0.78998	0.0804208	0.280983	0.427521	-0.257323	-0.863125	A2AF47	A2AF47	Dedicator of cytokinesis protein 11
		19.8999	20.5771	20.2339	20.4456	20.0137	20.5803	20.8691	20.5855	21.2502	19.1618	20.288	20.712	20.6955	19.4808						3	3	3	1	1	1	NaN	0	NaN	43241000	13	0.692823	0.650804	0.815342	0.986183	-0.00697549	-0.0182003	0.632361	-0.27882	-0.509078	0.92092	0.0557775	0.104388	0.613717	0.216067	0.537899	A2AN08-3;A2AN08;A2AN08-5;A2AN08-2	A2AN08-3;A2AN08;A2AN08-5;A2AN08-2	E3 ubiquitin-protein ligase UBR4
		23.1559	23.2201	22.7831	23.2141	22.7276	23.1463	22.8582	23.22	21.3349	22.6556	22.6708	22.282	23.2996	22.7371						6	6	6	NaN	NaN	NaN	NaN	0	NaN	251480000	54	0.0475549	0.475976	0.202181	0.297329	0.320387	1.16295	0.109877	-0.767574	-1.94137	0.0756768	0.872866	2.23512	0.480521	0.215095	0.761851	A2AQ19	A2AQ19	RNA polymerase-associated protein RTF1 homolog
		21.62	21.6956	21.0954	18.3853	21.8093	21.2547	21.1253	22.0492	20.3244	18.3205	20.8227	21.9834	21.6747	21.2977						4	4	4	NaN	NaN	NaN	NaN	0	NaN	82363000	31	0.516912	0.051693	0.425934	0.357655	-0.952855	-1.01274	0.0535556	-1.73709	-2.51415	0.47138	0.876522	0.778705	0.777335	-0.0922901	-0.298491	A2AR02	A2AR02	Peptidyl-prolyl cis-trans isomerase G
		26.1212	25.7927	26.0673	26.7187	26.4828	25.8956	26.2241	26.054	28.3135	26.5684	26.4393	26.3113	26.4649	26.8572						4	4	4	NaN	NaN	NaN	NaN	NaN	NaN	2686000000	39	0.0506889	0.417688	0.372663	0.226179	-0.369512	-1.37973	0.133612	0.942959	1.78914	0.154376	-0.932105	-1.67706	0.117665	-0.380366	-1.88798	A2ASS6-2;A2ASS6;A2ASS6-3	A2ASS6-2;A2ASS6	Titin
		23.073	19.3656	23.1756	23.2544	22.795	23.3987	22.7164	23.0508	19.4773	23.109	23.5177	23.297	23.4869	23.1236						2	2	2	NaN	NaN	NaN	NaN	0	NaN	243320000	8	0.935699	0.233271	0.759017	0.380498	-1.08538	-0.961415	0.420649	-0.955575	-0.876941	0.911219	0.182454	0.117259	0.182738	-0.31226	-1.54614	A2BDX3	A2BDX3	Adenylyltransferase and sulfurtransferase MOCS3;Molybdopterin-synthase adenylyltransferase;Molybdopterin-synthase sulfurtransferase
		21.3082	19.2817	20.6756	20.5787	20.6409	21.1919	20.5829	18.2614	19.5126	18.7229	20.4611	21.0574	19.816	20.3972						3	3	3	NaN	NaN	NaN	NaN	0	NaN	45278000	21	0.556724	0.70827	0.301221	0.951365	0.0375482	0.0641122	0.521884	-0.603719	-0.688308	0.230154	0.895502	1.36606	0.770702	-0.254235	-0.307719	A2BE28-2;A2BE28	A2BE28-2;A2BE28	Ribosomal biogenesis protein LAS1L
		22.2458	22.162	22.2829	22.2694	22.2012	22.6536	22.5683	21.94	22.675	22.6008	22.1207	22.2781	22.3357	22.4938						8	8	8	NaN	NaN	NaN	NaN	0	NaN	160350000	51	0.337525	0.898455	0.452535	0.0946339	-0.129203	-2.05833	0.631226	0.124694	0.510819	0.190232	-0.225454	-1.51488	0.894255	-0.0284432	-0.139826	A2BH40;A2BH40-3;A2BH40-4;A2BH40-2	A2BH40;A2BH40-3;A2BH40-4;A2BH40-2	AT-rich interactive domain-containing protein 1A
		19.5379	19.348	20.8451	18.2233	19.9149	21.1291	22.2565	18.542	18.8168	20.2409	19.3105	19.9893	19.6076	18.0345						2	2	2	NaN	NaN	NaN	NaN	NaN	NaN	34638000	2	0.34424	0.497433	0.368158	0.74502	0.278103	0.343747	0.364431	-1.0045	-0.997241	0.966014	0.0324806	0.0447824	0.295002	1.25013	1.16926	A3KGF7-2;A3KGF7-3;A3KGF7;A3KGF7-4	A3KGF7-2;A3KGF7-3;A3KGF7;A3KGF7-4	1-phosphatidylinositol 4,5-bisphosphate phosphodiesterase beta-2
		21.7497	22.5675	22.2743	22.1184	21.9971	22.2109	22.4293	22.1812	21.9909	22.143	20.788	21.0477	21.537	16.795						6	6	6	17	17	17	NaN	0	NaN	121190000	31	0.050887	0.265367	0.188863	0.120603	2.38423	1.86877	0.191458	-0.56405	-1.50988	0.248613	0.536888	1.30534	0.114754	2.41139	1.90749	A3KMP2;A3KMP2-2	A3KMP2;A3KMP2-2	Tetratricopeptide repeat protein 38
		19.9809	20.6394	19.9765	20.1664	20.1472	19.9924	20.1453	19.2273	17.8394	20.2537	20.3461	20.2	21.0846	19.5329						1	1	1	NaN	NaN	NaN	NaN	NaN	NaN	28299000	4	0.7158	0.708339	0.220201	0.85306	-0.0816806	-0.195012	0.610786	-0.398312	-0.542474	0.363141	0.711074	1.00017	0.427792	-0.394443	-0.862583	A6PWY4-2;A6PWY4	A6PWY4-2;A6PWY4	WD repeat-containing protein 76
		19.6337	19.3969	19.7873	20.6941	19.8673	20.3443	20.4649	20.3231	18.8311	19.8202	20.7942	19.8946	20.8231	19.0464						1	1	1	NaN	NaN	NaN	NaN	NaN	NaN	29499000	15	0.607839	0.496493	0.726551	0.939699	-0.0433318	-0.0795266	0.423454	-0.434719	-0.87128	0.918088	0.0628198	0.108143	0.503903	0.328568	0.719759	A6X919	A6X919	Probable C-mannosyltransferase DPY19L1
		18.9567	18.2049	20.7356	20.608	19.8861	21.7754	20.0526	18.5313	18.7881	19.5815	19.8043	20.2113	19.5456	19.6001						1	1	1	NaN	NaN	NaN	NaN	NaN	NaN	30132000	2	0.659106	0.469843	0.971856	0.84196	-0.159361	-0.209996	0.45529	-0.670035	-0.808964	0.775698	0.235019	0.300765	0.746569	0.275655	0.34156	A7L9Z8	A7L9Z8	Calcium-transporting ATPase type 2C member 2
		21.4315	20.9217	21.4188	21.3903	21.1522	20.9264	21.6419	21.8406	21.3767	19.6525	20.9783	20.8735	21.6747	21.5655						2	2	2	NaN	NaN	NaN	NaN	0	NaN	92402000	15	0.282678	0.228812	0.310701	0.765156	-0.0806197	-0.315457	0.211042	-0.72111	-1.43395	0.23445	0.621422	1.35154	0.955732	0.0190679	0.0583472	B1AVZ0	B1AVZ0	Uracil phosphoribosyltransferase homolog
		20.6065	20.4112	20.2899	20.3643	20.3617	20.4505	20.6103	20.53	19.9164	20.3746	20.4759	20.3435	19.43	20.2519						4	4	4	NaN	NaN	NaN	294	0	NaN	43357000	12	0.0582241	0.667238	0.315486	0.170362	0.409489	1.60061	0.199186	-0.232519	-1.47906	0.369671	0.162346	0.985417	0.114287	0.479662	1.91067	B1AY13;B1AY13-2	B1AY13	Ubiquitin carboxyl-terminal hydrolase 24
		21.4653	21.7524	20.5177	21.5091	21.3259	21.054	20.9496	21.1892	21.0649	20.9912	20.5426	21.3178	21.4222	21.0265						4	4	4	3	3	3	NaN	0	NaN	71428000	28	0.415949	0.741253	0.159927	0.87532	0.0555844	0.165116	0.176273	-0.263446	-1.57412	0.259036	0.444893	1.27287	0.40502	-0.125863	-0.909031	B1AZI6	B1AZI6	THO complex subunit 2
		21.2877	18.4825	21.6499	21.3366	20.8841	21.204	21.7532	21.5101	20.982	19.1594	21.2379	21.1671	21.0746	20.8845						3	3	3	NaN	NaN	NaN	NaN	0	NaN	69260000	20	0.630552	0.263827	0.951224	0.704405	-0.352908	-0.401837	0.19756	-0.878092	-1.48545	0.83298	0.229393	0.222158	0.261124	0.295792	1.26651	B1AZP2-3;B1AZP2-2;B1AZP2	B1AZP2-3;B1AZP2-2;B1AZP2	Disks large-associated protein 4
		23.3131	23.3049	23.0044	23.2402	23.1965	23.0944	23.3867	23.3765	23.4252	23.5948	23.1782	23.4403	23.4788	23.1569						12	12	12	NaN	NaN	NaN	NaN	0	NaN	320950000	142	0.149448	0.913246	0.630361	0.288824	-0.142966	-1.18622	0.349685	0.135881	1.03129	0.224165	-0.183741	-1.38675	0.462942	-0.095106	-0.794479	B2RQC6;B2RQC6-2	B2RQC6;B2RQC6-2	CAD protein;Glutamine-dependent carbamoyl-phosphate synthase;Aspartate carbamoyltransferase;Dihydroorotase
		20.9911	19.8983	20.2112	21.6651	20.3979	21.2278	21.1648	21.1299	20.8062	21.0977	21.3361	20.975	21.7389	21.0796						3	3	3	NaN	NaN	NaN	NaN	0	NaN	64949000	13	0.269295	0.411573	0.859966	0.313264	-0.573069	-1.12089	0.720632	0.099933	0.378451	0.461674	-0.388584	-0.796866	0.394573	-0.284418	-0.931028	B2RUP2-2;B2RUP2	B2RUP2-2;B2RUP2	Protein unc-13 homolog D
		24.5268	24.6241	23.9757	23.8868	24.4499	24.1531	24.5131	24.8544	24.2906	24.3703	24.1593	24.1963	24.6148	24.2669						16	16	16	NaN	NaN	NaN	NaN	0	NaN	639880000	163	0.717804	0.276373	0.625467	0.686097	-0.105965	-0.428533	0.272506	-0.219207	-1.23263	0.933335	-0.0200693	-0.0879434	0.537931	0.133311	0.660861	B2RXR6;Q505D1	B2RXR6	Serine/threonine-protein phosphatase 6 regulatory ankyrin repeat subunit B
		25.4924	25.2617	25.2024	25.2567	25.1244	25.4864	25.2069	25.451	25.438	25.2702	25.3572	25.1894	25.5591	24.9915						12	12	12	NaN	NaN	NaN	NaN	0	NaN	1195800000	162	0.92555	0.697819	0.544274	0.735703	0.0566378	0.356945	0.751141	0.0379559	0.335114	0.574412	-0.0518433	-0.600403	0.70326	0.0705252	0.403496	B2RY56	B2RY56	RNA-binding protein 25
		24.4553	24.6696	25.182	25.4255	24.8837	24.4633	24.833	24.2922	20.7166	19.0566	25.2168	25.2528	24.7437	24.4844						4	4	4	NaN	NaN	NaN	NaN	0	NaN	841550000	25	0.081909	0.164215	0.0526349	0.757481	0.106155	0.326203	0.114746	-2.95474	-1.90755	0.090561	3.26978	2.09294	0.44807	-0.208893	-0.822802	B9EJ86;Q9ER64	B9EJ86	Oxysterol-binding protein
		22.719	22.1113	22.616	22.8186	22.1019	23.1433	22.9007	21.3403	23.085	22.0505	22.7397	22.4803	22.473	22.8836						1	1	1	NaN	NaN	NaN	NaN	NaN	NaN	189540000	8	0.622044	0.697287	0.763735	0.840849	-0.04608	-0.211498	0.662647	0.253495	0.463254	0.859286	-0.0588179	-0.186631	0.648931	-0.240757	-0.483862	B9EKR1	B9EKR1	Receptor-type tyrosine-protein phosphatase zeta
		25.0214	25.0233	24.8733	25.0935	25.2027	25.1229	25.1022	25.5876	25.2112	24.8681	25.1613	25.1608	25.6016	25.138						14	14	13	NaN	NaN	31	NaN	0	NaN	1220600000	162	0.572798	0.0469162	0.886496	0.0831825	-0.297263	-2.16004	0.330658	-0.173671	-1.07705	0.494548	-0.0773164	-0.73643	0.811603	-0.0462759	-0.251273	D0QMC3;O35368-2;Q8CGE8;Q08619;P15092-2;P15092	D0QMC3	Myeloid cell nuclear differentiation antigen-like protein
		25.9619	25.9014	26.0279	25.793	26.145	26.0911	25.8893	26.5424	26.1731	25.854	25.8673	25.7436	26.3623	25.8574						15	15	7	NaN	NaN	NaN	NaN	0	NaN	2081200000	343	0.600071	0.252375	0.393729	0.710362	-0.0667226	-0.393223	0.321443	-0.202143	-1.10002	0.695052	-0.0437511	-0.415432	0.465455	0.179172	0.789759	D3YXK2	D3YXK2	Scaffold attachment factor B1
		26.9918	26.8758	27.3617	26.7157	27.0666	27.1646	27.2063	27.1995	27.1672	26.9827	27.2539	26.9115	26.9812	27.0473						15	15	13	NaN	NaN	NaN	NaN	0	NaN	4346900000	470	0.86902	0.726116	0.103364	0.971294	0.00627057	0.0378216	0.761697	-0.0246565	-0.320295	0.437157	-0.148333	-0.844035	0.0161213	0.17926	3.56544	D3Z6Q9;Q7TQF7	D3Z6Q9	Bridging integrator 2
		24.7191	24.4275	24.3615	24.3795	24.5589	24.5037	24.6604	25.0235	24.6737	24.9612	24.9186	24.7526	25.0256	24.7744						11	11	11	NaN	NaN	NaN	NaN	0	NaN	804490000	187	0.0215116	0.24317	0.307052	0.0274915	-0.378996	-3.0793	0.343495	0.164523	1.04594	0.028214	-0.379247	-3.05651	0.341964	-0.164272	-1.0496	D3Z7P3-2;D3Z7P3	D3Z7P3-2;D3Z7P3	Glutaminase kidney isoform, mitochondrial
		22.9554	20.1021	22.1314	23.4107	21.8153	21.4258	21.7913	22.8926	22.6724	22.2185	22.9964	22.0373	22.5847	22.8098						3	3	3	NaN	NaN	NaN	NaN	0	NaN	167610000	24	0.343817	0.746448	0.986655	0.727263	-0.327368	-0.368964	0.183136	0.647844	1.54445	0.612058	-0.479191	-0.540487	0.291613	-0.496021	-1.17853	E9PV24-2;E9PV24	E9PV24-2;E9PV24	Fibrinogen alpha chain;Fibrinopeptide A;Fibrinogen alpha chain
		21.3162	21.3011	20.6638	21.0397	20.9931	20.6973	21.184	22.104	19.3206	20.5741	19.9792	22.0611	21.369	21.2045						9	9	9	NaN	NaN	NaN	NaN	0	NaN	75429000	8	0.165304	0.0172882	0.0269216	0.163067	-0.464712	-1.63457	0.0408416	-1.28662	-2.73898	0.0244748	1.12218	3.18231	0.50748	-0.300272	-0.713441	E9PVA8	E9PVA8
		29.76	29.9644	30.1245	30.4364	19.8842	30.3409	30.2507	30.3533	31.1166	18.957	30.3376	30.2138	30.1323	30.4305						2	2	2	NaN	NaN	NaN	NaN	NaN	NaN	31617000000	25	0.877104	0.954766	0.22625	0.35608	-0.187575	-1.01638	0.849078	-0.90352	-0.200381	0.366519	3.26759	0.992513	0.446042	-2.55164	-0.826717	E9PZM4	E9PZM4	Chromodomain-helicase-DNA-binding protein 2
		21.4146	21.7927	21.4286	21.4179	20.3015	20.1351	20.9087	21.9677	21.3925	20.8023	20.8616	20.5103	21.6793	20.8587						5	5	4	NaN	NaN	NaN	NaN	0	NaN	66224000	22	0.620926	0.216293	0.282791	0.169698	0.497369	1.60364	0.726561	0.190562	0.369966	0.0494838	0.494654	2.57914	0.755027	-0.187847	-0.32965	E9Q1P8	E9Q1P8	Interferon regulatory factor 2-binding protein 2
		23.1996	23.4183	23.4784	22.8611	23.2904	22.974	23.2451	23.7901	22.6106	21.9905	22.8684	22.8472	22.8698	22.8122						14	14	14	NaN	NaN	NaN	NaN	0	NaN	281360000	77	0.00466228	0.26119	0.449096	0.0623183	0.396294	2.3909	0.0373314	-0.835097	-2.81492	0.0407507	0.749552	2.74085	0.0625069	0.481839	2.38846	E9Q394-2;E9Q394	E9Q394-2;E9Q394
		19.3268	22.0554	22.2594	19.1249	22.256	22.2946	22.2035	18.0606	19.0882	20.7298	19.5919	19.3076	18.1304	21.8861						3	3	3	NaN	NaN	NaN	NaN	NaN	NaN	82206000	18	0.248169	0.770474	0.780648	0.532082	0.916921	0.6708	0.332173	-1.40038	-1.07332	0.449311	0.888347	0.82041	0.398491	1.42895	0.922725	E9Q414	E9Q414	Apolipoprotein B-100;Apolipoprotein B-48
		21.6043	21.964	21.4132	19.2456	21.5169	21.2575	22.4858	22.1557	21.2544	20.8667	20.5467	21.4324	22.0337	21.146						11	11	11	3	3	3	NaN	0	NaN	100960000	23	0.580291	0.110833	0.863867	0.554543	-0.480594	-0.633012	0.0502327	-0.964727	-2.56676	0.831375	0.16755	0.224336	0.464367	0.316584	0.7918	E9Q555	E9Q555	E3 ubiquitin-protein ligase RNF213
		22.9493	23.7731	23.9905	24.2282	23.5024	23.9911	23.165	23.9792	23.4763	24.2049	23.7444	23.8684	26.0849	23.7014						9	9	9	NaN	NaN	NaN	NaN	0	NaN	537020000	56	0.244353	0.492543	0.318724	0.309497	-0.816322	-1.13066	0.636316	0.149088	0.503026	0.85248	-0.073228	-0.195793	0.249524	-0.892181	-1.30246	E9Q557	E9Q557	Desmoplakin
		17.9493	19.4975	19.4091	18.8427	19.5249	19.5179	19.3343	18.6605	19.675	20.4484	19.6594	20.5751	17.9827	18.9872						2	2	2	NaN	NaN	NaN	NaN	0	NaN	11188000	7	0.288753	0.759854	0.219959	0.748626	-0.257037	-0.338657	0.0953418	0.668216	2.05248	0.0880786	-1.00297	-2.11485	0.912958	0.0777205	0.114951	P70248;E9Q634	P70248;E9Q634	Unconventional myosin-If;Unconventional myosin-Ie
		27.1489	27.0708	26.8147	26.9136	27.0688	27.1478	27.0701	27.4338	27.1986	27.0479	26.9901	26.9389	27.6502	27.2173						56	56	56	28	28	28	NaN	0	NaN	4517900000	681	0.443189	0.117425	0.98904	0.207663	-0.281792	-1.44655	0.418448	-0.10124	-0.881402	0.414604	-0.0918687	-0.889241	0.677733	-0.0886838	-0.440847	F6ZDS4	F6ZDS4	Nucleoprotein TPR
		19.1246	18.9737	18.9264	19.2357	18.8281	18.9981	19.2811	19.236	19.2493	19.1907	18.5435	19.3313	20.0994	18.9782						2	2	2	NaN	NaN	NaN	NaN	0	NaN	11080000	7	0.4143	0.263829	0.244798	0.220929	-0.404521	-1.39814	0.704122	-0.0913057	-0.402247	0.74682	0.0706096	0.341206	0.262409	-0.383825	-1.26262	Q6Q477-2;Q6Q477;G5E829;Q9R0K7	Q6Q477-2;Q6Q477;G5E829;Q9R0K7	Calcium-transporting ATPase;Plasma membrane calcium-transporting ATPase 1;Plasma membrane calcium-transporting ATPase 2
		22.6008	22.4255	22.2531	22.116	22.1992	22.6301	22.3803	22.2784	22.2506	22.5945	22.3305	22.3345	22.1642	22.5186						8	8	8	NaN	NaN	NaN	NaN	0	NaN	171540000	50	0.961786	0.928534	0.720775	0.951023	0.00975148	0.0645636	0.893186	0.0198978	0.141251	0.788109	-0.043042	-0.283566	0.823623	0.0328957	0.234872	G5E870	G5E870	E3 ubiquitin-protein ligase TRIP12
		18.38	21.8312	21.6195	22.6503	21.4944	21.6177	21.4188	22.3265	22.5971	23.0832	22.5224	22.8016	23.1297	22.2538						1	1	1	1	1	1	NaN	NaN	NaN	122720000	3	0.0482486	0.572912	0.618748	0.214904	-1.60813	-1.41978	0.0162936	1.01983	3.55542	0.20982	-1.61398	-1.43848	0.0265603	-1.01398	-3.10969	G5E8P0	G5E8P0
		24.7411	24.8399	24.9651	24.3842	24.7707	24.7332	25.1647	25.1603	25.0687	24.7965	24.6105	24.6558	24.8994	24.9076						11	11	11	NaN	NaN	NaN	NaN	0	NaN	920490000	164	0.860762	0.316364	0.367116	0.611301	-0.0883341	-0.541671	0.494761	-0.131952	-0.736047	0.637675	-0.0926542	-0.500952	0.423994	0.136272	0.870193	O08529	O08529	Calpain-2 catalytic subunit
		25.3635	25.7042	26.1613	25.4965	25.7817	26.0146	25.6617	26.0344	25.7674	25.6714	25.7943	25.3473	25.7302	25.4124						13	11	11	NaN	NaN	NaN	NaN	0	NaN	1683500000	127	0.247106	0.979157	0.11558	0.456692	0.184762	0.806297	0.302137	-0.128743	-1.15006	0.775298	-0.0629792	-0.301321	0.0496568	0.376485	2.57626	O08539-2;O08539	O08539-2;O08539	Myc box-dependent-interacting protein 1
		26.765	26.7142	26.8749	27.0615	26.3345	27.2192	27.0667	26.2179	26.9456	26.807	27.5773	27.4282	26.899	27.2778						8	8	8	NaN	NaN	NaN	NaN	0	NaN	4799400000	102	0.086375	0.829003	0.561873	0.0819075	-0.347774	-2.17228	0.315882	0.400382	1.11416	0.293475	-0.256061	-1.17342	0.193078	-0.492095	-1.50332	O08547	O08547	Vesicle-trafficking protein SEC22b
		27.5614	27.6834	27.6566	27.1696	27.7152	27.538	27.8643	27.9009	27.4006	27.5694	27.5288	27.6	27.3781	27.6491						19	19	17	50	50	NaN	NaN	0	NaN	6373300000	568	0.25296	0.132901	0.330788	0.881313	-0.0246793	-0.1571	0.0622388	-0.25499	-2.39193	0.906698	0.0181254	0.123266	0.137493	0.212185	1.76692	O08553;Q62188	O08553	Dihydropyrimidinase-related protein 2
		24.1251	23.58	23.8383	23.7568	24.1158	23.9252	23.8445	24.2551	24.0825	24.4951	23.8206	23.3224	23.9177	23.743						5	5	5	NaN	NaN	NaN	NaN	0	NaN	484160000	97	0.817906	0.567952	0.0356804	0.449049	0.164022	0.820914	0.642249	0.0975997	0.493987	0.206883	-0.307665	-1.44949	0.0979078	0.374088	2.03163	O08573-2;O08573-3;O08573	O08573-2;O08573-3;O08573	Galectin-9
		24.9878	24.338	24.9258	25.1504	24.6606	24.7815	24.1811	25.0209	24.7158	24.3683	24.7842	24.776	24.9099	24.5265						10	10	10	NaN	NaN	NaN	NaN	0	NaN	873220000	141	0.655291	0.72399	0.376708	0.643762	0.11302	0.49169	0.877095	-0.0382633	-0.162741	0.378522	0.22773	0.965755	0.752216	-0.0764465	-0.333601	O08579	O08579	Emerin
		23.2483	23.3434	22.9211	23.4306	23.3389	22.9727	23.6412	23.535	23.4352	23.5221	23.0037	23.3801	23.3826	23.5368						6	6	6	NaN	NaN	NaN	NaN	0	NaN	324130000	81	0.587366	0.349707	0.93045	0.214087	-0.197312	-1.42275	0.82349	-0.0516426	-0.235054	0.672002	-0.0844615	-0.449328	0.746784	-0.0612076	-0.341257	O08582	O08582	GTP-binding protein 1
		27.3365	27.4109	27.4453	27.4254	27.9586	27.6215	27.0972	28.0332	27.2411	27.2584	27.3396	27.6776	28.0745	27.6209						7	7	7	NaN	NaN	NaN	NaN	0	NaN	6016600000	289	0.968459	0.0226319	0.417449	0.0253595	-0.386478	-3.15068	0.177344	-0.397897	-1.56942	0.0216099	0.124816	3.29434	0.701316	-0.113398	-0.406317	O08583;O08583-2;Q9JJW6-2;Q9JJW6	O08583;O08583-2	THO complex subunit 4
		23.8221	24.4908	24.7153	23.7644	24.6218	24.8709	25.2915	22.9962	24.6756	25.0936	25.5113	24.0626	24.5719	24.5751						3	3	3	NaN	NaN	NaN	NaN	0	NaN	842370000	58	0.252523	0.665882	0.211916	0.545217	-0.205046	-0.648577	0.348965	0.648409	1.03298	0.0493966	-0.895369	-2.58059	0.947985	0.0419149	0.0685767	O08585	O08585	Clathrin light chain A
		23.0686	22.6574	22.4852	23.0124	23.18	22.0959	22.4622	22.7837	22.022	22.1892	22.4768	22.6759	22.3186	22.6298						5	5	5	NaN	NaN	NaN	NaN	0	NaN	217110000	29	0.0873546	0.851117	0.19526	0.224382	0.264487	1.38599	0.231894	-0.401102	-1.36015	0.0344015	0.576578	2.88463	0.770379	0.0890112	0.308169	O08663	O08663	Methionine aminopeptidase 2
		28.5388	28.5038	28.7101	28.0833	28.6494	28.5399	28.7801	29.2194	28.4572	28.2844	28.3944	28.3511	28.4485	28.3662						15	15	15	75	75	75	NaN	0	NaN	12255000000	438	0.0704462	0.129444	0.203927	0.677283	0.0704223	0.441511	0.0690923	-0.418529	-2.30785	0.643089	0.0803355	0.492711	0.0703494	0.408616	2.29341	O08709	O08709	Peroxiredoxin-6
		23.6759	23.469	23.4095	24.1596	23.4553	23.1066	23.4788	24.0055	23.4803	23.6807	23.6461	23.7809	24.3597	23.6269						4	4	4	NaN	NaN	NaN	NaN	0	NaN	393710000	50	0.368116	0.816937	0.200244	0.414976	-0.243976	-0.888478	0.703515	0.0908313	0.403127	0.729191	0.076158	0.366213	0.212892	-0.410966	-1.42713	O08734	O08734	Bcl-2 homologous antagonist/killer
		22.0436	22.4652	22.2641	22.2686	22.3438	22.4648	22.6752	22.623	22.367	22.462	22.0436	22.0083	22.2853	22.1875						3	3	3	NaN	NaN	NaN	NaN	0	NaN	178490000	22	0.0994692	0.317928	0.0575825	0.450973	0.100056	0.817217	0.149759	-0.235839	-1.70061	0.844213	-0.0304238	-0.206951	0.0223935	0.366319	3.2621	O08738	O08738	Caspase-6;Caspase-6 subunit p18;Caspase-6 subunit p11
		21.58	18.8763	21.5714	20.6931	21.3525	21.2549	22.0576	22.769	21.6664	19.2186	21.9492	21.116	22.9602	22.419						2	2	2	NaN	NaN	NaN	NaN	NaN	NaN	110690000	6	0.6484	0.0746642	0.973088	0.152776	-1.48488	-1.68514	0.324507	-0.91376	-1.09232	0.810298	-0.264545	-0.253058	0.641502	-0.306571	-0.495123	O08740	O08740	DNA-directed RNA polymerase II subunit RPB11
		26.3208	25.8772	26.4638	27.138	26.3655	26.2534	26.7362	26.4353	26.771	26.5239	26.7041	26.4657	26.5703	26.6751						12	12	12	NaN	NaN	NaN	NaN	0	NaN	2928100000	240	0.344337	0.806608	0.789634	0.71642	-0.120381	-0.384497	0.170867	0.218774	1.59831	0.522761	-0.216397	-0.686794	0.395789	-0.122758	-0.928444	O08749	O08749	Dihydrolipoyl dehydrogenase, mitochondrial
		25.4974	25.1328	25.4044	25.6404	25.4665	25.4521	25.4092	25.9904	25.2589	25.0922	25.6245	25.7135	25.847	25.6344						9	9	9	NaN	NaN	NaN	NaN	0	NaN	1439800000	186	0.819388	0.0569681	0.348979	0.0708772	-0.312902	-2.28742	0.278375	-0.254309	-1.21566	0.630274	0.0935032	0.512279	0.413892	-0.152096	-0.890697	O08756	O08756	3-hydroxyacyl-CoA dehydrogenase type-2
		27.9657	28.0422	28.0831	28.0908	28.1152	28.124	28.0399	27.9816	28.1798	28.1179	28.22	28.0645	28.151	28.1797						45	45	45	NaN	NaN	NaN	135	0	NaN	8615900000	797	0.0135338	0.849928	0.371444	0.110812	-0.0862943	-1.93476	0.0707777	0.107391	2.28855	0.029252	-0.127133	-3.02489	0.234462	-0.0665518	-1.3515	O08784	O08784	Treacle protein
		23.1722	22.8892	23.0365	22.769	22.998	23.3936	22.8772	23.5466	22.5471	23.442	23.2802	23.4428	23.1926	23.799						11	11	11	NaN	NaN	NaN	NaN	0	NaN	327430000	78	0.279625	0.109707	0.672641	0.0362402	-0.511377	-2.84015	0.716918	-0.11409	-0.383782	0.646918	-0.123011	-0.486906	0.302477	-0.274276	-1.14915	O08788-2;O08788	O08788-2;O08788	Dynactin subunit 1
		25.8781	26.4108	26.8451	26.3702	26.1245	26.55	26.6495	26.7996	26.9434	26.6603	26.8196	26.3602	27.0659	26.5409						12	12	12	NaN	NaN	NaN	NaN	0	NaN	2999400000	257	0.139525	0.894656	0.396692	0.384383	-0.279604	-0.952939	0.193971	0.276854	1.49973	0.1368	-0.431707	-1.77084	0.634242	-0.124752	-0.506198	O08795;O08795-2	O08795;O08795-2	Glucosidase 2 subunit beta
		26.7543	23.6135	27.3741	26.9397	27.1902	27.042	27.3392	27.8861	27.2687	27.1874	26.7972	27.081	27.5959	27.2442						5	4	4	NaN	NaN	NaN	NaN	0	NaN	4631800000	129	0.436861	0.168241	0.380099	0.319198	-1.13665	-1.1057	0.313113	-0.279914	-1.12128	0.414359	-0.914066	-0.88974	0.829249	0.0573284	0.227223	O08807	O08807	Peroxiredoxin-4
		26.9841	26.951	26.5218	27.0374	26.9312	26.9241	26.8762	26.8473	26.8195	26.6577	26.5509	26.8941	27.08	26.9666						26	25	25	NaN	NaN	NaN	NaN	0	NaN	3766600000	583	0.507555	0.107833	0.113065	0.501856	-0.106667	-0.723387	0.0254174	-0.218682	-3.14866	0.257935	0.197551	1.27625	0.154687	-0.085536	-1.6755	O08810	O08810	116 kDa U5 small nuclear ribonucleoprotein component
		20.634	21.7279	20.666	21.1932	21.4445	21.0109	21.0581	21.5588	21.1798	21.2527	20.9443	21.3903	21.9038	21.7081						3	2	2	NaN	NaN	NaN	NaN	0	NaN	79561000	33	0.240252	0.0865312	0.402203	0.122993	-0.612086	-1.85351	0.464657	-0.14246	-0.791255	0.832418	-0.0702964	-0.222921	0.108962	-0.39933	-1.94791	O08900;P81183-2;P81183;Q8C208-3;Q8C208-2;Q8C208;Q8C208-4	O08900	Zinc finger protein Aiolos
		23.1772	23.4142	22.8305	22.7258	23.0389	22.8106	22.7597	23.1769	22.5438	22.5833	22.461	23.1821	23.3427	23.0538						5	5	5	NaN	NaN	NaN	NaN	0	NaN	263640000	41	0.288914	0.071402	0.00897207	0.471029	-0.155969	-0.779358	0.0175656	-0.417127	-3.48493	0.044221	0.507551	2.6724	0.128226	-0.246393	-1.82111	O08914	O08914	Fatty-acid amide hydrolase 1
		24.008	24.0348	24.0589	24.0672	24.3119	24.2609	24.2549	24.3086	23.8826	23.634	24.0646	24.2232	23.693	24.0412						7	7	7	NaN	NaN	NaN	NaN	0	NaN	553100000	84	0.0172962	0.0441709	0.50543	0.684791	0.0564334	0.43045	0.0103294	-0.423684	-3.99942	0.145632	0.181843	1.72229	0.0724233	0.298274	2.27017	O08915	O08915	AH receptor-interacting protein
		23.2587	22.2785	24.0894	23.0249	22.8657	24.6368	24.2933	25.1451	23.8103	23.7171	23.904	23.0381	22.279	23.6863						4	4	4	NaN	NaN	NaN	NaN	0	NaN	458050000	49	0.482684	0.519275	0.0414008	0.783261	0.16174	0.290273	0.496986	-0.424751	-0.732063	0.204101	-0.647595	-1.46006	0.125329	1.23409	1.83888	O08997	O08997	Copper transport protein ATOX1
		19.7302	18.5427	19.1704	20.2853	18.9281	19.1872	18.6511	18.7686	20.4546	19.0655	18.6835	19.8428	19.1684	19.5505						1	1	1	5	5	5	NaN	0	NaN	14084000	9	0.384522	0.444824	0.339784	0.858666	-0.0883811	-0.187465	0.321683	0.517459	1.09941	0.962757	0.0309731	0.0490788	0.0306335	-0.636813	-2.9847	O09005	O09005	Sphingolipid delta(4)-desaturase DES1
		26.2023	26.3872	26.3203	24.7104	26.3412	26.3044	26.7299	26.4136	26.541	26.2932	25.9732	26.44	24.8809	26.4758						8	8	8	NaN	NaN	NaN	NaN	0	NaN	2553900000	127	0.82638	0.628833	0.219127	0.968093	-0.0271656	-0.0420407	0.365381	-0.178147	-0.995089	0.493327	-0.36407	-0.738621	0.308583	0.515052	1.13305	O09061	O09061	Proteasome subunit beta type-1
		25.384	25.5431	25.1622	25.4304	25.0643	25.4203	25.4875	25.3633	25.7294	25.609	25.3333	25.0542	25.9038	25.4309						9	9	7	NaN	NaN	NaN	NaN	0	NaN	1378500000	136	0.283391	0.628566	0.862071	0.728781	-0.0830116	-0.366798	0.190955	0.22338	1.51193	0.249844	-0.177286	-1.30144	0.604029	-0.129105	-0.553075	O09106	O09106	Histone deacetylase 1
		23.1904	23.1889	23.7391	24.2112	23.2406	23.9431	23.4237	23.4197	24.3749	24.0041	24.4912	23.683	23.1769	19.7854						2	2	2	NaN	NaN	NaN	NaN	0	NaN	368130000	15	0.602653	0.113497	0.0955483	0.255248	1.36731	1.28453	0.0154929	0.783322	3.60308	0.0755078	-0.707685	-2.2369	0.269047	1.29167	1.24279	O09111	O09111	NADH dehydrogenase [ubiquinone] 1 beta subcomplex subunit 11, mitochondrial
		20.4899	17.3915	20.2532	20.5568	18.9434	20.6056	21.1684	19.1331	21.0313	21.56	20.3838	19.4933	20.1906	18.5469						2	2	2	NaN	NaN	NaN	NaN	0	NaN	28330000	3	0.542055	0.413983	0.154358	0.800835	0.2626	0.266033	0.205439	1.02913	1.45496	0.222407	-1.31888	-1.39291	0.500133	0.552357	0.726451	O09117-2;O09117	O09117-2;O09117	Synaptophysin-like protein 1
		21.8674	21.5715	21.1429	21.0402	21.5162	21.0669	21.3304	21.8823	21.3105	21.4354	21.4757	21.2041	21.5368	21.4446						2	2	2	NaN	NaN	NaN	NaN	0	NaN	86577000	20	0.873306	0.903181	0.86528	0.96756	0.010348	0.0427435	0.848047	-0.0417577	-0.201772	0.994522	-0.00166829	-0.0072156	0.815839	0.053774	0.245485	O09130	O09130	NFATC2-interacting protein
		25.8695	26.165	25.2165	26.0222	25.6161	25.3585	25.6665	25.1005	25.2948	24.8511	25.1883	25.613	25.9228	25.5615						5	5	5	NaN	NaN	NaN	NaN	0	NaN	1502400000	39	0.204649	0.841979	0.0140095	0.671945	0.119198	0.449413	0.149928	-0.323993	-1.69973	0.0482927	0.706873	2.59926	0.204729	-0.263682	-1.45766	O09167	O09167	60S ribosomal protein L21
		20.6114	18.8603	20.5631	20.4842	20.6294	20.6875	20.8274	23.8402	20.6023	20.8	20.7188	20.4701	24.0506	20.7416						1	1	1	NaN	NaN	NaN	NaN	NaN	NaN	108400000	27	0.571494	0.11244	0.827552	0.19489	-1.62433	-1.49605	0.433529	-0.7891	-0.851186	0.303849	-0.57725	-1.14551	0.854456	-0.257985	-0.193132	O09172	O09172	Glutamate--cysteine ligase regulatory subunit
		19.8039	19.4701	18.9659	19.2857	20.0953	19.9235	19.9806	19.8383	19.6857	19.6045	19.0596	21.6804	20.5148	20.1519						2	2	2	13	13	13	NaN	0	NaN	28231000	6	0.0883146	0.00317049	0.14114	0.0240164	-1.40099	-3.19921	0.0342522	-0.509517	-2.88836	0.805943	-0.0685323	-0.259023	0.0892241	-0.822937	-2.10466	O35083	O35083	1-acyl-sn-glycerol-3-phosphate acyltransferase alpha
		18.8816	18.524	18.7564	19.541	18.4301	18.5966	18.5528	19.576	19.7104	20.8875	19.0353	18.2146	19.2006	18.5347						1	1	1	NaN	NaN	NaN	NaN	NaN	NaN	8221000	12	0.242676	0.0917223	0.126689	0.471659	0.275792	0.778188	0.104896	1.08885	1.97763	0.127307	-0.951952	-1.8267	0.740343	0.138897	0.350363	O35114	O35114	Lysosome membrane protein 2
		27.9061	27.5427	27.9269	28.615	27.9859	28.1028	27.7323	28.1026	28.1453	28.0275	28.2955	28.3668	28.2489	28.542						14	14	14	NaN	NaN	NaN	NaN	0	NaN	8697900000	516	0.0900019	0.562915	0.430608	0.216131	-0.388228	-1.41532	0.210506	0.175211	1.43593	0.586493	-0.158431	-0.580922	0.0232861	-0.405008	-3.2269	O35129	O35129	Prohibitin-2
		22.7733	22.9475	22.2075	22.9771	23.1527	22.7838	22.3769	22.2036	21.6881	22.0415	22.4974	23.1282	22.5236	22.719						4	4	4	NaN	NaN	NaN	NaN	0	NaN	201910000	46	0.260661	0.24542	0.0763036	0.814604	-0.0639364	-0.247172	0.143152	-0.553572	-1.73561	0.0736314	0.650669	2.25696	0.605577	-0.161034	-0.55064	O35130	O35130	Ribosomal RNA small subunit methyltransferase NEP1
		19.8355	22.2249	20.977	18.0933	19.5638	21.3258	21.2248	20.8394	19.0928	21.8093	21.3441	21.5143	21.8368	21.1956						2	2	2	NaN	NaN	NaN	NaN	0	NaN	66953000	23	0.379158	0.398962	0.82257	0.293266	-1.23288	-1.174	0.990812	0.0102871	0.0121024	0.725275	-0.466071	-0.371804	0.183726	-0.777096	-1.54195	O35144-2;O35144	O35144-2;O35144	Telomeric repeat-binding factor 2
		22.2491	19.3259	22.3317	22.5322	22.194	22.2958	22.3254	22.0667	22.6438	22.438	22.3541	22.3525	22.4278	22.4881						1	1	1	NaN	NaN	NaN	NaN	NaN	NaN	147560000	7	0.26618	0.486727	0.480478	0.409695	-0.81308	-0.899332	0.0491236	0.258154	2.58517	0.381748	-0.868912	-0.958681	0.0458574	-0.202322	-2.64215	O35166	O35166	Golgi SNAP receptor complex member 2
		25.5119	25.89	25.9776	25.2982	26.059	26.1236	26.3295	26.2456	25.4718	26.3182	25.9037	26.1006	25.8462	25.8412						7	7	7	NaN	NaN	NaN	NaN	0	NaN	1968200000	222	0.917009	0.0602068	0.13026	0.254896	-0.259898	-1.28562	0.236206	-0.291565	-1.34567	0.449332	-0.228424	-0.820371	0.0503589	0.260091	2.56469	O35215	O35215	D-dopachrome decarboxylase
		24.2559	23.9814	24.7888	24.2944	25.1755	23.8929	24.5442	24.919	23.7744	23.5948	22.7714	24.2272	24.7289	24.7954						7	7	7	NaN	NaN	NaN	NaN	0	NaN	701940000	46	0.0675219	0.0170637	0.0942582	0.355121	-0.253712	-1.0186	0.0304241	-1.25266	-2.99066	0.033249	0.94991	2.91389	0.897591	0.0490392	0.135382	O35218	O35218	Cleavage and polyadenylation specificity factor subunit 2
		24.4563	24.6484	24.4703	24.4755	24.7892	24.474	24.428	24.2804	24.2503	23.9107	24.2881	24.6603	24.7293	24.6749						8	8	2	NaN	NaN	NaN	NaN	0	NaN	730810000	141	0.350682	0.0269552	0.00858502	0.0267851	-0.175535	-3.10224	0.0871528	-0.343192	-2.12319	0.0243735	0.362914	3.18602	0.187329	-0.195257	-1.52685	O35226-3;O35226-2;O35226-5	O35226-3;O35226-2;O35226-5	26S proteasome non-ATPase regulatory subunit 4
		26.4857	26.6529	26.2038	26.3233	26.0291	26.3835	26.6298	26.6942	26.6143	26.6649	26.4326	26.049	26.6315	26.1829						26	26	26	NaN	NaN	NaN	NaN	0	NaN	2798700000	294	0.977078	0.417277	0.283653	0.522823	0.128625	0.686688	0.500123	0.136439	0.726469	0.288366	-0.15417	-1.18749	0.55471	0.146356	0.632735	O35286	O35286	Pre-mRNA-splicing factor ATP-dependent RNA helicase DHX15
		25.2648	25.6373	25.4197	25.0559	25.1386	24.7492	24.9206	25.4286	25.1305	25.2326	25.6076	25.6273	25.3942	25.2294						7	7	7	NaN	NaN	NaN	NaN	0	NaN	1184200000	109	0.247697	0.386551	0.19771	0.69492	-0.0725217	-0.415624	0.267198	0.264303	1.24827	0.916485	0.0208774	0.11027	0.131531	-0.357702	-1.80133	O35295	O35295	Transcriptional activator protein Pur-beta
		23.4214	23.6393	23.504	23.3965	23.6465	23.6426	23.288	23.5292	23.1651	23.421	23.3811	23.3889	23.4057	23.6228						6	6	6	NaN	NaN	NaN	NaN	0	NaN	376740000	88	0.169476	0.278318	0.465382	0.851436	0.017817	0.197201	0.148601	-0.204182	-1.70663	0.130303	0.167893	1.80862	0.665103	0.0541058	0.459589	O35309	O35309	N-myc-interactor
		25.7776	25.6457	25.7667	25.4964	25.7575	25.8948	25.7435	26.7763	25.7955	25.6943	25.7677	25.8091	26.3575	25.4998						9	8	8	NaN	NaN	NaN	NaN	0	NaN	1853300000	213	0.846447	0.168823	0.538013	0.37618	-0.217227	-0.97092	0.367131	-0.290511	-0.991133	0.36699	-0.0809261	-0.991449	0.685884	0.15421	0.428846	O35326	O35326	Serine/arginine-rich splicing factor 5
		24.4824	23.9345	24.124	24.3801	24.2052	23.8579	24.0115	23.8624	23.8895	23.6661	23.723	24.2107	24.0508	24.1904						6	6	4	NaN	NaN	NaN	NaN	0	NaN	538750000	53	0.139024	0.778687	0.00717888	0.62443	0.0796135	0.521277	0.100849	-0.22474	-2.00843	0.0302666	0.470751	2.99518	0.175801	-0.166398	-1.57621	O35343	O35343	Importin subunit alpha-3
		20.2187	20.3956	20.1797	20.2259	20.3751	20.534	20.6788	20.1107	20.471	20.8351	20.4608	20.7193	20.0189	20.2986						4	2	2	NaN	4	4	NaN	NaN	NaN	44153000	19	0.335725	0.954173	0.132329	0.63517	-0.0906056	-0.504778	0.395806	0.164316	0.928409	0.0362233	-0.333992	-2.84054	0.737345	0.0790703	0.354615	O35344	O35344	Importin subunit alpha-4
		19.5577	19.7744	19.7184	18.295	20.6912	19.3898	19.9727	20.4222	19.343	19.6434	19.8779	19.7886	20.8402	19.4208						3	3	3	NaN	NaN	NaN	NaN	0	NaN	25399000	5	0.785954	0.0861637	0.567013	0.268169	-0.680151	-1.24539	0.226463	-0.497542	-1.37875	0.540382	-0.285053	-0.656715	0.842639	0.102444	0.209078	O35345;Q60960	O35345;Q60960	Importin subunit alpha-7;Importin subunit alpha-5;Importin subunit alpha-5, N-terminally processed
		26.9988	27.0047	26.7054	26.759	26.5916	26.6697	26.8379	27.008	26.6088	26.7042	26.4382	26.3763	26.9719	26.5319						29	29	29	NaN	NaN	NaN	NaN	0	NaN	3403900000	474	0.0739521	0.764063	0.553396	0.229963	0.240309	1.36672	0.190344	-0.193034	-1.51442	0.0548056	0.283263	2.49528	0.454413	0.150081	0.810637	O35350	O35350	Calpain-1 catalytic subunit
		29.2898	29.0664	29.2573	28.6343	29.2216	29.2119	29.1928	28.8592	28.9956	28.8038	28.7781	28.9415	28.6856	29.0146						14	14	11	NaN	NaN	NaN	NaN	0	NaN	16976000000	735	0.0824884	0.712625	0.871931	0.399425	0.181402	0.920754	0.0777964	-0.262201	-2.21314	0.328746	0.20279	1.08177	0.130139	0.240813	1.8096	O35381;Q64G17	O35381	Acidic leucine-rich nuclear phosphoprotein 32 family member A
		23.1789	23.8914	22.4475	24.6069	23.5339	23.127	24.1957	23.3127	23.6832	23.8009	22.8712	23.8031	24.0971	24.1966						4	4	4	NaN	NaN	NaN	NaN	0	NaN	479850000	50	0.553012	0.458595	0.414567	0.410367	-0.501074	-0.897944	0.815764	-0.0905294	-0.245586	0.900115	0.0793691	0.132021	0.155384	-0.489914	-1.67201	O35405	O35405	Phospholipase D3
		22.1889	19.4147	21.7706	22.6941	21.9413	21.6781	21.7674	21.2786	22.174	19.7671	21.6755	22.6657	21.7302	22.4329						3	3	3	NaN	NaN	NaN	NaN	0	NaN	112760000	21	0.790603	0.338561	0.419322	0.432793	-0.75918	-0.852641	0.501056	-0.460789	-0.724809	0.779725	0.311551	0.295175	0.0876968	-0.609942	-2.11828	O35459	O35459	Delta(3,5)-Delta(2,4)-dienoyl-CoA isomerase, mitochondrial
		20.9158	20.7161	20.1073	20.9539	20.7119	20.5707	20.4282	21.04	20.5667	20.4737	20.3008	20.7739	20.8538	20.7552						2	2	2	NaN	NaN	NaN	NaN	0	NaN	52351000	30	0.686137	0.295114	0.273557	0.625471	-0.121077	-0.519671	0.211686	-0.240611	-1.43157	0.390343	0.226185	0.940068	0.527058	-0.10665	-0.679397	O35465;O35465-2	O35465;O35465-2	Peptidyl-prolyl cis-trans isomerase FKBP8
		25.9271	26.5434	26.0459	25.7312	26.2701	25.8262	25.4393	21.618	26.2482	26.3711	26.1473	26.4433	24.7356	26.0249						5	5	5	NaN	NaN	NaN	NaN	0	NaN	1921000000	122	0.419622	0.186268	0.590598	0.522456	0.327347	0.687321	0.299391	1.46714	1.1574	0.402748	-0.193617	-0.913776	0.510891	-0.946178	-0.707446	P28076;O35522	P28076;O35522	Proteasome subunit beta type-9
		24.4512	24.6177	24.6562	24.8405	24.4705	24.8015	24.6195	24.6287	24.5953	24.7329	24.9526	24.6197	24.839	24.7437						3	3	3	NaN	NaN	NaN	NaN	0	NaN	808280000	74	0.1949	0.828485	0.928452	0.431453	-0.0927485	-0.855295	0.321186	0.130178	1.10067	0.397508	-0.118851	-0.924801	0.32816	-0.104076	-1.08322	O35593	O35593	26S proteasome non-ATPase regulatory subunit 14
		21.2448	20.7579	20.9403	21.1251	21.4638	21.2054	20.8219	20.6824	21.2459	21.2085	21.2431	21.2913	20.9272	21.1817						3	3	3	NaN	NaN	NaN	NaN	0	NaN	64806000	25	0.27121	0.837049	0.642634	0.487075	-0.116363	-0.749908	0.412171	0.189088	0.89423	0.149596	-0.215466	-1.70146	0.711361	-0.0899851	-0.391782	O35598	O35598	Disintegrin and metalloproteinase domain-containing protein 10
		24.1044	24.3716	23.8041	24.6827	24.0705	23.9937	23.942	23.8422	24.2771	24.3834	24.0876	24.0847	24.2848	24.4966						5	5	5	NaN	NaN	NaN	NaN	0	NaN	529470000	97	0.22602	0.294376	0.249262	0.851124	-0.0480399	-0.197621	0.0260981	0.287266	3.12521	0.97172	-0.00869258	-0.0372589	0.0357265	-0.326613	-2.85232	O35609	O35609	Secretory carrier-associated membrane protein 3
		23.322	23.2691	22.8595	22.925	22.7188	23.1534	23.3649	23.3305	22.8759	23.041	23.0592	22.8891	22.9698	23.0655						5	5	3	NaN	NaN	NaN	NaN	0	NaN	277820000	46	0.275791	0.865555	0.785655	0.450696	0.119082	0.81775	0.448352	-0.149885	-0.822257	0.520517	0.101894	0.690673	0.397718	0.167073	0.924359	O35638	O35638	Cohesin subunit SA-2
		26.1586	26.2072	25.9625	25.8333	25.8703	25.9421	26.2028	26.34	26.2466	26.5869	25.8711	25.8437	26.0844	25.9828						24	24	11	31	31	NaN	NaN	0	NaN	2055100000	294	0.764402	0.498616	0.233321	0.57931	0.0700825	0.592474	0.529806	0.146067	0.674689	0.378246	-0.194475	-0.966363	0.444166	0.118491	0.830353	O35643	O35643	AP-1 complex subunit beta-1
		17.1059	19.2548	19.6729	19.2676	19.2145	19.6424	19.75	19.4963	20.1807	18.8456	19.4628	19.8744	18.7615	19.247						1	1	1	3	3	3	NaN	NaN	NaN	16609000	1	0.602635	0.456247	0.295576	0.553429	-0.468985	-0.634862	0.936488	-0.0293843	-0.0837728	0.417525	-0.671082	-0.883279	0.478672	0.231481	0.765242	O35654	O35654	DNA polymerase delta subunit 2
		26.0499	25.4907	26.1474	26.1999	26.232	26.112	25.8789	26.1155	25.8323	26.0188	26.2979	26.2811	26.354	26.5128						6	6	6	NaN	NaN	NaN	NaN	0	NaN	2280500000	280	0.159551	0.121465	0.393791	0.0972562	-0.410687	-2.03687	0.816893	-0.0349277	-0.244046	0.742812	-0.0777094	-0.346868	0.0358771	-0.29805	-2.84873	O35658	O35658	Complement component 1 Q subcomponent-binding protein, mitochondrial
		24.4791	24.9337	25.1476	24.6523	25.2359	24.9164	25.2144	25.5507	24.7693	25.0578	24.9986	24.921	25.1125	24.9667						10	10	10	NaN	NaN	NaN	NaN	0	NaN	1055800000	115	0.723458	0.05436	0.170189	0.328446	-0.196851	-1.08251	0.151743	-0.287471	-1.6904	0.49846	-0.138688	-0.72943	0.213054	0.229307	1.42653	O35685	O35685	Nuclear migration protein nudC
		24.9526	24.9664	25.0814	25.1615	25.0603	25.3753	24.9461	25.8497	25.0911	24.9432	25.2788	25.0912	26.0028	25.1909						16	16	16	NaN	NaN	NaN	NaN	0	NaN	1194200000	144	0.614252	0.127318	0.876443	0.179443	-0.387835	-1.56028	0.457056	-0.203488	-0.805606	0.551722	-0.0639095	-0.637702	0.737557	-0.120437	-0.354313	O35691	O35691	Pinin
		26.2341	26.1911	26.4918	26.2358	26.351	26.5958	26.1757	26.4544	26.3584	26.2923	26.385	26.3939	26.4989	26.3724						12	10	6	NaN	NaN	NaN	NaN	0	NaN	2672500000	261	0.554704	0.202577	0.835091	0.187711	-0.13356	-1.52526	0.666737	-0.0489831	-0.457153	0.529111	-0.0570726	-0.675877	0.811883	-0.0275041	-0.25089	O35737	O35737	Heterogeneous nuclear ribonucleoprotein H;Heterogeneous nuclear ribonucleoprotein H, N-terminally processed
		25.9893	25.9362	26.074	25.7122	25.8576	25.9773	25.9521	26.2088	25.9555	25.8217	26.0119	25.7549	26.3464	25.9293						13	13	13	NaN	NaN	NaN	NaN	0	NaN	2003800000	209	0.94932	0.46516	0.963206	0.654383	-0.0822792	-0.475643	0.519569	-0.0692557	-0.692316	0.986825	-0.00178591	-0.0173548	0.950235	-0.0112376	-0.0656048	O35841	O35841	Apoptosis inhibitor 5
		24.5377	23.95	24.1348	24.4048	24.6004	24.1179	24.5529	24.6958	24.016	23.9099	24.5671	24.4447	24.3915	24.525						6	6	6	NaN	NaN	NaN	NaN	0	NaN	643710000	85	0.649274	0.0904251	0.848626	0.272692	-0.196872	-1.23209	0.210611	-0.327422	-1.43554	0.705652	0.09255	0.400031	0.816086	0.0379999	0.245148	O35855	O35855	Branched-chain-amino-acid aminotransferase, mitochondrial
		24.9899	21.9633	23.1881	21.8157	22.5888	22.8192	22.4698	23.1194	24.0352	22.6761	22.7674	22.9388	23.0801	22.8461						5	5	5	NaN	NaN	NaN	NaN	0	NaN	309030000	26	0.70348	0.646219	0.971329	0.970139	0.0342606	0.0393431	0.356548	0.410327	1.0153	0.863781	-0.170344	-0.18059	0.301529	-0.205722	-1.15168	O35857	O35857	Mitochondrial import inner membrane translocase subunit TIM44
		23.5984	23.6466	23.9999	23.7026	23.4616	23.5914	23.548	22.6464	23.5306	23.6211	24.191	23.4997	24.2845	23.512						4	4	4	NaN	NaN	NaN	NaN	0	NaN	397090000	64	0.239672	0.233862	0.327735	0.91083	-0.0285002	-0.117776	0.197765	0.469054	1.48464	0.837041	-0.0440299	-0.216653	0.242344	-0.453525	-1.32548	O35864	O35864	COP9 signalosome complex subunit 5
		25.6399	25.7284	26.499	26.0193	25.8602	26.3476	26.0868	26.3698	26.2652	25.6083	26.4379	25.9568	26.3431	26.0316						14	14	14	NaN	NaN	NaN	NaN	0	175	2213700000	199	0.834391	0.532979	0.610148	0.601765	-0.138875	-0.556643	0.816666	-0.0623142	-0.244356	0.689176	-0.132162	-0.424019	0.761659	0.0556016	0.320348	O35887	O35887	Calumenin
		26.948	26.8313	26.7131	27.0016	26.4408	26.6321	26.8957	26.8385	27.2199	26.9025	26.8098	26.6249	27.2929	26.7594						14	14	10	NaN	NaN	NaN	NaN	0	NaN	3660800000	427	0.259772	0.295822	0.732315	0.923431	-0.0188789	-0.101059	0.147273	0.275639	1.7136	0.456208	-0.1039	-0.807217	0.406178	-0.190618	-0.90662	O35892;O35892-2	O35892;O35892-2	Nuclear autoantigen Sp-100
		25.0919	25.4507	24.9863	24.9692	25.5468	25.2801	25.4254	25.5773	25.3366	25.15	24.8769	25.3073	25.6794	25.1615						4	4	4	NaN	NaN	NaN	NaN	0	NaN	1214100000	189	0.741836	0.0242623	0.763238	0.221636	-0.25819	-1.39563	0.058085	-0.336233	-2.44792	0.985304	0.00335598	0.0193586	0.643514	0.0746867	0.492065	O35900	O35900	U6 snRNA-associated Sm-like protein LSm2
		22.052	21.0625	21.7562	21.417	22.8888	21.5108	22.3168	21.8095	20.1962	21.2248	21.6844	22.4037	21.5953	23.0819						4	4	4	NaN	NaN	NaN	NaN	0	NaN	142750000	23	0.658341	0.0241274	0.283663	0.13282	-0.788399	-1.79376	0.0857586	-1.09634	-2.13592	0.283186	0.536772	1.20199	0.670743	-0.228831	-0.451196	O35904;O35904-2	O35904	Phosphatidylinositol 4,5-bisphosphate 3-kinase catalytic subunit delta isoform
		21.5612	21.584	21.984	22.0477	22.3047	21.9663	22.4067	22.2443	22.7122	20.5121	21.7892	21.8519	22.2644	22.2119						2	2	2	NaN	NaN	NaN	NaN	NaN	NaN	132890000	23	0.68077	0.156405	0.997327	0.152661	-0.315143	-1.68572	0.351967	-0.559328	-1.02594	0.833254	0.123082	0.221786	0.471456	0.121103	0.778566	O35943	O35943	Frataxin, mitochondrial;Frataxin intermediate form;Frataxin mature form
		21.1456	21.0896	20.8317	20.9924	21.4438	20.7861	21.5858	21.5583	20.2113	20.4405	21.0612	21.0815	20.7069	20.9358						3	3	3	NaN	NaN	NaN	NaN	0	NaN	69617000	17	0.0241167	0.0701298	0.980319	0.422341	0.106764	0.873524	0.0538614	-0.772512	-2.50949	0.108479	0.443827	1.95137	0.130314	0.435449	1.80856	O35954	O35954	Membrane-associated phosphatidylinositol transfer protein 1
		26.3691	26.6007	26.5732	26.1795	26.4139	26.4873	26.6521	26.2807	25.5151	27.2315	26.3932	26.2241	25.9283	26.3283						7	7	7	NaN	NaN	NaN	NaN	0	163	2721300000	240	0.457481	0.733468	0.595487	0.138653	0.27041	1.7604	0.860494	-0.0785508	-0.185007	0.910878	0.0506883	0.117712	0.0794476	0.298272	2.19646	O35955	O35955	Proteasome subunit beta type-10
		20.4837	19.7555	19.8056	20.5192	20.2259	19.7645	20.24	19.9714	20.1562	20.5813	18.7897	20.1657	19.645	19.9332						3	3	3	NaN	NaN	NaN	NaN	0	NaN	31171000	28	0.445524	0.940227	0.772131	0.450881	0.226422	0.817394	0.677621	-0.208044	-0.441012	0.587239	0.298623	0.579727	0.493988	0.135842	0.737434	O35972	O35972	39S ribosomal protein L23, mitochondrial
		24.5623	23.2605	21.1874	25.2233	26.3701	22.3497	22.0932	22.3127	20.7979	21.7787	21.563	25.3086	20.9479	24.364						3	3	3	NaN	NaN	NaN	NaN	0	NaN	816630000	15	0.353076	0.449612	0.244554	0.990951	0.0182145	0.0119196	0.187267	-1.90154	-1.5271	0.100036	2.1785	2.01477	0.881396	-0.258746	-0.156989	O54774	O54774	AP-3 complex subunit delta-1
		24.2005	24.6227	24.4884	23.8009	24.4807	24.3107	24.3108	25.0834	24.5053	24.1824	24.3013	24.2789	24.7632	24.2269						7	7	7	NaN	NaN	NaN	NaN	0	NaN	672120000	109	0.8398	0.285863	0.624532	0.599033	-0.14486	-0.560958	0.391047	-0.216737	-0.938558	0.830972	-0.051527	-0.224884	0.654854	0.123404	0.474935	O54786;O54786-2	O54786	DNA fragmentation factor subunit alpha
		22.6143	22.5599	22.1686	22.5505	22.5006	22.1222	22.4954	22.5861	22.0834	22.1006	22.4031	22.6818	22.1946	22.5542						4	4	4	16	16	16	NaN	0	NaN	169380000	33	0.343861	0.427219	0.180906	0.9844	-0.00353638	-0.0205497	0.185291	-0.230397	-1.53535	0.121904	0.277629	1.86043	0.780731	-0.0507685	-0.293779	O54788	O54788	DNA fragmentation factor subunit beta
		28.3586	28.4809	28.4011	28.0071	28.461	28.2495	28.5228	28.6816	28.2685	28.3042	28.0226	27.9284	28.2993	28.1948						28	28	28	NaN	NaN	NaN	NaN	0	NaN	10036000000	1019	0.0489201	0.494746	0.291215	0.318724	0.171081	1.10691	0.0821086	-0.280278	-2.17033	0.46742	0.113465	0.786082	0.0612016	0.337894	2.40552	O54824-2;O54824	O54824-2;O54824	Pro-interleukin-16;Interleukin-16
		22.1081	22.1687	21.9176	22.2711	21.8051	22.0063	22.4515	22.7195	22.2017	22.3433	21.9912	22.1487	22.5562	22.2432						4	4	4	NaN	NaN	NaN	NaN	0	NaN	146850000	41	0.660574	0.382444	0.978646	0.200428	-0.199661	-1.47422	0.807573	-0.0668604	-0.256789	0.632882	-0.062373	-0.50828	0.802194	-0.0704274	-0.264167	O54833	O54833	Casein kinase II subunit alpha
		22.7508	23.1241	23.3798	23.1626	23.3521	23.4225	23.3302	23.771	23.4376	22.8854	22.8977	24.235	23.5711	23.4087						2	2	2	13	13	13	NaN	0	NaN	323270000	27	0.481612	0.0121726	0.379468	0.0600675	-0.633962	-2.42067	0.0981086	-0.395406	-2.03002	0.892723	0.0307816	0.141868	0.319617	-0.269338	-1.10464	O54879	O54879	High mobility group protein B3
		19.4626	18.0017	20.0174	19.0474	19.5449	19.3528	19.7327	19.324	19.1887	19.0754	19.1522	18.9878	19.8452	19.7145						1	1	1	NaN	NaN	NaN	NaN	NaN	NaN	14777000	14	0.953435	0.21944	0.971356	0.517567	-0.38356	-0.695791	0.0294021	-0.349833	-3.02042	0.990234	-0.0064942	-0.0128636	0.917445	-0.0272328	-0.108996	O54890	O54890	Integrin beta-3
		21.0319	21.0903	21.2746	18.3984	21.0437	21.2753	21.0735	19.5206	21.0418	20.9778	21.4776	20.8707	20.5453	22.0174						3	3	3	NaN	NaN	NaN	NaN	0	NaN	60918000	20	0.293623	0.772048	0.774634	0.471147	-0.695687	-0.779138	0.419772	0.437464	0.878717	0.422781	-0.716948	-0.872636	0.524299	-0.416203	-0.684142	O54916-3;O54916-4;O54916;O54916-2;Q80XA6	O54916-3;O54916-4;O54916	RalBP1-associated Eps domain-containing protein 1
		21.6036	21.5878	22.0899	19.4716	21.4068	21.923	21.7904	22.2978	22.1237	21.6847	21.7714	21.7158	21.9128	21.8252						1	1	1	10	10	10	NaN	NaN	NaN	106360000	32	0.407524	0.341901	0.357723	0.404934	-0.629719	-0.909209	0.983211	0.00541496	0.0221162	0.381364	-0.671689	-0.95952	0.876062	0.036555	0.164124	O54918-3;O54918-2;O54918	O54918-3;O54918-2;O54918	Bcl-2-like protein 11
		24.7141	24.868	25.1674	24.71	24.6538	24.9875	24.7119	25.1613	24.8852	24.9211	25.0633	24.5701	25.1758	24.9342						11	11	11	27	27	27	NaN	0	NaN	975660000	185	0.672591	0.877021	0.75964	0.889195	-0.0285061	-0.146573	0.621311	0.0778926	0.526099	0.527186	-0.0916298	-0.679178	0.945045	-0.0147689	-0.07246	O54941	O54941	SWI/SNF-related matrix-associated actin-dependent regulator of chromatin subfamily E member 1
		22.4128	22.7074	22.8563	23.468	22.4605	23.1936	21.7685	23.3209	22.7582	22.7287	23.3054	22.811	23.6556	23.1626						4	4	4	14	14	14	NaN	0	NaN	285950000	57	0.31662	0.945832	0.438592	0.343665	-0.348612	-1.04553	0.61249	0.244903	0.539812	0.829087	-0.069653	-0.227443	0.31798	-0.523861	-1.1088	O54946;O54946-2;Q9QYI5-2;Q9QYI5;Q9QYI8	O54946;O54946-2	DnaJ homolog subfamily B member 6
		21.7798	20.2758	21.3508	22.2046	22.0184	21.8203	22.4154	21.0921	20.8473	21.9633	21.6061	22.5339	21.1867	22.1597						3	3	3	NaN	NaN	NaN	NaN	0	NaN	112920000	16	0.797491	0.235957	0.942581	0.391216	-0.557353	-0.938195	0.433758	-0.364353	-0.850732	0.90646	-0.0694553	-0.123582	0.802964	-0.123544	-0.26311	O54950	O54950	5-AMP-activated protein kinase subunit gamma-1
		22.0065	21.5828	22.1372	21.8304	21.9826	22.2539	21.9659	21.7861	21.7093	22.0326	21.5681	22.1258	22.251	22.0867						3	3	3	NaN	NaN	NaN	NaN	0	NaN	129460000	52	0.865469	0.0635298	0.235991	0.1327	-0.265265	-1.79446	0.219916	-0.227138	-1.40174	0.542799	0.119211	0.652641	0.251658	-0.157338	-1.29573	O54957	O54957	Linker for activation of T-cells family member 1
		25.6421	25.4503	26.7982	25.9538	25.6595	26.6879	26.2604	27.3785	27.0028	26.5503	26.5871	26.4793	26.7317	26.0341						5	5	5	NaN	NaN	NaN	NaN	0	NaN	3294100000	289	0.284138	0.557195	0.189726	0.298536	-0.453893	-1.1597	0.646694	0.216814	0.487245	0.099483	-0.752271	-2.01911	0.866464	0.0815639	0.176987	O54962	O54962	Barrier-to-autointegration factor;Barrier-to-autointegration factor, N-terminally processed
		23.1809	23.2661	22.9519	22.9334	23.0607	23.1921	23.3298	23.1041	23.3717	23.0163	22.9053	23.1907	22.7734	23.1424						4	4	4	NaN	NaN	NaN	NaN	0	NaN	278130000	46	0.560072	0.815145	0.471252	0.760393	0.0475645	0.322121	0.613008	-0.0738804	-0.539003	0.927311	-0.0147041	-0.0959193	0.345397	0.136149	1.04141	O54984	O54984	ATPase Asna1
		21.2063	18.6576	21.353	18.4608	21.6514	21.3823	21.7748	22.063	19.0025	19.2225	21.6923	21.4192	17.7347	21.2438						6	5	5	NaN	NaN	NaN	NaN	0	NaN	70046000	26	0.348181	0.185152	0.317362	0.882393	-0.21314	-0.155656	0.0649964	-1.74543	-2.35695	0.965829	-0.0530364	-0.0450262	0.180065	1.58533	1.55759	O54988-2;O54988	O54988-2;O54988	STE20-like serine/threonine-protein kinase
		22.1615	22.3869	22.5677	22.7835	22.3395	22.4687	22.6709	23.0926	22.7436	22.5776	22.2573	22.303	22.7562	22.878						4	4	4	NaN	NaN	NaN	NaN	NaN	NaN	181920000	14	0.866441	0.364597	0.880141	0.461469	-0.170808	-0.797252	0.631189	-0.116753	-0.510875	0.804921	-0.0512571	-0.260425	0.991283	-0.00279824	-0.0114821	O55013	O55013	Trafficking protein particle complex subunit 3
		23.8893	23.8106	24.3485	24.4895	23.771	24.3363	24.1103	24.3322	24.1853	23.8624	24.3398	24.1395	24.4952	24.2637						6	6	5	NaN	NaN	NaN	NaN	0	NaN	593200000	121	0.603737	0.617109	0.579872	0.480522	-0.164991	-0.761849	0.968112	-0.00825834	-0.042016	0.982562	0.00529575	0.0229714	0.409205	-0.162028	-0.900343	O55022	O55022	Membrane-associated progesterone receptor component 1
		26.437	26.8368	26.7811	26.4088	26.4887	26.9207	27.2079	27.4473	26.8077	27.2315	26.798	26.5828	27.0791	26.5457						12	12	12	NaN	NaN	NaN	NaN	0	NaN	3713800000	261	0.885298	0.421915	0.0984187	0.56678	-0.119946	-0.612842	0.805841	-0.0704004	-0.259163	0.124123	-0.329823	-1.84639	0.36774	0.280277	0.98976	O55023	O55023	Inositol monophosphatase 1
		25.4547	25.6518	25.1607	25.3973	25.4479	25.3772	25.5529	25.7282	25.2559	25.5116	25.2736	25.4173	25.7145	25.6241						20	20	20	NaN	NaN	NaN	NaN	0	NaN	1391900000	288	0.955434	0.0943073	0.495186	0.282241	-0.169179	-1.20466	0.174875	-0.179529	-1.58031	0.63795	0.069109	0.500532	0.63535	-0.0587584	-0.504502	O55029	O55029	Coatomer subunit beta
		27.0511	27.0495	27.084	26.8722	27.3399	27.2296	27.2353	27.0925	27.0663	27.178	27.1969	26.9707	27.6526	27.2685						15	15	14	NaN	NaN	NaN	NaN	0	NaN	4191800000	177	0.298728	0.0752437	0.756049	0.165935	-0.28307	-1.62104	0.313834	-0.0772584	-1.11942	0.101124	-0.132885	-2.00629	0.6953	-0.0729262	-0.41507	O55098	O55098	Serine/threonine-protein kinase 10
		25.4139	25.2632	25.0029	25.4413	25.2855	25.1646	25.1714	25.1259	25.2684	25.196	25.1385	25.2994	25.3593	25.4738						18	18	18	NaN	NaN	NaN	NaN	0	NaN	1200000000	256	0.433508	0.748438	0.0758987	0.476468	-0.0971634	-0.769295	0.794727	0.0141037	0.274437	0.547031	0.0793459	0.645536	0.0232374	-0.190613	-3.22878	O55106	O55106	Striatin
		22.2519	22.1068	22.4784	23.3344	22.8138	22.7512	22.4138	20.3371	22.0527	22.1305	23.135	23.0595	20.9276	23.1279						2	2	2	NaN	NaN	NaN	NaN	0	NaN	190820000	21	0.856432	0.572701	0.705618	0.81289	0.171214	0.249514	0.652612	0.360416	0.478309	0.822061	0.103489	0.237	0.763447	-0.292691	-0.317847	O55126	O55126	Protein NipSnap homolog 2
		24.8178	24.8725	25.2425	24.9411	24.4807	25.1381	24.2466	24.1969	25.172	24.9475	25.1546	24.3149	24.1255	24.7496						7	7	7	NaN	NaN	NaN	NaN	0	NaN	840150000	58	0.990387	0.00613913	0.474249	0.0302911	0.571808	2.99447	0.0803338	0.575825	2.18766	0.37874	-0.122907	-0.965275	0.707519	0.11889	0.39733	O55128	O55128	Histone deacetylase complex subunit SAP18
		24.1886	24.0639	24.5017	24.2266	24.9311	24.7105	25.1181	24.5114	24.5879	24.8393	24.4755	24.8065	24.3174	24.6483						6	6	6	NaN	NaN	NaN	NaN	0	NaN	769730000	155	0.519356	0.027905	0.0294109	0.0870117	-0.345562	-2.12447	0.35478	-0.183525	-1.01939	0.0403313	-0.389045	-2.74956	0.301512	0.227008	1.15173	O55135	O55135	Eukaryotic translation initiation factor 6
		26.1551	26.2036	25.8847	26.1565	26.1931	26.2495	26.4521	25.5818	26.6959	26.3889	26.4069	26.1075	25.9168	26.2616						5	5	5	NaN	NaN	NaN	NaN	0	NaN	2192100000	168	0.189934	0.247766	0.143833	0.970469	0.00465997	0.0389088	0.171518	0.378097	1.59536	0.020988	-0.397287	-3.32088	0.923774	0.0238498	0.100604	O55142	O55142	60S ribosomal protein L35a
		22.6982	22.501	22.0501	23.635	22.3947	22.2494	22.813	23.0563	22.8395	22.7946	22.4057	22.9331	23.7562	23.1166						9	5	4	NaN	NaN	NaN	NaN	0	NaN	208430000	43	0.268033	0.448787	0.211852	0.274545	-0.547578	-1.2267	0.843636	0.0516176	0.20773	0.924223	0.04111	0.10001	0.0885493	-0.640306	-2.11065	O55143-2;O55143	O55143-2;O55143	Sarcoplasmic/endoplasmic reticulum calcium ATPase 2
		25.2134	25.0403	24.4577	25.0373	24.9621	24.8358	24.7716	24.6336	24.3649	24.7578	24.3651	25.1783	24.9095	24.7636						19	19	19	NaN	NaN	NaN	NaN	0	NaN	962960000	289	0.286412	0.383076	0.0455419	0.954065	-0.0133281	-0.0605477	0.0753559	-0.304811	-2.23851	0.105842	0.441222	1.97061	0.301016	-0.149739	-1.15305	O55201;O55201-2	O55201;O55201-2	Transcription elongation factor SPT5
		22.5644	21.7381	21.5894	21.4945	21.8092	21.6331	21.719	21.9109	21.397	21.7482	21.8679	22.0863	21.676	22.048						4	4	4	NaN	NaN	NaN	NaN	0	NaN	118700000	21	0.984217	0.689261	0.333134	0.782426	-0.0901289	-0.291429	0.51267	-0.0969955	-0.704329	0.598441	0.175579	0.561895	0.25184	-0.168712	-1.29516	O55236	O55236	mRNA-capping enzyme;Polynucleotide 5-triphosphatase;mRNA guanylyltransferase
		27.9518	27.7419	27.2815	27.8278	27.6232	27.7363	27.7877	27.7975	27.9386	27.6927	27.8003	27.7776	28.2329	27.771						34	34	34	NaN	NaN	NaN	NaN	0	NaN	6777600000	799	0.217042	0.547983	0.729293	0.340944	-0.226376	-1.05204	0.37334	0.0743178	0.977222	0.574858	-0.109732	-0.599679	0.220367	-0.190962	-1.40013	O70133-2;O70133;O70133-3	O70133-2;O70133;O70133-3	ATP-dependent RNA helicase A
		24.5662	24.5284	24.1868	25.3253	24.0418	24.8596	24.2761	25.3803	24.7934	24.4922	24.5594	24.3275	25.5855	24.7556						8	8	8	NaN	NaN	NaN	NaN	0	NaN	830040000	110	0.709025	0.695852	0.617043	0.595505	-0.237847	-0.56655	0.949056	-0.0244551	-0.0671619	0.905636	0.0366921	0.124678	0.618466	-0.250084	-0.53051	O70152	O70152	Dolichol-phosphate mannosyltransferase subunit 1
		24.2527	24.5851	24.307	24.1856	24.3612	24.3661	24.5887	24.8779	24.1631	24.1865	24.2942	24.1555	25.0408	24.4959						5	5	3	NaN	NaN	NaN	NaN	0	NaN	775470000	62	0.72357	0.0784336	0.645287	0.378105	-0.23144	-0.966674	0.0740048	-0.333882	-2.25293	0.329108	0.118034	1.08087	0.95442	-0.0155929	-0.0600797	O70172	O70172	Phosphatidylinositol 5-phosphate 4-kinase type-2 alpha
		24.3052	24.221	23.9588	24.2145	24.3649	23.8088	24.0092	24.7308	23.873	23.8548	24.1236	24.4191	24.2685	23.9237						10	10	10	NaN	NaN	NaN	NaN	0	NaN	541750000	81	0.415373	0.360021	0.511082	0.856122	-0.028893	-0.190888	0.31858	-0.277979	-1.10727	0.107444	0.22442	1.95886	0.930715	0.0246658	0.0914116	O70194	O70194	Eukaryotic translation initiation factor 3 subunit D
		25.9147	25.8946	26.2803	25.7009	25.8896	25.8791	25.9812	26.3318	26.5072	26.1765	25.7715	25.7624	25.9066	25.7543						9	8	8	NaN	NaN	NaN	NaN	0	NaN	2006200000	246	0.974813	0.436812	0.145458	0.390806	0.13985	0.939074	0.573158	0.131305	0.602439	0.4124	-0.204111	-0.893759	0.169129	0.212656	1.60625	O70251	O70251	Elongation factor 1-beta
		22.7458	22.3179	22.6369	22.5505	22.9771	22.7431	22.3639	22.4562	21.593	22.0287	22.371	23.1706	22.224	22.8757						4	4	4	21	21	21	NaN	0	NaN	202840000	63	0.245233	0.0661316	0.0849551	0.485186	-0.193984	-0.753337	0.0516332	-0.637563	-2.54414	0.047886	0.565254	2.60625	0.68869	-0.121675	-0.42473	O70252	O70252	Heme oxygenase 2
		20.9618	21.1466	20.2239	21.1461	20.9023	20.6312	20.5978	20.8805	20.8294	20.2993	20.3959	20.4778	20.7003	20.6946						3	3	3	NaN	NaN	NaN	NaN	NaN	NaN	45653000	9	0.150175	0.915531	0.476301	0.400201	0.245361	0.919121	0.200909	-0.24475	-1.47235	0.272841	0.361416	1.23166	0.306704	0.128695	1.13798	O70293;O70293-2;Q8VEB1;O70291	O70293;O70293-2;Q8VEB1	G protein-coupled receptor kinase 6;G protein-coupled receptor kinase 5
		23.6815	23.8768	23.7611	23.6359	23.5707	23.8602	23.6328	24.0023	23.7091	23.5974	23.7716	23.951	23.4635	23.9583						5	5	5	NaN	NaN	NaN	NaN	0	NaN	407500000	39	0.914299	0.564523	0.72688	0.743374	-0.0520978	-0.346074	0.583809	-0.0737685	-0.585229	0.568636	0.0461033	0.609808	0.898002	-0.0244327	-0.134835	O70310	O70310	Glycylpeptide N-tetradecanoyltransferase 1
		20.5545	19.9897	20.539	20.8887	20.5372	20.2188	20.0655	20.6814	20.7775	20.9723	20.6681	20.0193	21.2277	20.5751						4	4	4	NaN	NaN	NaN	NaN	0	NaN	45104000	8	0.21271	0.469908	0.846375	0.767085	-0.114434	-0.312763	0.0657295	0.430254	2.34792	0.235968	-0.313027	-1.34646	0.522105	-0.231661	-0.687928	O70318	O70318	Band 4.1-like protein 2
		24.6736	24.2157	24.2567	23.7477	25.1905	24.1395	24.5875	19.5677	24.5151	24.6917	24.2142	23.8586	20.6085	24.4515						4	4	4	NaN	NaN	NaN	NaN	NaN	NaN	603560000	19	0.937324	0.242396	0.731452	0.276516	1.25054	1.221	0.502454	1.10234	0.722326	0.367283	-0.250247	-0.99079	0.835406	0.398446	0.218869	O70325-2;O70325;Q91XR9	O70325-2;O70325;Q91XR9	Phospholipid hydroperoxide glutathione peroxidase, mitochondrial;Phospholipid hydroperoxide glutathione peroxidase, nuclear
		18.5025	18.5083	20.3619	18.7363	20.3396	20.8533	20.553	20.3135	19.3737	21.3426	20.3267	18.4763	20.1523	20.8025						1	1	1	NaN	NaN	NaN	NaN	NaN	NaN	29149000	9	0.522869	0.20792	0.0545478	0.364667	-0.783131	-0.996707	0.750724	-0.167195	-0.335702	0.12297	-1.32043	-1.85365	0.291993	0.704498	1.17748	O70333	O70333	Cysteine-rich PDZ-binding protein
		24.7211	25.1067	25.0473	25.2761	24.9061	24.9312	25.2747	25.1415	24.4648	24.8503	24.8235	24.8644	25.066	24.9917						7	7	7	NaN	NaN	NaN	NaN	0	NaN	1004000000	194	0.0735753	0.245566	0.282257	0.680534	0.0637625	0.436714	0.0630119	-0.350511	-2.38196	0.118055	0.32493	1.8854	0.473069	0.0893434	0.775574	O70370	O70370	Cathepsin S
		21.6348	18.7066	22.0466	22.2885	22.1464	22.2037	22.5189	21.7556	21.9452	21.6461	22.6439	22.2789	22.8572	22.5552						3	3	3	NaN	NaN	NaN	NaN	0	NaN	144240000	30	0.234586	0.164891	0.640288	0.219604	-1.39464	-1.40285	0.811371	-0.077761	-0.251591	0.411348	-0.909259	-0.895922	0.139382	-0.407618	-1.75632	O70378	O70378	ER membrane protein complex subunit 8
		26.7016	26.8942	27.0398	26.3439	27.1643	26.6976	26.8123	27.3192	26.2566	26.3315	26.5873	26.6224	26.4993	26.6375						19	19	19	NaN	NaN	NaN	NaN	0	NaN	3543900000	362	0.0160088	0.111691	0.828215	0.423329	0.158482	0.871533	0.0250824	-0.606512	-3.16045	0.132828	0.353052	1.79371	0.0668869	0.411942	2.33389	O70400	O70400	PDZ and LIM domain protein 1
		22.7693	23.1754	23.7445	23.364	23.07	23.6832	23.392	23.2594	23.862	24.0158	23.6292	24.0027	23.4712	23.5479						5	5	5	NaN	NaN	NaN	NaN	0	NaN	380330000	25	0.021849	0.909255	0.466927	0.198542	-0.410661	-1.48159	0.0425747	0.484505	2.70411	0.0770138	-0.572386	-2.22118	0.178291	-0.322781	-1.56528	O70404	O70404	Vesicle-associated membrane protein 8
		26.5918	26.8656	26.9703	26.5929	26.6765	27.0117	26.9346	26.6931	26.858	26.9828	26.8361	26.7239	26.3921	26.7167						10	10	10	NaN	NaN	NaN	NaN	0	NaN	3444000000	218	0.665066	0.402979	0.0786748	0.3693	0.144241	0.986252	0.580936	0.063319	0.589852	0.305821	-0.137164	-1.1403	0.169217	0.218085	1.60584	O70435	O70435	Proteasome subunit alpha type-3
		20.4265	19.1748	20.7137	21.138	21.5542	20.8573	21.3099	21.222	20.9332	20.0266	20.8214	20.908	21.8233	21.9451						3	3	3	NaN	NaN	NaN	NaN	0	NaN	68180000	27	0.408105	0.0165018	0.88815	0.0899361	-1.19555	-2.0984	0.0804385	-0.642087	-2.18662	0.694497	-0.230493	-0.416242	0.362983	-0.322967	-1.00053	O70439	O70439	Syntaxin-7
		26.2112	26.5776	26.4281	26.0227	26.2056	26.9853	26.4353	26.826	26.6907	26.5253	26.14	25.966	25.9616	26.2871						5	2	2	NaN	NaN	NaN	NaN	NaN	NaN	2599300000	69	0.217356	0.947216	0.0479103	0.219735	0.238343	1.40238	0.54977	-0.161071	-0.640957	0.506037	-0.142089	-0.715986	0.0647596	0.541503	2.35989	O70456	O70456	14-3-3 protein sigma
		22.7227	22.3248	23.1028	22.211	22.8256	22.9784	22.9473	23.8942	23.0131	23.3067	22.931	22.6709	23.7174	22.6728						3	3	3	NaN	NaN	NaN	NaN	0	NaN	251870000	41	0.48582	0.242495	0.221686	0.306609	-0.430024	-1.13823	0.810014	-0.0777728	-0.253448	0.114601	-0.493293	-1.90854	0.746269	0.141041	0.341983	O70492	O70492	Sorting nexin-3
		22.3698	19.094	22.608	22.2823	22.8173	22.4855	22.9238	17.8566	22.5509	22.2782	22.3201	22.3746	19.9579	22.7904						2	2	2	NaN	NaN	NaN	NaN	NaN	NaN	151840000	8	0.617501	0.734885	0.756196	0.926791	-0.119123	-0.0966068	0.578243	0.862266	0.594198	0.458553	-0.794548	-0.802765	0.913035	-0.186841	-0.114848	O70493	O70493	Sorting nexin-12
		21.1053	20.8412	21.2994	18.6549	21.0288	21.6285	20.9642	20.2038	20.0183	19.6465	20.9445	20.738	20.3441	20.8007						2	2	2	NaN	NaN	NaN	NaN	0	NaN	53980000	6	0.507955	0.316234	0.949644	0.844155	-0.152423	-0.207029	0.172104	-0.753209	-1.59271	0.746101	0.27206	0.34222	0.409835	0.328725	0.899041	O70494-3;O70494-2;O70494	O70494-3;O70494-2;O70494	Transcription factor Sp3
		23.487	23.9246	24.1197	23.9683	24.1043	23.9765	24.1338	24.4586	24.1776	24.1095	23.9362	24.1577	24.0639	23.9347						4	4	4	NaN	NaN	NaN	NaN	0	218	519580000	56	0.70917	0.171922	0.176557	0.344035	-0.1772	-1.04465	0.519263	-0.0938795	-0.692846	0.297571	-0.19951	-1.1623	0.42205	0.11619	0.874111	O70591	O70591	Prefoldin subunit 2
		23.5456	22.513	24.171	23.2728	23.9432	24.479	24.3716	23.7497	24.2636	23.6264	23.8138	23.71	24.2372	23.5681						5	5	5	NaN	NaN	NaN	NaN	0	NaN	498950000	40	0.664667	0.138196	0.138343	0.341696	-0.462839	-1.05024	0.406228	-0.234589	-0.906516	0.282028	-0.525683	-1.20526	0.314911	0.297434	1.11665	O88271	O88271	Craniofacial development protein 1
		19.7861	19.4404	19.2021	19.7827	19.5838	19.8471	19.5175	19.7353	19.6714	20.523	19.4394	19.954	19.1403	19.6903						1	1	1	NaN	NaN	NaN	NaN	0	NaN	23848000	14	0.537612	0.786211	0.328092	0.87863	-0.0420752	-0.160688	0.506301	0.206987	0.71552	0.360254	-0.325123	-1.00677	0.742491	0.0760608	0.347322	O88291-2;O88291	O88291-2;O88291	DBIRD complex subunit ZNF326
		21.0599	22.0464	20.8349	21.1926	21.546	21.2877	21.8989	21.4668	21.1807	21.0223	20.808	21.8175	20.7673	21.5061						4	4	4	NaN	NaN	NaN	NaN	0	NaN	83956000	24	0.318762	0.193362	0.837349	0.851752	-0.0801878	-0.196775	0.0270969	-0.546211	-3.09203	0.430088	0.279804	0.858008	0.563896	0.186219	0.617571	O88351	O88351	Inhibitor of nuclear factor kappa-B kinase subunit beta
		22.4211	22.2291	21.7902	22.9451	22.3892	22.58	22.424	22.6289	22.6652	22.8585	22.5602	22.5696	23.4184	22.9176						3	3	3	NaN	NaN	NaN	NaN	0	NaN	182170000	28	0.0501241	0.27479	0.759236	0.135774	-0.622198	-1.77668	0.118895	0.189132	1.87988	0.28709	-0.348277	-1.19104	0.0863977	-0.463053	-2.13006	O88455	O88455	7-dehydrocholesterol reductase
		25.9196	25.7438	26.3969	25.9967	25.8226	26.1811	25.8451	25.9352	26.1894	26.1788	26.1916	25.6185	25.9893	26.1368						6	6	6	NaN	NaN	NaN	NaN	0	NaN	2015400000	111	0.55251	0.201449	0.396522	0.653203	0.0993875	0.47742	0.0560859	0.240593	2.47643	0.339895	-0.172351	-1.05456	0.854616	0.0311459	0.192916	O88456;Q9D7J7	O88456	Calpain small subunit 1
		22.6748	22.7446	22.7265	21.8485	23.2894	23.5446	23.2799	23.4223	23.5699	22.4901	22.7735	22.8737	23.203	22.7886						7	7	7	NaN	NaN	NaN	NaN	0	21	274040000	76	0.966693	0.0258977	0.0510291	0.16138	-0.456467	-1.64264	0.177728	-0.439565	-1.56774	0.285611	-0.445867	-1.19517	0.0209372	0.428966	3.32308	O88487	O88487	Cytoplasmic dynein 1 intermediate chain 2
		21.7641	23.5329	21.2896	22.0426	22.0898	21.4664	21.2136	21.7525	20.6402	19.5042	21.6062	21.499	20.8685	21.4164						3	3	3	NaN	NaN	NaN	NaN	0	NaN	112930000	24	0.038273	0.979707	0.170069	0.193259	0.89601	1.50259	0.117892	-1.04705	-1.88648	0.0950353	1.57375	2.05501	0.241135	0.369308	1.32942	O88522	O88522	NF-kappa-B essential modulator
		20.4399	21.9209	20.2568	21.0964	21.1353	21.1727	21.201	21.0551	20.7606	21.1474	20.9596	21.1747	21.4534	21.1284						2	2	2	NaN	NaN	NaN	NaN	0	NaN	64634000	25	0.77174	0.30541	0.860478	0.507491	-0.323709	-0.713421	0.125178	-0.185168	-1.83981	0.954422	-0.0273593	-0.0600761	0.28458	-0.111182	-1.19806	O88531	O88531	Palmitoyl-protein thioesterase 1
		19.2612	19.5391	18.9555	19.6519	19.5894	20.1818	20.1158	19.3723	18.5602	19.8306	20.17	18.7846	19.4134	19.2113						2	2	2	NaN	NaN	NaN	NaN	0	NaN	15485000	11	0.358649	0.711005	0.141284	0.411587	0.215495	0.895431	0.560213	-0.294552	-0.623631	0.723297	-0.168336	-0.374633	0.0607101	0.678383	2.41205	O88532	O88532	Zinc finger RNA-binding protein
		21.2791	20.0183	20.6943	21.0111	21.2637	20.5392	21.2264	19.4057	20.8617	19.5465	20.0063	21.6731	21.3281	21.0056						3	3	3	NaN	NaN	NaN	NaN	0	NaN	57346000	9	0.874427	0.243996	0.0867424	0.16493	-0.584898	-1.62576	0.472962	-0.470554	-0.775773	0.236406	0.612502	1.345	0.234972	-0.726846	-1.34979	O88543	O88543	COP9 signalosome complex subunit 3
		24.793	24.9387	24.7523	24.9358	25.13	24.6116	24.793	24.9235	24.8222	24.9163	24.8076	24.8648	25.1226	24.9974						9	9	9	NaN	NaN	NaN	NaN	0	NaN	930510000	210	0.447302	0.401141	0.404466	0.158482	-0.139962	-1.65669	0.909631	-0.0157933	-0.119369	0.925937	0.00623655	0.0977382	0.404927	-0.130406	-0.909224	O88544	O88544	COP9 signalosome complex subunit 4
		20.3617	19.6724	20.4899	19.7125	20.7505	20.1146	19.9197	20.8044	21.6028	21.1018	20.2327	20.6136	20.7618	20.3584						1	1	1	4	4	4	NaN	NaN	NaN	41062000	8	0.0544759	0.933791	0.174259	0.113888	-0.518806	-1.9134	0.230783	0.581805	1.36392	0.0797726	-0.919963	-2.19322	0.550009	-0.180648	-0.640559	O88545	O88545	COP9 signalosome complex subunit 6
		19.3802	19.0457	20.6698	20.3645	18.8521	19.8126	19.485	20.3234	18.7601	19.7603	19.8061	19.3177	20.0217	19.7328						1	1	1	NaN	NaN	NaN	NaN	NaN	NaN	14850000	9	0.614344	0.919727	0.479206	0.736295	0.174317	0.356104	0.719334	-0.176145	-0.380312	0.469237	0.422898	0.782691	0.864328	-0.0724354	-0.179856	O88559-2;O88559	O88559-2;O88559	Menin
		30.503	30.1839	30.7279	30.3121	30.5724	30.6702	30.2635	31.0387	30.3949	30.3207	30.8728	30.4558	30.9491	30.6274						23	23	22	NaN	NaN	NaN	NaN	0	NaN	48732000000	1607	0.654941	0.254929	0.85523	0.241978	-0.245685	-1.32667	0.672546	-0.10677	-0.448522	0.648343	-0.0976909	-0.484751	0.861449	-0.0412246	-0.183723	O88569;O88569-2;O88569-3	O88569;O88569-2;O88569-3	Heterogeneous nuclear ribonucleoproteins A2/B1
		24.2607	24.3072	24.0232	23.8132	24.3434	24.052	24.6623	25.2156	23.7851	23.836	23.9499	24.0458	24.487	24.2095						10	10	10	NaN	NaN	NaN	NaN	0	NaN	624010000	143	0.131765	0.0288798	0.827892	0.436043	-0.146353	-0.846227	0.0623845	-0.711341	-2.39004	0.144666	0.244082	1.72745	0.35351	0.320905	1.02234	O88673	O88673	Diacylglycerol kinase alpha
		23.9326	24.2952	23.4623	23.7001	23.9872	23.3956	23.2093	23.95	23.4956	23.9221	23.4064	24.0089	23.8534	23.6841						10	10	10	NaN	NaN	NaN	NaN	0	NaN	428760000	116	0.941569	0.91933	0.223709	0.995658	-0.0012819	-0.0057196	0.922093	-0.0275165	-0.102833	0.379585	0.239499	0.96342	0.423895	-0.213265	-0.870394	O88685	O88685	26S protease regulatory subunit 6A
		22.2518	18.6929	22.8976	22.7025	22.2512	21.5804	21.4909	22.3531	22.5585	22.5866	22.6929	22.5689	23.1497	22.2418						4	4	4	NaN	NaN	NaN	NaN	0	NaN	156880000	30	0.191711	0.773244	0.84705	0.432648	-1.01728	-0.852928	0.0478188	0.69376	2.60742	0.442839	-0.976466	-0.832931	0.0864174	-0.73457	-2.12988	O88696	O88696	ATP-dependent Clp protease proteolytic subunit, mitochondrial
		24.7658	24.8388	24.6464	24.3932	24.6897	24.9004	25.0617	25.3145	24.9247	24.6456	24.6896	24.4936	25.0204	24.6239						7	7	7	NaN	NaN	NaN	NaN	0	NaN	868160000	118	0.465549	0.189386	0.162303	0.780942	-0.0516125	-0.293487	0.224702	-0.238266	-1.38487	0.528923	-0.0922613	-0.676199	0.23123	0.278915	1.3624	O88712-2;O88712;O88712-3;P56546;P56546-2	O88712-2;O88712;O88712-3	C-terminal-binding protein 1
		19.7003	18.8308	18.0415	18.5842	18.1892	18.1808	18.9403	18.339	18.4404	18.8966	18.2959	18.2104	18.0457	19.5823						3	3	3	NaN	NaN	NaN	NaN	NaN	NaN	10408000	4	0.945471	0.566205	0.498112	0.772241	0.176395	0.305574	0.634715	0.131963	0.505473	0.598572	0.2449	0.561687	0.680933	-0.200468	-0.436127	O88738-3;O88738-2;O88738	O88738-3;O88738-2;O88738	Baculoviral IAP repeat-containing protein 6
		20.55	20.9977	18.5708	19.3461	20.1576	19.9584	18.7212	19.2053	19.9935	19.5064	19.738	21.3853	18.5904	19.5429						2	2	2	NaN	NaN	NaN	NaN	0	NaN	26996000	5	0.844257	0.756867	0.673688	0.978748	0.0265943	0.0279966	0.592476	0.235344	0.571364	0.864135	0.120164	0.180114	0.695062	-0.328914	-0.415418	O88796	O88796	Ribonuclease P protein subunit p30
		22.0683	22.492	22.2989	21.6181	22.3739	21.9164	22.4242	22.2065	18.1563	23.0694	22.1377	21.6897	21.66	22.0721						4	4	4	NaN	NaN	NaN	NaN	0	NaN	150850000	37	0.297118	0.588455	0.665662	0.265161	0.312076	1.25434	0.42171	-1.10906	-0.874797	0.470801	0.998156	0.779782	0.0604866	0.422979	2.41504	O88842;O88842-2	O88842;O88842-2	FYVE, RhoGEF and PH domain-containing protein 3
		19.9985	20.3719	20.3332	20.2379	20.3428	20.2098	20.8642	20.2189	20.1405	17.5983	20.2921	20.3258	20.2403	20.391						3	2	2	NaN	6	6	NaN	NaN	NaN	39424000	5	0.226084	0.199654	0.316825	0.464659	-0.0836242	-0.791252	0.216612	-1.06531	-1.41358	0.280783	0.891768	1.20879	0.650457	0.0899207	0.481559	O88844	O88844	Isocitrate dehydrogenase [NADP] cytoplasmic
		21.7226	22.1136	21.9539	22.2072	22.0571	22.0285	22.2254	22.2624	22.3046	22.1199	21.9182	21.8678	22.5312	21.9956						2	2	2	NaN	NaN	NaN	NaN	0	NaN	141300000	37	0.678224	0.469798	0.610841	0.559012	-0.132193	-0.625613	0.812608	-0.0291022	-0.249899	0.495424	-0.114911	-0.734858	0.951197	0.0118203	0.0643339	O88874	O88874	Cyclin-K
		21.2014	20.6939	20.7268	22.0284	21.6551	21.325	21.1108	21.3378	21.2762	20.7634	21.1087	21.9615	21.6986	20.9749						4	4	4	NaN	NaN	NaN	NaN	0	NaN	77382000	26	0.879407	0.202595	0.544147	0.427602	-0.382373	-0.862963	0.153821	-0.307744	-1.67985	0.78275	0.113213	0.290981	0.532331	-0.187842	-0.670376	O88967	O88967	ATP-dependent zinc metalloprotease YME1L1
		24.6249	24.773	25.0018	19.2452	24.8895	24.9319	24.5931	19.349	24.978	24.8663	24.9094	24.6861	19.3236	18.6864						1	1	1	NaN	NaN	NaN	NaN	NaN	NaN	557100000	23	0.719502	0.246964	0.179167	0.322498	2.5125	1.09736	0.402786	1.47705	0.913696	0.401961	-1.50669	-0.915424	0.313382	2.54215	1.12059	O88974-2;O88974-5;O88974-6;O88974-7;O88974;O88974-4	O88974-2;O88974-5;O88974-6;O88974-7;O88974;O88974-4	Histone-lysine N-methyltransferase SETDB1
		23.6844	23.1385	22.9476	23.8003	23.7008	22.6299	23.2864	22.3601	19.9994	19.2539	22.9064	23.7896	23.2907	24.0232						2	2	2	NaN	NaN	NaN	NaN	0	NaN	295340000	15	0.0893618	0.069777	0.00896346	0.357317	-0.308457	-1.01352	0.0720024	-2.27443	-2.27483	0.0392213	2.67283	2.77309	0.140652	-0.706853	-1.74929	O89023	O89023	Tripeptidyl-peptidase 1
		31.6428	31.9134	31.7514	31.1872	31.7568	31.6894	31.8717	31.9466	31.6541	31.5853	31.5063	31.4538	31.5958	31.5322						28	28	28	NaN	NaN	NaN	NaN	0	NaN	101580000000	1504	0.133738	0.408219	0.250629	0.628944	0.0964225	0.514322	0.0284975	-0.234242	-3.04775	0.832669	0.041784	0.22258	0.0127722	0.28888	3.78895	O89053	O89053	Coronin-1A
		24.0968	23.9211	23.8167	23.9397	23.9148	23.6933	23.6861	24.0825	23.7676	23.1161	23.5523	23.7914	24.0378	23.8718						5	5	5	NaN	NaN	NaN	NaN	0	NaN	457250000	138	0.0882914	0.274138	0.0368531	0.65641	0.0432161	0.472597	0.121469	-0.365523	-1.86321	0.0445119	0.464894	2.66693	0.679887	-0.0561544	-0.437668	O89079	O89079	Coatomer subunit epsilon
		24.467	24.4908	24.7904	23.8808	24.5798	24.8273	23.9781	25.4427	24.8419	24.6876	24.5967	24.4031	23.8758	23.5684						5	5	5	NaN	NaN	NaN	NaN	0	NaN	746270000	75	0.358189	0.525498	0.0493771	0.191875	0.458148	1.50819	0.996385	0.00173171	0.00476121	0.252174	-0.301483	-1.29411	0.125697	0.7579	1.83659	O89086	O89086	RNA-binding protein 3
		22.8205	22.7839	22.5347	22.6652	23.1442	22.4882	22.5501	22.9867	22.5505	22.3675	20.1369	22.7318	23.1067	22.4896						3	3	3	NaN	NaN	NaN	NaN	0	NaN	193280000	35	0.169531	0.162971	0.182128	0.675206	-0.0749235	-0.444581	0.16266	-1.10732	-1.63651	0.180747	1.01612	1.55465	0.949199	0.0162735	0.0669729	O89090;O89090-2	O89090	Transcription factor Sp1
		26.38	26.3867	26.4656	26.2889	26.558	26.4126	26.1567	26.7695	26.3473	26.2519	26.4898	26.2207	26.3758	26.4665						15	15	15	NaN	NaN	NaN	NaN	0	NaN	2652500000	292	0.460707	0.584871	0.579078	0.73904	0.0259649	0.35221	0.525144	-0.111224	-0.682687	0.819158	0.017331	0.240956	0.496973	0.119857	0.732087	O89100	O89100	GRB2-related adaptor protein 2
		21.1271	19.0206	18.998	18.9353	19.4449	19.7048	19.4124	19.786	19.4319	19.1408	19.4805	19.2117	19.7016	19.0591						1	1	1	NaN	NaN	NaN	NaN	NaN	NaN	16521000	6	0.533305	0.937561	0.891549	0.776525	0.196103	0.299617	0.156303	-0.235964	-1.66744	0.802122	0.169207	0.264266	0.237727	0.262861	1.34062	O89106	O89106	Bis(5-adenosyl)-triphosphatase
		24.3022	24.5449	23.9285	23.9963	24.6883	23.9914	24.4702	23.6544	24.0552	23.8405	23.5431	23.9718	23.7917	23.8193						9	9	9	NaN	NaN	NaN	NaN	0	NaN	533740000	74	0.0664474	0.887026	0.911417	0.116642	0.33202	1.89478	0.255855	-0.38816	-1.28265	0.129568	0.38004	1.81302	0.278535	0.34014	1.2152	O89110	O89110	Caspase-8;Caspase-8 subunit p18;Caspase-8 subunit p10
		21.931	21.7656	22.1228	18.8216	21.5351	21.6186	21.766	22.6404	19.34	22.0974	22.2877	21.4783	22.1555	21.6285						2	2	2	NaN	NaN	NaN	NaN	0	NaN	115320000	34	0.966635	0.335065	0.867561	0.556193	-0.593848	-0.630275	0.480977	-0.648326	-0.761017	0.949454	-0.0814274	-0.066636	0.711321	0.135905	0.39184	O89112	O89112	LanC-like protein 1
		19.3958	21.1475	19.2248	18.4238	17.8404	19.0802	18.1757	19.5821	19.8925	19.4709	19.151	19.2404	19.5805	18.7524						1	1	1	NaN	NaN	NaN	NaN	0	NaN	12772000	15	0.595005	0.17071	0.531492	0.635635	0.356867	0.504067	0.160871	0.835216	1.64509	0.953374	0.0431569	0.0614601	0.358272	-0.521506	-1.01132	O89116	O89116	Vesicle transport through interaction with t-SNAREs homolog 1A
		22.2426	19.6683	21.3907	21.2147	21.7623	21.0056	22.2596	21.9578	21.3441	18.9734	21.3712	21.2062	20.184	21.7864						3	3	3	NaN	NaN	NaN	NaN	NaN	NaN	86067000	13	0.259198	0.301289	0.910168	0.928659	0.0701938	0.0941332	0.168927	-1.18342	-1.60717	0.564826	0.566174	0.616044	0.230432	0.687442	1.36512	P00329	P00329	Alcohol dehydrogenase 1
		25.5607	25.8309	25.1152	25.9947	25.0396	25.3111	24.9194	25.6855	25.9565	25.2232	25.1538	26.0743	26.0732	25.5547						5	5	5	NaN	NaN	NaN	NaN	0	NaN	1578500000	90	0.255803	0.900538	0.0608627	0.353807	-0.275364	-1.02165	0.515834	0.205614	0.698806	0.588265	0.180831	0.578085	0.0442691	-0.66181	-2.6715	P00405	P00405	Cytochrome c oxidase subunit 2
		25.3949	25.8887	25.6744	25.2269	25.3459	25.7524	26.0547	25.7384	25.6188	25.7724	25.4538	25.3529	25.2852	25.3724						7	7	7	NaN	NaN	NaN	NaN	0	NaN	1553200000	175	0.245609	0.888616	0.107382	0.285388	0.209374	1.1958	0.591772	-0.107829	-0.572487	0.731974	-0.0688192	-0.362247	0.0764381	0.386022	2.22715	P00493	P00493	Hypoxanthine-guanine phosphoribosyltransferase
		18.7585	20.5733	21.5675	17.9094	19.9595	20.7896	21.2993	20.5934	22.179	20.6423	19.0569	20.5739	20.6241	17.9029						1	1	1	NaN	NaN	NaN	NaN	0	NaN	42472000	20	0.98102	0.841831	0.234239	0.998848	0.00188303	0.00151796	0.96823	-0.0344192	-0.0418605	0.490348	-0.923856	-0.743987	0.294565	0.960158	1.17045	P01592	P01592	Immunoglobulin J chain
		20.1178	22.6297	22.0716	22.2256	18.3478	21.9425	23.0893	20.5126	21.2991	22.5069	21.0534	19.1568	22.0571	20.4186						1	1	1	NaN	NaN	NaN	NaN	0	NaN	94010000	6	0.727681	0.274301	0.860317	0.263278	1.21701	1.26	0.631122	0.646778	0.510977	0.860119	0.14137	0.185511	0.771381	0.428864	0.306773	P01757;P01756;P06330	P01757;P01756;P06330	Ig heavy chain V region J558;Ig heavy chain V region MOPC 104E;Ig heavy chain V region AC38 205.12
		29.1323	29.0219	29.1038	29.3482	29.2131	29.2689	29.2213	28.824	29.0303	28.8886	29.094	29.1674	29.2317	29.5021						5	5	5	NaN	NaN	NaN	NaN	0	NaN	17798000000	342	0.906826	0.218555	0.106329	0.265994	-0.148875	-1.25186	0.379778	-0.12751	-0.962995	0.188506	0.147248	1.52197	0.310234	-0.168613	-1.12874	P01831	P01831	Thy-1 membrane glycoprotein
		22.7252	24.6168	25.6098	24.8062	22.6375	25.0161	25.681	23.126	24.1647	23.9457	22.5694	24.9572	23.5897	22.7799						5	5	5	NaN	NaN	NaN	NaN	0	NaN	734680000	61	0.375634	0.889297	0.689958	0.492473	0.663904	0.740158	0.588577	-0.555238	-0.577586	0.340157	0.87956	1.05393	0.75176	0.339582	0.334243	P01837	P01837	Ig kappa chain C region
		18.8008	18.984	23.7386	18.9392	22.792	23.4782	23.9104	23.7505	17.6509	23.4901	23.4531	23.2849	23.2987	23.2558						3	3	3	NaN	NaN	NaN	NaN	0	NaN	283480000	21	0.590704	0.0328295	0.475403	0.0777961	-3.16412	-2.21314	0.289962	-1.95138	-1.18307	0.541709	-1.41572	-0.654477	0.518466	0.202979	0.694229	P01845;P01844	P01845;P01844	Ig lambda-3 chain C region;Ig lambda-2 chain C region
		21.4011	18.8378	20.8423	20.508	20.4264	20.7494	20.3299	17.9318	20.9125	19.5145	18.0989	20.741	21.4317	18.6388						2	2	2	NaN	NaN	NaN	NaN	0	NaN	37262000	10	0.740735	0.978577	0.376307	0.899939	0.126827	0.132256	0.746161	-0.35076	-0.342136	0.38886	0.888672	0.943256	0.70912	-0.411085	-0.395016	P01849	P01849	T-cell receptor alpha chain C region
		25.1023	24.1001	24.5814	19.2734	24.345	24.3724	24.5176	24.0754	22.3715	24.2778	23.6751	24.0954	24.9245	24.9239						4	4	4	NaN	NaN	NaN	NaN	0	NaN	654660000	24	0.773212	0.205985	0.933769	0.429187	-1.38362	-0.859801	0.12612	-0.886115	-1.83398	0.91919	-0.17716	-0.106681	0.265489	-0.320347	-1.25336	P01852;P01851	P01852;P01851	T-cell receptor beta-1 chain C region;T-cell receptor beta-2 chain C region
		25.2936	26.8422	26.0052	26.2675	25.0528	26.4331	26.2517	25.6312	28.4012	26.6501	24.9312	27.1165	26.2619	25.2487						17	17	17	39	39	39	NaN	0	NaN	2577500000	231	0.415875	0.540303	0.863846	0.863382	-0.10692	-0.181126	0.412847	0.818594	0.89284	0.570292	-0.558689	-0.607105	0.55813	-0.366826	-0.62707	P01872;P01872-2	P01872;P01872-2	Ig mu chain C region
		18.9808	23.51	25.4428	22.9711	22.9074	22.9882	24.788	22.7023	22.763	23.4315	22.0204	22.452	22.3584	22.8104						6	6	6	36	36	36	NaN	0	NaN	435040000	77	0.65822	0.760923	0.648587	0.912514	0.185928	0.11554	0.403549	-0.608147	-0.912099	0.994395	-0.012114	-0.00738259	0.226277	0.806189	1.37939	P01878	P01878	Ig alpha chain C region
		24.3299	25.0121	24.924	24.3611	25.0189	25.5605	24.82	23.8315	25.3587	25.0769	25.0245	24.9399	25.0913	25.4946						2	2	2	NaN	NaN	NaN	NaN	0	NaN	961710000	62	0.117807	0.70991	0.803541	0.0974836	-0.518477	-2.03503	0.463826	0.345621	0.792816	0.0840829	-0.496545	-2.15152	0.450348	-0.367553	-0.818418	P01887	P01887	Beta-2-microglobulin
		27.2161	27.1841	27.6966	27.6028	27.1308	27.4936	27.2446	27.6029	27.304	27.398	27.3853	27.2344	28.2295	27.5433						15	12	2	45	NaN	NaN	NaN	0	NaN	5643900000	259	0.471957	0.545439	0.281324	0.439714	-0.244152	-0.839026	0.968086	-0.00551955	-0.0420508	0.70779	0.0624558	0.396937	0.327848	-0.301088	-1.08399	P01899	P01899	H-2 class I histocompatibility antigen, D-B alpha chain
		17.5552	17.8787	17.7483	18.7848	19.5557	20.4869	17.7027	17.3936	23.6424	23.7301	18.934	18.7808	17.5534	16.804						2	1	1	NaN	NaN	NaN	NaN	0	NaN	45520000	4	0.102769	0.118931	0.0119882	0.650826	0.278985	0.481002	0.0912451	3.31747	2.08701	0.0296487	-4.11046	-3.01314	0.333197	1.07198	1.07081	P02104	P02104	Hemoglobin subunit epsilon-Y2
		19.265	18.7873	18.1278	18.1483	18.7136	18.4103	19.3551	23.4784	20.2787	19.5451	19.0996	18.8186	20.6374	16.8854						16	2	2	NaN	NaN	NaN	NaN	0	NaN	43125000	13	0.932298	0.620131	0.21665	0.844875	-0.198374	-0.206056	0.816675	-0.348194	-0.244343	0.0585083	-1.05906	-2.44202	0.500151	1.20888	0.726418	P84244;P02301	P84244;P02301	Histone H3.3;Histone H3.3C
		22.384	22.1402	22.3775	23.0923	23.6203	22.7021	23.295	22.8579	22.5203	22.9952	23.3329	23.0151	23.0067	23.5606						1	1	1	13	13	13	NaN	0	NaN	241480000	39	0.246667	0.0551531	0.400373	0.0603743	-0.695627	-2.41654	0.615326	-0.169352	-0.535392	0.209749	-0.450965	-1.43875	0.806099	-0.0753096	-0.258809	P03899	P03899	NADH-ubiquinone oxidoreductase chain 3
		24.3068	24.1888	24.3533	24.7553	24.0455	24.621	24.0078	24.3158	24.1442	24.0468	24.3741	23.8237	23.935	24.1116						4	4	4	NaN	NaN	NaN	NaN	0	NaN	606720000	42	0.0688022	0.156987	0.758377	0.0403377	0.444328	2.74943	0.764218	-0.0591578	-0.316768	0.258049	0.212701	1.2759	0.171415	0.290785	1.59582	P04235	P04235	T-cell surface glycoprotein CD3 delta chain
		19.549	20.9561	21.1984	18.6023	21.2457	21.2359	21.1304	21.24	21.3807	22.1449	21.0343	21.2381	21.8714	18.444						2	2	2	NaN	NaN	NaN	NaN	0	NaN	64608000	34	0.537787	0.712625	0.0982059	0.714528	-0.441354	-0.387219	0.31733	0.306962	1.11046	0.121035	-1.44353	-1.86599	0.466055	0.695213	0.788634	P04370-2;P04370	P04370-2;P04370	Myelin basic protein
		19.1573	20.5283	21.3587	22.818	19.6582	20.7214	21.2264	19.8035	21.5746	22.0815	21.5978	21.4978	22.1167	21.9415						2	2	2	NaN	NaN	NaN	NaN	0	NaN	73048000	27	0.0508444	0.560146	0.504143	0.37943	-0.886388	-0.963759	0.0296344	1.39893	3.01356	0.430763	-0.785734	-0.856666	0.0240962	-1.49959	-3.19624	P04441-2;P04441	P04441-2;P04441	H-2 class II histocompatibility antigen gamma chain
		21.5512	22.2336	21.5531	21.3535	21.4965	21.2894	21.7549	21.7492	21.3742	20.2533	21.5613	21.4432	21.452	21.5141						4	4	4	NaN	NaN	NaN	NaN	0	NaN	98141000	25	0.130024	0.596182	0.26758	0.41528	0.203107	0.887857	0.223101	-0.509579	-1.39047	0.197716	0.609946	1.48483	0.47716	0.10274	0.768022	P04627	P04627	Serine/threonine-protein kinase A-Raf
		28.9635	28.8227	29.1641	28.365	28.8869	28.6824	29.0166	28.9619	28.687	28.7072	28.7335	28.2999	28.3871	28.6645						22	22	22	NaN	NaN	NaN	NaN	0	NaN	13964000000	966	0.0412619	0.523569	0.21173	0.147407	0.378344	1.71289	0.0974728	-0.177697	-2.03512	0.578055	0.119578	0.594502	0.0181313	0.436463	3.45543	P05064;P05063	P05064	Fructose-bisphosphate aldolase A
		20.8275	20.4088	19.9624	20.677	20.6518	19.3444	18.1339	18.7867	19.199	20.2538	20.0956	21.0395	19.7733	20.5781						6	2	2	NaN	NaN	NaN	NaN	NaN	NaN	32536000	5	0.453655	0.280649	0.040617	0.9895	0.00528892	0.0138311	0.409823	0.620265	0.899066	0.141298	0.619471	1.74573	0.140102	-1.23445	-1.75233	P05132-2;P05132	P05132-2;P05132	cAMP-dependent protein kinase catalytic subunit alpha
		26.0263	26.0981	26.1566	25.897	25.9432	25.7794	26.2283	26.0935	26.0162	25.9846	26.0671	25.7948	25.6166	26.0067						12	12	12	39	39	39	NaN	0	NaN	1993900000	284	0.195604	0.197052	0.288978	0.0932679	0.238483	2.06976	0.924816	0.0115294	0.0992233	0.764754	0.0218558	0.31602	0.225259	0.205098	1.38293	P05201	P05201	Aspartate aminotransferase, cytoplasmic
		27.9593	27.5994	27.9583	28.1734	27.8876	27.6088	28.0084	28.1709	28.0553	27.8568	28.0233	28.0223	28.1402	28.1819						19	19	19	NaN	NaN	NaN	NaN	0	NaN	7676300000	463	0.256516	0.598094	0.518556	0.246168	-0.192227	-1.31314	0.706848	0.059518	0.3983	0.72462	-0.0558855	-0.372741	0.237111	-0.19586	-1.34266	P05202	P05202	Aspartate aminotransferase, mitochondrial
		29.1257	29.2845	28.9459	28.6417	28.9435	29.0079	29.3492	29.0403	28.9781	28.8381	28.636	29.1996	29.2269	28.969						20	20	0	NaN	NaN	0	NaN	0	NaN	16802000000	1137	0.556659	0.126362	0.32868	0.487835	-0.132401	-0.74853	0.104659	-0.267832	-1.97939	0.365595	0.182058	0.994604	0.728229	-0.0466267	-0.367585	P05213;Q3UX10	P05213	Tubulin alpha-1B chain
		23.0704	23.3553	25.2549	22.3925	19.1016	24.6707	17.4374	25.5538	23.2591	24.0324	24.3842	23.7889	25.9372	19.1527						2	2	2	NaN	NaN	NaN	NaN	NaN	NaN	601770000	35	0.597657	0.355736	0.772496	0.771865	0.558714	0.306098	0.400675	2.20104	0.918125	0.650873	-0.373619	-0.480931	0.681156	-1.26871	-0.435797	P05977-2;P05977;P09542	P05977-2;P05977;P09542	Myosin light chain 1/3, skeletal muscle isoform;Myosin light chain 3
		29.8974	30.1548	30.1836	29.8034	29.9093	29.9292	30.228	30.2328	30.2154	30.149	30.0599	29.7725	30.1328	29.7907						16	16	15	NaN	NaN	NaN	NaN	0	NaN	32763000000	1054	0.816108	0.485183	0.129867	0.487773	0.111153	0.748644	0.580734	0.0666205	0.590177	0.314084	-0.131646	-1.11878	0.277743	0.176179	1.21747	P06151;P00342	P06151	L-lactate dehydrogenase A chain
		19.4669	19.1444	21.2845	20.2708	20.1694	20.5476	20.6509	20.2949	20.128	19.3379	20.3915	20.2633	18.3218	20.5161						3	3	3	NaN	NaN	NaN	NaN	0	NaN	40019000	7	0.3725	0.809254	0.484134	0.690803	0.341266	0.421637	0.177954	-0.463216	-1.56675	0.891866	0.0891903	0.143011	0.28284	0.715292	1.20296	P06537-5;P06537-3;P06537-4;P06537;P06537-2	P06537-5;P06537-3;P06537-4;P06537;P06537-2	Glucocorticoid receptor
		26.5693	26.7925	26.951	26.3069	26.8089	26.568	27.1068	26.7653	26.1827	26.6638	26.6464	26.9056	26.3078	26.7234						17	17	17	NaN	NaN	NaN	NaN	0	NaN	3262900000	382	0.289971	0.310326	0.974856	0.968186	0.00931104	0.0419187	0.152088	-0.314631	-1.68864	0.49086	0.157286	0.743062	0.438592	0.166655	0.84122	P06745;CON__Q3ZBD7	P06745	Glucose-6-phosphate isomerase
		28.5878	28.6898	28.3673	28.4642	28.1009	28.5878	28.7897	28.5209	28.9437	29.0175	28.3892	28.0076	29.1376	28.5321						42	42	42	NaN	NaN	NaN	NaN	0	NaN	11701000000	1033	0.416333	0.557102	0.608199	0.915612	-0.031823	-0.111427	0.287611	0.283616	1.18959	0.22623	-0.256162	-1.37956	0.861336	-0.0592769	-0.183874	P06800-3;P06800-2;P06800	P06800-3;P06800-2;P06800	Receptor-type tyrosine-protein phosphatase C
		23.9925	24.9644	24.8953	24.4636	24.4476	24.5497	24.984	23.9814	25.2573	25.8068	25.1975	24.4432	25.2739	24.7842						5	5	5	NaN	NaN	NaN	NaN	0	NaN	880440000	60	0.0235181	0.199277	0.287571	0.479555	-0.254842	-0.763621	0.0245863	0.929867	3.17825	0.0426731	-0.841615	-2.70217	0.327386	-0.343095	-1.08514	P07309	P07309	Transthyretin
		24.8746	25.6658	25.9299	25.8458	25.1718	25.6702	25.9193	25.1491	26.1983	26.3659	25.9761	26.2035	26.8688	26.1878						15	15	15	NaN	NaN	NaN	NaN	0	NaN	1867900000	284	0.00426761	0.833325	0.435073	0.0571001	-0.841011	-2.46183	0.0345974	0.702504	2.87977	0.101992	-0.60109	-1.99959	0.0235584	-0.942426	-3.21646	P07356	P07356	Annexin A2
		21.0795	20.2423	22.9582	22.3145	21.9851	21.4452	22.7217	22.0752	19.5005	20.7034	22.5384	21.7811	23.1148	22.3037						6	5	5	NaN	12	12	NaN	0	NaN	140440000	27	0.735296	0.149489	0.361071	0.385862	-0.75125	-0.949731	0.213158	-1.1427	-1.42615	0.508702	0.734547	0.71129	0.478892	-0.3431	-0.764838	P07724	P07724	Serum albumin
		28.3368	28.6804	28.6596	28.3955	28.3904	28.6485	28.8469	28.6555	28.8092	28.577	28.4886	28.4279	28.6237	28.3398						34	20	20	NaN	NaN	NaN	NaN	0	NaN	12150000000	735	0.735468	0.982664	0.165373	0.685139	0.0542542	0.429939	0.942419	-0.0103787	-0.0759304	0.454484	-0.106891	-0.810501	0.24799	0.171524	1.30732	P07901;REV__Q8BL66	P07901	Heat shock protein HSP 90-alpha
		26.4086	27.3836	27.9041	27.7238	26.3932	27.523	27.884	27.1827	27.3098	27.2938	26.7301	27.072	28.0302	26.9791						28	28	28	NaN	NaN	NaN	NaN	0	NaN	5701700000	519	0.84275	0.890354	0.584146	0.991477	-0.00543801	-0.0112267	0.755532	-0.134496	-0.328939	0.591493	0.243784	0.572931	0.816795	-0.114727	-0.24418	P08003	P08003	Protein disulfide-isomerase A4
		24.5243	24.4735	24.3328	24.2673	24.645	24.4538	24.428	24.1296	23.5647	24.0787	24.1307	24.8774	23.865	24.5499						3	3	3	NaN	NaN	NaN	NaN	0	NaN	667670000	61	0.189702	0.192381	0.162121	0.908763	-0.0312649	-0.120522	0.0553349	-0.489405	-2.48743	0.0360481	0.474793	2.84468	0.954806	-0.0166527	-0.0595698	P08030	P08030	Adenine phosphoribosyltransferase
		19.6062	18.7552	18.5503	19.0927	18.0843	18.1104	19.0846	19.0842	20.224	21.7103	18.5343	19.2562	25.425	20.5013						11	10	10	NaN	NaN	NaN	NaN	0	NaN	88716000	29	0.0388204	0.633807	0.298181	0.148937	-2.72642	-1.70488	0.120875	1.56531	1.86702	0.215419	-1.1551	-1.4179	0.109157	-3.13663	-1.94651	P08032	P08032	Spectrin alpha chain, erythrocytic 1
		27.5644	28.4675	28.9872	28.876	27.633	28.6721	29.2197	27.616	28.6212	28.8251	28.1205	28.3708	28.8839	28.2694						36	34	34	NaN	NaN	NaN	NaN	0	NaN	11772000000	816	0.68548	0.730938	0.794124	0.937289	-0.0342476	-0.0827131	0.656562	0.23708	0.472368	0.912717	-0.0484675	-0.11527	0.672337	-0.22286	-0.448831	P08113	P08113	Endoplasmin
		20.8264	21.965	21.8228	21.9452	21.057	22.135	21.8349	21.8605	22.4365	21.685	20.4107	22.4365	22.5468	22.5605						2	2	2	NaN	NaN	NaN	NaN	0	NaN	123970000	24	0.332837	0.170113	0.187843	0.0430586	-0.874779	-2.69465	0.724253	-0.211122	-0.373266	0.835639	0.129115	0.218553	0.0349862	-0.792771	-2.87021	P08207	P08207	Protein S100-A10
		28.1582	29.0359	29.274	28.1998	28.5683	29.2189	28.9767	28.573	29.2369	29.101	29.2987	28.7264	29.1028	28.9579						7	7	7	NaN	NaN	NaN	NaN	0	NaN	15141000000	356	0.141974	0.899268	0.288096	0.488491	-0.262041	-0.747342	0.111054	0.377979	1.93306	0.171694	-0.545225	-1.59456	0.671154	-0.0947952	-0.450587	P08228	P08228	Superoxide dismutase [Cu-Zn]
		29.6566	29.3185	29.6416	29.902	29.5757	29.334	29.7791	29.5274	29.6781	29.5174	29.8544	29.6363	29.654	29.842						18	18	18	NaN	NaN	NaN	NaN	0	NaN	25560000000	1500	0.32563	0.761553	0.623501	0.61622	-0.0811272	-0.534	0.383652	0.129211	0.954528	0.755903	-0.0536397	-0.328418	0.253119	-0.156699	-1.29115	P08249	P08249	Malate dehydrogenase, mitochondrial
		21.326	21.7122	21.4588	21.1943	21.3984	21.6165	22.091	23.0687	21.1383	21.0639	20.8275	20.6292	22.413	21.8782						2	2	2	NaN	NaN	NaN	NaN	0	NaN	104650000	23	0.231913	0.0773603	0.988628	0.657321	-0.217303	-0.47123	0.0682092	-1.03372	-2.31817	0.0423923	0.412897	2.7077	0.545791	0.403523	0.647614	P08414	P08414	Calcium/calmodulin-dependent protein kinase type IV
		20.5206	20.2249	19.6643	20.1881	20.5653	20.0691	19.5343	20.7223	19.8748	19.9936	19.4403	20.2693	20.2903	20.1754						4	1	0	NaN	NaN	0	NaN	NaN	NaN	30719000	10	0.400489	0.250951	0.346759	0.672147	-0.0955288	-0.449114	0.248821	-0.453193	-1.30468	0.193943	0.379911	1.49984	0.9471	-0.0222465	-0.0697454	P08556	P08556	GTPase NRas
		27.4807	27.304	26.9402	27.2555	27.2261	27.1143	27.3811	27.5513	27.2638	27.3552	26.9845	27.1159	27.5871	27.2936						15	15	12	53	53	NaN	NaN	0	NaN	4879400000	443	0.898518	0.407155	0.805119	0.641482	-0.0871035	-0.495152	0.459543	-0.117017	-0.800892	0.797858	0.0439262	0.270126	0.933932	-0.0140125	-0.0871542	P08752;B2RSH2;P18872-2;P18872;P20612;Q3V3I2;P50149;Q8CGK7	P08752	Guanine nucleotide-binding protein G(i) subunit alpha-2
		23.1416	23.359	22.9281	22.9679	23.1804	22.6271	23.2409	23.2683	22.9343	23.3056	22.6744	22.8989	23.6263	23.1299						12	12	12	10	10	10	NaN	0	NaN	271110000	103	0.972054	0.56268	0.421637	0.60142	-0.119181	-0.557188	0.667291	-0.107737	-0.456328	0.535957	0.127755	0.664207	0.607194	-0.139198	-0.548102	P08775	P08775	DNA-directed RNA polymerase II subunit RPB1
		22.5894	22.5197	22.408	22.9114	22.5725	22.5709	22.2675	22.3314	22.1184	22.0744	22.1536	22.5266	22.1643	22.5046						2	2	2	NaN	NaN	NaN	NaN	0	NaN	166840000	42	0.0182662	0.807223	0.0359692	0.252159	0.208617	1.29416	0.0208248	-0.320105	-3.32799	0.012606	0.491637	3.80175	0.796092	0.0370852	0.272556	P08920	P08920	T-cell surface antigen CD2
		20.8878	21.5512	21.0046	21.7935	21.12	20.9799	21.5656	19.6513	21.2959	22.4587	20.9312	21.8428	21.6245	21.69						5	5	5	NaN	NaN	NaN	NaN	0	NaN	78762000	32	0.121083	0.549037	0.366929	0.178561	-0.409843	-1.56411	0.291383	0.732721	1.17916	0.608632	-0.252636	-0.545847	0.12934	-0.889929	-1.81439	P09055;P09055-2	P09055;P09055-2	Integrin beta-1
		27.439	27.8969	28.1932	28.1345	27.6178	27.9756	28.3347	27.6937	28.2873	28.179	28.042	27.8669	27.8416	28.0303						23	23	23	NaN	NaN	NaN	NaN	0	NaN	8035800000	717	0.389165	0.437953	0.416009	0.989146	0.00298421	0.0142972	0.246543	0.263976	1.31194	0.283986	-0.253494	-1.19973	0.971332	-0.00749811	-0.0377708	P09103	P09103	Protein disulfide-isomerase
		30.266	30.2002	30.2335	30.3226	30.1433	30.4599	30.1069	30.4629	30.3716	30.166	30.2264	30.151	30.493	30.2806						31	31	31	39	39	39	NaN	0	NaN	38978000000	1684	0.92905	0.573038	0.920107	0.579649	-0.0526435	-0.591927	0.771914	-0.0385609	-0.30603	0.98866	0.000890732	0.0149373	0.920253	-0.0149733	-0.105272	P09405	P09405	Nucleolin
		28.415	28.6073	28.8993	28.3682	28.7763	28.6902	28.8539	28.7063	28.7706	28.5139	28.6762	28.555	28.5484	28.6033						20	20	20	NaN	NaN	NaN	NaN	0	NaN	13097000000	672	0.526764	0.411549	0.129345	0.981153	0.00356086	0.0248278	0.236937	-0.103119	-1.34324	0.625017	-0.0811083	-0.520372	0.0100011	0.187788	4.03203	P09411;P09041	P09411	Phosphoglycerate kinase 1
		25.5873	25.9352	26.0297	25.3261	25.7183	25.5639	25.8988	25.0815	25.8705	25.6998	25.496	25.7444	24.6977	25.5213						10	10	10	NaN	NaN	NaN	NaN	0	NaN	1604400000	142	0.505412	0.241661	0.603691	0.278859	0.398449	1.21428	0.609875	0.12309	0.5439	0.889973	0.0308561	0.145535	0.501315	0.244502	0.724349	P09528	P09528	Ferritin heavy chain;Ferritin heavy chain, N-terminally processed
		26.3123	26.2066	26.3932	26.0556	25.4719	27.0082	26.3783	24.3691	26.2751	26.603	26.0388	26.0853	25.1338	26.1417						2	2	2	NaN	NaN	NaN	NaN	NaN	NaN	2231500000	16	0.954566	0.232967	0.913342	0.173552	0.454981	1.5862	0.503582	0.498764	0.720326	0.709927	-0.0637156	-0.39385	0.979324	0.0199323	0.027237	P09602	P09602	Non-histone chromosomal protein HMG-17
		25.1892	25.5171	25.8866	25.8207	25.897	25.3148	26.1726	25.8034	25.8762	26.1296	26.1617	25.8021	26.0178	25.9058						6	6	6	NaN	NaN	NaN	NaN	0	NaN	1780400000	141	0.0878544	0.754321	0.279757	0.180439	-0.305165	-1.55598	0.30125	0.258904	1.15242	0.0769284	-0.452434	-2.22206	0.630246	-0.111635	-0.512323	P09671	P09671	Superoxide dismutase [Mn], mitochondrial
		20.9806	18.5782	20.5652	21.7852	21.038	20.8048	20.366	19.8471	19.843	19.1314	20.1521	21.2248	20.1819	21.2291						2	2	2	NaN	NaN	NaN	NaN	0	NaN	47855000	19	0.678683	0.290965	0.258921	0.659595	-0.401278	-0.46782	0.10051	-0.805128	-2.01106	0.405062	0.768449	0.908942	0.430932	-0.364599	-0.85633	P09925	P09925	Surfeit locus protein 1
		20.7622	19.9882	19.4896	18.2261	19.6765	19.1959	19.5772	20.0047	20.3118	20.8156	19.7151	19.2342	20.4546	19.7815						1	1	1	NaN	NaN	NaN	NaN	0	NaN	14948000	18	0.282937	0.615332	0.568313	0.778052	-0.206941	-0.297496	0.0999687	0.667285	2.01529	0.375846	-0.664361	-0.971659	0.580095	-0.209866	-0.591208	P0C0A3	P0C0A3	Charged multivesicular body protein 6
		29.0721	29.3637	29.9117	30.9265	30.1436	29.6228	29.5546	28.69	29.4117	29.7101	29.5717	30.0969	29.311	29.6336						4	2	2	NaN	NaN	NaN	NaN	0	NaN	26133000000	165	0.90659	0.685727	0.511334	0.801031	0.138036	0.265764	0.871814	0.0617358	0.169813	0.625206	0.254022	0.52008	0.678518	-0.177722	-0.439688	Q3THW5;P0C0S6	Q3THW5;P0C0S6	Histone H2A.V;Histone H2A.Z
		21.1053	20.8689	20.9029	19.9433	21.0623	20.5666	20.4171	20.9594	19.4507	19.0569	20.3803	20.8048	20.29	20.5251						1	1	1	NaN	NaN	NaN	NaN	0	NaN	45174000	21	0.0278366	0.123525	0.114948	0.638915	0.165205	0.499061	0.0305409	-1.12206	-2.98733	0.0620188	1.07585	2.39479	0.382682	0.211419	0.956642	P0C8B4	P0C8B4	Uncharacterized protein C14orf142 homolog
		21.5787	21.5239	16.6252	18.8976	21.8708	21.1929	21.5663	22.0948	21.8393	21.4638	19.5659	21.2458	21.6846	21.6193						4	4	4	NaN	NaN	NaN	NaN	0	NaN	67543000	20	0.479572	0.0977914	0.365793	0.244459	-1.86025	-1.31863	0.303661	-0.72484	-1.14601	0.432695	-1.30002	-0.852835	0.55159	0.164611	0.637922	P0CG14	P0CG14	Chromosome transmission fidelity protein 8 homolog isoform 2
		21.7435	20.0059	22.5675	22.2942	21.7673	21.3978	21.9893	20.3207	21.6945	18.6187	21.3214	22.2555	21.6182	21.8758						1	1	1	NaN	NaN	NaN	NaN	0	NaN	103270000	7	0.638365	0.474015	0.182551	0.721004	-0.263718	-0.377917	0.412218	-0.823916	-0.894133	0.343174	1.10791	1.0467	0.291308	-0.547716	-1.17937	P0CW02	P0CW02	Lymphocyte antigen 6C1
		20.776	18.7934	22.9493	21.6173	18.647	20.4992	20.7242	20.1408	20.0217	20.3016	20.1834	21.5756	20.6249	20.4733						5	5	5	NaN	NaN	NaN	NaN	0	NaN	71072000	26	0.984926	0.649472	0.1767	0.899055	0.142746	0.133433	0.777697	0.166114	0.297988	0.440252	0.865091	0.837974	0.213831	-0.88846	-1.42369	P10107	P10107	Annexin A1
		31.2595	31.3077	30.9595	30.9071	31.083	30.8508	31.1539	31.1902	31.0078	30.7734	30.7374	31.2266	31.0375	30.7353						19	19	19	NaN	NaN	NaN	NaN	0	NaN	66789000000	1674	0.129921	0.657435	0.354486	0.551099	0.108664	0.63874	0.101387	-0.229936	-2.00425	0.113113	0.268912	1.91873	0.661486	0.0696878	0.46499	P10126;P62631	P10126	Elongation factor 1-alpha 1
		23.7934	22.4115	20.5671	22.2191	20.0323	22.2188	22.1327	20.8212	21.3017	23.2242	20.5005	21.6508	23.8067	20.6116						4	4	4	NaN	NaN	NaN	NaN	0	NaN	128780000	6	0.919552	0.595123	0.390875	0.847451	0.224781	0.202577	0.701729	0.374237	0.405718	0.603683	0.572325	0.55362	0.505456	-0.721782	-0.717012	P10300	P10300	T-cell surface glycoprotein CD8 beta chain
		19.5919	19.0771	19.8989	19.1473	19.2987	19.6349	19.9969	19.6019	20.4967	20.2014	19.0053	20.8077	20.5411	19.6445						1	1	1	2	2	2	NaN	NaN	NaN	27045000	13	0.0630541	0.302712	0.695273	0.0602464	-0.902298	-2.41826	0.548954	0.268037	0.642319	0.337153	-0.472311	-1.06118	0.0949067	-0.698025	-2.05607	P10404;P11370	P10404;P11370	MLV-related proviral Env polyprotein;Surface protein;Transmembrane protein;Retrovirus-related Env polyprotein from Fv-4 locus
		21.6922	21.071	20.9461	21.949	21.547	21.3323	21.2618	21.4443	21.4519	21.071	21.7365	21.8161	21.2883	21.683						1	1	1	5	5	5	NaN	0	NaN	88295000	35	0.583893	0.723979	0.602919	0.59006	-0.181223	-0.575216	0.900063	0.0234539	0.132091	0.987941	-0.00521294	-0.0158849	0.246315	-0.199464	-1.31267	P10417-2;P10417	P10417-2;P10417	Apoptosis regulator Bcl-2
		20.9109	21.6847	21.2137	20.9526	20.0466	20.4081	21.3891	21.4386	21.4415	21.4183	21.3255	18.8986	21.3567	18.6951						4	4	4	NaN	NaN	NaN	NaN	0	NaN	57657000	25	0.284448	0.0465958	0.138418	0.0938308	1.54032	2.06503	0.225627	0.574478	1.38165	0.37982	-0.204635	-0.962902	0.216177	1.17048	1.41516	P10518	P10518	Delta-aminolevulinic acid dehydratase
		22.5356	22.7961	23.1598	22.0945	23.0064	22.7832	23.2259	22.9584	23.1032	23.2199	23.151	22.6123	22.8376	23.1292						4	4	4	18	18	18	NaN	0	NaN	244840000	49	0.256251	0.659844	0.0667388	0.499789	-0.213213	-0.727062	0.199913	0.164569	1.47622	0.113218	-0.511537	-1.91801	0.454965	0.133754	0.809585	P10605	P10605	Cathepsin B;Cathepsin B light chain;Cathepsin B heavy chain
		25.0172	25.1321	25.0326	23.7312	24.7853	24.956	24.7443	24.8307	24.6752	23.9972	24.7101	24.7697	23.8172	24.7951						14	4	4	NaN	NaN	NaN	NaN	0	NaN	820150000	46	0.248052	0.827032	0.849391	0.599422	0.267587	0.560344	0.127285	-0.368233	-1.82684	0.569563	0.267404	0.608295	0.237486	0.368416	1.34142	P10630;P10630-2	P10630;P10630-2	Eukaryotic initiation factor 4A-II;Eukaryotic initiation factor 4A-II, N-terminally processed
		26.2457	26.7496	27.8053	26.324	26.6089	27.2551	27.0089	27.1857	27.107	27.1531	27.2507	26.6276	26.6831	26.5603						5	5	5	40	40	40	NaN	0	NaN	3999100000	147	0.996813	0.66745	0.120949	0.726576	0.157478	0.369945	0.414647	0.155593	0.889152	0.40306	-0.389099	-0.913122	0.074454	0.390984	2.2481	P10639	P10639	Thioredoxin
		25.6566	25.5714	25.9987	24.9965	25.7187	25.8072	25.6649	26.0709	25.7989	25.8227	25.5698	25.2772	25.694	25.4655						13	13	13	NaN	NaN	NaN	NaN	0	NaN	1600600000	183	0.594598	0.786496	0.113165	0.784156	0.076886	0.289034	0.530518	-0.0849374	-0.67347	0.5242	-0.174661	-0.684312	0.0703309	0.336484	2.29362	P10711;P10711-2;Q9QVN7	P10711;P10711-2	Transcription elongation factor A protein 1
		23.3037	23.6342	23.3433	23.7829	23.4512	23.5522	23.7506	23.4857	23.7848	23.5656	23.1856	23.7194	24.08	23.4656						5	5	5	NaN	NaN	NaN	NaN	0	NaN	396960000	42	0.482561	0.342303	0.464735	0.29052	-0.239011	-1.18154	0.784906	-0.0479472	-0.287995	0.984698	0.0040377	0.0201568	0.300125	-0.195101	-1.15543	P10852;P10852-2	P10852;P10852-2	4F2 cell-surface antigen heavy chain
		35.6208	35.3439	35.6465	35.9241	35.977	35.8455	35.3925	35.0509	35.7964	35.3265	36.002	35.5104	35.2757	36.2935						19	19	0	NaN	NaN	0	NaN	0	NaN	1599700000000	7387	0.643014	0.833389	0.903791	0.847603	-0.0593325	-0.202372	0.658463	0.141843	0.469516	0.746789	-0.0744921	-0.341249	0.739234	-0.126684	-0.351935	Q6ZWY9;Q64478;P10853;Q8CGP2;P10854;P70696	Q6ZWY9;Q64478;P10853;Q8CGP2;P10854;P70696	Histone H2B type 1-C/E/G;Histone H2B type 1-H;Histone H2B type 1-F/J/L;Histone H2B type 1-P;Histone H2B type 1-M;Histone H2B type 1-A
		26.8157	26.8089	27.3639	27.5526	27.0101	27.4755	26.9104	26.4204	26.9736	27.0212	26.8329	26.7277	26.623	27.1089						5	5	5	NaN	NaN	NaN	NaN	0	NaN	4139700000	217	0.392352	0.408626	0.876161	0.274214	0.315428	1.22766	0.966329	-0.0115498	-0.0443671	0.440631	0.192727	0.837234	0.656602	0.13425	0.472309	P10922	P10922	Histone H1.0;Histone H1.0, N-terminally processed
		27.9328	28.0508	28.9874	28.2023	27.9411	28.9681	28.3345	28.3048	28.6019	28.5964	28.8298	28.3138	28.2305	28.127						10	10	10	NaN	NaN	NaN	NaN	0	NaN	11690000000	403	0.582508	0.479897	0.187662	0.816911	0.0695515	0.244022	0.317853	0.288896	1.10912	0.24228	-0.382701	-1.32569	0.552091	0.163356	0.637089	P11031	P11031	Activated RNA polymerase II transcriptional coactivator p15
		19.715	21.169	21.1053	22.0362	18.1207	21.0735	21.5034	18.0898	20.0411	21.3515	20.5764	20.9388	21.734	17.9474						2	2	2	NaN	NaN	NaN	NaN	0	NaN	54342000	24	0.922196	0.260975	0.6018	0.506903	0.799652	0.714458	0.437476	0.959501	0.843411	0.613858	0.350029	0.537678	0.740651	-0.509878	-0.349927	P11032-2;P11032	P11032-2;P11032	Granzyme A
		25.7599	25.4884	25.1443	25.838	25.5024	25.2927	25.6361	25.838	25.6999	25.5256	25.4094	25.822	26.1721	25.7293						16	16	16	NaN	NaN	NaN	NaN	0	NaN	1532700000	255	0.245311	0.248637	0.213156	0.167812	-0.350154	-1.61231	0.88961	-0.0223262	-0.14602	0.951605	0.0126673	0.0637953	0.11145	-0.340495	-1.93028	P11103;P11103-2	P11103;P11103-2	Poly [ADP-ribose] polymerase 1
		25.911	26.2042	26.1229	26.246	26.1301	26.1283	26.2541	26.2431	25.7322	26.1776	26.0484	26.3952	25.8674	26.0754						11	11	11	NaN	NaN	NaN	NaN	0	NaN	2209900000	297	0.305165	0.358642	0.770028	0.959283	0.00836054	0.053662	0.146202	-0.202872	-1.71926	0.384063	0.134971	0.953635	0.595967	0.0762612	0.565816	P11352	P11352	Glutathione peroxidase 1
		19.354	18.843	21.7643	19.0425	19.488	21.0799	20.7462	21.2593	20.1477	21.5715	21.3158	20.274	21.9734	18.212						1	1	1	3	3	3	NaN	NaN	NaN	61431000	20	0.581699	0.836369	0.224866	0.75386	-0.4022	-0.33129	0.565036	0.368345	0.6157	0.21292	-1.26072	-1.42702	0.652777	0.490172	0.478061	P11438	P11438	Lysosome-associated membrane glycoprotein 1
		30.6228	30.9592	30.787	30.7448	30.654	30.9359	31.0147	31.2308	31.1422	30.9494	30.818	30.7736	31.164	30.6117						44	44	28	NaN	NaN	NaN	NaN	0	NaN	59482000000	2220	0.724742	0.656165	0.215672	0.674323	-0.0713332	-0.445889	0.94828	0.0110156	0.0681865	0.153752	-0.191436	-1.6802	0.603157	0.109088	0.554448	P11499	P11499	Heat shock protein HSP 90-beta
		25.8368	26.0877	26.0381	26.433	25.483	25.9542	26.1104	25.7275	26.0571	26.4076	25.9942	25.8142	26.5642	26.2903						22	22	22	NaN	NaN	NaN	NaN	0	NaN	2028800000	356	0.163564	0.408482	0.277417	0.619865	-0.124009	-0.528339	0.146113	0.334217	1.71973	0.778071	-0.0540924	-0.29747	0.159299	-0.404134	-1.65271	P11835	P11835	Integrin beta-2
		20.022	19.5746	19.6515	18.6411	19.8567	20.3509	21.2002	19.8561	18.6414	19.2701	17.6389	19.6627	20.6331	19.7726						3	3	3	NaN	NaN	NaN	NaN	0	NaN	30876000	4	0.103307	0.0084216	0.364135	0.258691	-0.550465	-1.27393	0.0216498	-1.79915	-3.29266	0.130111	0.955505	1.80977	0.54727	0.293182	0.645137	P11928	P11928	2-5-oligoadenylate synthase 1A
		26.0413	26.0636	25.9579	26.213	25.6938	25.9393	25.8423	26.0959	25.778	25.9201	25.731	25.5089	26.3944	26.0775						7	7	7	NaN	NaN	NaN	NaN	0	NaN	1987500000	195	0.542506	0.864347	0.182481	0.752105	0.0753169	0.333758	0.486233	-0.083149	-0.751436	0.0217437	0.259264	3.28874	0.690304	-0.100798	-0.422368	P11942	P11942	T-cell surface glycoprotein CD3 gamma chain
		27.5007	27.4806	27.1467	27.2968	27.2	27.2219	27.5731	28.0638	27.6517	27.5443	27.2235	27.3175	27.81	27.3243						23	23	23	NaN	NaN	NaN	NaN	0	NaN	5576800000	576	0.787641	0.550786	0.645619	0.482466	-0.127765	-0.758295	0.88029	-0.0415398	-0.158467	0.459783	-0.116979	-0.800438	0.915375	0.0307538	0.111743	P11983;P11983-2	P11983;P11983-2	T-complex protein 1 subunit alpha
		22.5738	18.572	22.5336	23.2208	22.6282	22.6478	22.9168	21.7336	22.6002	22.7302	22.8137	23.0054	22.7993	23.1328						4	4	4	NaN	NaN	NaN	NaN	0	NaN	194050000	66	0.278411	0.415331	0.712426	0.365306	-1.2541	-0.995258	0.485335	0.233094	0.753068	0.467274	-0.989642	-0.786355	0.17593	-0.497546	-1.57564	P12265	P12265	Beta-glucuronidase
		20.4282	20.3516	20.6243	19.1286	20.7759	20.4586	21.0205	21.294	20.4744	19.9717	20.7132	20.8689	20.8985	20.6151						2	2	2	NaN	NaN	NaN	NaN	0	NaN	48586000	10	0.75282	0.0329431	0.500052	0.166956	-0.661014	-1.61628	0.132286	-0.500803	-1.79689	0.591153	-0.253256	-0.573473	0.69433	0.0930446	0.416486	P12367	P12367	cAMP-dependent protein kinase type II-alpha regulatory subunit
		23.6261	24.0276	23.0421	23.1312	23.8224	23.3502	23.7311	23.7252	23.372	24.0838	23.0352	23.4789	23.294	23.1207						6	5	5	NaN	9	9	NaN	0	NaN	363380000	78	0.448348	0.886793	0.346402	0.601394	0.15886	0.557228	0.600427	-0.160228	-0.558754	0.918743	-0.0402328	-0.107273	0.0633755	0.35932	2.37731	P12382	P12382	ATP-dependent 6-phosphofructokinase, liver type
		25.1878	25.3889	25.9513	25.7372	25.2244	25.7063	25.4829	25.7703	26.3206	26.2149	25.617	25.8098	26.5361	25.5139						3	3	3	NaN	NaN	NaN	NaN	0	NaN	1869100000	244	0.0502486	0.793026	0.850985	0.287292	-0.38694	-1.19048	0.0839048	0.504879	2.1532	0.13638	-0.484542	-1.77323	0.223475	-0.407277	-1.38916	P12787	P12787	Cytochrome c oxidase subunit 5A, mitochondrial
		25.5002	25.3084	25.2438	25.7854	25.5275	25.5327	25.0941	25.1621	25.2735	24.7833	25.1384	25.7047	24.8952	25.6544						5	5	5	NaN	NaN	NaN	NaN	0	NaN	1299400000	159	0.363255	0.638655	0.162489	0.880831	0.0413373	0.157744	0.212098	-0.264026	-1.43005	0.0909931	0.394378	2.08919	0.745141	-0.0890152	-0.343576	P12815;P12815-2	P12815;P12815-2	Programmed cell death protein 6
		28.5065	28.5175	28.2319	28.5795	28.5719	28.4707	28.5389	28.2954	28.4787	28.3534	28.2626	28.5305	28.6369	28.5308						17	17	17	44	44	44	NaN	0	NaN	11025000000	584	0.982878	0.18759	0.177831	0.31572	-0.107216	-1.11457	0.298034	-0.104319	-1.16105	0.413868	0.093948	0.890747	0.273504	-0.0968444	-1.22972	P12970	P12970	60S ribosomal protein L7a
		25.3967	25.434	25.4595	25.565	25.5218	25.3707	25.3565	25.8161	25.305	25.1448	25.4491	25.2368	25.1686	25.4048						17	7	7	NaN	14	14	NaN	0	NaN	1336000000	177	0.0306372	0.834362	0.625955	0.0444911	0.193728	2.66732	0.1982	-0.216669	-1.48293	0.11143	0.164174	1.93042	0.137261	0.246223	1.76823	P13020-2;P13020	P13020-2;P13020	Gelsolin
		26.4321	26.4187	26.7709	26.7229	26.2582	26.3305	26.8115	26.4675	26.7157	26.5336	26.1944	26.1155	26.8023	26.512						14	14	14	NaN	NaN	NaN	NaN	0	NaN	2823300000	328	0.73917	0.621673	0.689152	0.607237	0.109525	0.548034	0.943975	0.0142934	0.0738736	0.561831	0.104894	0.620966	0.966817	-0.00966295	-0.0437234	P13379	P13379	T-cell surface glycoprotein CD5
		22.46	23.106	22.4877	22.496	23.2893	22.7907	22.8304	22.9403	22.7411	22.9725	23.0082	23.2975	21.4101	23.2551						6	6	6	NaN	NaN	NaN	NaN	0	NaN	234590000	42	0.947649	0.790315	0.336499	0.976873	-0.0168325	-0.030468	0.729293	-0.055398	-0.366068	0.230775	-0.26987	-1.36395	0.590966	0.308436	0.573771	P13439	P13439	Uridine 5-monophosphate synthase;Orotate phosphoribosyltransferase;Orotidine 5-phosphate decarboxylase
		20.6869	19.9677	21.2424	20.8058	20.7024	21.1965	21.0947	21.1521	20.8339	20.599	19.0614	20.8611	21.0348	20.931						5	5	5	NaN	NaN	NaN	NaN	0	NaN	57065000	26	0.31971	0.0886321	0.487338	0.437059	-0.2666	-0.84423	0.131566	-0.871694	-1.80113	0.403852	0.510916	0.911467	0.532403	0.094178	0.670254	P13864-2;P13864	P13864-2;P13864	DNA (cytosine-5)-methyltransferase 1
		23.1182	24.6611	24.5793	19.8685	18.2142	24.9134	20.1204	22.6643	25.668	25.7489	25.3632	24.582	24.3127	25.1129						1	1	1	9	9	9	NaN	NaN	NaN	621690000	22	0.0259005	0.25899	0.771341	0.282735	-1.61244	-1.20326	0.0637499	4.11524	2.37256	0.114626	-2.53657	-1.90837	0.126611	-3.19111	-1.83096	P14069	P14069	Protein S100-A6
		22.871	22.6637	22.8125	22.9989	22.7074	22.7979	22.8342	22.295	22.2598	22.3605	22.8377	22.6156	22.5584	22.7736						4	4	4	NaN	NaN	NaN	NaN	0	NaN	220040000	51	0.150613	0.787326	0.171012	0.115062	0.187315	1.90541	0.447043	-0.172613	-0.824783	0.0946865	0.35048	2.0579	0.954166	0.00944837	0.060415	P14094	P14094	Sodium/potassium-transporting ATPase subunit beta-1
		27.1211	26.9025	26.6716	26.7991	26.9617	26.8062	26.8876	27.1695	26.8764	26.5195	26.3274	26.7384	27.1174	26.6651						4	4	4	NaN	NaN	NaN	NaN	0	NaN	3591100000	139	0.101558	0.187497	0.444724	0.845862	0.0332691	0.204722	0.0662723	-0.381828	-2.34131	0.148838	0.299136	1.7054	0.47197	0.11596	0.777612	P14115	P14115	60S ribosomal protein L27a
		27.4202	27.3185	27.014	27.3239	27.1027	27.1361	27.3374	27.584	27.4905	27.2464	27.1734	27.1359	27.3781	26.9767						8	8	8	50	50	50	NaN	0	NaN	4859400000	251	0.669931	0.653857	0.461362	0.493232	0.105568	0.738793	0.933887	0.0134079	0.0872133	0.80474	-0.0343095	-0.260673	0.474161	0.12647	0.773553	P14131	P14131	40S ribosomal protein S16
		28.3567	28.1713	28.1057	28.4989	28.2694	28.4343	28.229	28.3422	28.3595	28.143	28.5036	28.5447	28.5266	28.4381						14	14	14	NaN	NaN	NaN	NaN	0	NaN	10057000000	480	0.145635	0.242258	0.398894	0.100367	-0.219993	-2.01218	0.87751	0.0166459	0.162186	0.719378	-0.0522485	-0.380249	0.027775	-0.184391	-3.07028	P14148	P14148	60S ribosomal protein L7
		30.5355	30.6626	30.7576	30.1193	30.507	30.393	30.478	30.686	30.4608	30.3417	30.5088	30.0811	29.5371	30.1969						14	14	14	NaN	NaN	NaN	NaN	0	NaN	42804000000	1088	0.025963	0.115499	0.0777978	0.0588141	0.580362	2.43778	0.390204	-0.0788948	-0.940367	0.654317	0.0816352	0.475743	0.0262469	0.577621	3.12018	P14152	P14152	Malate dehydrogenase, cytoplasmic
		28.7567	28.7949	28.4788	28.6289	28.7624	28.59	28.6907	29.0096	28.6083	28.389	28.3554	28.7486	28.8579	28.775						15	15	15	NaN	NaN	NaN	NaN	0	NaN	12784000000	663	0.259512	0.023168	0.141614	0.206381	-0.129016	-1.45139	0.0544723	-0.312266	-2.50027	0.103091	0.213942	1.99121	0.79019	-0.0306918	-0.280692	P14206	P14206	40S ribosomal protein SA
		28.8444	29.1609	29.6057	29.3877	28.9769	29.5074	29.4899	29.2872	29.4746	29.3773	29.4804	29.2064	29.7599	29.4201						24	24	24	NaN	NaN	NaN	NaN	0	NaN	21006000000	953	0.248068	0.749097	0.867462	0.407613	-0.212444	-0.903639	0.426055	0.128734	0.866056	0.363706	-0.194402	-0.998888	0.493337	-0.146776	-0.738605	P14211	P14211	Calreticulin
		19.1366	18.6632	18.905	19.0829	18.5843	19.6176	19.7835	19.5614	19.8631	22.6379	17.6414	21.03	23.5247	19.8517						1	1	1	NaN	NaN	NaN	NaN	NaN	NaN	40593000	7	0.0671165	0.28815	0.540735	0.039971	-2.52184	-2.75712	0.620011	0.660769	0.528114	0.406867	-1.10052	-0.905187	0.0825469	-2.08209	-2.16612	P14220	P14220	Glycophorin-A
		25.0503	25.4843	25.9077	25.0021	25.1191	25.9046	25.5026	26.0397	25.0445	24.5671	24.6866	24.9017	25.8068	24.715						13	7	6	38	NaN	NaN	NaN	0	NaN	1295900000	128	0.0407599	0.194512	0.843159	0.585483	0.219909	0.58254	0.0241212	-0.875426	-3.19531	0.0853412	0.595026	2.13978	0.239131	0.50031	1.33599	P14429;P14431	P14429;P14431	H-2 class I histocompatibility antigen, Q7 alpha chain;H-2 class I histocompatibility antigen, Q9 alpha chain
		21.3786	21.2155	21.1793	21.7563	20.1725	21.4554	21.8974	18.6568	21.8365	21.9533	22.0864	21.9515	21.5444	19.9516						9	2	1	NaN	8	NaN	NaN	0	NaN	72334000	13	0.272156	0.131562	0.979038	0.680424	0.233238	0.436877	0.162693	1.41321	1.63635	0.0183744	-0.576312	-3.44307	0.572938	-0.603664	-0.602798	P14430	P14430	H-2 class I histocompatibility antigen, Q8 alpha chain
		19.1442	18.7583	20.7402	22.4735	20.2991	20.4293	20.9358	20.6836	19.4258	19.2946	20.1106	20.0499	21.0819	20.2389						2	1	1	NaN	NaN	NaN	NaN	0	NaN	36541000	3	0.473466	0.333879	0.626335	0.87064	-0.177873	-0.171387	0.0151648	-0.976625	-3.62343	0.543121	0.668674	0.652101	0.695414	0.130077	0.414904	P14438;P14434	P14438;P14434	H-2 class II histocompatibility antigen, A-U alpha chain;H-2 class II histocompatibility antigen, A-B alpha chain
		22.3228	22.5374	21.4855	21.8309	22.4367	22.1819	21.7587	21.1954	21.7115	21.5845	21.1933	22.9922	21.826	21.9994						6	6	6	NaN	NaN	NaN	NaN	0	NaN	131760000	31	0.761583	0.378334	0.116796	0.605085	-0.228378	-0.551415	0.304104	-0.396774	-1.14483	0.137619	0.54774	1.76621	0.430092	-0.379344	-0.858	P14576;P14576-2	P14576	Signal recognition particle 54 kDa protein
		25.6046	25.7595	25.5198	25.9322	25.8182	25.8764	26.07	25.85	25.9651	25.8001	25.7723	25.8649	26.0417	25.9641						14	14	14	NaN	NaN	NaN	NaN	0	NaN	1750800000	219	0.202141	0.0452949	0.549401	0.0804813	-0.252873	-2.1862	0.52137	-0.057817	-0.689198	0.285706	-0.141792	-1.19491	0.533034	-0.0532645	-0.669178	P14685	P14685	26S proteasome non-ATPase regulatory subunit 3
		30.7062	30.5869	30.7601	30.8109	30.7999	31.023	30.5923	31.1545	30.8883	30.7377	30.9981	30.7488	31.3709	30.9311						49	49	44	NaN	NaN	NaN	NaN	0	NaN	60455000000	2635	0.245113	0.184618	0.884579	0.127129	-0.3009	-1.82779	0.916115	-0.017687	-0.110761	0.120828	-0.158684	-1.86733	0.584215	-0.124529	-0.584575	P14733	P14733	Lamin-B1
		29.9496	30.1055	30.1344	29.6949	29.8717	29.8946	30.0588	30.2666	30.2925	30.1973	30.2238	29.6601	29.8256	29.8782						46	46	46	NaN	NaN	NaN	NaN	0	NaN	32594000000	1578	0.856612	0.0834796	0.01518	0.221391	0.183132	1.3965	0.109588	0.214939	1.94343	0.079359	-0.266759	-2.19734	0.110285	0.234952	1.93848	P14824;P97429	P14824	Annexin A6
		28.6461	28.4211	28.2311	28.553	28.3872	28.2688	28.0138	28.519	28.1188	28.1945	28.1588	28.4297	28.3256	28.2824						12	12	12	NaN	NaN	NaN	NaN	0	NaN	9830800000	556	0.163564	0.873142	0.064854	0.346513	0.116935	1.03877	0.325803	-0.139842	-1.08908	0.0367631	0.305463	2.82795	0.727856	-0.0486865	-0.368117	P14869	P14869	60S acidic ribosomal protein P0
		22.8511	22.8954	23.0087	22.5491	22.8084	22.0287	21.8453	23.5182	22.6109	22.5536	22.7343	22.7301	22.5927	21.82						4	4	4	NaN	NaN	NaN	NaN	0	NaN	198170000	46	0.507831	0.33295	0.964781	0.152437	0.44516	1.68686	0.863378	0.0827654	0.181131	0.181109	0.193142	1.5531	0.754739	0.169253	0.330053	P15105	P15105	Glutamine synthetase
		20.6281	20.8525	20.4283	20.3256	20.5071	20.0832	20.7914	20.3093	20.7603	19.5698	20.7506	21.839	20.3363	20.2731						4	3	3	NaN	7	7	NaN	0	NaN	52107000	10	0.746148	0.693244	0.336268	0.591747	-0.257505	-0.572526	0.874295	-0.0625121	-0.16649	0.603486	0.198406	0.553931	0.434906	-0.393399	-0.848465	P15307	P15307	Proto-oncogene c-Rel
		28.5384	28.7564	29.0483	28.201	28.7184	28.8526	29.1483	28.9446	29.1172	28.8127	28.8573	28.5737	28.333	28.632						12	12	6	NaN	NaN	NaN	NaN	0	NaN	14913000000	512	0.682485	0.889763	0.0237576	0.607493	0.123154	0.547633	0.925657	0.013063	0.0981093	0.251215	-0.292995	-1.29712	0.0278941	0.403086	3.06652	P15532	P15532	Nucleoside diphosphate kinase A
		27.2558	27.158	27.1014	27.5881	27.2378	27.7401	27.2296	27.5653	27.6511	27.4752	27.4394	27.5215	27.3538	27.2141						8	8	8	NaN	NaN	NaN	NaN	0	NaN	5133800000	362	0.463347	0.803054	0.164983	0.582778	-0.0872917	-0.586885	0.641489	0.0787001	0.495142	0.139102	-0.246056	-1.75788	0.651328	0.0800638	0.480245	P15702	P15702	Leukosialin
		34.9765	35.2377	35.3507	35.194	35.4486	34.928	33.0601	34.4337	34.8409	34.3136	35.0336	34.4497	34.8826	35.9181						25	25	10	NaN	NaN	NaN	NaN	0	NaN	989160000000	3117	0.836961	0.490412	0.174511	0.788905	0.106228	0.282468	0.696378	0.261743	0.413499	0.0721424	0.460373	2.27328	0.42407	-0.615888	-0.870042	P15864	P15864	Histone H1.2
		27.1506	27.2709	28.1459	26.9882	27.5057	27.5027	27.8521	27.5637	27.6344	27.606	28.0306	27.9153	27.5899	27.8432						7	7	7	NaN	NaN	NaN	NaN	0	NaN	6399600000	267	0.152063	0.455138	0.597939	0.26947	-0.393895	-1.24154	0.363631	0.150982	0.99906	0.311477	-0.368135	-1.12551	0.227413	-0.176741	-1.37546	P16045	P16045	Galectin-1
		25.4355	25.4061	25.4309	25.2857	25.0934	25.0631	25.6069	25.3647	25.5863	25.4411	25.5518	25.2431	25.3412	25.2136						5	4	4	NaN	NaN	NaN	NaN	0	NaN	1253800000	86	0.47887	0.0590789	0.373839	0.0659534	0.123578	2.34519	0.176948	0.244384	1.57116	0.0567572	-0.136842	-2.46674	0.921409	0.0160354	0.103739	P16125	P16125	L-lactate dehydrogenase B chain
		21.9326	21.9917	21.503	22.2685	22.1268	20.8035	21.7976	20.7573	20.4965	21.7658	21.3373	22.3561	20.8417	21.2836						2	2	2	NaN	NaN	NaN	NaN	0	NaN	91713000	40	0.38748	0.577238	0.232305	0.352959	0.430156	1.02363	0.753392	-0.171424	-0.331948	0.10321	0.724089	1.9903	0.834788	-0.122509	-0.219706	P16254	P16254	Signal recognition particle 14 kDa protein;Signal recognition particle 14 kDa protein, N-terminally processed
		21.0606	20.7263	20.5844	19.0308	18.5657	20.2765	18.9498	20.75	21.607	21.2341	21.1583	21.4554	20.851	18.6028						2	2	2	NaN	NaN	NaN	NaN	0	NaN	42041000	26	0.163971	0.148974	0.780162	0.960028	0.0474726	0.052679	0.0426737	1.69759	2.70216	0.131941	-0.982559	-1.79892	0.514926	-0.667561	-0.70039	P16332	P16332	Methylmalonyl-CoA mutase, mitochondrial
		27.5894	27.4799	27.5705	27.1738	27.5274	27.3459	27.7011	27.8776	27.4068	27.4059	27.4164	27.226	27.2269	27.1538						18	18	18	NaN	NaN	NaN	NaN	0	NaN	5509100000	366	0.028623	0.979686	0.0659421	0.081954	0.251122	2.17183	0.192861	-0.203276	-1.5042	0.717227	0.0436519	0.383337	0.0298758	0.410745	3.00649	P16460	P16460	Argininosuccinate synthase
		28.2973	28.0176	27.9018	28.0054	28.1356	28.0199	28.0203	28.2023	28.2306	28.0869	28.1475	27.917	28.2584	28.2483						78	78	77	NaN	NaN	NaN	NaN	0	NaN	8490000000	1023	0.356747	0.831073	0.734563	0.559618	-0.0857399	-0.624612	0.386169	0.0604784	0.949066	0.391338	-0.0994932	-0.937935	0.683141	-0.0467251	-0.432876	P16546-2;P16546	P16546-2;P16546	Spectrin alpha chain, non-erythrocytic 1
		22.134	21.605	21.8628	21.8591	22.0566	21.5348	22.1302	22.116	21.4548	21.3028	22.2665	22.4615	22.9876	22.2479						3	3	3	NaN	NaN	NaN	NaN	0	NaN	141000000	45	0.294468	0.0411351	0.0599525	0.0260292	-0.700413	-3.12756	0.38867	-0.284706	-0.943664	0.527794	0.19056	0.678135	0.0593341	-0.606266	-2.43064	P16675	P16675	Lysosomal protective protein;Lysosomal protective protein 32 kDa chain;Lysosomal protective protein 20 kDa chain
		31.5383	31.5747	31.3113	31.1508	31.3324	31.2358	31.5419	31.2107	31.4109	31.0559	30.888	31.6302	31.2715	31.1328						17	17	17	NaN	NaN	NaN	NaN	0	NaN	83532000000	2009	0.287367	0.60841	0.239882	0.786418	0.0489524	0.285904	0.234337	-0.211911	-1.35192	0.175954	0.275476	1.57553	0.92748	-0.0146119	-0.0956943	P16858;Q64467	P16858	Glyceraldehyde-3-phosphate dehydrogenase
		26.5317	26.9706	27.4026	27.0748	26.7066	27.4455	27.0322	27.3297	27.6021	27.6619	27.1408	26.6534	27.4211	26.6853						8	8	3	NaN	NaN	NaN	NaN	0	NaN	4326400000	258	0.504926	0.421754	0.105157	0.811693	0.0750311	0.25115	0.214886	0.339756	1.41984	0.120719	-0.473329	-1.86803	0.499761	0.208605	0.727112	P17095	P17095	High mobility group protein HMG-I/HMG-Y
		24.1409	24.7829	25.2966	24.8291	24.8166	25.2424	25.0326	24.3739	24.8236	25.0123	24.8113	24.4894	24.4291	24.7532						7	2	2	51	NaN	NaN	NaN	0	NaN	881660000	22	0.620511	0.671968	0.273375	0.515004	0.205177	0.700253	0.946422	0.0159945	0.070641	0.692361	-0.119998	-0.41936	0.24543	0.30918	1.31551	P17095-1	P17095-1	High mobility group protein HMG-I/HMG-Y
		30.7674	30.9449	31.1212	30.4938	30.9227	30.7965	31.0403	31.0859	30.6822	30.6458	30.8876	30.7753	30.5727	30.7468						25	25	25	NaN	NaN	NaN	NaN	0	NaN	58652000000	1937	0.0964341	0.56806	0.402567	0.46005	0.133569	0.799931	0.0747468	-0.222808	-2.24497	0.607605	0.0932937	0.547456	0.0370153	0.263083	2.82214	P17182;P21550;P17183	P17182	Alpha-enolase
		28.2263	27.7943	27.6817	28.3117	28.0833	27.6898	27.7449	27.6303	26.8153	27.5647	27.3489	28.4397	27.187	28.2575						10	9	9	NaN	NaN	NaN	NaN	0	NaN	7474100000	745	0.208495	0.41318	0.0576334	0.915087	0.0420955	0.112124	0.0576252	-0.5441	-2.45438	0.0338013	0.760517	2.89973	0.637973	-0.174321	-0.500496	P17225	P17225	Polypyrimidine tract-binding protein 1
		23.9759	23.237	23.0596	23.2297	23.2626	22.8736	23.4037	23.0052	23.0468	22.9947	22.9594	23.4992	23.2835	23.0854						11	11	6	NaN	NaN	NaN	NaN	0	NaN	284440000	64	0.473986	0.932335	0.107167	0.755143	0.0861781	0.329486	0.388252	-0.135934	-0.944565	0.182622	0.375244	1.54663	0.418966	-0.153132	-0.880351	P17426-2;P17426	P17426-2;P17426	AP-2 complex subunit alpha-1
		22.8561	21.8177	21.7122	21.0067	21.8508	21.5844	22.4156	22.2653	21.9564	21.3316	22.1145	21.8068	21.6374	21.7724						9	4	4	NaN	NaN	NaN	NaN	0	NaN	120180000	12	0.548955	0.781305	0.664919	0.818976	0.10928	0.241204	0.482866	-0.228169	-0.757564	0.92729	0.0473342	0.095946	0.261601	0.290115	1.26506	P17427	P17427	AP-2 complex subunit alpha-2
		27.1173	27.2236	26.6523	27.3428	26.8252	26.7521	27.1071	26.9416	27.2649	27.3615	26.9565	26.7959	27.4693	27.1509						26	26	26	NaN	NaN	NaN	NaN	0	NaN	4022700000	456	0.246094	0.383965	0.670274	0.829945	-0.054705	-0.226277	0.0900591	0.287811	2.09732	0.615202	-0.110294	-0.535584	0.268788	-0.232222	-1.24356	P17710-3;P17710-4;P17710;P17710-2;Q91W97;O08528	P17710-3;P17710-4;P17710;P17710-2	Hexokinase-1
		29.7362	29.7386	30.1719	29.5127	30.2792	29.9591	29.8751	30.4431	29.5305	29.5631	29.7163	30.0605	29.9366	30.0698						11	11	11	NaN	NaN	NaN	NaN	0	NaN	34591000000	1737	0.225677	0.00855927	0.772626	0.222892	-0.232455	-1.39121	0.0228471	-0.535824	-3.24402	0.322667	0.186562	1.09694	0.503424	0.116808	0.720607	P17742	P17742	Peptidyl-prolyl cis-trans isomerase A;Peptidyl-prolyl cis-trans isomerase A, N-terminally processed
		27.4184	27.7888	28.0563	27.2875	27.6882	27.7917	27.9725	28.2905	27.7248	27.8156	27.8247	27.7622	27.7676	27.7343						12	12	12	NaN	NaN	NaN	NaN	0	NaN	7107100000	421	0.909616	0.255719	0.23292	0.597555	-0.116931	-0.563298	0.395249	-0.147341	-0.929592	0.503629	-0.150612	-0.720243	0.299595	0.181021	1.15685	P17751	P17751	Triosephosphate isomerase
		21.9305	19.1313	25.5098	19.8669	19.5319	20.1507	19.5707	20.5549	19.4723	18.4838	20.1009	21.7042	20.395	19.4981						2	2	2	NaN	NaN	NaN	NaN	0	NaN	187370000	10	0.383462	0.638218	0.153979	0.570091	1.07719	0.607433	0.275084	-0.599735	-1.22514	0.250133	2.25732	1.30053	0.384875	-0.580393	-0.95187	P17897;P08905	P17897;P08905	Lysozyme C-1;Lysozyme C-2
		22.5312	23.0302	22.8834	22.6019	22.8818	22.6539	23.2433	22.9845	22.7718	23.0137	22.5685	23.2469	23.187	22.9552						4	4	4	NaN	NaN	NaN	NaN	0	NaN	242120000	68	0.397141	0.0608772	0.504353	0.0668301	-0.368044	-2.33457	0.425936	-0.156185	-0.866295	0.901025	-0.0229975	-0.130811	0.297954	-0.188861	-1.16127	P17918	P17918	Proliferating cell nuclear antigen
		25.1463	24.9437	25.6598	25.4761	25.3383	25.677	25.6159	25.2985	25.8104	25.9367	25.7332	25.4351	25.8206	25.8122						5	5	5	NaN	NaN	NaN	NaN	0	NaN	1493700000	211	0.015846	0.744228	0.239834	0.139576	-0.382837	-1.75524	0.0388286	0.344352	2.7816	0.0457535	-0.520315	-2.64403	0.240772	-0.206874	-1.3306	P18181	P18181	CD48 antigen
		25.6516	25.7198	25.6581	25.9411	25.426	25.414	25.7655	25.9346	26.0505	25.9427	25.6397	26.0006	26.3717	25.8305						8	8	8	NaN	NaN	NaN	NaN	0	NaN	1759800000	188	0.0404282	0.87078	0.245492	0.0916844	-0.324929	-2.08323	0.244437	0.242582	1.3187	0.348582	-0.134973	-1.03388	0.0860839	-0.432538	-2.13293	P18242	P18242	Cathepsin D
		24.0126	24.0698	23.777	23.3964	24.3498	23.884	23.7995	24.2959	23.2535	23.4302	23.4848	24.0718	24.1868	23.982						5	5	5	NaN	NaN	NaN	NaN	0	NaN	480210000	108	0.128364	0.00545574	0.131765	0.215095	-0.26625	-1.41908	0.0110188	-0.692786	-3.93465	0.0759608	0.424424	2.23214	0.990751	0.00211191	0.0121831	P18337	P18337	L-selectin
		23.2103	23.531	23.2828	22.8368	23.2713	23.4686	22.9257	24.8701	23.6388	23.8891	23.1598	23.2547	24.4468	23.2241						3	3	3	NaN	NaN	NaN	NaN	0	NaN	389480000	62	0.599741	0.419324	0.615865	0.309442	-0.426603	-1.13081	0.899284	-0.0713671	-0.133129	0.218401	-0.347327	-1.40715	0.990114	-0.00790803	-0.0130223	P18608	P18608	Non-histone chromosomal protein HMG-14
		23.0364	21.653	22.6463	22.0693	22.1758	22.5923	22.2565	22.6699	22.134	22.2084	22.3616	22.6743	22.2102	22.6752						9	5	4	NaN	NaN	NaN	NaN	0	NaN	180440000	40	0.96189	0.443674	0.618742	0.679264	-0.168646	-0.438587	0.27665	-0.188953	-1.22062	0.763175	0.116584	0.318227	0.64061	-0.096276	-0.496479	P18653	P18653	Ribosomal protein S6 kinase alpha-1
		25.2753	25.5485	25.3133	24.9025	25.1073	25.1742	25.2811	25.4514	24.9836	23.8288	25.4181	25.051	24.8254	25.2778						17	17	12	NaN	NaN	NaN	NaN	0	NaN	1177600000	153	0.141187	0.577078	0.500552	0.327351	0.208525	1.08523	0.265177	-0.509981	-1.2543	0.280679	0.5164	1.20909	0.210609	0.202106	1.43555	P18654;Q8C0P0-2;Q7TPS0-2;Q7TPS0-3;Q7TPS0;Q8C0P0;Q811L6-2;Q9R1L5;Q60592;Q811L6	P18654	Ribosomal protein S6 kinase alpha-3
		31.209	31.3566	31.6811	30.8335	31.5187	31.3785	31.6396	31.8591	31.3162	31.5166	31.4404	31.0529	31.0335	31.1812						20	20	19	NaN	NaN	NaN	NaN	0	NaN	85486000000	1598	0.182779	0.725835	0.0232971	0.431707	0.180838	0.854793	0.236885	-0.174597	-1.34341	0.502353	-0.154353	-0.722505	0.0100282	0.509788	4.02929	P18760;P45591	P18760	Cofilin-1
		24	23.1894	23.0041	23.3855	23.3372	22.6173	23.4746	23.5538	23.1376	23.2718	22.7498	23.3811	23.4232	23.5						13	13	13	NaN	NaN	NaN	NaN	0	NaN	317510000	60	0.699682	0.6889	0.197388	0.88262	-0.0400062	-0.155353	0.529563	-0.192595	-0.675104	0.287959	0.341647	1.18862	0.491967	-0.189058	-0.741067	P19096	P19096	Fatty acid synthase;[Acyl-carrier-protein] S-acetyltransferase;[Acyl-carrier-protein] S-malonyltransferase;3-oxoacyl-[acyl-carrier-protein] synthase;3-oxoacyl-[acyl-carrier-protein] reductase;3-hydroxyacyl-[acyl-carrier-protein] dehydratase;Enoyl-[acyl-carrier-protein] reductase;Oleoyl-[acyl-carrier-protein] hydrolase
		26.7304	26.8563	26.4519	26.4983	26.8049	26.5942	26.4897	27.1879	26.7836	26.7899	26.6655	26.8839	27.4176	26.6857						8	8	8	NaN	NaN	NaN	NaN	0	NaN	3828700000	205	0.260864	0.219932	0.695612	0.1538	-0.361516	-1.67996	0.90671	-0.0228707	-0.12325	0.387091	-0.112102	-0.947072	0.420633	-0.226542	-0.876972	P19253	P19253	60S ribosomal protein L13a
		23.62	24.0509	25.2565	25.071	22.899	24.5153	23.2728	24.2315	24.905	23.723	24.9056	24.324	24.4876	23.7582						6	6	6	NaN	NaN	NaN	NaN	0	NaN	661270000	55	0.545256	0.152424	0.564812	0.564949	0.309684	0.615842	0.222525	0.781507	1.3925	0.984635	-0.0115811	-0.0202395	0.391017	-0.460242	-0.938622	P19536	P19536	Cytochrome c oxidase subunit 5B, mitochondrial
		26.7225	26.8742	27.2628	27.0096	26.9074	27.4461	26.9009	27.2301	27.3271	27.0894	27.316	27.1851	27.6318	27.1367						8	8	8	NaN	NaN	NaN	NaN	0	NaN	4719600000	450	0.0921341	0.364794	0.759003	0.123018	-0.350602	-1.85335	0.501475	0.123078	0.724063	0.124821	-0.276936	-1.84203	0.381542	-0.196744	-0.959131	P19783	P19783	Cytochrome c oxidase subunit 4 isoform 1, mitochondrial
		28.7017	29.1361	29.2604	28.4873	29.2395	29.1907	29.4488	29.5147	29.1715	29.2538	29.1175	28.8444	29.36	28.7819						19	19	19	NaN	NaN	NaN	NaN	0	NaN	18119000000	1088	0.812985	0.228597	0.0471212	0.722703	-0.0990534	-0.375484	0.151256	-0.167492	-1.6929	0.247196	-0.284587	-1.30985	0.106184	0.353025	1.96808	P19973;P19973-2	P19973;P19973-2	Lymphocyte-specific protein 1
		28.3837	28.8805	29.1794	29.2632	28.4631	28.972	29.216	28.7127	29.2028	29.2167	28.9729	28.8909	29.376	28.9476						30	28	28	NaN	NaN	NaN	NaN	0	NaN	15999000000	1423	0.225257	0.664305	0.938972	0.611949	-0.144783	-0.540657	0.213434	0.289823	1.42514	0.441505	-0.204104	-0.835528	0.364309	-0.230503	-0.997519	P20029	P20029	78 kDa glucose-regulated protein
		25.421	25.543	25.2677	25.8144	25.1324	25.2422	25.9292	25.5543	25.8638	25.9206	25.8062	25.4376	26.1665	25.9806						15	15	15	NaN	NaN	NaN	NaN	0	NaN	1529400000	219	0.0375572	0.86136	0.888243	0.18605	-0.35	-1.53217	0.120398	0.399002	1.8701	0.0530305	-0.351971	-2.52222	0.214978	-0.39703	-1.41951	P20060	P20060	Beta-hexosaminidase subunit beta
		23.4661	25.0641	27.9055	23.351	25.7483	25.6325	21.3521	24.5244	23.9143	25.7595	26.4177	25.5759	23.4234	25.7111						3	3	2	NaN	NaN	NaN	NaN	0	NaN	1782400000	55	0.618043	0.576542	0.931649	0.976569	0.0432177	0.0308681	0.476831	1.04952	0.768626	0.778194	-0.417147	-0.297299	0.683419	-0.589159	-0.432466	P20065-2;CON__P21752;P20065	P20065-2	Thymosin beta-4;Hematopoietic system regulatory peptide
		26.9157	26.8595	26.9606	27.1953	27.1471	26.945	27.3148	26.8173	27.0985	27.482	27.194	27.1044	26.8935	27.2452						7	7	7	NaN	NaN	NaN	NaN	0	NaN	4256600000	316	0.169203	0.741457	0.244964	0.457733	-0.0982857	-0.80432	0.266791	0.20213	1.24948	0.0878222	-0.275425	-2.11715	0.878607	-0.0249906	-0.160718	P20108	P20108	Thioredoxin-dependent peroxide reductase, mitochondrial
		31.0251	30.9168	31.2901	31.1231	31.1237	31.2769	30.8121	31.3721	31.5548	31.3952	31.5511	31.3307	31.5392	31.2935						41	40	37	NaN	NaN	NaN	NaN	0	NaN	77599000000	2692	0.00622533	0.872532	0.390141	0.0462889	-0.29904	-2.63437	0.0666011	0.354184	2.33733	0.0105886	-0.411653	-3.97449	0.187976	-0.241572	-1.52416	P20152;P31001;P15331-3;P15331;P15331-2;P03995-2;P03995;P46660;P08553	P20152	Vimentin
		22.6538	23.0449	23.364	20.9256	23	23.2039	22.466	23.7054	22.7765	23.0628	22.8737	23.6137	23.5707	22.6345						13	2	2	NaN	NaN	NaN	NaN	0	NaN	269780000	60	0.459921	0.215762	0.771088	0.315964	-0.775863	-1.11395	0.569505	-0.189483	-0.608388	0.556707	-0.407239	-0.629425	0.676252	-0.179141	-0.443034	P21107;P58771-2;P58771;P58774-2;CON__Q3SX28	P21107	Tropomyosin alpha-3 chain
		27.4574	27.2431	27.5356	27.7511	27.4673	27.8002	27.2443	27.9666	27.6281	27.598	27.9175	27.4348	27.9385	27.6404						31	26	26	NaN	NaN	NaN	NaN	0	NaN	6179400000	780	0.347465	0.710694	0.556756	0.362969	-0.174396	-1.00057	0.670713	0.0949257	0.45124	0.207851	-0.217708	-1.44585	0.829835	-0.0516136	-0.226426	P21619;P21619-2	P21619;P21619-2	Lamin-B2
		25.6695	25.2819	24.7008	25.7546	25.3186	25.3712	25.2336	25.0868	25.3489	25.357	25.5285	25.5528	25.4241	25.5689						13	13	13	NaN	NaN	NaN	NaN	0	NaN	1311700000	177	0.30756	0.936343	0.514052	0.592923	-0.163604	-0.570653	0.131775	0.158928	1.7999	0.84389	-0.0597927	-0.207386	0.0247857	-0.262739	-3.17105	P21958	P21958	Antigen peptide transporter 1
		22.4402	22.3649	22.5491	22.9318	22.3892	22.8412	22.7822	22.0305	22.3155	22.4317	22.5491	22.3227	22.1561	22.8303						2	2	2	NaN	NaN	NaN	NaN	0	NaN	182300000	57	0.52259	0.841153	0.844471	0.57562	0.13511	0.598444	0.746746	-0.0786945	-0.34131	0.421609	0.139388	0.875001	0.801461	0.074417	0.265173	P21995	P21995	Embigin
		20.0759	18.7019	19.1712	20.3056	20.3151	19.1034	18.783	19.874	19.2819	19.1163	19.0881	19.9378	19.7546	19.1023						1	1	1	NaN	NaN	NaN	NaN	NaN	NaN	21647000	6	0.629461	0.625493	0.474595	0.946965	-0.0345705	-0.0699233	0.432192	-0.356724	-0.85383	0.41258	0.401535	0.893389	0.871365	-0.0793813	-0.170415	P22315	P22315	Ferrochelatase, mitochondrial
		18.7953	19.8514	19.2714	19.6218	20.028	20.1508	20.2088	19.8328	19.2587	20.5712	17.6612	19.717	19.7321	19.5927						1	1	1	NaN	NaN	NaN	NaN	NaN	NaN	17145000	5	0.452399	0.140012	0.844684	0.330729	-0.295635	-1.07687	0.265244	-0.891405	-1.2541	1	0	0	0.0161606	0.374485	3.56314	P22366-2;P22366	P22366-2;P22366	Myeloid differentiation primary response protein MyD88
		25.498	25.4324	25.5313	25.5299	25.2757	25.4603	25.4436	26.0486	24.9803	24.4727	25.3657	24.9442	26.2078	25.663						8	8	8	45	45	45	NaN	0	NaN	1457100000	166	0.258326	0.16103	0.184928	0.741699	-0.107108	-0.348444	0.0902633	-0.617471	-2.09553	0.0506262	0.558331	2.56033	0.900765	-0.0479682	-0.131158	P22646	P22646	T-cell surface glycoprotein CD3 epsilon chain
		23.7087	23.4167	23.59	22.9978	23.8925	23.2873	23.6194	23.3233	22.8615	22.9737	23.1985	23.7099	22.4781	23.2847						9	9	9	NaN	NaN	NaN	NaN	0	NaN	351310000	64	0.0766026	0.554299	0.914589	0.478693	0.270762	0.765203	0.0390563	-0.519429	-2.77666	0.0936311	0.417109	2.06671	0.329707	0.373083	1.07939	P22682	P22682	E3 ubiquitin-protein ligase CBL
		35.1501	34.8636	34.9246	35.7751	35.5196	35.2382	34.6336	34.3719	35.1065	34.9655	35.498	35.2062	34.8902	36.0876						11	11	2	NaN	NaN	NaN	NaN	0	NaN	1152400000000	8053	0.388412	0.854683	0.4118	0.601226	-0.216313	-0.557493	0.497135	0.249177	0.731797	0.96835	-0.0116822	-0.041703	0.343229	-0.453807	-1.04657	Q8CGP6;Q8CGP7;Q8CGP5;Q8BFU2;P22752	Q8CGP6;Q8CGP7;Q8CGP5;Q8BFU2;P22752	Histone H2A type 1-H;Histone H2A type 1-K;Histone H2A type 1-F;Histone H2A type 3;Histone H2A type 1
		23.0381	23.2418	22.9343	22.8226	22.6948	22.8557	23.1472	24.0259	23.2544	23.5631	22.8741	22.7753	24.1131	23.0895						4	4	4	NaN	NaN	NaN	NaN	0	NaN	298580000	50	0.501746	0.604801	0.88759	0.41186	-0.316784	-0.89487	0.903392	0.0496281	0.127662	0.312881	-0.221325	-1.12188	0.777906	-0.145086	-0.297698	P22892	P22892	AP-1 complex subunit gamma-1
		26.1632	26.0632	25.8744	26.1751	25.9958	25.8693	26.2203	26.127	25.9529	26.1752	25.7794	25.9686	26.0179	26.1234						30	30	30	NaN	NaN	NaN	NaN	0	NaN	2151500000	370	0.484128	0.807418	0.614126	0.73573	0.0323866	0.356906	0.552502	-0.0839578	-0.636405	0.465164	0.0998336	0.790304	0.873312	0.0165108	0.167806	P23116	P23116	Eukaryotic translation initiation factor 3 subunit A
		28.1858	28.0499	28.5667	28.0477	28.3211	28.5643	27.6777	28.5168	28.56	28.0279	28.4187	28.084	28.5208	28.056						8	8	6	NaN	NaN	NaN	NaN	0	NaN	9757800000	553	0.831779	0.922635	0.618439	0.969391	-0.00773954	-0.0403296	0.821668	0.0655559	0.237535	0.559162	-0.123032	-0.625365	0.862374	0.049737	0.18248	P23198	P23198	Chromobox protein homolog 3
		19.6853	19.7568	20.0379	20.8941	19.8905	20.5298	20.4764	19.6767	19.8666	20.0554	20.5142	18.649	19.7606	19.1402						2	2	2	NaN	NaN	NaN	NaN	NaN	NaN	19862000	9	0.110686	0.165866	0.0797594	0.0848665	0.910252	2.14419	0.994758	0.00206105	0.00690415	0.892702	-0.0518824	-0.141896	0.0478554	0.960073	2.60678	P23249	P23249	Putative helicase MOV-10
		23.6977	23.9098	22.7454	23.81	23.6262	23.5031	23.3307	23.6776	23.3842	22.8292	23.702	23.6787	23.4229	23.6834						11	11	11	NaN	NaN	NaN	NaN	0	NaN	362510000	85	0.671105	0.555927	0.47614	0.874235	-0.0542855	-0.16657	0.3685	-0.229287	-0.988049	0.565216	0.235591	0.615405	0.624457	-0.0605888	-0.521236	P23475	P23475	X-ray repair cross-complementing protein 6
		24.9091	24.787	24.7187	25.0319	24.5016	24.4336	24.6938	24.7014	24.0953	23.6371	24.8127	24.8942	25.1354	24.4274						9	9	9	NaN	NaN	NaN	NaN	0	NaN	849710000	99	0.238645	0.531061	0.0269967	0.832991	0.0426772	0.222143	0.23534	-0.400882	-1.34856	0.0711514	0.679959	2.28433	0.271891	-0.236399	-1.23443	P23492	P23492	Purine nucleoside phosphorylase
		23.4392	23.7438	23.804	23.871	23.7231	23.5278	23.3431	24.009	23.3541	23.514	23.5859	23.8362	23.4447	23.9855						6	6	6	NaN	NaN	NaN	NaN	0	NaN	397260000	70	0.62794	0.534574	0.210779	0.824941	-0.0409961	-0.233079	0.393526	-0.166088	-0.933258	0.129056	0.22984	1.8161	0.647993	-0.104749	-0.485281	P23506;P23506-2	P23506;P23506-2	Protein-L-isoaspartate(D-aspartate) O-methyltransferase
		23.4112	24.0074	23.1334	23.0375	23.4691	23.0591	23.1251	23.4939	22.9001	22.956	23.3035	23.3624	23.1487	23.1702						7	7	7	NaN	NaN	NaN	NaN	0	NaN	317310000	72	0.228373	0.943325	0.38737	0.548035	0.170233	0.643856	0.229407	-0.233568	-1.36861	0.272211	0.344105	1.23349	0.698834	0.0596964	0.409923	P23591	P23591	GDP-L-fucose synthase
		23.3657	22.9021	23.2039	23.9886	23.1813	23.2017	23.7357	23.2072	23.7713	23.3404	23.4497	23.7729	24.0994	23.7959						8	8	8	NaN	NaN	NaN	NaN	0	NaN	368680000	76	0.0648635	0.433416	0.269074	0.125032	-0.524352	-1.84072	0.371963	0.188994	0.980289	0.617014	-0.155424	-0.532765	0.028052	-0.557921	-3.06156	P23780;Q8VC60	P23780	Beta-galactosidase
		25.4845	25.9403	25.4499	25.9954	25.3399	25.6403	25.948	25.6475	25.8269	25.8414	25.5148	25.256	26.5214	26.0294						19	19	19	NaN	NaN	NaN	NaN	0	NaN	1691900000	271	0.459516	0.813465	0.48951	0.563526	-0.218068	-0.618178	0.646449	0.0837682	0.487617	0.960133	-0.0101646	-0.0525393	0.431876	-0.291672	-0.854456	P24063	P24063	Integrin alpha-L
		25.9451	25.9652	26.1709	26.52	26.1389	26.3657	25.848	26.4587	26.1051	25.9273	26.0102	26.071	26.0761	25.9918						6	6	6	NaN	NaN	NaN	NaN	0	NaN	2239100000	204	0.233215	0.709349	0.931016	0.543077	0.103992	0.652174	0.308877	-0.188599	-1.13228	0.443375	0.136061	0.831889	0.379763	0.156531	0.963028	P24161;P24161-2	P24161;P24161-2	T-cell surface glycoprotein CD3 zeta chain
		27.2897	27.5628	27.8617	27.9514	27.1493	27.4806	27.3946	27.6026	27.7066	27.492	27.598	27.6206	27.8772	27.6534						13	13	13	NaN	NaN	NaN	NaN	0	NaN	6218800000	372	0.311483	0.406164	0.128012	0.800998	-0.0506304	-0.265809	0.184159	0.192067	1.54011	0.730645	0.0675559	0.364141	0.0654812	-0.310253	-2.35097	P24369	P24369	Peptidyl-prolyl cis-trans isomerase B
		24.2043	25.0062	25.1221	23.8001	24.2323	24.3008	24.4781	25.1073	24.7429	24.9913	24.8651	24.9583	25.7752	24.7613						7	7	7	NaN	NaN	NaN	NaN	0	NaN	931840000	120	0.0911639	0.634067	0.572971	0.225842	-0.631777	-1.3809	0.225099	0.336815	1.38349	0.422191	-0.333292	-0.873826	0.129961	-0.6353	-1.81066	P24452	P24452	Macrophage-capping protein
		28.6754	28.9241	28.9726	28.2516	28.639	28.6628	28.9342	29.1153	28.7122	28.6876	28.789	28.3799	28.3473	28.5568						25	25	25	NaN	NaN	NaN	NaN	0	NaN	13464000000	1039	0.145701	0.665895	0.106964	0.228244	0.277945	1.3726	0.466836	-0.108243	-0.787174	0.908942	-0.0236607	-0.120285	0.0373907	0.409848	2.81357	P24527	P24527	Leukotriene A-4 hydrolase
		24.1263	24.2995	24.0918	24.222	24.205	24.1996	24.6014	24.754	24.206	24.3705	24.2525	24.3199	24.4394	24.5188						8	8	7	NaN	NaN	NaN	NaN	0	NaN	642140000	70	0.687017	0.0463847	0.584906	0.0222427	-0.24112	-3.26821	0.383669	-0.163678	-0.954491	0.243455	-0.0914036	-1.32187	0.93895	0.0139615	0.0805158	P24547	P24547	Inosine-5-monophosphate dehydrogenase 2
		24.8001	24.6422	25.3417	25.1511	24.8045	25.1684	25.3673	24.9271	25.6634	25.4578	25.3263	24.9408	25.4181	25.1367						7	7	7	NaN	NaN	NaN	NaN	0	NaN	1137200000	123	0.0582034	0.536273	0.18217	0.45053	-0.181448	-0.818069	0.0579324	0.415652	2.45006	0.0601829	-0.498729	-2.41912	0.623774	-0.0983715	-0.522291	P24668	P24668	Cation-dependent mannose-6-phosphate receptor
		22.0977	20.9329	22.0044	22.5707	21.9288	22.0012	22.1813	22.5132	22.4789	20.7623	23.0445	22.2863	22.4733	21.897						5	5	5	NaN	NaN	NaN	NaN	0	NaN	157140000	18	0.734476	0.597376	0.862123	0.496497	-0.317453	-0.732937	0.922365	-0.060914	-0.102471	0.794391	-0.193804	-0.274899	0.776769	-0.0627356	-0.299277	P24788;P24788-2	P24788;P24788-2	Cyclin-dependent kinase 11B
		25.3664	25.3455	25.0774	25.2345	25.2287	25.1963	25.3788	25.4498	25.1641	25.11	24.9331	25.543	25.463	25.2459						20	20	20	34	34	34	NaN	0	NaN	1230000000	218	0.571911	0.0268859	0.0677179	0.195127	-0.161352	-1.4951	0.0455041	-0.244318	-2.64858	0.113867	0.186872	1.91354	0.359572	-0.103907	-1.00833	P25206	P25206	DNA replication licensing factor MCM3
		28.1064	28.0792	27.885	28.0123	27.834	27.816	27.8453	28.0939	28.0968	28.0493	27.7286	27.8982	28.3192	27.9142						10	10	10	NaN	NaN	NaN	NaN	0	NaN	7795400000	309	0.649056	0.710824	0.27051	0.864944	-0.023132	-0.179029	0.644412	0.0609337	0.490703	0.604127	0.0624812	0.552921	0.340279	-0.146547	-1.05364	P25444	P25444	40S ribosomal protein S2
		29.1396	29.0394	28.7675	28.7914	29.0695	28.6575	29.0801	29.2477	28.907	28.93	28.8687	28.7741	28.9379	28.837						86	86	79	NaN	NaN	NaN	NaN	0	NaN	15240000000	2117	0.32258	0.811565	0.50258	0.497025	0.0848168	0.731994	0.487533	-0.111827	-0.749078	0.778458	0.0326044	0.296932	0.334941	0.164039	1.06656	P26039	P26039	Talin-1
		27.0937	26.8809	27.1176	26.5948	26.8827	27.0124	26.7297	27.4078	26.8788	26.487	26.8547	26.683	26.7349	26.6596						27	16	16	NaN	NaN	NaN	NaN	0	NaN	3656100000	250	0.07317	0.818416	0.601118	0.174028	0.229223	1.58408	0.241725	-0.268016	-1.32749	0.355585	0.181571	1.01753	0.12729	0.315668	1.8268	P26040	P26040	Ezrin
		30.9118	30.8164	31.032	30.5036	30.8471	30.758	30.7868	31.1881	30.7274	30.47	30.7428	30.3658	30.2985	30.5026						45	45	33	65	65	NaN	NaN	0	NaN	55307000000	1909	0.00691517	0.52306	0.121953	0.0305161	0.426981	2.98804	0.134089	-0.248289	-1.78638	0.318773	0.169212	1.10678	0.0107853	0.506058	3.95605	P26041	P26041	Moesin
		25.5394	25.6503	25.393	25.0915	25.4976	25.4129	25.2584	24.9171	25.5714	25.4731	25.1496	24.9975	24.8227	25.1731						21	9	9	NaN	NaN	NaN	NaN	0	NaN	1015700000	88	0.264705	0.0648718	0.333253	0.0525892	0.420779	2.52908	0.525058	0.126527	0.682836	0.912946	0.0205285	0.114966	0.175648	0.273723	1.57688	P26043	P26043	Radixin
		21.6997	21.6217	22.3028	21.9886	22.5302	21.7704	20.9089	21.9728	21.8297	21.5856	21.5264	22.185	22.2799	22.3604						5	5	5	NaN	NaN	NaN	NaN	0	NaN	132660000	28	0.62781	0.370119	0.130918	0.104866	-0.371907	-1.97785	0.729462	-0.148352	-0.365827	0.254634	0.255963	1.28644	0.284612	-0.479518	-1.19797	P26323	P26323	Friend leukemia integration 1 transcription factor
		26.7135	26.4725	26.3764	26.5407	26.7788	26.7297	26.4824	27.1507	26.0587	26.1848	26.3422	26.8021	26.8002	26.5726						11	11	11	NaN	NaN	NaN	NaN	0	NaN	3158400000	303	0.087053	0.00424608	0.219447	0.117723	-0.199168	-1.8876	0.0207107	-0.590192	-3.333	0.0285593	0.33054	3.04585	0.744037	0.0604846	0.345136	P26369	P26369	Splicing factor U2AF 65 kDa subunit
		28.1586	27.9321	27.9832	28.4475	28.1045	27.8327	28.2248	28.4151	28.0494	28.1765	28.1656	28.1473	28.6158	28.3304						21	21	21	NaN	NaN	NaN	NaN	0	NaN	9053400000	799	0.365048	0.368322	0.365755	0.247116	-0.234164	-1.31011	0.929399	-0.013811	-0.0931534	0.999093	-0.000169436	-0.00119527	0.28494	-0.220183	-1.19705	P26443	P26443	Glutamate dehydrogenase 1, mitochondrial
		23.9048	23.4952	23.8995	23.8377	23.968	23.9042	23.6616	23.8911	23.5976	23.3986	23.4434	23.9561	23.3893	23.7338						8	8	8	NaN	NaN	NaN	NaN	0	NaN	437330000	96	0.0439575	0.216674	0.502234	0.633485	0.0912577	0.507355	0.0102808	-0.37631	-4.00417	0.0603723	0.304416	2.41657	0.352204	0.163152	1.02539	P26450;Q64143;O08908	P26450	Phosphatidylinositol 3-kinase regulatory subunit alpha
		23.8374	23.8968	24.0936	24.645	24.1189	23.9191	24.3671	23.2644	23.3332	22.7851	23.7615	24.4275	23.6381	24.3561						4	4	4	NaN	NaN	NaN	NaN	0	NaN	558210000	57	0.234102	0.31579	0.0519448	0.944115	-0.0223324	-0.0736887	0.148898	-0.624083	-1.70508	0.0502088	0.824927	2.56715	0.551838	-0.223177	-0.637509	P26516	P26516	26S proteasome non-ATPase regulatory subunit 7
		26.2712	26.0173	26.2479	25.7315	25.9195	26.0385	26.4724	26.4399	26.4084	26.0593	26.0712	25.9577	26.2466	26.0622						11	11	11	NaN	NaN	NaN	NaN	0	NaN	2313600000	177	0.950432	0.713617	0.361299	0.899474	-0.0218735	-0.132876	0.85054	-0.0379621	-0.19841	0.551993	-0.112686	-0.63725	0.506595	0.128774	0.715001	P26638	P26638	Serine--tRNA ligase, cytoplasmic
		24.9876	25.3634	26.4174	24.6804	25.5149	25.9795	25.9964	26.7301	25.8393	26.086	26.1449	25.7384	26.1615	25.5714						5	5	5	NaN	NaN	NaN	NaN	0	NaN	1966600000	120	0.462593	0.290882	0.143672	0.372363	-0.461579	-0.979397	0.921519	-0.0318302	-0.103594	0.205564	-0.661204	-1.45448	0.516123	0.231456	0.698303	P26883	P26883	Peptidyl-prolyl cis-trans isomerase FKBP1A
		19.9773	20.3591	19.7933	20.3364	18.4031	19.7734	20.5079	19.5369	19.5379	20.0615	19.9006	19.8586	20.3148	19.9271						3	3	3	3	3	3	NaN	NaN	NaN	27229000	19	0.739031	0.424027	0.210796	0.699252	0.0829566	0.409316	0.62367	0.278004	0.522451	0.23374	0.283165	1.35392	0.407941	-0.478213	-0.90296	P27046	P27046	Alpha-mannosidase 2
		26.5412	26.729	26.1616	26.469	26.3597	26.2958	25.9808	26.065	26.6195	26.1743	26.2963	25.9876	26.5049	26.2746						5	5	5	NaN	NaN	NaN	NaN	0	NaN	2500300000	236	0.899566	0.100529	0.447222	0.294609	0.219498	1.17033	0.277571	0.18805	1.21797	0.55843	0.111818	0.626574	0.646444	-0.0803707	-0.487624	P27048;P63163	P27048;P63163	Small nuclear ribonucleoprotein-associated protein B;Small nuclear ribonucleoprotein-associated protein N
		24.2857	24.3839	24.6609	24.0067	24.6424	24.5008	24.5099	24.4865	24.5607	24.5699	24.4521	24.2402	24.0684	24.5117						14	14	14	19	19	19	NaN	0	NaN	711250000	115	0.74047	0.955103	0.0463304	0.765162	0.0608309	0.315448	0.896242	-0.00730085	-0.137179	0.288661	-0.193294	-1.18667	0.0741791	0.261426	2.25105	P27546-2;P27546;P27546-3;P27546-4	P27546-2;P27546;P27546-3	Microtubule-associated protein 4
		21.2769	21.5132	21.701	20.7494	20.9189	21.6449	21.0425	18.5627	21.1936	19.2389	21.5341	20.9269	19.3907	18.3812						2	2	2	NaN	NaN	NaN	NaN	0	NaN	61813000	11	0.204878	0.158969	0.794657	0.0470798	1.74386	2.62032	0.914314	0.113303	0.113151	0.357473	0.654575	1.01316	0.380002	0.975979	0.962504	P27577	P27577	Protein C-ets-1
		22.2502	22.2246	22.3791	21.7914	21.6633	21.65	21.6348	22.1798	21.7101	21.8057	21.4101	21.6388	23.1112	21.9049						3	3	3	NaN	NaN	NaN	NaN	0	NaN	134770000	21	0.856804	0.894321	0.0589332	0.894398	-0.0569841	-0.139637	0.485556	-0.140028	-0.752666	0.0351498	0.519369	2.86622	0.336184	-0.436325	-1.06353	P27601	P27601	Guanine nucleotide-binding protein subunit alpha-13
		24.41	24.7769	24.4925	24.2277	24.5914	24.3817	24.7067	24.8661	24.6357	24.5729	24.5107	24.6523	24.7208	24.1688						16	16	16	NaN	NaN	NaN	NaN	0	NaN	722030000	146	0.913498	0.582174	0.372123	0.858628	-0.0372294	-0.187517	0.632112	-0.0633251	-0.509459	0.517745	-0.0963858	-0.695481	0.545207	0.122482	0.648595	P27612	P27612	Phospholipase A-2-activating protein
		23.6143	23.8482	23.8846	23.635	24.1582	24.0316	23.9735	23.959	24.1462	23.9986	24.0448	23.5581	24.0225	23.6079						7	7	7	NaN	NaN	NaN	NaN	0	NaN	510320000	149	0.920582	0.809234	0.00340038	0.918417	0.0160084	0.107707	0.636749	0.0325898	0.502364	0.0173522	-0.317643	-3.49634	0.0751056	0.301062	2.24116	P27641	P27641	X-ray repair cross-complementing protein 5
		27.1909	27.2354	27.071	27.1724	27.3443	27.11	27.3327	27.0024	27.3654	26.9854	26.8905	27.1255	27.1981	26.9384						15	15	15	NaN	NaN	NaN	NaN	0	NaN	4546400000	317	0.286365	0.82155	0.898015	0.344079	0.0800921	1.04455	0.490571	-0.116893	-0.743584	0.527382	0.0869954	0.678841	0.39787	0.109989	0.924037	P27659	P27659	60S ribosomal protein L3
		23.7663	24.6068	23.8436	25.0042	24.709	23.4665	22.8875	21.2142	25.8225	23.3958	24.9776	22.913	20.032	23.0905						10	5	4	51	NaN	NaN	NaN	0	NaN	496210000	18	0.657495	0.0208216	0.307548	0.0517826	2.29341	2.54176	0.172382	1.66266	1.59146	0.565045	-0.426743	-0.615684	0.416286	1.05749	0.885804	P27661	P27661	Histone H2AX
		29.6308	29.9051	30.1581	30.1409	29.6669	30.1244	30.1576	30.1065	30.2054	30.2199	30.1334	29.8964	30.3471	30.1176						33	33	33	NaN	NaN	NaN	NaN	0	NaN	33618000000	1576	0.176064	0.977713	0.609442	0.415987	-0.161605	-0.886413	0.270597	0.172384	1.23822	0.184746	-0.227481	-1.53764	0.570022	-0.106509	-0.607545	P27773	P27773	Protein disulfide-isomerase A3
		23.784	23.4551	23.688	23.0847	23.5879	23.8877	23.4564	23.4919	23.4404	23.6482	23.3204	22.8944	22.9579	23.7657						5	4	4	NaN	NaN	NaN	NaN	0	NaN	375080000	11	0.218317	0.747035	0.292154	0.3651	0.296951	0.995725	0.377685	-0.136308	-0.967598	0.874953	0.0332465	0.165609	0.186914	0.400012	1.52857	P27782;P27782-2	P27782;P27782-2	Lymphoid enhancer-binding factor 1
		24.2875	24.4549	24.0474	23.9934	24.3255	24.195	24.721	23.9595	24.3384	24.2833	24.1903	24.2728	23.6239	24.3563						11	11	11	15	15	15	NaN	0	NaN	585750000	103	0.649283	0.894796	0.356565	0.650627	0.111496	0.481302	0.883698	-0.0295547	-0.153913	0.595441	-0.0748879	-0.566651	0.460628	0.215939	0.798839	P27870	P27870	Proto-oncogene vav
		26.2942	26.3778	26.5494	26.2237	26.4503	26.5747	26.6687	27.0358	26.8265	26.6954	26.6363	26.3708	26.2869	26.4026						6	6	6	21	21	21	NaN	0	NaN	3045000000	185	0.874208	0.770252	0.00331359	0.932066	0.00787735	0.0896232	0.822266	0.0370078	0.23672	0.0132495	-0.358107	-3.75323	0.082532	0.328976	2.16626	P28063	P28063	Proteasome subunit beta type-8
		21.9823	22.2514	22.1815	22.2089	22.3466	22.0049	22.6842	22.5946	20.5017	21.2054	22.06	22.3634	21.3403	21.9805						6	6	6	NaN	NaN	NaN	NaN	0	NaN	135580000	42	0.0165532	0.116874	0.448915	0.360136	0.261292	1.00704	0.0399342	-1.15187	-2.7579	0.065746	0.900337	2.34772	0.156494	0.512829	1.66649	P28271;Q811J3	P28271	Cytoplasmic aconitate hydratase
		27.1454	27.1538	26.9722	26.8186	27.1959	27.1313	26.9442	27.8888	26.9154	27.1261	27.0818	26.6424	27.1081	26.8599						13	13	13	NaN	NaN	NaN	NaN	0	NaN	4225100000	399	0.196761	0.591507	0.161703	0.34722	0.152384	1.0371	0.365484	-0.248968	-0.994854	0.870874	-0.0185839	-0.171073	0.179391	0.419937	1.5605	P28352	P28352	DNA-(apurinic or apyrimidinic site) lyase;DNA-(apurinic or apyrimidinic site) lyase, mitochondrial
		26.9427	26.9859	27.1042	26.5311	27.042	26.7214	27.1661	27.2766	26.5594	26.7104	26.8508	26.5904	26.4453	26.8126						14	14	14	NaN	NaN	NaN	NaN	0	NaN	3688400000	394	0.0245409	0.658243	0.30855	0.171964	0.274882	1.59334	0.081666	-0.344673	-2.17461	0.311274	0.184108	1.12604	0.0485277	0.435446	2.59525	P28474;Q64437	P28474	Alcohol dehydrogenase class-3
		22.1878	22.2146	22.6003	19.5756	22.4941	22.0509	22.1083	22.1996	22.4143	22.5112	22.33	22.2562	22.2057	19.128						2	2	2	NaN	NaN	NaN	NaN	0	NaN	140260000	18	0.843956	0.745075	0.166909	0.723093	0.447932	0.374926	0.16018	0.205274	1.64843	0.391133	-0.773942	-0.938375	0.2969	1.0166	1.16411	P28574	P28574	Protein max
		23.9351	23.6398	23.3951	23.8606	23.692	23.5674	23.368	23.8865	23.5031	23.2849	23.0776	23.9821	23.9025	23.6271						5	4	4	NaN	NaN	NaN	NaN	0	NaN	391060000	74	0.394767	0.135744	0.0241364	0.479472	-0.129609	-0.763773	0.0940749	-0.339947	-2.06299	0.0639456	0.419085	2.37009	0.241371	-0.208747	-1.32865	P28656	P28656	Nucleosome assembly protein 1-like 1
		20.1346	20.676	20.0937	21.1778	20.1576	20.3832	20.3754	20.4329	20.4812	20.3099	20.4632	18.8332	20.2906	18.7083						2	2	2	NaN	NaN	NaN	NaN	0	NaN	28650000	13	0.0526594	0.046742	0.100363	0.0630303	1.24314	2.38172	0.388118	0.0808282	0.944854	0.751778	0.102425	0.334218	0.0573223	1.05989	2.45867	P28658	P28658	Ataxin-10
		21.0915	21.1737	20.1987	20.6998	20.9004	20.6073	21.2732	21.1564	20.9449	20.6101	21.0533	19.3857	17.0235	20.057						2	2	2	NaN	NaN	NaN	NaN	NaN	NaN	52610000	19	0.0324438	0.0947002	0.0235421	0.0601179	1.96887	2.41999	0.603599	-0.1149	-0.553752	0.794912	-0.0785023	-0.274182	0.0408175	2.16227	2.73948	P28740-2;P28740;P28740-1	P28740-2;P28740;P28740-1	Kinesin-like protein KIF2A
		22.9087	23.4924	22.5063	22.6829	22.8632	22.8564	22.2012	23.2503	20.8757	21.1517	23.2244	22.5733	23.8016	23.6168						8	8	8	13	13	13	NaN	0	13	214240000	32	0.456226	0.143607	0.0576886	0.337683	-0.433001	-1.0599	0.181335	-1.0422	-1.55213	0.147665	1.147	1.71154	0.247298	-0.537793	-1.30953	P28843	P28843	Dipeptidyl peptidase 4;Dipeptidyl peptidase 4 membrane form;Dipeptidyl peptidase 4 soluble form
		20.3433	19.8631	20.4876	20.4016	20.2186	20.3076	21.496	20.3331	20.711	20.4182	20.2393	20.3877	21.0312	20.3094						2	1	1	NaN	NaN	NaN	NaN	NaN	NaN	35399000	4	0.716655	0.327442	0.676695	0.286074	-0.302199	-1.19388	0.739239	-0.132661	-0.351927	0.407699	-0.182268	-0.903461	0.976245	0.0127301	0.0312952	P28867;P28867-2	P28867;P28867-2	Protein kinase C delta type;Protein kinase C delta type regulatory subunit;Protein kinase C delta type catalytic subunit
		18.8789	18.584	20.7008	18.9756	18.3594	17.8487	17.948	18.1986	21.7534	20.4444	18.9585	18.9185	18.2036	18.4847						1	1	1	NaN	NaN	NaN	NaN	NaN	NaN	5179000	2	0.119669	0.00828659	0.488753	0.262251	0.749234	1.2631	0.0207445	2.29674	3.33152	0.26733	-1.10059	-1.24788	0.100157	-0.446919	-2.01382	P29037	P29037	TATA-box-binding protein
		26.8901	26.8729	26.8014	26.879	26.8428	26.8805	27.0902	27.1358	26.955	26.5764	26.8363	26.9182	26.9959	26.838						20	20	20	NaN	NaN	NaN	NaN	0	NaN	3749800000	346	0.320582	0.0870012	0.990672	0.264329	-0.0565198	-1.25684	0.181767	-0.198086	-1.55028	0.491574	0.0715949	0.741776	0.494665	0.0699712	0.73622	P29341	P29341	Polyadenylate-binding protein 1
		27.1399	26.9859	27.0425	27.0066	27.0955	26.8292	27.0053	27.4071	27.0132	27.1731	26.9544	27.0462	27.3947	27.0502						24	24	24	NaN	NaN	NaN	NaN	0	NaN	4273900000	601	0.665737	0.443844	0.689824	0.303793	-0.119988	-1.14566	0.81704	-0.0373702	-0.243846	0.964567	-0.0031743	-0.0466912	0.664864	-0.0794435	-0.459944	P29351;P29351-2;P29351-3	P29351;P29351-2;P29351-3	Tyrosine-protein phosphatase non-receptor type 6
		25.6463	26.2692	26.2891	25.6585	25.7323	25.5601	25.8007	26.1456	26.224	26.3243	25.9801	26.1004	26.2479	25.7899						8	8	8	NaN	NaN	NaN	NaN	0	NaN	1930900000	208	0.161015	0.344361	0.931429	0.753655	-0.0802794	-0.331578	0.0819124	0.366426	2.17223	0.403528	-0.210334	-0.912145	0.255492	-0.236372	-1.28377	P29391;P49945	P29391;P49945	Ferritin light chain 1;Ferritin light chain 2
		24.2466	24.1216	23.8245	24.4973	23.6	22.9118	23.8793	23.7836	23.386	23.8579	23.7886	23.9278	24.0893	24.1588						9	9	9	NaN	NaN	NaN	NaN	0	NaN	455130000	69	0.953966	0.265219	0.0131234	0.543961	0.113921	0.650687	0.659923	0.133783	0.467329	0.0615651	0.49505	2.40073	0.109361	-0.514913	-1.94505	P29416	P29416	Beta-hexosaminidase subunit alpha
		23.0897	19.6614	23.4216	23.2604	23.3378	23.6942	23.9532	18.3957	18.2115	19.1858	23.8038	22.6235	19.0809	23.1509						2	2	2	NaN	NaN	NaN	NaN	0	NaN	248950000	13	0.32789	0.698719	0.647277	0.644943	0.739873	0.489898	0.402808	-1.94487	-0.91365	0.325012	1.95792	1.09106	0.717112	0.726824	0.383503	P29595	P29595	NEDD8
		24.2062	23.9848	24.0189	24.4342	24.1594	23.6657	24.6251	25.1675	24.7136	24.7779	24.0622	24.9175	25.3864	24.3543						8	8	8	NaN	NaN	NaN	NaN	0	NaN	672420000	92	0.129865	0.26501	0.81096	0.0477362	-0.725034	-2.60885	0.800279	0.113467	0.266797	0.176651	-0.356863	-1.57246	0.337799	-0.481638	-1.05962	P29758	P29758	Ornithine aminotransferase, mitochondrial
		25.166	25.4958	25.4712	25.0948	25.2963	25.2126	25.4287	25.928	25.7014	25.7385	25.384	25.1268	25.5502	25.3217						11	11	11	31	31	31	NaN	0	NaN	1365800000	182	0.541233	0.842267	0.131839	0.876944	-0.0259474	-0.162944	0.533128	0.141557	0.669017	0.108112	-0.301029	-1.95402	0.562471	0.133525	0.619912	P30416	P30416	Peptidyl-prolyl cis-trans isomerase FKBP4;Peptidyl-prolyl cis-trans isomerase FKBP4, N-terminally processed
		29.2321	29.3377	29.6712	29.0494	29.5218	29.6966	29.3779	29.9517	29.8236	29.5745	29.4793	29.2501	30.0062	29.4233						13	11	11	49	39	39	NaN	0	NaN	24220000000	711	0.466611	0.329749	0.231683	0.378949	-0.237284	-0.964815	0.949709	-0.0112363	-0.0662989	0.146957	-0.30319	-1.71526	0.76161	0.0771429	0.320417	P30681	P30681	High mobility group protein B2
		24.4472	24.5414	24.392	24.4753	24.7814	24.3265	24.502	24.5955	24.2447	24.3631	24.1191	24.6591	24.5568	24.4605						9	9	9	50	50	50	NaN	0	NaN	706280000	139	0.15793	0.0234453	0.133708	0.177484	-0.094814	-1.56881	0.0587137	-0.309095	-2.43917	0.0242073	0.221711	3.19213	0.953803	-0.00742976	-0.0608937	P31230	P31230	Aminoacyl tRNA synthase complex-interacting multifunctional protein 1;Endothelial monocyte-activating polypeptide 2
		23.975	24.904	25.362	24.1801	24.4705	24.8817	24.4277	25.507	25.0534	24.5677	24.7534	24.9906	24.8693	24.9763						3	3	3	NaN	NaN	NaN	10	0	NaN	884540000	59	0.547198	0.458808	0.902421	0.413661	-0.340138	-0.891172	0.928138	-0.0302423	-0.0948237	0.659803	-0.186222	-0.467509	0.695217	-0.123674	-0.415191	P31786	P31786	Acyl-CoA-binding protein
		22.1383	22.464	22.3149	21.6746	22.4944	22.1472	22.5048	22.7382	22.5868	22.0088	22.4717	22.6197	22.7845	22.416						5	5	4	NaN	NaN	NaN	NaN	0	NaN	177020000	15	0.283003	0.0795741	0.816256	0.0929519	-0.458801	-2.07243	0.600144	-0.115404	-0.559202	0.445076	-0.207801	-0.828587	0.459844	-0.135596	-0.800322	P31938	P31938	Dual specificity mitogen-activated protein kinase kinase 1
		24.4836	24.3386	25.1866	24.7962	24.5808	25.1447	25.053	25.2531	25.0223	24.5409	25.193	24.7982	25.4072	24.8214						6	6	6	NaN	NaN	NaN	NaN	0	NaN	984660000	72	0.5646	0.265994	0.568384	0.318464	-0.307728	-1.10757	0.724995	-0.0891738	-0.372204	0.466176	-0.217476	-0.788409	0.996614	-0.00107876	-0.00445985	P32020-2;P32020	P32020-2;P32020	Non-specific lipid-transfer protein
		27.3581	27.113	27.3174	27.3544	27.2582	27.5076	27.4088	27.4318	27.6467	27.5196	27.3213	27.3188	27.538	27.3406						20	20	20	47	47	47	NaN	0	NaN	5285100000	432	0.155303	0.718906	0.146732	0.264779	-0.113429	-1.25549	0.391244	0.094278	0.938137	0.101868	-0.210156	-2.00055	0.978128	0.00244935	0.0288132	P32067	P32067	Lupus La protein homolog
		21.8609	20.6665	22.0071	22.1209	21.3686	22.2574	21.3983	21.9653	22.2172	22.1087	22.1453	22.1631	22.0607	21.7458						5	5	5	21	21	21	NaN	0	NaN	116570000	36	0.161913	0.922949	0.617962	0.464621	-0.326015	-0.791323	0.175805	0.409651	1.57619	0.271613	-0.493187	-1.23525	0.424621	-0.24248	-0.868933	P32233	P32233	Developmentally-regulated GTP-binding protein 1
		22.8344	22.6026	22.4956	22.4096	22.3175	22.3935	22.5228	23.2172	22.4155	22.3076	21.9425	22.296	23.4978	22.5181						5	5	1	NaN	NaN	NaN	NaN	0	NaN	186570000	24	0.638944	0.261058	0.248199	0.596277	-0.18511	-0.565325	0.209437	-0.390891	-1.43991	0.0744013	0.363674	2.24867	0.70473	-0.157893	-0.401365	P32883-2;P32883;Q61411-2	P32883-2;P32883;Q61411-2	GTPase KRas;GTPase KRas, N-terminally processed
		24.0806	24.2099	23.8147	23.8036	23.9527	23.8185	23.8662	23.9252	23.8873	23.3689	23.7874	24.0756	23.8978	23.8376						9	9	9	NaN	NaN	NaN	NaN	0	NaN	485100000	135	0.221452	0.539618	0.104026	0.774926	0.0401975	0.301839	0.188287	-0.209444	-1.52288	0.157899	0.295993	1.65956	0.534725	-0.0463518	-0.666301	P32921-2;P32921	P32921-2;P32921	Tryptophan--tRNA ligase, cytoplasmic;T1-TrpRS;T2-TrpRS
		25.1809	25.1923	25.7864	25.1996	26.1003	25.8663	25.3779	26.3671	25.5962	25.5728	25.7234	25.8047	26.1488	25.1559						5	5	5	NaN	NaN	NaN	NaN	0	NaN	1660400000	131	0.869185	0.0876998	0.217525	0.280823	-0.363319	-1.20868	0.290579	-0.297095	-1.18137	0.167838	-0.291005	-1.61219	0.546665	0.22478	0.646149	P34022	P34022	Ran-specific GTPase-activating protein
		26.2972	26.7121	26.9563	26.0189	26.693	26.9969	27.1788	27.4387	26.7665	26.8067	27.0779	26.5044	26.5541	26.9265						4	4	4	NaN	NaN	NaN	NaN	0	NaN	3723700000	134	0.936629	0.188551	0.0393727	0.568829	-0.16552	-0.609492	0.384543	-0.193152	-0.952591	0.197433	-0.387558	-1.48595	0.11316	0.41519	1.91841	P34884	P34884	Macrophage migration inhibitory factor
		21.2435	22.2478	22.1898	20.2831	22.2179	21.9359	22.3366	22.3669	21.8061	22.2137	22.2553	21.9667	22.4291	21.7316						4	4	4	NaN	NaN	NaN	NaN	0	NaN	138440000	51	0.490253	0.215042	0.225988	0.381559	-0.55141	-0.959093	0.495678	-0.12263	-0.734404	0.333831	-0.600628	-1.06926	0.444479	0.171848	0.829745	P35235;P35235-2	P35235;P35235-2	Tyrosine-protein phosphatase non-receptor type 11
		25.9412	25.8764	25.6429	26.2686	25.9615	25.8874	25.8929	25.6998	25.7747	25.9495	25.9415	26.1433	26.6197	26.2039						8	8	6	NaN	NaN	NaN	NaN	0	NaN	1981400000	307	0.0789635	0.201096	0.0396552	0.105364	-0.390061	-1.97415	0.744285	0.0281916	0.344786	0.795896	0.0436678	0.272827	0.0225065	-0.461921	-3.25756	P35278	P35278	Ras-related protein Rab-5C
		21.1592	21.3821	19.8767	21.2223	19.9431	19.9072	18.0699	19.1872	18.8052	20.0443	19.6052	20.8872	19.2286	19.4229						9	1	1	49	NaN	NaN	NaN	0	NaN	23389000	5	0.337673	0.0938868	0.040845	0.136849	1.06385	1.77056	0.743236	0.208089	0.346269	0.0385362	1.42515	2.78799	0.439866	-0.569386	-0.838727	P35279;Q8BHD0	P35279	Ras-related protein Rab-6A
		26.0475	25.9543	25.4502	26.432	25.4527	25.8542	25.6783	25.857	25.9704	25.8774	25.7828	25.712	26.4029	25.8201						9	9	1	49	49	NaN	NaN	0	NaN	1979200000	166	0.602438	0.5245	0.288487	0.981428	-0.00731468	-0.024465	0.230354	0.166334	1.36538	0.714794	0.0941334	0.386835	0.262585	-0.267782	-1.26209	P35279-2	P35279-2	Ras-related protein Rab-6A
		23.3663	23.8066	23.0472	23.2156	23.324	22.9337	23.0053	23.3814	22.5647	23.1589	23.416	23.2815	23.4057	23.2255						5	5	5	NaN	NaN	NaN	NaN	0	NaN	287390000	86	0.606378	0.987288	0.182711	0.79333	0.0546528	0.276361	0.664975	-0.114582	-0.459779	0.324035	0.312373	1.0935	0.353608	-0.143138	-1.02212	P35282	P35282	Ras-related protein Rab-21
		23.7065	23.6888	23.49	24.0095	23.7288	23.5739	23.8963	23.7948	23.3479	23.6452	23.9307	23.9696	24.2186	24.0245						7	7	7	NaN	NaN	NaN	NaN	0	NaN	447890000	113	0.290842	0.0921635	0.0892644	0.0579104	-0.347179	-2.45036	0.537086	-0.107236	-0.662292	0.681527	0.0824633	0.435251	0.0250362	-0.322406	-3.16209	P35293	P35293	Ras-related protein Rab-18
		23.9193	21.6191	22.103	24.0903	23.7622	22.5297	23.1871	23.9441	23.1781	20.561	23.0443	23.3944	22.9442	23.6378						8	8	8	NaN	NaN	NaN	NaN	0	NaN	304340000	58	0.540853	0.232348	0.575772	0.628357	-0.392522	-0.515226	0.232427	-1.09466	-1.35834	0.542576	0.6718	0.653017	0.944443	0.0303365	0.0732561	P35441;CON__Q28194	P35441	Thrombospondin-1
		25.5574	24.8006	25.2487	25.5048	25.2152	25.0187	25.3197	25.2622	25.4956	25.3349	25.6241	25.3851	25.0224	25.2484						11	11	11	NaN	NaN	NaN	NaN	0	NaN	1195900000	119	0.388689	0.227923	0.452504	0.800849	0.0592551	0.266014	0.0431128	0.2809	2.6936	0.382169	-0.206954	-0.957762	0.905355	-0.0146918	-0.125052	P35486	P35486	Pyruvate dehydrogenase E1 component subunit alpha, somatic form, mitochondrial
		28.6236	28.6728	28.3842	28.9104	28.5414	28.6519	28.2673	28.2136	28.0928	28.1763	28.6154	28.4686	28.5829	28.6372						16	16	14	NaN	NaN	NaN	NaN	0	NaN	11312000000	639	0.382253	0.889639	0.0543662	0.555066	0.0848645	0.632143	0.532343	-0.123751	-0.670356	0.116596	0.352958	1.89509	0.323891	-0.144343	-1.09386	P35550	P35550	rRNA 2-O-methyltransferase fibrillarin
		27.4731	27.3949	27.8657	28.2129	27.2399	28.0541	27.6502	27.6468	28.1923	28.3386	28.2978	28.0037	28.7323	28.1126						22	22	22	NaN	NaN	NaN	NaN	0	NaN	7778500000	628	0.00791946	0.790465	0.793503	0.121883	-0.546191	-1.86056	0.0255925	0.6285	3.14256	0.0632837	-0.539594	-2.37848	0.0677536	-0.635096	-2.32355	P35564	P35564	Calnexin
		24.2696	24.4517	24.0488	24.1507	24.0885	23.8288	24.2825	24.591	24.39	24.0336	24.1662	24.2084	24.2252	24.1012						9	9	7	NaN	NaN	21	NaN	0	NaN	583240000	101	0.825929	0.824881	0.953338	0.648996	0.0519552	0.483764	0.995939	-0.00111866	-0.00534952	0.812536	0.0335894	0.249997	0.923469	0.0194845	0.101008	P35585;Q9WVP1-2	P35585	AP-1 complex subunit mu-1
		29.2958	29.5829	29.5913	29.0926	29.2301	29.5089	29.7787	29.4853	29.721	29.5379	29.2596	29.2641	29.3773	29.2327						14	14	13	NaN	NaN	NaN	NaN	0	NaN	21941000000	613	0.68917	0.801389	0.184489	0.53087	0.0992835	0.672869	0.976343	0.00541496	0.0311665	0.552862	-0.115525	-0.635805	0.188655	0.209394	1.52136	P35700	P35700	Peroxiredoxin-1
		23.6697	23.3965	23.1245	23.5918	23.1291	23.3746	23.4978	23.362	23.1374	23.2978	23.3546	23.5755	23.8969	23.5074						6	6	6	NaN	NaN	NaN	NaN	0	NaN	330050000	48	0.519867	0.30309	0.034473	0.276213	-0.214297	-1.22188	0.497353	-0.0775846	-0.731407	0.288742	0.182353	1.18645	0.0653246	-0.319066	-2.3529	P35821	P35821	Tyrosine-protein phosphatase non-receptor type 1
		19.099	19.4582	19.1189	19.0338	19.4507	19.5622	18.8793	19.7913	19.3235	19.9944	19.6181	19.051	19.1348	20.1576						2	2	2	NaN	NaN	NaN	NaN	0	NaN	19151000	17	0.271018	0.800824	0.323567	0.434418	-0.270343	-0.849429	0.460936	0.224439	0.798258	0.0642692	-0.467866	-2.36602	0.945682	-0.0269159	-0.071619	P35922-9;P35922-8;P35922-3;P35922-7;P35922-2;P35922;P35922-11;P35922-10;P35922-5;P35922-4;P35922-12;P35922-6	P35922-9;P35922-8;P35922-3;P35922-7;P35922-2;P35922;P35922-11;P35922-10;P35922-5;P35922-4;P35922-12;P35922-6	Fragile X mental retardation protein 1 homolog
		28.0598	27.9769	27.7136	27.5911	27.921	27.6409	27.503	28.2207	27.6978	27.5096	27.4051	27.5452	27.8974	27.541						7	7	7	NaN	NaN	NaN	NaN	0	NaN	6819400000	386	0.107677	0.732798	0.607055	0.335016	0.174137	1.06637	0.217544	-0.283868	-1.41022	0.101157	0.297812	2.00604	0.484855	0.160193	0.753941	P35979	P35979	60S ribosomal protein L12
		27.7833	27.5158	27.3679	27.5746	27.4485	27.42	27.4622	27.7065	27.804	27.7029	27.3659	27.7062	27.9512	27.6134						7	7	7	NaN	NaN	NaN	NaN	0	NaN	5960700000	324	0.131183	0.774262	0.355127	0.197268	-0.196555	-1.4866	0.435548	0.11503	0.8472	0.68872	-0.0639176	-0.424687	0.0842049	-0.247668	-2.15038	P35980	P35980	60S ribosomal protein L18
		26.1997	25.7997	25.319	26.2561	25.7768	25.8881	25.8668	26.2993	26.15	26.3904	25.9328	25.9068	26.5428	26.1244						13	13	13	NaN	NaN	NaN	NaN	0	NaN	2059200000	201	0.183594	0.773239	0.932015	0.367029	-0.297716	-0.991363	0.308782	0.199985	1.13253	0.38787	-0.264089	-0.945388	0.312746	-0.233612	-1.12223	P36371	P36371	Antigen peptide transporter 2
		23.5843	23.7037	24.2724	22.8895	23.5897	23.6269	24.1247	20.0675	23.1677	23.3119	23.8204	23.7429	20.1034	23.2295						2	2	2	NaN	NaN	NaN	NaN	NaN	NaN	332860000	21	0.664943	0.25792	0.838975	0.269134	1.25384	1.24253	0.626014	0.58112	0.518834	0.652623	0.179145	0.478292	0.749099	0.493572	0.337991	Q9CQC9;P36536	Q9CQC9;P36536	GTP-binding protein SAR1b;GTP-binding protein SAR1a
		22.1605	22.6442	22.2772	18.5698	22.2308	22.6413	22.331	22.7535	22.6741	21.9208	22.3509	22.2256	22.8034	22.0538						3	3	2	NaN	NaN	8	NaN	0	NaN	159450000	43	0.522287	0.297816	0.398139	0.444941	-0.948028	-0.828848	0.491286	-0.173893	-0.742295	0.465484	-0.902337	-0.789705	0.615922	0.128203	0.534464	P36993-2;P36993-4;P36993;P36993-3;P36993-5	P36993-2;P36993-4;P36993;P36993-3;P36993-5	Protein phosphatase 1B
		23.4356	23.0864	22.8059	23.6614	22.5972	23.2618	23.0193	22.9258	23.6167	23.272	23.3178	23.1321	23.533	23.1708						7	7	7	NaN	NaN	NaN	NaN	0	NaN	280340000	89	0.150439	0.17778	0.589283	0.904238	-0.0313303	-0.126536	0.0599121	0.451156	2.42277	0.548811	-0.154846	-0.642559	0.153239	-0.327641	-1.68279	P37040	P37040	NADPH--cytochrome P450 reductase
		21.9893	21.7787	22.6813	21.8312	22.1535	22.1792	22.3855	22.1989	22.1752	22.5574	22.6104	21.7746	22.0819	22.0359						4	4	4	NaN	NaN	NaN	NaN	0	NaN	131420000	39	0.706906	0.437341	0.0513548	0.699777	0.106001	0.408553	0.155431	0.218404	1.67177	0.224005	-0.377536	-1.3873	0.0477196	0.265133	2.60914	P38060	P38060	Hydroxymethylglutaryl-CoA lyase, mitochondrial
		27.6022	27.465	27.4717	27.6659	27.6192	27.4238	27.5453	27.8823	27.6427	27.7498	27.7321	27.8102	27.9304	27.6602						26	26	26	NaN	NaN	NaN	NaN	0	NaN	6279300000	883	0.0436827	0.312571	0.865419	0.036474	-0.24908	-2.83467	0.477824	0.0905229	0.7668	0.0602215	-0.157006	-2.4186	0.22537	-0.182597	-1.38254	P38647	P38647	Stress-70 protein, mitochondrial
		26.4221	26.3045	26.0145	26.3671	25.8985	25.9451	26.176	26.5062	26.3262	25.9937	26.0793	25.9009	26.4973	25.9964						22	22	22	NaN	NaN	NaN	NaN	0	NaN	2345900000	275	0.597043	0.534595	0.596662	0.47468	0.145507	0.772593	0.993223	0.00164493	0.00892663	0.338182	0.143938	1.05869	0.999745	-7.58171e-05	-0.000335915	P39054;P39054-2;Q8BZ98-2;Q8BZ98;P39053-5;P39053-3;P39053-6;P39053-4;P39053	P39054;P39054-2	Dynamin-2
		22.0128	21.4363	19.7639	20.5897	21.9787	21.7056	22.4361	20.0051	19.316	18.3451	19.2281	21.761	19.3245	20.9652						4	3	3	NaN	11	11	NaN	0	NaN	77651000	15	0.0250607	0.0726817	0.314869	0.762244	0.26711	0.31953	0.0128784	-2.56832	-3.78087	0.0262618	1.98762	3.11968	0.373815	0.847814	0.976164	P39688-2;P39688	P39688-2;P39688	Tyrosine-protein kinase Fyn
		24.042	24.246	23.9939	24.0991	23.8888	24.0904	24.2209	24.8653	24.1469	24.3178	24.0416	23.8991	24.3834	24.0535						6	6	6	NaN	NaN	NaN	NaN	0	NaN	562170000	39	0.787581	0.622454	0.453406	0.906766	-0.0167351	-0.123176	0.721375	-0.0975842	-0.377386	0.466645	-0.0735073	-0.78753	0.60111	0.154356	0.557677	P39749	P39749	Flap endonuclease 1
		29.6176	29.6675	29.7941	29.1378	29.6484	29.4571	29.8524	30.2385	29.713	29.5851	29.5669	29.183	29.2095	29.3721						28	28	28	NaN	NaN	NaN	NaN	0	NaN	24766000000	1012	0.105921	0.898906	0.0458106	0.15166	0.299403	1.69083	0.419074	-0.177418	-0.880131	0.714845	-0.0674206	-0.386762	0.0444404	0.544242	2.66827	P40124;Q9CYT6	P40124	Adenylyl cyclase-associated protein 1
		29.7443	30.0223	29.914	29.4191	29.9193	29.7681	30.1182	29.9244	29.9931	29.8784	29.634	29.6559	29.5049	29.729						31	31	31	NaN	NaN	NaN	NaN	0	NaN	28448000000	1345	0.266332	0.984177	0.108472	0.420474	0.145015	0.877294	0.463518	-0.0973303	-0.793394	0.750501	-0.0602249	-0.336016	0.0304906	0.302571	2.98877	P40142	P40142	Transketolase
		22.5943	21.552	19.6426	19.6776	18.5491	21.7643	21.4624	22.6126	21.4919	21.4874	18.6546	19.3558	22.4667	19.3834						1	1	1	NaN	NaN	NaN	NaN	0	NaN	73804000	16	0.582567	0.938122	0.839109	0.718973	0.464686	0.380831	0.690902	-0.552468	-0.421493	0.794095	0.321987	0.275307	0.630054	0.695166	0.512618	P40237	P40237	CD82 antigen
		18.1843	18.4339	20.3597	19.0714	19.0346	20.5562	20.5706	20.4502	18.7028	20.0139	20.9691	19.3732	20.9378	21.0301						2	2	2	NaN	NaN	NaN	NaN	NaN	NaN	27049000	10	0.273317	0.107582	0.574826	0.106717	-1.4347	-1.96417	0.7299	-0.257618	-0.365202	0.317694	-0.882964	-1.10953	0.660609	-0.294121	-0.466302	P40336;P40336-2	P40336;P40336-2	Vacuolar protein sorting-associated protein 26A
		25.2306	25.131	25.8041	26.0275	25.6335	25.3031	25.277	26.063	25.7108	25.4614	25.95	25.568	26.1346	25.6205						7	7	7	NaN	NaN	NaN	NaN	0	NaN	1541300000	80	0.369777	0.836614	0.907773	0.48364	-0.226089	-0.756153	0.600075	0.138234	0.559311	0.599042	-0.159115	-0.560944	0.473116	-0.205207	-0.775486	P40630-2;P40630	P40630-2;P40630	Transcription factor A, mitochondrial
		26.3596	26.5341	26.143	26.361	25.7878	25.9721	26.2194	25.5886	26.8472	26.3476	25.9791	26.3538	25.3669	26.175						6	6	6	NaN	NaN	NaN	NaN	0	NaN	2314000000	157	0.76709	0.0391271	0.935532	0.215576	0.384205	1.41733	0.11688	0.499319	1.89319	0.863166	-0.0418717	-0.181416	0.816597	-0.0732423	-0.24445	P41105	P41105	60S ribosomal protein L28
		17.8387	20.4266	17.8727	17.9833	18.1929	19.1394	17.9175	17.466	20.2518	18.1079	19.2557	18.591	18.0047	19.1824						1	1	1	NaN	NaN	NaN	NaN	NaN	NaN	3132400	5	0.320617	0.389957	0.8072	0.940943	-0.0623821	-0.0778813	0.183962	1.02617	1.54095	0.49199	-0.674795	-0.741027	0.45054	-0.41376	-0.818049	P41155	P41155	Lymphotoxin-beta
		25.3634	25.4151	25.0896	24.9718	25.2341	25.0493	25.2648	25.3205	24.9456	24.9979	25.1196	25.152	24.9629	25.0075						11	11	11	NaN	NaN	NaN	NaN	0	NaN	1126800000	118	0.0432678	0.874978	0.938202	0.26586	0.169139	1.25226	0.0618149	-0.196161	-2.39746	0.216187	0.188927	1.41512	0.0907701	0.176373	2.09112	P41241	P41241	Tyrosine-protein kinase CSK
		19.754	20.3339	21.6286	19.1792	20.2684	21.3683	21.0517	21.3659	20.0206	20.394	20.7641	19.774	20.5783	20.2753						3	3	3	NaN	NaN	NaN	NaN	0	NaN	50145000	16	0.411445	0.33387	0.218485	0.982801	0.0147384	0.0226556	0.141235	-0.620669	-1.74608	0.803964	-0.169008	-0.261738	0.0782069	0.804415	2.20896	P41272	P41272	CD27 antigen
		24.699	24.294	24.2991	24.8128	24.1186	23.9747	24.4169	24.0587	23.8002	24.3117	24.0239	23.9194	23.8617	24.0547						6	6	6	NaN	NaN	NaN	NaN	0	NaN	610120000	112	0.0167832	0.0489855	0.257559	0.0174116	0.580941	3.49315	0.589109	-0.0970194	-0.576735	0.0628709	0.480987	2.38377	0.171512	0.196973	1.59539	P42125	P42125	Enoyl-CoA delta isomerase 1, mitochondrial
		22.2864	21.5472	22.2886	22.1744	22.0476	21.8959	21.9611	22.1994	21.7452	20.837	21.5742	21.87	21.1217	21.9221						4	4	4	NaN	NaN	NaN	NaN	0	NaN	122370000	29	0.0198752	0.683962	0.457519	0.207818	0.436156	1.44597	0.0478597	-0.640508	-2.60671	0.0797102	0.68866	2.19384	0.152172	0.388004	1.68821	P42128	P42128	Forkhead box protein K1
		23.9475	24.0402	23.8287	24.1178	23.9976	23.7315	23.7188	23.6875	23.8318	23.7512	23.6037	23.9759	23.6085	23.8633						8	8	8	NaN	NaN	NaN	NaN	0	NaN	449620000	130	0.18158	0.340181	0.094186	0.21128	0.167683	1.43307	0.612309	-0.0549439	-0.540096	0.0401133	0.254663	2.75412	0.807126	-0.0320363	-0.257402	P42208	P42208	Septin-2
		26.4412	26.3687	26.3127	25.8491	26.3211	26.2569	26.3362	26.4786	26.2148	25.8477	26.1533	26.3079	25.9684	26.0356						12	12	12	NaN	NaN	NaN	NaN	0	NaN	2431800000	242	0.0779529	0.496252	0.736245	0.476496	0.138955	0.769244	0.0535799	-0.27626	-2.51378	0.397021	0.170989	0.925833	0.0637731	0.244226	2.37227	P42209	P42209	Septin-1
		26.7757	27.1886	26.4862	26.4506	26.5961	26.7608	26.8534	26.9527	26.376	26.7552	26.4491	26.4629	26.7162	26.4608						20	20	20	NaN	NaN	NaN	NaN	0	NaN	3408800000	405	0.109111	0.71996	0.859875	0.442118	0.17863	0.834333	0.102444	-0.263976	-1.99613	0.416405	0.198511	0.885561	0.0859115	0.244095	2.13452	P42225	P42225	Signal transducer and activator of transcription 1
		24.2315	24.5418	23.6896	23.9566	24.2764	24.0209	24.0447	24.0091	23.8118	23.6343	23.9193	24.3137	24.099	23.7896						8	8	8	NaN	NaN	NaN	NaN	0	NaN	530990000	123	0.242472	0.432086	0.30028	0.88737	0.0374082	0.14901	0.03267	-0.299311	-2.92902	0.222648	0.316404	1.39207	0.895943	0.0203155	0.137577	P42227-2;P42227-3;P42227	P42227-2;P42227-3;P42227	Signal transducer and activator of transcription 3
		22.612	22.1552	21.5686	21.9262	22.1382	21.7454	21.809	21.981	20.9225	21.5469	21.509	22.8767	21.944	22.2788						4	4	4	NaN	NaN	NaN	NaN	0	NaN	128940000	40	0.481129	0.0961749	0.01375	0.422775	-0.300959	-0.872649	0.0308928	-0.592289	-2.97739	0.0621329	0.73938	2.39331	0.134494	-0.448049	-1.78404	P42228	P42228	Signal transducer and activator of transcription 4
		21.9269	21.9757	20.8002	20.9745	21.1972	20.7988	19.5987	20.9744	20.3834	21.0505	20.4096	21.1406	21.1171	21.2744						19	2	2	NaN	NaN	NaN	NaN	0	NaN	63773000	21	0.65712	0.50287	0.0463804	0.540249	0.241963	0.656941	0.954245	-0.0277697	-0.0603105	0.106236	0.804812	1.9677	0.263322	-0.535079	-1.25987	P42230	P42230	Signal transducer and activator of transcription 5A
		25.5372	25.8723	25.1069	25.4181	25.5745	25.2928	25.3125	25.0195	25.2708	25.4364	25.0396	25.5571	24.9195	25.211						21	21	4	NaN	NaN	8	NaN	0	NaN	1250100000	205	0.322529	0.452493	0.58846	0.342113	0.254409	1.04924	0.770415	-0.050873	-0.308118	0.315593	0.234631	1.1149	0.743628	0.0706503	0.345715	P42232	P42232	Signal transducer and activator of transcription 5B
		23.1624	23.3632	23.3392	22.6853	23.2409	23.0078	23.2476	23.3791	23.4256	23.2278	23.1289	22.8696	23.1736	23.2188						8	8	8	NaN	NaN	NaN	NaN	0	NaN	287480000	71	0.972933	0.81795	0.309806	0.818432	0.0501898	0.241946	0.734698	0.0419057	0.358373	0.564458	-0.123246	-0.616648	0.356248	0.13153	1.01599	P42567;P42567-2	P42567;P42567-2	Epidermal growth factor receptor substrate 15
		24.8249	24.8041	24.5374	24.7769	24.8808	24.5123	24.6658	24.6798	24.451	25.0333	24.334	24.8264	24.6374	24.7305						8	8	8	43	43	43	NaN	0	NaN	823950000	148	0.715784	0.827557	0.444109	0.963697	0.00436958	0.0478384	0.712929	-0.078612	-0.389522	0.540191	0.129739	0.657038	0.66104	-0.0467574	-0.465658	P42669	P42669	Transcriptional activator protein Pur-alpha
		27.857	28.1082	27.8192	27.8183	27.9588	27.7242	28.1592	28.2431	28.0317	28.0483	27.8201	28.0458	28.3192	28.1574						26	26	26	52	52	52	NaN	0	NaN	8013000000	570	0.26083	0.113039	0.646531	0.0493808	-0.273458	-2.58086	0.73064	-0.0546088	-0.364147	0.54944	-0.0660205	-0.641508	0.361022	-0.152829	-1.00501	P42932	P42932	T-complex protein 1 subunit theta
		22.0137	22.1048	20.5305	21.593	20.9454	21.3553	21.5207	21.6114	20.4243	20.9531	21.0827	22.3481	20.8341	21.0309						6	6	6	NaN	NaN	NaN	NaN	0	NaN	85526000	28	0.297669	0.675535	0.24163	0.79972	0.15614	0.267566	0.0772468	-0.538154	-2.21878	0.16773	0.740436	1.61269	0.919507	-0.0461429	-0.106261	P43247	P43247	DNA mismatch repair protein Msh2
		31.627	31.83	31.8734	32.2671	32.0077	31.6955	30.8345	31.2281	31.2763	31.2393	31.5506	31.4244	31.6331	32.535						20	6	6	NaN	16	16	NaN	0	NaN	103310000000	1023	0.794996	0.85001	0.0592189	0.91827	0.0351912	0.107901	0.796433	-0.0860359	-0.272086	0.0284536	0.543955	3.0491	0.358033	-0.422728	-1.01187	P43274	P43274	Histone H1.4
		30.8656	30.7993	31.4399	31.8892	31.4762	31.3879	31.241	31.2796	31.402	31.0166	31.6041	31.5567	31.1344	31.9799						14	10	10	38	NaN	NaN	NaN	0	NaN	83768000000	1263	0.464973	0.469658	0.772758	0.438649	-0.308483	-0.84111	0.974487	-0.00529019	-0.0336121	0.794958	-0.0923875	-0.274118	0.369312	-0.210805	-0.986223	P43275	P43275	Histone H1.1
		32.1761	32.3251	32.4585	32.8846	32.6515	32.2768	31.9029	31.8507	32.3165	32.2244	32.1798	32.3444	32.0332	33.2273						20	14	14	NaN	NaN	NaN	NaN	0	NaN	166670000000	1312	0.736051	0.850235	0.188291	0.840853	-0.0739021	-0.211493	0.766954	0.0697831	0.312946	0.282852	0.220816	1.20293	0.371759	-0.364501	-0.980746	P43276	P43276	Histone H1.5
		31.7332	31.8806	31.9442	31.1764	32.313	31.3599	28.9847	30.5366	30.6936	29.8466	31.5372	31.0385	29.2315	33.5287						22	7	4	NaN	NaN	10	NaN	0	NaN	96156000000	658	0.718457	0.717613	0.32566	0.710642	0.417387	0.392819	0.913537	-0.106069	-0.114182	0.082605	0.991139	2.16556	0.740388	-0.467683	-0.3503	P43277	P43277	Histone H1.3
		28.5326	28.6634	28.824	28.1578	28.7094	28.6121	28.8813	28.4458	28.5172	28.4953	28.6612	28.2871	27.862	28.4305						17	17	17	NaN	NaN	NaN	NaN	0	NaN	11875000000	586	0.0975991	0.486923	0.0817228	0.172061	0.351253	1.5929	0.41088	-0.104249	-0.896887	0.94124	-0.0134478	-0.0774891	0.0470545	0.46895	2.62076	P45376	P45376	Aldose reductase
		22.5805	23.0131	23.2328	23.342	22.5201	23.1219	23.6402	23.5228	23.5699	23.5882	23.1213	23.5996	24.1739	23.0611						3	3	3	NaN	NaN	NaN	NaN	0	NaN	326450000	27	0.119365	0.477879	0.956718	0.149532	-0.56939	-1.70178	0.519379	0.225217	0.692645	0.165311	-0.384322	-1.62396	0.35434	-0.410285	-1.02041	P45878	P45878	Peptidyl-prolyl cis-trans isomerase FKBP2
		24.6544	24.1534	24.1209	24.0132	24.6405	24.0986	24.4439	24.0254	24.0872	23.8527	24.4444	24.8203	23.6346	24.5418						7	7	7	NaN	NaN	NaN	NaN	0	NaN	610990000	112	0.854525	0.550379	0.744524	0.789754	-0.096734	-0.281295	0.472559	-0.173953	-0.776519	0.649061	0.107361	0.483666	0.933811	-0.0301418	-0.0873142	P45952	P45952	Medium-chain specific acyl-CoA dehydrogenase, mitochondrial
		26.1734	26.0158	25.7771	25.8884	25.825	25.8005	25.8978	26.2705	25.9713	25.8513	25.6796	25.9084	26.2957	25.9348						15	15	15	28	28	28	NaN	0	NaN	2367900000	227	0.881237	0.440594	0.297609	0.593947	-0.082647	-0.569025	0.4731	-0.114372	-0.775517	0.341178	0.129582	1.05148	0.581825	-0.0978576	-0.588419	P46061	P46061	Ran GTPase-activating protein 1
		24.5523	24.5779	25.3259	24.1053	24.6556	25.1376	25.0835	25.7209	24.9975	25.2449	25.1538	24.5284	25.1104	24.7952						5	5	5	35	35	35	NaN	0	NaN	1035200000	159	0.724877	0.481827	0.0790613	0.627239	-0.170984	-0.516947	0.950539	-0.0173408	-0.0652035	0.168245	-0.491734	-1.61031	0.303279	0.338091	1.14702	P46414	P46414	Cyclin-dependent kinase inhibitor 1B
		25.0026	24.9414	24.4383	24.8218	25.0609	24.7206	24.9157	25.452	24.9474	25.2176	24.8757	24.9138	25.3288	25.0337						12	12	12	19	19	19	NaN	0	NaN	942230000	164	0.349565	0.239392	0.575619	0.170398	-0.291078	-1.60044	0.911422	-0.023729	-0.11699	0.274629	-0.212496	-1.22646	0.804566	-0.0548525	-0.260911	P46460	P46460	Vesicle-fusing ATPase
		22.5624	23.425	22.5106	22.6086	23.1687	22.615	22.8486	21.6994	20.7953	21.9037	21.7747	23.2544	20.1363	23.0366						4	4	4	NaN	NaN	NaN	NaN	0	NaN	201850000	49	0.114785	0.740477	0.417536	0.503005	0.634204	0.721348	0.0697289	-1.09166	-2.3005	0.0214649	1.28535	3.30045	0.652294	0.440508	0.478788	P46467	P46467	Vacuolar protein sorting-associated protein 4B
		24.5863	25.0246	24.6738	24.449	24.709	24.9987	24.736	25.4457	24.811	25.0451	24.9863	24.7876	25.2834	24.7323						10	10	10	NaN	NaN	NaN	NaN	0	NaN	915330000	102	0.460751	0.299841	0.329698	0.278236	-0.250985	-1.21606	0.910523	-0.0248717	-0.118184	0.152824	-0.264065	-1.6849	0.885114	0.0379516	0.152021	P46471	P46471	26S protease regulatory subunit 7
		27.3471	27.4011	27.5159	27.9011	27.4783	27.5796	27.5001	27.7458	27.5761	27.4732	27.8343	27.6531	27.586	27.8388						12	12	12	NaN	NaN	NaN	NaN	0	NaN	6010200000	375	0.328194	0.637477	0.881917	0.389984	-0.151327	-0.940838	0.670523	0.0519247	0.451524	0.638144	-0.0865612	-0.500236	0.276945	-0.116691	-1.21977	P46638;P62492;Q9WTL2	P46638;P62492	Ras-related protein Rab-11B;Ras-related protein Rab-11A
		24.4772	24.4399	24.3108	23.6981	24.2098	24.0053	23.9226	23.9657	24.0192	23.3596	23.6243	24.0609	23.8412	23.8028						8	8	8	NaN	NaN	NaN	NaN	0	NaN	554680000	89	0.0371018	0.905568	0.155619	0.202372	0.329816	1.46669	0.0991125	-0.358144	-2.02204	0.0892181	0.56378	2.10471	0.273279	0.124181	1.23038	P46664;P28650;P28650-2	P46664	Adenylosuccinate synthetase isozyme 2
		22.7203	23.294	23.1271	22.9151	22.5275	23.1483	23.1871	23.2877	23.2413	23.4821	22.7384	22.529	23.2448	23.2728						6	6	6	NaN	NaN	NaN	NaN	0	NaN	266260000	86	0.758478	0.808474	0.672957	0.995749	-0.00140905	-0.00559923	0.689418	0.116258	0.423665	0.578631	-0.139773	-0.59357	0.941874	0.0221066	0.0766509	P46737;P46737-2	P46737;P46737-2	Lys-63-specific deubiquitinase BRCC36
		24.1625	24.1802	23.9837	24.9314	24.1112	24.41	24.577	24.5368	25.1211	24.7146	24.6941	24.5853	25.0194	24.9061						6	6	6	NaN	NaN	NaN	NaN	0	NaN	739380000	99	0.0137229	0.75383	0.760268	0.112452	-0.522465	-1.9233	0.0513972	0.434505	2.5479	0.112282	-0.528778	-1.92448	0.048973	-0.428192	-2.5877	P46978	P46978	Dolichyl-diphosphooligosaccharide--protein glycosyltransferase subunit STT3A
		23.4175	23.5305	24.0641	24.2622	23.4595	23.4599	24.4749	23.9242	24.2575	24.2799	24.2537	24.3811	24.5776	24.1983						9	9	9	NaN	NaN	NaN	NaN	0	NaN	532440000	116	0.0265553	0.764932	0.779303	0.0797337	-0.5671	-2.1936	0.189094	0.434079	1.51955	0.125046	-0.445129	-1.84063	0.122919	-0.55605	-1.85397	P47738	P47738	Aldehyde dehydrogenase, mitochondrial
		23.0767	22.9134	22.9385	23.4297	22.8037	23.0427	22.9987	22.9784	23.2797	23.5748	22.9549	23.1093	23.3013	23.1928						3	3	3	NaN	NaN	NaN	NaN	0	NaN	261170000	48	0.0814602	0.3532	0.773319	0.485481	-0.111565	-0.752803	0.110578	0.313949	1.93642	0.420563	-0.180253	-0.877114	0.025035	-0.245261	-3.16213	P47740	P47740	Fatty aldehyde dehydrogenase
		27.7708	27.6912	27.9716	27.6689	28.0221	27.745	27.7927	28.2512	27.4805	27.273	27.772	27.9251	27.8872	27.8434						12	10	10	NaN	NaN	NaN	NaN	0	NaN	7443600000	616	0.128038	0.0250612	0.345515	0.247948	-0.109646	-1.30745	0.0599351	-0.444263	-2.42246	0.126727	0.267131	1.83025	0.648193	0.0674861	0.484978	P47753	P47753	F-actin-capping protein subunit alpha-1
		28.0043	27.8771	28.1219	27.9455	28.0724	28.2373	28.1409	28.0296	27.6516	27.7155	28.0675	28.1184	27.6274	27.9536						16	16	14	NaN	NaN	NaN	NaN	0	NaN	8125300000	671	0.0540678	0.233979	0.810653	0.547138	0.0873973	0.645358	0.0509629	-0.308483	-2.55488	0.217104	0.175623	1.41181	0.15626	0.220257	1.66765	P47754	P47754	F-actin-capping protein subunit alpha-2
		27.7072	27.9974	28.2219	27.4679	27.8637	27.9348	28.2087	28.6613	27.9811	27.9487	27.8917	27.508	28.0867	27.6929						17	17	17	NaN	NaN	NaN	NaN	0	NaN	8086200000	581	0.35659	0.523858	0.155895	0.736417	0.0860573	0.355932	0.340028	-0.226628	-1.05424	0.659461	-0.0918964	-0.46802	0.176424	0.404582	1.57346	P47757-2;P47757-4;P47757	P47757-2;P47757-4;P47757	F-actin-capping protein subunit beta
		23.7634	23.7043	23.27	23.8899	23.4496	23.6231	23.4483	23.574	23.7338	23.6667	23.6782	23.6476	23.94	23.7187						8	8	8	NaN	NaN	NaN	NaN	0	NaN	401370000	174	0.157787	0.642766	0.282513	0.551971	-0.111862	-0.637287	0.0280692	0.169103	3.06103	0.831263	-0.0359761	-0.224488	0.0423334	-0.244989	-2.70887	P47758	P47758	Signal recognition particle receptor subunit beta
		22.9982	21.966	22.6311	22.6257	18.9147	22.8948	22.7578	23.1499	22.6264	23.033	22.9252	19.3436	23.6905	23.0502						2	2	2	NaN	NaN	NaN	NaN	NaN	NaN	190540000	12	0.81305	0.406827	0.903486	0.669028	0.52714	0.453744	0.471392	0.932219	0.778685	0.314262	-0.306277	-1.11832	0.954449	-0.0988013	-0.0600409	P47774	P47774	C-C chemokine receptor type 7
		26.7759	27.1171	26.7718	26.6718	27.0199	26.7797	27.1881	26.8091	25.901	26.5127	26.8403	26.4082	26.3191	27.0261						11	11	10	NaN	NaN	NaN	NaN	0	NaN	3484700000	287	0.0431393	0.430657	0.881738	0.305465	0.249667	1.14124	0.0933587	-0.531183	-2.069	0.166948	0.416163	1.61632	0.15505	0.364686	1.67368	P47791-2;P47791	P47791-2;P47791	Glutathione reductase, mitochondrial
		22.5259	22.1475	22.2432	22.2948	22.2607	21.8104	21.8266	22.4778	22.5268	22.8162	22.2906	22.5534	22.9984	21.9222						5	5	5	NaN	NaN	NaN	NaN	0	NaN	140280000	32	0.10859	0.446677	0.676865	0.527866	-0.188479	-0.678012	0.110999	0.450643	1.93345	0.188479	-0.241707	-1.52208	0.277406	-0.397415	-1.21844	P47802	P47802	Metaxin-1
		22.7107	19.3632	22.1521	22.4053	22.093	21.4806	21.7742	21.7278	18.2893	19.6649	21.8068	21.8191	21.3867	21.7888						3	3	3	NaN	NaN	NaN	NaN	0	NaN	110390000	8	0.176869	0.224979	0.226471	0.99418	-0.0070715	-0.00766626	0.0867351	-1.84855	-2.12698	0.224252	1.73744	1.38644	0.605846	0.104032	0.550218	P47811-2;P47811-3;P47811;P47811-4	P47811-2;P47811-3;P47811	Mitogen-activated protein kinase 14
		19.0708	19.7604	18.638	20.0293	19.6067	19.4421	20.0522	19.4523	20.0061	19.3295	19.0599	19.4375	19.1494	19.3675						3	3	3	NaN	NaN	NaN	NaN	0	NaN	20556000	11	0.642896	0.720026	0.412563	0.888479	0.0565066	0.147529	0.576413	-0.173139	-0.597159	0.846351	-0.0905436	-0.204061	0.142491	0.320189	1.7392	P47856-2;P47856	P47856-2;P47856	Glutamine--fructose-6-phosphate aminotransferase [isomerizing] 1
		28.4648	28.4408	28.2224	28.6588	28.1498	28.2592	27.9724	27.9749	28.3501	28.3468	28.2959	28.3013	27.6753	28.1914						13	13	13	NaN	NaN	NaN	NaN	0	NaN	9213800000	456	0.495894	0.0114186	0.702917	0.0987368	0.390695	2.02501	0.0352344	0.241862	2.86416	0.327341	0.115749	1.08525	0.862598	0.0330841	0.18218	P47911	P47911	60S ribosomal protein L6
		25.0952	25.8905	25.2119	25.7116	24.7372	25.319	25.5462	22.3482	26.2812	26.1878	25.1642	25.1162	22.3447	25.2778						2	2	2	NaN	NaN	NaN	NaN	NaN	NaN	1234900000	54	0.900172	0.06557	0.614918	0.197308	1.23103	1.48645	0.190279	1.39009	1.51469	0.335299	-0.400436	-1.06568	0.845683	0.241382	0.204964	P47915	P47915	60S ribosomal protein L29
		23.1436	23.51	23.3329	23.0304	23.5882	23.0636	23.2128	23.8374	23.0253	23.2018	23.0644	23.3915	23.5157	23.4316						6	6	6	33	33	33	NaN	0	NaN	319920000	116	0.59613	0.0723843	0.491433	0.195895	-0.192027	-1.49204	0.184138	-0.328327	-1.5402	0.290017	0.157072	1.18292	0.925279	-0.0207725	-0.09861	P47941	P47941	Crk-like protein
		27.4436	26.928	26.3554	27.2161	27.0683	26.0914	26.1929	26.1952	26.9179	26.4063	26.1094	27.4782	27.041	27.0598						4	4	4	NaN	NaN	NaN	NaN	0	NaN	3657800000	232	0.523782	0.876228	0.0155289	0.524039	-0.207243	-0.68459	0.796795	0.0909119	0.271588	0.196769	0.507905	1.48858	0.0413553	-0.806061	-2.72848	P47955	P47955	60S acidic ribosomal protein P1
		26.6733	26.7029	26.4493	26.5339	27.0206	26.6037	26.6998	26.6637	26.5935	26.2674	26.457	26.8353	27.0785	26.8735						13	13	13	NaN	NaN	NaN	NaN	0	NaN	3130000000	269	0.852612	0.00441084	0.0722526	0.0158222	-0.339231	-3.58315	0.0729323	-0.307661	-2.26458	0.214598	0.150581	1.42089	0.211683	-0.182151	-1.43158	P47962	P47962	60S ribosomal protein L5
		27.2095	27.2596	27.0861	27.009	26.9188	27.2881	27.0593	27.7131	27.5919	27.1434	26.9748	26.9877	27.5743	26.8976						9	9	9	NaN	NaN	NaN	NaN	0	NaN	4576200000	348	0.990198	0.884737	0.570738	0.951495	-0.0121446	-0.0639409	0.975997	-0.00812117	-0.0316219	0.594377	-0.0956343	-0.568341	0.749509	0.0916109	0.337413	P47963	P47963	60S ribosomal protein L13
		24.7755	25.3537	25.5624	25.0895	25.0203	25.1967	25.2836	25.3681	25.6592	25.2294	25.2407	25.0052	26.2438	24.9254						2	2	2	NaN	NaN	NaN	NaN	0	NaN	1279800000	94	0.433539	0.931732	0.987676	0.652443	-0.196172	-0.478564	0.329394	0.159281	1.08016	0.472878	-0.181176	-0.775928	0.655563	-0.174277	-0.47387	P47964	P47964	60S ribosomal protein L36
		21.3981	19.1445	21.6221	21.794	21.6371	21.407	22.5946	20.9848	19.5042	19.9277	21.4344	22.174	20.9959	22.0038						2	2	2	NaN	NaN	NaN	NaN	0	NaN	102340000	10	0.548465	0.076218	0.467062	0.398169	-0.73492	-0.923405	0.083802	-1.3671	-2.15417	0.46313	0.700885	0.794124	0.897522	-0.0687079	-0.135475	P47968	P47968	Ribose-5-phosphate isomerase
		24.0117	23.9479	24.3268	23.6967	24.324	24.088	24.1746	25.1497	23.5223	23.9466	23.9068	24.292	23.7197	24.2391						5	5	5	NaN	NaN	NaN	NaN	0	NaN	567420000	96	0.17298	0.0723222	0.706057	0.701585	-0.0878641	-0.405926	0.0927033	-0.642148	-2.07454	0.333758	0.203842	1.06944	0.331622	0.350442	1.07468	P48024;Q9CXU9	P48024;Q9CXU9	Eukaryotic translation initiation factor 1;Eukaryotic translation initiation factor 1b
		28.0464	28.1513	28.1695	28.1231	28.1234	28.1658	28.2713	28.1714	27.9664	28.0097	28.1888	27.9704	27.7529	28.2252						16	16	16	NaN	NaN	NaN	NaN	0	NaN	8585200000	507	0.0785872	0.958485	0.355165	0.291755	0.139737	1.17814	0.118256	-0.128026	-1.88407	0.348322	0.0676198	1.0345	0.156367	0.200144	1.66712	P48036	P48036	Annexin A5
		24.3672	23.9712	24.2923	24.4456	24.294	24.425	24.2611	24.4401	24.4621	24.7222	24.595	24.3865	25.0641	24.6293						10	10	10	NaN	NaN	NaN	NaN	0	NaN	674060000	180	0.013881	0.42252	0.950113	0.0951834	-0.424242	-2.05378	0.0345415	0.238053	2.88115	0.0661108	-0.324011	-2.34327	0.10994	-0.338284	-1.94093	P48193-2;P48193	P48193-2;P48193	Protein 4.1
		19.4474	20.8412	20.3138	20.7681	20.1343	20.2512	20.2282	20.7876	18.5083	20.1316	20.2929	20.6974	21.2928	20.5519						3	3	3	NaN	NaN	NaN	NaN	0	NaN	42106000	14	0.767075	0.143295	0.100903	0.28725	-0.504693	-1.1906	0.223188	-0.706057	-1.39017	0.303481	0.698374	1.14648	0.11206	-0.497009	-1.92602	P48377	P48377	MHC class II regulatory factor RFX1
		24.1223	24.1516	24.524	23.2068	24.3393	24.5123	25.1182	25.3076	24.2636	24.9361	24.0946	24.0889	23.6107	24.2607						5	5	5	NaN	NaN	NaN	NaN	0	NaN	669960000	64	0.447279	0.297005	0.0323812	0.970322	0.0144382	0.0391028	0.317929	-0.387894	-1.10893	0.32583	-0.430256	-1.08901	0.0482864	0.832588	2.59937	P48428	P48428	Tubulin-specific chaperone A
		23.3709	23.7236	23.4789	23.1691	23.2845	23.6103	23.6442	23.6069	23.5753	23.4827	23.6737	23.1197	23.5997	23.3257						4	4	4	9	9	9	NaN	0	NaN	347330000	81	0.829531	0.705742	0.148298	0.647225	0.0872836	0.486442	0.726182	0.0407653	0.370509	0.371222	-0.1416	-0.981944	0.274452	0.188118	1.22697	P48453-2;P48453;P63328-2;P63328;P48455	P48453-2;P48453;P63328-2;P63328;P48455	Serine/threonine-protein phosphatase 2B catalytic subunit beta isoform;Serine/threonine-protein phosphatase 2B catalytic subunit alpha isoform;Serine/threonine-protein phosphatase 2B catalytic subunit gamma isoform
		24.877	24.7787	25.3155	25.6898	24.8383	25.3521	24.6703	25.3095	25.1013	25.1886	25.3674	24.986	25.4963	25.0227						13	11	11	NaN	NaN	NaN	NaN	0	NaN	1126200000	138	0.623118	0.611801	0.843189	0.991679	-0.0031147	-0.0109597	0.44227	0.176572	0.834038	0.842368	-0.0538699	-0.209444	0.627795	-0.125817	-0.516091	P48678;P48678-2;P48678-3	P48678;P48678-2;P48678-3	Prelamin-A/C;Lamin-A/C
		26.5325	26.6436	26.5401	26.0285	26.6585	26.3776	26.4012	26.6755	26.1144	26.4473	26.4651	26.1602	26.0416	26.3294						13	13	12	NaN	NaN	NaN	NaN	0	NaN	2648400000	305	0.0740195	0.872233	0.275744	0.204922	0.259116	1.45693	0.225976	-0.185936	-1.38044	0.640936	0.0939145	0.495983	0.0309366	0.351138	2.97616	P48758	P48758	Carbonyl reductase [NADPH] 1
		21.8658	22.5167	20.76	20.9931	21.0189	20.4473	21.0704	20.5269	20.1732	20.7808	20.8554	21.1931	21.743	21.2566						4	4	4	NaN	NaN	NaN	NaN	0	NaN	76502000	14	0.608631	0.732537	0.0200807	0.796264	0.136337	0.27232	0.563997	-0.162724	-0.617404	0.128805	0.930721	1.81761	0.0468253	-0.63166	-2.62481	P49117	P49117	Nuclear receptor subfamily 2 group C member 2
		24.8383	24.4867	23.6235	23.7002	25.2277	23.005	23.4419	23.7701	22.6012	23.576	23.6764	23.8912	25.6078	24.7791						5	5	5	NaN	NaN	NaN	NaN	0	NaN	606440000	9	0.980932	0.293638	0.0603	0.322633	-0.597183	-1.09702	0.40759	-0.57663	-0.903686	0.111408	0.877646	1.93057	0.25857	-0.898199	-1.2743	P49222	P49222	Erythrocyte membrane protein band 4.2
		27.5071	27.6364	27.5072	27.317	27.4652	27.5824	27.1182	28.1502	27.4471	27.5082	27.4563	27.5356	27.8127	27.4092						17	14	14	NaN	NaN	NaN	NaN	0	NaN	6056200000	395	0.960143	0.496281	0.922759	0.491072	-0.0939366	-0.742681	0.687261	-0.108484	-0.426825	0.79851	0.0213881	0.269229	0.980947	-0.00684086	-0.0250989	P49312;P49312-2	P49312;P49312-2	Heterogeneous nuclear ribonucleoprotein A1;Heterogeneous nuclear ribonucleoprotein A1, N-terminally processed
		23.4024	23.6401	23.1106	23.0027	23.6286	23.2943	23.8346	23.5042	23.1206	23.4783	23.4659	22.8994	22.914	23.1453						5	5	5	NaN	NaN	NaN	NaN	0	NaN	346170000	111	0.0646735	0.999861	0.0260769	0.15952	0.302724	1.65163	0.260531	-0.210512	-1.26831	0.751196	-0.0659711	-0.335038	0.0117305	0.579207	3.8725	P49442	P49442	Inositol polyphosphate 1-phosphatase
		21.3392	22.3284	22.3143	19.6535	21.7686	21.8145	21.8221	22.5242	21.9219	20.0226	22.0938	21.4117	21.7376	21.5771						3	2	2	NaN	11	11	NaN	0	NaN	119690000	17	0.633995	0.389212	0.726493	0.832679	-0.166631	-0.222566	0.333872	-0.636249	-1.06916	0.948738	0.0627669	0.0675817	0.134664	0.406851	1.78305	P49443	P49443	Protein phosphatase 1A
		26.8719	27.3366	27.4595	26.699	27.4038	27.5067	27.6083	27.5172	27.6887	27.5942	27.2752	26.9079	27.4249	27.0384						18	18	18	NaN	NaN	NaN	NaN	0	NaN	5237900000	366	0.881447	0.626111	0.014902	0.903729	-0.0320009	-0.127214	0.93214	0.0103661	0.0895251	0.134281	-0.427622	-1.78527	0.0392576	0.385255	2.77231	P49710	P49710	Hematopoietic lineage cell-specific protein
		23.764	23.8721	23.6886	23.6557	23.9275	23.6503	23.7224	24.0336	24.0623	23.6913	23.2026	24.0813	24.1193	23.6191						7	7	7	NaN	NaN	NaN	NaN	0	NaN	438460000	73	0.962138	0.23069	0.485288	0.239728	-0.194802	-1.33403	0.472056	-0.181404	-0.777451	0.684504	0.0930312	0.430873	0.560366	-0.106429	-0.623379	P49717	P49717	DNA replication licensing factor MCM4
		23.2302	23.4987	22.7145	23.1376	23.2408	22.9408	23.1091	23.3188	23.2897	22.9952	22.7788	23.8914	23.1671	22.9683						7	7	7	NaN	NaN	NaN	NaN	0	NaN	274830000	54	0.851282	0.422379	0.380438	0.545001	-0.196995	-0.64894	0.443939	-0.131163	-0.830792	0.611146	0.124065	0.541912	0.488804	-0.189897	-0.746777	P49718	P49718	DNA replication licensing factor MCM5
		25.7134	25.6014	25.4152	25.5249	25.7414	25.245	25.3789	25.386	24.7367	25.2868	25.0735	25.7935	24.8034	25.3666						7	7	7	NaN	NaN	NaN	NaN	0	NaN	1345000000	175	0.0639042	0.743463	0.212177	0.378409	0.242613	0.966004	0.0783993	-0.405492	-2.20701	0.0178865	0.531418	3.46807	0.684528	0.116687	0.430837	P49722	P49722	Proteasome subunit alpha type-2
		22.1513	21.0423	21.2179	21.4579	21.7278	20.9959	21.4948	21.9188	21.2744	21.106	21.0276	21.1674	21.8928	21.7133						2	2	2	NaN	NaN	NaN	NaN	0	NaN	84885000	31	0.527177	0.286717	0.375966	0.731289	-0.123827	-0.363223	0.162916	-0.398309	-1.63529	0.311365	0.331352	1.1258	0.856251	-0.0568703	-0.190714	P49962	P49962	Signal recognition particle 9 kDa protein
		21.5299	22.7809	22.8599	22.7876	22.9312	22.8604	23.2073	23.3525	22.5973	22.9383	22.9769	22.7894	22.8226	23.2758						6	5	5	NaN	NaN	NaN	NaN	0	NaN	234540000	41	0.62037	0.09653	0.303025	0.291397	-0.473026	-1.17912	0.200955	-0.250328	-1.47217	0.41575	-0.347912	-0.886898	0.538295	0.125214	0.660243	P50096	P50096	Inosine-5-monophosphate dehydrogenase 1
		22.329	21.8745	22.0764	22.7257	22.3459	21.404	21.9442	21.8229	22.3228	22.0262	22.288	21.8748	21.8237	22.4758						5	5	5	32	32	32	NaN	0	NaN	130110000	52	0.713126	0.15835	0.568426	0.519055	0.19332	0.693206	0.227791	0.333096	1.37416	0.872146	0.0390733	0.169369	0.562633	-0.17885	-0.619647	P50171;P50171-2	P50171;P50171-2	Estradiol 17-beta-dehydrogenase 8
		21.8755	23.0505	22.5174	23.788	22.6092	23.3301	22.8729	23.1954	23.1394	23.4839	23.4991	23.4768	23.5197	23.7498						3	3	3	NaN	NaN	NaN	NaN	0	NaN	267130000	60	0.0561175	0.463935	0.979693	0.171286	-0.774265	-1.59641	0.144985	0.372223	1.72574	0.29979	-0.566318	-1.15633	0.0364769	-0.580171	-2.8346	P50172	P50172	Corticosteroid 11-beta-dehydrogenase isozyme 1
		28.7785	28.8667	28.6978	28.4337	28.7668	28.6475	29.0889	28.8538	28.8828	28.8149	28.7923	28.6167	28.5802	28.6553						20	20	20	NaN	NaN	NaN	NaN	0	NaN	13620000000	554	0.600239	0.918791	0.0481547	0.523514	0.0767825	0.685494	0.93791	-0.00923538	-0.0818915	0.282586	-0.135833	-1.20368	0.104323	0.221851	1.98191	P50247	P50247	Adenosylhomocysteinase
		20.7012	20.6291	20.0059	20.4853	20.4735	20.4625	20.0633	20.3798	21.0352	21.2764	19.6522	20.3797	20.1976	20.3405						2	2	2	NaN	NaN	NaN	NaN	0	NaN	43406000	27	0.744194	0.38993	0.62927	0.468845	0.149433	0.783422	0.511286	0.309814	0.706753	0.684282	-0.199222	-0.431198	0.76457	0.0388412	0.316277	P50295	P50295	Arylamine N-acetyltransferase 2
		24.367	24.4488	24.3086	24.0532	24.3537	24.2408	24.3108	24.8953	24.2347	24.4947	24.262	23.6206	24.0102	24.1902						15	11	11	NaN	NaN	NaN	NaN	0	NaN	641960000	196	0.0956555	0.553328	0.0600621	0.0962952	0.354042	2.04466	0.557551	-0.11972	-0.628028	0.780071	-0.0360519	-0.294694	0.0743079	0.509814	2.24967	P50396	P50396	Rab GDP dissociation inhibitor alpha
		23.0535	23.1261	23.0544	22.8675	23.2666	22.9225	23.5278	23.0229	22.9172	22.9472	22.8439	23.2919	23.2481	23.1293						7	7	7	NaN	NaN	NaN	NaN	0	NaN	293070000	64	0.648064	0.0276961	0.391277	0.0501898	-0.197781	-2.56746	0.141994	-0.282187	-1.74192	0.141659	0.122572	1.74375	0.82628	-0.0381657	-0.231258	P50431	P50431	Serine hydroxymethyltransferase, cytosolic
		23.2055	23.389	23.0544	23.6814	23.4191	23.2495	23.6293	23.4641	23.2901	23.2031	23.4156	23.4875	23.9566	23.3715						9	9	9	NaN	NaN	NaN	NaN	0	NaN	346490000	87	0.590774	0.142984	0.44256	0.26803	-0.272597	-1.2458	0.250204	-0.137585	-1.30031	0.866614	0.0296585	0.176786	0.392091	-0.16467	-0.936322	P50516;P50516-2	P50516;P50516-2	V-type proton ATPase catalytic subunit A
		22.5184	22.5801	22.3232	22.0663	22.0547	22.4385	22.2543	23.0818	22.4841	22.9697	22.1621	22.4674	22.4693	22.0689						1	1	1	NaN	NaN	NaN	NaN	0	NaN	185920000	79	0.907245	0.839214	0.456581	0.843187	0.0367649	0.208337	0.814268	0.0813125	0.24763	0.517385	-0.166624	-0.696108	0.687022	0.122076	0.427176	P50543	P50543	Protein S100-A11
		24.9468	24.5842	24.4902	24.9361	24.8269	24.7027	24.7644	25.113	24.3974	24.4912	24.9148	25.0452	24.9825	24.834						10	10	10	NaN	NaN	NaN	NaN	0	NaN	849890000	154	0.877272	0.0842497	0.314796	0.21042	-0.214617	-1.43625	0.202763	-0.250599	-1.46519	0.506438	0.138174	0.715278	0.431291	-0.102192	-0.855618	P50544	P50544	Very long-chain specific acyl-CoA dehydrogenase, mitochondrial
		26.9187	27.118	26.8062	26.7035	26.9562	26.9311	26.8564	27.0837	26.9903	27.0784	26.8756	26.7891	27.0148	26.9408						14	14	14	NaN	NaN	NaN	NaN	0	NaN	3780700000	394	0.714007	0.870529	0.352377	0.821397	-0.0282745	-0.237904	0.754428	0.024605	0.33049	0.450667	-0.094834	-0.817804	0.617545	0.0419545	0.531941	P50580;P50580-2	P50580;P50580-2	Proliferation-associated protein 2G4
		26.3152	26.2219	26.0478	26.4015	26.1246	25.963	26.2854	26.3	25.998	26.0519	26.0163	26.4045	26.7523	26.4445						13	13	13	71	71	71	NaN	0	NaN	2394400000	308	0.397304	0.0513885	0.00409938	0.0754902	-0.287155	-2.23709	0.182781	-0.146176	-1.54596	0.0558944	0.224558	2.47922	0.0386206	-0.365537	-2.78614	P51150	P51150	Ras-related protein Rab-7a
		25.9949	25.4615	25.7967	26.148	25.8144	25.6111	26.0339	25.9505	25.8961	25.8194	26.0726	26.0597	26.2242	25.9973						10	10	10	NaN	NaN	NaN	NaN	0	NaN	1903900000	168	0.181748	0.530815	0.484144	0.243646	-0.243448	-1.32126	0.568277	0.0768714	0.610395	0.688732	-0.0790801	-0.42467	0.107152	-0.241239	-1.96099	P51174	P51174	Long-chain specific acyl-CoA dehydrogenase, mitochondrial
		26.0253	26.1176	25.5595	25.849	25.9092	25.4299	25.9906	26.1592	25.5328	26.4344	25.6396	25.8588	26.4124	25.8685						6	6	6	NaN	NaN	NaN	NaN	0	NaN	1905100000	178	0.681657	0.71984	0.610866	0.485944	-0.1587	-0.751961	0.99175	-0.00327508	-0.0108665	0.948541	0.0189149	0.0678411	0.500306	-0.17434	-0.726142	P51410	P51410	60S ribosomal protein L9
		24.7771	24.4654	24.321	24.7073	24.8519	24.7157	24.8809	24.7358	24.7539	24.3556	24.6353	25.1342	24.9015	25.1047						7	7	7	NaN	NaN	NaN	NaN	0	NaN	866620000	145	0.167362	0.00378348	0.212312	0.0185354	-0.479093	-3.43499	0.109178	-0.214452	-1.94636	0.933915	-0.013912	-0.0871765	0.0239019	-0.250728	-3.20349	P51660	P51660	Peroxisomal multifunctional enzyme type 2;(3R)-hydroxyacyl-CoA dehydrogenase;Enoyl-CoA hydratase 2
		20.3275	20.8918	20.1214	18.8713	21.202	20.8364	21.5345	19.3964	17.8939	20.9115	20.1871	20.9649	18.9922	20.9671						3	3	3	NaN	NaN	NaN	NaN	0	NaN	42410000	26	0.509313	0.286702	0.970631	0.746497	-0.255067	-0.341662	0.304686	-1.07815	-1.14329	0.687865	0.388842	0.42594	0.603108	0.434244	0.554526	P51855	P51855	Glutathione synthetase
		27.1033	27.0339	27.5447	26.4372	27.5669	27.7131	27.3123	27.9768	27.4363	27.2396	27.2687	26.8598	27.304	26.7876						19	18	18	NaN	NaN	NaN	NaN	0	NaN	5147000000	388	0.307162	0.253427	0.0215948	0.884633	0.0459978	0.152664	0.115561	-0.327413	-1.90204	0.34609	-0.285062	-1.03977	0.0269914	0.658473	3.09547	P51859	P51859	Hepatoma-derived growth factor
		21.3435	21.0523	20.96	22.0851	21.1861	21.5918	22.0417	21.951	21.8137	21.8841	21.6905	22.3993	22.4488	21.9938						3	3	3	NaN	NaN	NaN	NaN	NaN	NaN	102610000	8	0.0287786	0.0730884	0.712534	0.0365928	-0.920415	-2.8319	0.678526	0.103451	0.439676	0.212992	-0.435876	-1.42676	0.0733163	-0.58799	-2.26039	P51863	P51863	V-type proton ATPase subunit d 1
		21.6737	21.5246	21.0893	21.6907	21.5544	21.5375	21.3181	21.7014	21.5162	21.3161	21.2691	21.1387	21.4253	20.9891						4	4	4	NaN	NaN	NaN	NaN	0	NaN	85289000	20	0.0652094	0.609723	0.364452	0.176877	0.310191	1.57147	0.214019	-0.160717	-1.423	0.505062	0.127418	0.717708	0.0603563	0.34349	2.41679	P52332	P52332	Tyrosine-protein kinase JAK1
		20.8018	19.7998	19.6443	19.4664	19.3702	19.7709	20.2233	19.8124	19.432	19.4408	19.9452	19.581	20.2173	19.5417						2	2	2	NaN	NaN	NaN	NaN	NaN	NaN	27624000	8	0.491276	0.993601	0.527745	0.725466	0.14805	0.371532	0.486146	-0.188204	-0.751594	0.436831	0.322069	0.844678	0.960984	0.014185	0.0514168	P52431	P52431	DNA polymerase delta catalytic subunit
		30.1563	30.087	30.1101	29.7615	30.3045	30.0085	30.286	30.4642	29.9801	29.9425	29.9781	30.0858	29.876	29.9971						37	37	5	NaN	NaN	NaN	NaN	0	NaN	35116000000	1796	0.0629367	0.105322	0.211738	0.7344	0.0424336	0.358797	0.0449653	-0.298922	-2.65849	0.589341	0.0618199	0.576366	0.072175	0.279536	2.27291	P52480;P53657	P52480	Pyruvate kinase PKM
		20.5797	17.6501	22.1812	21.4028	21.1843	22.5755	22.1022	19.1038	19.3741	18.9316	21.941	21.7909	21.6477	22.1447						2	2	2	NaN	NaN	NaN	NaN	0	NaN	95145000	15	0.885557	0.175955	0.569002	0.285648	-1.40765	-1.19507	0.37895	-1.15923	-0.964813	0.802854	0.371205	0.263261	0.529665	-0.619629	-0.67493	P52503	P52503	NADH dehydrogenase [ubiquinone] iron-sulfur protein 6, mitochondrial
		21.4741	21.1402	19.9783	20.9804	21.0093	21.2621	21.0788	18.2195	20.8105	20.9006	18.4472	20.5886	19.0786	20.953						2	2	2	NaN	NaN	NaN	NaN	NaN	NaN	38152000	5	0.43124	0.729515	0.612185	0.313479	0.686525	1.12033	0.768083	-0.339668	-0.31137	0.326196	0.840457	1.0881	0.857754	0.185736	0.188692	P52633	P52633	Signal transducer and transcription activator 6
		21.4069	22.3105	21.9579	21.4868	21.6589	21.7256	22.3632	21.655	22.7558	22.9277	21.84	21.7503	22.1869	21.8501						4	4	4	37	37	37	NaN	0	NaN	119480000	35	0.102449	0.352381	0.179507	0.634289	-0.138566	-0.506125	0.117469	0.657167	1.88927	0.115837	-0.717323	-1.90018	0.74825	-0.0784098	-0.339188	P52760	P52760	Ribonuclease UK114
		27.1819	26.9068	26.841	27.1525	26.9311	27.0007	27.0256	27.1836	27.4805	27.2861	27.1443	26.9309	27.1115	27.0542						7	7	7	NaN	NaN	NaN	NaN	0	NaN	4163300000	177	0.0942447	0.180561	0.0882419	0.920338	-0.0116749	-0.105159	0.0480332	0.268404	2.60371	0.0818876	-0.283113	-2.17247	0.970194	0.00303411	0.0392709	P53026	P53026	60S ribosomal protein L10a
		19.4916	18.4544	20.6782	19.6017	19.2973	20.3596	20.4858	20.31	19.9309	19.833	20.8523	19.1682	20.2586	20.6143						2	2	2	NaN	NaN	NaN	NaN	0	NaN	23645000	15	0.494687	0.552254	0.357125	0.512823	-0.457209	-0.704061	0.836211	0.0922047	0.217778	0.330688	-0.648894	-1.07697	0.846442	0.0994794	0.203939	P53702	P53702	Cytochrome c-type heme lyase
		24.5119	24.5431	24.5222	24.2706	24.8088	24.6038	24.4712	25.2807	24.3544	24.4144	24.7234	24.0515	24.1697	24.3828						7	7	7	NaN	NaN	NaN	NaN	0	NaN	741630000	174	0.055572	0.639349	0.0346859	0.0657964	0.26062	2.3471	0.258805	-0.293715	-1.27358	0.783143	-0.0354557	-0.290437	0.047007	0.58979	2.6216	P53810;P53811	P53810	Phosphatidylinositol transfer protein alpha isoform
		21.7997	21.1598	22.013	22.4892	22.0048	22.5317	21.9236	22.2848	22.1311	22.5234	22.5757	22.0001	22.5536	22.2376						2	2	2	NaN	NaN	NaN	NaN	0	NaN	137980000	22	0.156909	0.562144	0.277251	0.31024	-0.398315	-1.12873	0.317841	0.223824	1.10915	0.177168	-0.544635	-1.57019	0.729623	-0.0775046	-0.365598	P53986	P53986	Monocarboxylate transporter 1
		25.2013	24.9973	24.8549	25.3416	25.0898	25.1115	25.2902	25.4979	25.1593	25.0886	25.2321	25.1674	25.5744	25.3315						7	7	7	NaN	NaN	NaN	NaN	0	NaN	1125700000	230	0.409799	0.116515	0.810204	0.169326	-0.259017	-1.60534	0.49036	-0.0873543	-0.743965	0.662465	-0.0612267	-0.463526	0.493483	-0.110436	-0.738341	P53994;P59279	P53994;P59279	Ras-related protein Rab-2A;Ras-related protein Rab-2B
		24.9255	25.1879	25.8032	24.5879	25.1967	25.4637	25.0108	25.4609	25.2378	25.1992	25.0202	24.6748	25.0393	24.9742						6	6	1	NaN	NaN	NaN	NaN	0	NaN	1045300000	121	0.325019	0.909163	0.263022	0.502131	0.230015	0.722898	0.399753	-0.130627	-0.920064	0.935502	-0.0263009	-0.0850764	0.0610375	0.386943	2.4077	P53996-2;P53996-3	P53996-2;P53996-3	Cellular nucleic acid-binding protein
		26.3992	26.0026	26.3365	26.3008	26.3115	26.3468	26.4873	26.6333	26.3743	26.3212	26.7321	26.2114	26.4801	26.3797						14	14	13	NaN	NaN	NaN	NaN	0	NaN	2654600000	286	0.504288	0.563711	0.132447	0.465324	-0.0973005	-0.790004	0.831211	0.0311184	0.224559	0.209536	-0.216058	-1.43954	0.457268	0.0876389	0.805202	P54071	P54071	Isocitrate dehydrogenase [NADP], mitochondrial
		21.1674	21.2663	21.44	20.1871	20.9928	21.1466	18.5261	20.9989	20.7647	20.7664	20.8763	21.3394	21.3193	20.2436						5	5	5	NaN	NaN	NaN	NaN	0	NaN	57532000	13	0.706112	0.543357	0.401716	0.919625	0.047785	0.106104	0.627189	0.386349	0.517023	0.553032	0.21275	0.635522	0.524225	-0.551315	-0.68427	P54103	P54103	DnaJ homolog subfamily C member 2;DnaJ homolog subfamily C member 2, N-terminally processed
		23.0416	23.9958	24.5021	23.66	24.083	24.3321	24.3751	24.224	24.4107	24.0956	24.2687	24.1874	24.4009	23.9842						5	5	5	NaN	NaN	NaN	NaN	0	NaN	531190000	80	0.335928	0.26198	0.212596	0.346312	-0.390933	-1.03924	0.966515	0.00478204	0.0441216	0.270728	-0.458469	-1.23784	0.641559	0.0627546	0.495035	P54227;P55821;REV__Q9WTN3-4;REV__Q9WTN3-2;REV__Q9WTN3-3;REV__Q9WTN3;O70166;P63042	P54227	Stathmin
		20.69	20.2634	20.0164	20.8525	20.1935	20.6209	20.4753	20.9449	20.9147	20.6616	17.7424	20.7058	20.9628	20.5196						4	4	4	NaN	NaN	NaN	NaN	0	NaN	47924000	13	0.584922	0.320871	0.368883	0.325643	-0.273808	-1.08948	0.408608	-0.785714	-0.901578	0.473621	0.682695	0.774551	0.460931	-0.170789	-0.798268	P54276	P54276	DNA mismatch repair protein Msh6
		22.9638	23.0979	23.3903	23.1901	23.8188	22.9398	22.9184	23.3708	23.9869	22.5231	23.2775	22.9946	22.751	22.1634						8	6	6	NaN	NaN	NaN	NaN	0	NaN	306410000	54	0.312449	0.407972	0.17017	0.0734167	0.524201	2.25929	0.999021	0.000559966	0.00128982	0.79341	-0.101982	-0.276251	0.112741	0.625623	1.9213	P54726	P54726	UV excision repair protein RAD23 homolog A
		25.6977	25.5621	25.7177	25.6474	25.6722	25.5864	25.4822	25.5783	25.8206	25.5323	25.3674	25.4555	24.8315	25.382						10	10	8	NaN	NaN	NaN	NaN	0	NaN	1562400000	164	0.0605775	0.0888364	0.216866	0.0511468	0.433222	2.55191	0.959968	-0.00632874	-0.052757	0.514822	0.0827791	0.70057	0.0913488	0.356772	2.08612	P54728	P54728	UV excision repair protein RAD23 homolog B
		21.7167	20.4017	21.1482	19.2542	21.5808	21.3965	21.4972	21.325	18.6242	20.7313	20.7782	21.2561	21.2396	20.96						7	7	7	NaN	NaN	NaN	NaN	0	NaN	67163000	27	0.334707	0.0537369	0.748238	0.448321	-0.521688	-0.822317	0.0655588	-1.4053	-2.35002	0.528691	0.585639	0.676596	0.0355059	0.297971	2.85761	P54729	P54729	NEDD8 ultimate buster 1
		23.7932	24.6008	24.5722	23.4945	24.1207	24.5272	23.416	23.2568	24.2628	24.4799	24.5824	24.2665	23.4024	23.921						9	9	9	NaN	NaN	NaN	NaN	0	NaN	549780000	51	0.515169	0.150504	0.594103	0.548034	0.251899	0.643858	0.152023	0.611562	1.68897	0.380069	-0.326544	-0.962356	0.938923	-0.0331186	-0.0805526	P54775	P54775	26S protease regulatory subunit 6B
		26.0505	25.9553	25.9055	25.6286	25.9114	25.9663	26.2569	26.3679	26.0464	26.1185	25.9935	25.9022	26.2346	25.8146						12	12	12	NaN	NaN	NaN	NaN	0	NaN	2107700000	225	0.900567	0.306926	0.157376	0.543015	-0.0988035	-0.652278	0.611449	-0.0728405	-0.541439	0.19225	-0.167814	-1.50667	0.440119	0.141851	0.838233	P54822	P54822	Adenylosuccinate lyase
		24.8432	24.8797	24.8346	24.857	24.8192	24.8832	24.8412	24.9282	24.8841	24.9866	24.904	24.6802	24.7711	24.8338						9	9	9	NaN	NaN	NaN	NaN	0	NaN	872760000	125	0.539365	0.0467143	0.00908132	0.0653163	0.091928	2.353	0.201524	0.0569588	1.46996	0.0558191	-0.071273	-2.48032	0.0729823	0.106242	2.26403	P54823	P54823	Probable ATP-dependent RNA helicase DDX6
		23.1549	23.1942	22.6731	22.6882	23.0826	22.6916	22.9029	23.0927	22.5801	21.9754	22.3247	23.4563	18.394	23.3111						3	3	3	NaN	NaN	NaN	NaN	0	NaN	236750000	23	0.218677	0.741801	0.686464	0.428629	1.20717	0.860913	0.0168752	-0.649033	-3.52244	0.0364791	0.634205	2.83455	0.42157	1.222	0.87508	P54923	P54923	[Protein ADP-ribosylarginine] hydrolase
		24.4804	24.6658	24.8197	24.7846	24.3977	25.0821	24.6619	25.0542	24.458	24.7112	25.0006	24.2809	25.1191	24.7019						12	12	12	NaN	NaN	NaN	NaN	0	NaN	843230000	161	0.850069	0.742756	0.686999	0.955399	-0.013038	-0.0587863	0.760222	-0.0756958	-0.322362	0.831757	-0.0356719	-0.223817	0.740596	0.0983297	0.350005	P55194	P55194	SH3 domain-binding protein 1
		24.1933	22.3125	20.1077	28.3271	18.3461	25.6404	19.2023	20.3225	24.4858	27.4309	25.5208	18.3049	18.6018	27.8298						1	1	1	NaN	NaN	NaN	NaN	NaN	NaN	1367700000	10	0.494818	0.106052	0.732888	0.546007	2.15634	0.647252	0.0627192	4.93466	2.38572	0.38552	-2.07732	-0.950472	0.838037	-0.701001	-0.215304	P55200-2;P55200	P55200-2;P55200	Histone-lysine N-methyltransferase 2A;MLL cleavage product N320;MLL cleavage product C180
		24.7312	24.8931	24.8494	24.6527	24.6301	25.0277	25.2148	24.53	24.8493	25.0167	25.0411	24.7753	24.7756	25.0865						7	6	5	NaN	30	NaN	NaN	0	NaN	880540000	110	0.361978	0.993562	0.497919	0.409526	-0.0975226	-0.89968	0.576582	0.11838	0.596885	0.0716507	-0.187431	-2.27874	0.897693	-0.0284723	-0.135246	P55258	P55258	Ras-related protein Rab-8A
		26.9946	27.1258	27.2399	26.5514	27.0805	26.8867	27.3474	27.1187	26.7378	26.4409	26.5845	26.6255	25.7741	26.4042						11	11	11	NaN	NaN	NaN	NaN	0	NaN	3686900000	211	0.00254666	0.69038	0.174812	0.0510712	0.710027	2.55313	0.0111898	-0.520623	-3.91931	0.0981199	0.390245	2.02993	0.0174932	0.840405	3.48878	P55264;P55264-2	P55264;P55264-2	Adenosine kinase
		17.6845	19.753	20.8252	19.5687	20.7706	20.4161	20.9718	20.3186	18.7915	19.2652	20.7018	21.1524	20.6171	20.9459						2	2	2	NaN	NaN	NaN	NaN	0	NaN	40606000	20	0.667738	0.0242446	0.869791	0.12394	-1.44726	-1.84754	0.100293	-1.03311	-2.01276	0.893328	-0.128323	-0.141062	0.25537	-0.285832	-1.28415	P55302	P55302	Alpha-2-macroglobulin receptor-associated protein
		25.9445	25.8111	25.8918	26.9583	26.5963	25.9314	25.7057	25.4529	26.1535	25.8868	26.2718	26.2118	25.9724	26.9932						3	3	3	NaN	NaN	NaN	NaN	0	NaN	2235600000	109	0.427417	0.976441	0.335241	0.582854	-0.241093	-0.586764	0.576357	0.182396	0.59725	0.892635	0.0473901	0.141986	0.279302	-0.47088	-1.21301	P56135	P56135	ATP synthase subunit f, mitochondrial
		22.3791	21.8799	22.0302	21.3076	21.7836	21.778	21.195	21.3634	22.1246	21.1529	21.9179	22.7341	22.3835	21.6072						5	5	5	NaN	NaN	NaN	NaN	0	NaN	116740000	22	0.292149	0.975793	0.102702	0.413223	-0.342426	-0.89207	0.53567	0.201786	0.664695	0.663031	0.167393	0.462681	0.0832681	-0.711604	-2.15923	P56183-2;P56183-3;P56183	P56183-2;P56183-3;P56183	Ribosomal RNA processing protein 1 homolog A
		22.6392	23.3192	23.0295	22.3669	21.3386	22.879	24.2086	24.0716	23.1926	24.0827	23.123	22.2999	24.1197	22.6382						6	6	5	NaN	NaN	NaN	NaN	0	NaN	278330000	52	0.607194	0.954938	0.473692	0.746979	-0.180561	-0.340982	0.697432	0.341636	0.411963	0.140636	-0.627379	-1.74937	0.913073	0.105183	0.114798	P56212;P56212-2	P56212;P56212-2	cAMP-regulated phosphoprotein 19
		24.9471	25.0911	25.0807	24.5454	24.6762	25.0195	25.2322	25.6834	24.8461	24.9778	24.8742	24.7963	24.9421	24.989						5	5	5	NaN	NaN	NaN	NaN	0	NaN	1021000000	125	0.402015	0.365782	0.463122	0.96695	0.00691779	0.0435481	0.35991	-0.253457	-1.00756	0.918368	0.0166955	0.107771	0.381435	0.243679	0.959366	P56376	P56376	Acylphosphatase-1
		21.3056	18.8526	20.9223	22.8515	20.9817	20.993	22.3991	20.0948	21.7299	19.2471	21.7355	21.8628	21.1732	22.8062						1	1	1	NaN	NaN	NaN	NaN	NaN	NaN	118070000	29	0.598016	0.46084	0.524911	0.401238	-0.964398	-0.916941	0.821038	-0.212976	-0.238393	0.949986	0.0788418	0.0659329	0.28197	-0.830263	-1.20542	P56379	P56379	6.8 kDa mitochondrial proteolipid
		24.5834	25.3193	24.5405	25.5561	24.5879	24.0278	24.9136	24.1327	24.9603	25.4699	25.2565	24.9095	25.0658	25.3811						2	2	2	NaN	NaN	NaN	NaN	NaN	NaN	927820000	32	0.0531491	0.100333	0.290911	0.730113	-0.118987	-0.364899	0.0308531	0.813351	2.9785	0.517165	-0.229042	-0.696489	0.0478202	-0.703296	-2.60739	P56382	P56382	ATP synthase subunit epsilon, mitochondrial
		24.9514	24.8247	25.7288	25.3957	24.9653	25.5815	25.1981	25.9224	25.3471	25.3871	25.5945	25.2592	26.1747	25.4491						6	6	6	NaN	NaN	NaN	NaN	0	NaN	1440400000	115	0.33802	0.391605	0.987443	0.288411	-0.402501	-1.18737	0.92345	0.0260477	0.101034	0.430679	-0.21771	-0.856832	0.56432	-0.210838	-0.616874	P56391	P56391	Cytochrome c oxidase subunit 6B1
		26.2137	25.947	26.2851	26.4499	25.7003	26.3206	25.7911	25.9141	26.3225	25.3149	26.4742	25.9564	26.3807	26.2942						4	4	4	41	41	41	NaN	0	NaN	2255700000	119	0.81413	0.633979	0.250913	0.937927	0.0134732	0.0818695	0.771537	0.105696	0.306555	0.594527	0.186697	0.568103	0.21169	-0.27892	-1.43155	P56395	P56395	Cytochrome b5
		25.1818	25.4617	24.9721	24.877	25.2191	25.044	25.3029	25.3673	25.1985	25.2334	25.1149	25.1765	25.1979	25.0266						16	16	16	NaN	NaN	NaN	NaN	0	NaN	1133500000	279	0.828591	0.65071	0.404522	0.950072	-0.010519	-0.06582	0.586639	-0.0510594	-0.580688	0.720529	-0.0591081	-0.378599	0.339133	0.0996485	1.0564	P56399	P56399	Ubiquitin carboxyl-terminal hydrolase 5
		30.8052	30.7038	30.6984	31.4854	30.76	30.8458	30.7322	31.0312	30.9013	30.5977	31.0309	31.1146	31.454	31.1801						23	23	23	NaN	NaN	NaN	NaN	0	NaN	66115000000	4179	0.260946	0.369019	0.106613	0.231872	-0.326367	-1.36022	0.994396	0.000987689	0.00738107	0.760475	0.0798844	0.322006	0.0182301	-0.407239	-3.45038	P56480	P56480	ATP synthase subunit beta, mitochondrial
		18.9432	20.1856	19.6166	19.4984	20.1705	18.635	20.193	19.8028	20.963	19.3849	17.4332	19.5859	20.3354	19.7206						1	1	1	NaN	NaN	NaN	NaN	NaN	NaN	18017000	8	0.908646	0.510229	0.648197	0.412693	-0.319675	-0.893158	0.665218	-0.440002	-0.459417	0.753431	0.300613	0.331892	0.719485	-0.180286	-0.380095	P56671	P56671	Myc-associated zinc finger protein
		24.4736	23.269	21.9854	25.1205	24.0434	23.8161	21.8541	23.7337	22.6677	22.8197	23.7047	23.5722	21.935	24.4244						1	1	1	NaN	NaN	NaN	NaN	NaN	NaN	554050000	15	0.577597	0.878188	0.633843	0.71041	0.401571	0.393154	0.669782	-0.297764	-0.452624	0.485987	0.648092	0.751883	0.954595	0.0512419	0.0598478	P56716	P56716	Oxygen-regulated protein 1
		23.2505	23.6086	23.9311	23.318	24.0189	24.0968	24.0722	23.9786	24.2088	24.177	23.9286	23.9425	23.7889	23.8505						5	5	5	NaN	NaN	NaN	NaN	0	NaN	493530000	134	0.0807602	0.0904653	0.00401194	0.135732	-0.333581	-1.77692	0.46812	0.0631792	0.784776	0.0332889	-0.577742	-2.91286	0.0139054	0.180981	3.70649	P56812	P56812	Programmed cell death protein 5
		26.8823	26.971	27.1317	26.5604	26.7473	27.0857	26.8028	27.3941	27.3686	27.0235	27.1257	26.6055	27.5037	26.9309						8	8	8	16	16	16	NaN	0	NaN	4037800000	187	0.392269	0.99534	0.411032	0.647958	-0.127032	-0.485334	0.437103	0.165144	0.844142	0.145452	-0.28626	-1.72325	0.984039	-0.00591628	-0.0210243	P56959	P56959	RNA-binding protein FUS
		23.0094	22.8636	22.3013	22.5402	22.9328	22.8217	22.4712	23.191	22.3996	21.9474	22.3999	22.8722	22.9517	22.5996						7	7	7	NaN	NaN	NaN	NaN	0	NaN	200040000	21	0.144984	0.0457358	0.231826	0.562993	-0.129209	-0.619054	0.0385065	-0.605234	-2.78864	0.116919	0.429666	1.89293	0.824038	0.0463591	0.234308	P56960	P56960	Exosome component 10
		20.8513	19.9829	19.9193	20.8847	20.3861	18.9933	20.0847	19.8943	18.1086	18.7485	19.9735	20.7785	20.0574	19.7938						2	2	2	4	4	4	NaN	0	NaN	35337000	6	0.150182	0.546685	0.0259595	0.637895	0.199632	0.500617	0.182414	-0.896085	-1.54752	0.0458726	1.46601	2.64187	0.430236	-0.370296	-0.857713	P57716	P57716	Nicastrin
		20.2199	20.0265	19.1423	19.8652	19.8023	19.9676	20.0913	19.7872	19.7026	20.2069	19.1999	19.7744	20.2618	20.0964						1	1	1	NaN	NaN	NaN	NaN	0	NaN	21328000	12	0.957528	0.327834	0.555944	0.480679	-0.230706	-0.761561	0.454505	-0.208983	-0.810461	0.77732	0.110325	0.298512	0.410796	-0.132049	-0.897059	P57746	P57746	V-type proton ATPase subunit D
		23.8087	24.2291	24.4464	24.5333	23.8857	23.9788	24.7935	24.0609	24.5364	24.6447	24.7345	24.6808	24.2894	24.576						8	8	8	NaN	NaN	NaN	NaN	0	NaN	661930000	116	0.0541138	0.571896	0.886193	0.278798	-0.261038	-1.21445	0.126373	0.458834	1.83243	0.109039	-0.384161	-1.94735	0.260296	-0.335711	-1.26903	P57759	P57759	Endoplasmic reticulum resident protein 29
		27.5406	27.5787	27.9882	27.7815	27.6827	27.8303	27.5976	28.1689	27.9601	27.7735	27.8533	27.7231	27.82	27.77						14	14	2	NaN	NaN	NaN	NaN	0	NaN	6966700000	431	0.656853	0.868966	0.365397	0.710898	-0.0488035	-0.39245	0.796148	0.0424134	0.27248	0.331304	-0.140061	-1.07546	0.759086	0.0488437	0.323953	P57776;P57776-3	P57776;P57776-3	Elongation factor 1-delta
		23.7934	24.2161	24.1769	23.801	23.9508	23.8148	23.2355	24.1827	23.5387	23.8321	24.0351	23.5121	24.3173	23.8198						13	1	1	NaN	NaN	NaN	NaN	0	NaN	460880000	43	0.769948	0.661671	0.449998	0.654314	0.113801	0.475747	0.982949	0.00600433	0.0224611	0.333799	0.194904	1.06934	0.78929	-0.087108	-0.281936	P57776-2	P57776-2	Elongation factor 1-delta
		27.59	27.7021	27.5648	27.2806	27.4897	27.4834	27.5533	28.0226	27.3286	27.5448	27.5171	26.9662	27.3059	27.2761						49	33	32	NaN	NaN	NaN	NaN	0	NaN	5899800000	683	0.0345976	0.575805	0.104598	0.05341	0.351603	2.51638	0.336046	-0.173758	-1.06387	0.581713	0.0708626	0.588599	0.0511084	0.454498	2.55253	P57780	P57780	Alpha-actinin-4
		26.3269	26.3718	26.2377	26.5707	26.2992	26.2575	26.3085	25.9387	26.3898	26.2034	26.0793	26.4541	25.9336	26.3062						9	9	9	NaN	NaN	NaN	NaN	0	NaN	2361100000	289	0.556094	0.350072	0.383523	0.388369	0.145437	0.944314	0.864157	0.0231849	0.180086	0.232635	0.152603	1.35764	0.862367	-0.0303508	-0.18249	P57784	P57784	U2 small nuclear ribonucleoprotein A
		22.4822	21.8169	22.8221	22.9596	22.3139	22.4429	23.1611	18.7909	22.543	22.5381	22.5798	23.2522	23.1005	23.2967						5	5	5	NaN	NaN	NaN	NaN	0	NaN	198180000	23	0.219028	0.745987	0.237772	0.071798	-0.69625	-2.2771	0.483831	0.876407	0.755804	0.916185	-0.0334104	-0.110668	0.2421	-1.53925	-1.32627	P58021	P58021	Transmembrane 9 superfamily member 2
		21.499	21.9546	22.1831	21.8783	21.0053	19.091	22.6476	21.7158	22.2529	21.3355	21.7422	19.2039	21.3776	19.0036						2	2	2	NaN	NaN	NaN	NaN	0	NaN	85094000	25	0.258214	0.0483653	0.332408	0.0279092	2.01704	3.06604	0.503642	0.661962	0.72022	0.729518	0.101888	0.365746	0.30441	1.25319	1.14402	P58044	P58044	Isopentenyl-diphosphate Delta-isomerase 1
		21.0278	21.0701	20.0786	20.7728	21.0067	20.6628	20.2951	21.1948	20.4964	20.6664	20.2296	21.3872	21.0118	20.489						1	1	1	NaN	NaN	NaN	NaN	NaN	NaN	52977000	12	0.821261	0.28188	0.327136	0.545758	-0.225317	-0.64767	0.261817	-0.32572	-1.26441	0.391335	0.273205	0.937941	0.612606	-0.172802	-0.539631	P58059	P58059	28S ribosomal protein S21, mitochondrial
		29.3833	29.4266	29.4066	28.9243	29.1621	29.2099	29.4954	29.5262	29.6229	29.5858	29.3781	29.1651	29.3447	28.9944						35	35	34	NaN	NaN	NaN	NaN	0	NaN	20578000000	1108	0.768778	0.280573	0.0709967	0.511844	0.117107	0.705775	0.219521	0.180534	1.40314	0.179628	-0.243766	-1.55947	0.254642	0.180338	1.28641	P58252	P58252	Elongation factor 2
		22.3534	20.8724	19.8837	21.209	21.4572	20.5609	20.4015	20.4168	18.8378	18.4651	21.0541	21.4119	20.9136	21.197						3	3	3	5	5	5	NaN	0	NaN	58426000	6	0.254359	0.294483	0.0545117	0.883781	-0.0945217	-0.153801	0.149709	-1.25674	-1.70087	0.132301	1.62728	1.7968	0.207812	-0.465058	-1.44599	P58281;P58281-2	P58281;P58281-2	Dynamin-like 120 kDa protein, mitochondrial;Dynamin-like 120 kDa protein, form S1
		24.8145	25.3651	24.5548	24.5785	25.2047	24.8422	24.9321	23.9271	25.4959	25.0832	24.7002	24.8707	23.7777	24.9499						7	7	7	NaN	NaN	NaN	NaN	0	NaN	935860000	101	0.898395	0.292661	0.417773	0.479607	0.295505	0.763526	0.379416	0.366575	0.963789	0.409347	-0.264848	-0.900049	0.68849	0.193778	0.425024	P58389	P58389	Serine/threonine-protein phosphatase 2A activator
		21.9056	22.1183	22.1097	21.7639	21.9823	21.8039	21.8872	22.1362	21.2652	21.5451	21.6505	23.0118	18.4056	22.1539						4	4	4	NaN	NaN	NaN	NaN	0	NaN	127770000	16	0.320211	0.818033	0.822871	0.538391	0.783918	0.660081	0.0149381	-0.465441	-3.63779	0.0175171	0.487427	3.48751	0.548972	0.761932	0.642289	P58462-4;P58462;P58462-3;P58462-2;P58462-5	P58462-4;P58462;P58462-3;P58462-2;P58462-5	Forkhead box protein P1
		18.9433	19.0577	17.6279	18.4038	19.6351	18.6166	19.0376	18.7844	19.1346	18.558	18.5957	19.1022	18.8356	19.9868						1	1	1	NaN	NaN	NaN	NaN	NaN	NaN	7624300	7	0.364021	0.0933499	0.952233	0.158878	-0.799993	-1.65476	0.442156	-0.25565	-0.83426	0.567524	-0.254593	-0.611625	0.493955	-0.28975	-0.737494	P58742	P58742	Aladin
		23.854	23.4025	23.4608	23.9382	23.4414	23.166	23.472	23.5265	23.974	23.7308	23.4501	23.5345	23.3546	23.6626						6	6	6	21	21	21	NaN	0	NaN	352510000	71	0.490176	0.0724274	0.801539	0.445435	0.146626	0.827892	0.101943	0.316843	1.99998	0.800707	-0.0544395	-0.266209	0.382647	-0.115778	-0.956718	P59017	P59017	Bcl-2-like protein 13
		21.1377	20.9484	20.8055	19.3245	21.4362	21.1702	20.8474	21.1926	18.252	20.7146	21.0217	21.1313	20.9169	20.6478						3	3	3	NaN	NaN	NaN	NaN	0	NaN	57285000	16	0.384207	0.131125	0.750351	0.525514	-0.344646	-0.682051	0.17953	-1.1655	-1.5599	0.555175	0.557941	0.631963	0.213993	0.262917	1.42309	P59114	P59114	Phosphorylated CTD-interacting factor 1
		24.6514	24.4071	24.8312	24.4286	24.8361	24.6077	24.7489	24.9852	24.2862	24.4841	24.47	24.7083	24.6876	24.6067						9	9	9	NaN	NaN	NaN	NaN	0	NaN	806720000	103	0.101376	0.0163304	0.814146	0.50196	-0.0879553	-0.723203	0.0166033	-0.381042	-3.53769	0.258132	0.166149	1.27564	0.247992	0.126937	1.30731	P59325	P59325	Eukaryotic translation initiation factor 5
		24.3804	24.3949	24.625	24.3638	24.4599	24.5224	24.1953	24.7949	24.3912	24.6163	24.1397	24.6453	24.7438	24.4826						4	4	4	NaN	NaN	NaN	NaN	0	NaN	711390000	53	0.737493	0.227485	0.386965	0.117682	-0.182857	-1.88787	0.576997	-0.110687	-0.596213	0.6851	0.0586233	0.429997	0.448003	-0.130793	-0.82293	P59708	P59708	Splicing factor 3B subunit 6
		21.5189	21.2831	21.6145	21.2466	21.114	21.5014	22.2069	21.8639	21.5688	21.2947	20.9714	21.3629	22.0762	21.3704						4	4	4	NaN	NaN	NaN	NaN	0	NaN	102760000	12	0.60497	0.165621	0.861332	0.442016	-0.187359	-0.834532	0.265075	-0.393276	-1.2546	0.477446	0.137513	0.767495	0.849096	0.0684045	0.200357	P59729	P59729	Ras and Rab interactor 3
		20.6939	18.4919	19.6821	20.7924	17.612	20.0712	20.1999	21.3265	19.2172	19.7339	19.8526	20.0413	19.6263	20.3219						1	1	1	1	1	1	NaN	NaN	NaN	26445000	13	0.91893	0.856959	0.667373	0.906228	-0.0814088	-0.123891	0.839062	-0.201154	-0.213916	0.652369	0.313826	0.478675	0.844792	-0.194081	-0.206168	P59997	P59997	Lysine-specific demethylase 2A
		28.33	28.4203	28.1605	28.2934	28.3059	28.0773	28.431	28.1128	28.3601	28.0676	28.1434	28.1622	28.3778	28.2481						7	7	7	NaN	NaN	NaN	NaN	0	NaN	9456100000	360	0.601909	0.908849	0.361058	0.661913	0.0383387	0.464351	0.749879	-0.0413748	-0.336892	0.30634	0.110679	1.13893	0.792539	-0.0309658	-0.277452	P59999	P59999	Actin-related protein 2/3 complex subunit 4
		26.8716	26.9092	26.7437	26.9413	26.8771	26.8137	26.881	26.7653	26.6471	26.8467	26.7357	26.9339	27.028	26.9598						18	18	18	NaN	NaN	NaN	NaN	0	NaN	3632400000	555	0.844617	0.0728337	0.00888125	0.115039	-0.107462	-1.90556	0.17925	-0.0911355	-1.56111	0.140542	0.123298	1.74989	0.0179444	-0.139624	-3.46506	P60122	P60122	RuvB-like 1
		25.4809	25.7047	25.1529	25.4875	25.3802	25.4335	25.3151	25.6803	25.6722	25.7057	25.275	25.5393	25.4908	25.5291						15	15	15	NaN	NaN	NaN	NaN	0	NaN	1336000000	162	0.440074	0.877075	0.896038	0.659613	-0.0632291	-0.467794	0.537813	0.098721	0.661059	0.617372	-0.0944734	-0.532209	0.510073	-0.0674767	-0.708881	P60229	P60229	Eukaryotic translation initiation factor 3 subunit E
		27.8563	27.9516	28.2279	27.4409	27.9594	27.9965	28.0897	28.5741	27.7365	27.6841	27.7572	27.9234	28.1744	27.7884						11	11	8	NaN	NaN	NaN	NaN	0	NaN	7892400000	562	0.247575	0.0793531	0.859801	0.683465	-0.0929228	-0.432399	0.0524206	-0.428977	-2.53171	0.493103	0.143228	0.739024	0.364099	0.192827	0.997995	P60335;P57724	P60335	Poly(rC)-binding protein 1
		19.1715	20.2428	19.0723	20.1909	20.8405	20.0228	20.2086	18.1708	18.5192	19.9611	20.1009	19.5714	19.1642	20.9905						2	2	2	NaN	NaN	NaN	NaN	NaN	NaN	25061000	4	0.965437	0.631398	0.81445	0.704575	-0.239304	-0.40159	0.737419	-0.283627	-0.354509	0.811191	0.142353	0.251836	0.909712	-0.0980307	-0.119261	P60487	P60487	Pyridoxal phosphate phosphatase
		24.8711	24.6472	24.7656	24.4198	24.7718	24.5842	24.6855	25.8026	25.2657	23.7824	24.8037	25.0365	24.9061	24.4993						5	5	5	NaN	NaN	NaN	NaN	0	NaN	1211200000	94	0.70464	0.365831	0.870152	0.471577	-0.138034	-0.77834	0.51966	-0.343759	-0.692159	0.884644	0.0586402	0.152649	0.700777	0.147086	0.4071	P60670;P60670-2	P60670;P60670-2	Nuclear protein localization protein 4 homolog
		34.7167	34.8856	34.683	34.2839	34.7397	34.6394	34.8699	35.0847	34.6817	34.4319	34.6089	34.8565	34.7386	34.3812						29	29	1	NaN	NaN	NaN	NaN	0	NaN	890900000000	10581	0.319928	0.233821	0.655948	0.935126	-0.0164661	-0.0855739	0.101846	-0.259259	-2.00072	0.693355	0.0681388	0.417908	0.338321	0.174654	1.05836	P60710	P60710	Actin, cytoplasmic 1;Actin, cytoplasmic 1, N-terminally processed
		26.7792	26.9053	26.5852	26.3157	26.4784	26.3025	26.7581	26.6525	27.2334	27.0073	26.4988	26.2244	26.6705	26.6337						8	7	2	NaN	NaN	NaN	NaN	0	NaN	3051100000	236	0.449941	0.141944	0.318304	0.510717	0.136823	0.70775	0.153015	0.365288	1.68393	0.311107	-0.266823	-1.12647	0.828739	0.0383584	0.227916	P60766	P60766	Cell division control protein 42 homolog
		23.7393	23.7264	23.6166	23.3545	23.9387	23.7675	23.1744	24.4134	24.266	23.3159	23.7376	23.9152	23.9083	23.9142						3	3	3	NaN	NaN	NaN	NaN	0	NaN	439040000	49	0.535826	0.372826	0.853251	0.0349289	-0.30333	-2.87161	0.899852	-0.0503268	-0.132373	0.545615	-0.163951	-0.647909	0.780484	-0.0890514	-0.294122	P60824	P60824	Cold-inducible RNA-binding protein
		22.0881	19.7203	22.7627	22.2153	22.0193	22.6507	22.5997	22.4078	22.5897	22.5834	22.1483	22.1961	22.4965	22.4505						3	2	2	NaN	NaN	NaN	NaN	0	NaN	170500000	19	0.414681	0.36715	0.36764	0.432569	-0.684405	-0.853084	0.923457	0.0211118	0.101024	0.399347	-0.743878	-0.920918	0.845277	0.0383606	0.205512	P60840-2;P60840;P60840-3	P60840-2;P60840	Alpha-endosulfine
		27.8171	27.4152	27.3849	27.0496	27.5225	27.4918	27.615	25.7673	27.5818	27.5713	27.884	27.4245	27.1475	27.7351						19	16	9	NaN	NaN	NaN	NaN	0	NaN	5599600000	299	0.327881	0.344727	0.901036	0.938354	-0.0190177	-0.081305	0.326387	0.579865	1.08762	0.256286	-0.262312	-1.28132	0.563917	-0.33657	-0.617536	P60843	P60843	Eukaryotic initiation factor 4A-I
		27.0313	26.8791	27.1952	26.7933	27.0629	27.1395	27.2705	27.2739	27.3084	26.6356	27.0529	27.0247	27.1394	27.003						4	4	4	NaN	NaN	NaN	NaN	0	NaN	4286700000	159	0.617465	0.186161	0.470634	0.496291	-0.0810033	-0.733307	0.33275	-0.187724	-1.07191	0.90561	-0.024268	-0.124713	0.123372	0.130988	1.85111	P60867	P60867	40S ribosomal protein S20
		18.9018	20.4589	19.3398	19.7063	20.0513	19.6748	19.3511	18.849	18.1488	20.9802	19.0402	20.1075	19.4755	19.4742						1	1	1	NaN	NaN	NaN	NaN	0	NaN	16698000	11	0.993078	0.895594	0.644043	0.852116	-0.084036	-0.196284	0.908737	-0.091807	-0.120556	0.801791	0.211974	0.26472	0.584219	-0.204203	-0.584569	P60904	P60904	DnaJ homolog subfamily C member 5
		22.5178	22.594	22.4774	23.1687	22.4793	22.5017	22.3691	22.8276	22.6881	22.433	22.4293	22.6303	23.1489	22.5951						5	3	3	NaN	NaN	NaN	NaN	0	NaN	195990000	53	0.795099	0.805771	0.163218	0.691885	-0.102008	-0.420055	0.848154	-0.0276322	-0.201628	0.436287	0.172654	0.845747	0.250138	-0.247029	-1.30051	P61021	P61021	Ras-related protein Rab-5B
		21.067	20.3616	21.2274	21.771	20.3054	20.9179	20.7757	21.4904	21.015	20.8361	20.8142	20.9988	21.268	20.9721						1	1	1	NaN	NaN	NaN	NaN	NaN	NaN	64866000	31	0.981223	0.823563	0.375589	0.94168	0.0271227	0.0769068	0.958533	0.0160483	0.0546505	0.557721	0.218325	0.627746	0.519643	-0.20725	-0.692188	P61022	P61022	Calcineurin B homologous protein 1
		24.72	24.8968	24.7839	24.9512	24.8432	25.2181	24.7833	24.9554	24.5072	24.8581	25.0483	25.0187	25.5411	24.8001						9	8	8	NaN	34	34	NaN	0	NaN	950440000	126	0.612669	0.154416	0.454164	0.206157	-0.281938	-1.45224	0.443198	-0.145442	-0.832233	0.828305	0.0334609	0.228505	0.467616	-0.169957	-0.785715	P61027;Q9DD03	P61027	Ras-related protein Rab-10
		23.3907	23.4881	23.7158	23.7759	23.7003	24.0937	23.5822	23.2165	24.2237	24.4163	23.8497	23.7139	23.9545	23.6813						5	3	3	28	NaN	NaN	NaN	0	26	436020000	102	0.0334329	0.376658	0.159213	0.202608	-0.190602	-1.46578	0.0995263	0.515033	2.01877	0.0230406	-0.570596	-3.23643	0.575602	-0.135039	-0.598473	P61028	P61028	Ras-related protein Rab-8B
		24.2313	24.1339	24.1076	23.7247	23.6016	23.8418	24.037	24.4114	24.3081	24.199	23.9335	23.5275	17.9396	23.7383						2	2	2	NaN	NaN	NaN	NaN	0	NaN	463380000	24	0.213133	0.206025	0.177453	0.206279	2.31424	1.45177	0.470503	0.173897	0.780335	0.572283	-0.0974649	-0.603862	0.221151	2.23781	1.39735	P62838;P61079;Q6ZWY6;P61080	P62838;P61079;Q6ZWY6;P61080	Ubiquitin-conjugating enzyme E2 D2;Ubiquitin-conjugating enzyme E2 D3;Ubiquitin-conjugating enzyme E2 D2B;Ubiquitin-conjugating enzyme E2 D1
		23.9613	23.9326	23.9815	23.6881	24.1761	23.7656	23.9974	24.4625	23.7542	23.7052	23.6523	23.8132	23.861	23.8527						6	6	6	NaN	NaN	NaN	NaN	0	NaN	463380000	86	0.0445816	0.0915608	0.721342	0.578642	0.0485528	0.593553	0.0737313	-0.39648	-2.25588	0.0779416	0.186954	2.21166	0.199118	0.258079	1.47933	P61082	P61082	NEDD8-conjugating enzyme Ubc12
		23.4695	23.9431	24.0228	23.4704	23.8185	23.8697	23.9254	24.4867	24.0943	24.0808	23.8682	23.5127	23.8407	23.5976						6	6	6	NaN	NaN	NaN	NaN	0	NaN	449190000	100	0.758599	0.916553	0.0364698	0.711732	0.0761069	0.391246	0.958375	-0.0106336	-0.054859	0.183447	-0.288007	-1.54313	0.121917	0.374747	1.86034	P61087	P61087	Ubiquitin-conjugating enzyme E2 K
		26.6356	26.5034	26.8019	26.471	26.9356	26.8224	26.8121	27.2874	26.6937	26.7044	26.6742	26.7608	26.2457	26.7418						5	5	5	NaN	NaN	NaN	NaN	0	NaN	3447900000	203	0.197046	0.158841	0.0517705	0.908122	0.0202492	0.121374	0.0925797	-0.273614	-2.07559	0.371118	-0.0877684	-0.982176	0.104848	0.381632	1.97799	P61089;Q9CQ37	P61089	Ubiquitin-conjugating enzyme E2 N
		27.5682	27.47	27.4983	27.1876	27.4377	27.3111	27.8093	27.4852	27.422	26.7854	27.2341	26.8691	27.0189	27.5005						11	11	11	34	34	34	NaN	0	NaN	5363000000	520	0.0364177	0.785979	0.731002	0.168977	0.301513	1.60694	0.131338	-0.36366	-1.80248	0.188396	0.283879	1.52243	0.118903	0.381294	1.87983	P61161	P61161	Actin-related protein 2
		24.2957	24.5397	24.0718	24.4449	24.2846	24.1334	24.1978	24.017	24.2631	24.1309	23.9394	24.3544	23.8929	24.3482						6	6	3	NaN	NaN	NaN	NaN	0	NaN	589440000	149	0.38137	0.5319	0.219117	0.463388	0.139515	0.793639	0.666937	-0.0470915	-0.456856	0.17593	0.226898	1.57564	0.791103	-0.0402912	-0.279433	P61164	P61164	Alpha-centractin
		21.4435	20.8506	20.9409	20.9246	21.2617	20.9797	21.3353	21.1976	20.7651	21.0645	20.6905	20.8671	21.246	21.3189						3	3	3	NaN	NaN	NaN	NaN	0	NaN	67534000	23	0.320506	0.0946003	0.542987	0.623311	-0.104091	-0.523005	0.0436487	-0.353595	-2.68327	0.334281	0.19991	1.06816	0.751409	0.0495936	0.334738	P61202;P61202-2	P61202;P61202-2	COP9 signalosome complex subunit 2
		26.7798	26.8192	26.1642	26.3603	26.5609	26.5642	26.7814	27.1129	26.5891	26.6009	26.6996	26.6475	26.8375	26.3466						8	8	3	NaN	NaN	NaN	NaN	0	NaN	3583800000	391	0.871514	0.397383	0.394656	0.737105	-0.0796116	-0.354955	0.460957	-0.125003	-0.798218	0.628251	-0.0989579	-0.515389	0.492081	0.14435	0.740862	P84078;P61205;Q8BSL7	P84078;P61205;Q8BSL7	ADP-ribosylation factor 1;ADP-ribosylation factor 3;ADP-ribosylation factor 2
		18.4203	20.6273	20.3847	20.9433	20.3773	20.2813	20.7812	21.1755	19.0913	20.5939	20.6146	20.6704	20.0746	20.6796						2	2	2	NaN	NaN	NaN	NaN	NaN	NaN	45654000	6	0.84248	0.278655	0.83168	0.606797	-0.380976	-0.548725	0.306611	-0.553899	-1.13822	0.994242	-0.00602913	-0.00758362	0.57011	0.178953	0.607402	P61211	P61211	ADP-ribosylation factor-like protein 1
		23.0705	23.6287	23.2728	23.0511	23.2275	23.5129	23.4357	23.5838	23.6937	23.7573	23.4761	23.0892	23.1572	23.0736						8	8	8	15	15	15	NaN	0	NaN	334610000	70	0.792988	0.232059	0.00449355	0.394176	0.149131	0.931873	0.140616	0.202356	1.74948	0.0767884	-0.386556	-2.22351	0.0162107	0.333332	3.56023	P61222	P61222	ATP-binding cassette sub-family E member 1
		23.0644	18.6007	22.3855	22.5053	22.4803	22.286	22.5618	22.9869	22.1968	19.0884	21.8531	22.5381	22.9849	22.2264						3	3	1	18	18	NaN	NaN	0	NaN	181170000	29	0.700455	0.135048	0.696225	0.475661	-0.944169	-0.770784	0.128214	-1.53263	-1.82118	0.702309	0.592863	0.404875	0.986834	-0.0044047	-0.0173422	P61226	P61226	Ras-related protein Rap-2b
		26.6763	26.6555	27.3128	27.4907	26.8185	27.244	27.2	27.0803	27.3214	27.1984	27.1627	27.4227	26.5186	27.1746						8	8	8	NaN	NaN	NaN	NaN	0	NaN	4174000000	152	0.693236	0.77988	0.519917	0.989282	-0.00480731	-0.0141176	0.290448	0.141806	1.18173	0.486882	-0.1937	-0.750259	0.859334	0.0470864	0.186567	P61255	P61255	60S ribosomal protein L26
		23.529	23.2499	23.2966	23.5777	23.143	23.0227	23.2617	23.6149	23.6271	23.2838	23.2159	23.5695	23.3269	23.3028						5	5	5	NaN	NaN	NaN	NaN	0	NaN	314630000	72	0.655505	0.497433	0.441499	0.914911	0.013529	0.112358	0.561321	0.114995	0.621805	0.804033	0.0376995	0.261643	0.443018	-0.139165	-0.832582	P61290	P61290	Proteasome activator complex subunit 3
		25.7014	25.6733	25.4077	25.5422	25.6707	25.5945	25.5769	26.1307	25.6067	25.3254	25.5295	25.8195	26.0755	25.7832						6	6	6	NaN	NaN	NaN	NaN	0	NaN	1637000000	132	0.789718	0.0241666	0.257686	0.0375231	-0.311589	-2.81057	0.192218	-0.256016	-1.5068	0.41711	0.09397	0.884124	0.426397	-0.149543	-0.865373	Q9CQL1;P61327	Q9CQL1;P61327	Protein mago nashi homolog 2;Protein mago nashi homolog
		27.8855	28.0179	27.6381	28.4028	28.0523	28.0539	27.8996	27.7193	28.013	27.7029	28.0406	28.1805	28.6417	28.3978						7	7	7	NaN	NaN	NaN	NaN	0	NaN	8295400000	272	0.140894	0.18961	0.0594112	0.113285	-0.420572	-1.91754	0.927605	-0.0124669	-0.0955291	0.761176	0.067256	0.321025	0.0224117	-0.475361	-3.26137	P61358	P61358	60S ribosomal protein L27
		25.7244	25.6634	24.7554	25.4061	25.0793	25.2042	25.2304	24.4649	24.5666	25.1458	24.8712	25.2757	25.7714	25.4998						4	4	4	38	38	38	NaN	0	NaN	1201200000	133	0.989499	0.774182	0.0214733	0.674977	-0.128299	-0.44492	0.622317	-0.133489	-0.524543	0.136968	0.526105	1.76988	0.0859123	-0.520915	-2.13451	P61514	P61514	60S ribosomal protein L37a
		24.0086	21.068	24.1291	24.9686	23.9232	24.3814	24.5148	23.8629	24.7965	24.8692	24.7389	24.4891	24.7726	25.0426						3	3	3	NaN	NaN	NaN	NaN	0	NaN	655870000	49	0.103551	0.517486	0.538106	0.282615	-1.22451	-1.2036	0.0232387	0.630965	3.22873	0.26773	-1.25797	-1.24669	0.0515021	-0.597508	-2.54622	P61620;Q9JLR1	P61620	Protein transport protein Sec61 subunit alpha isoform 1
		22.2311	22.5766	22.8482	22.5124	22.572	22.7882	22.8182	18.9745	22.7472	22.7407	22.6221	22.6713	19.7814	22.5875						6	1	1	NaN	NaN	NaN	NaN	0	NaN	164960000	23	0.969913	0.230266	0.848595	0.33513	0.861975	1.06609	0.448045	0.915148	0.82285	0.341984	-0.161284	-1.04955	0.940005	0.108111	0.0791212	P61750	P61750	ADP-ribosylation factor 4
		22.5684	23.4191	22.3116	21.8819	22.3411	22.3451	22.8794	23.5609	22.9867	22.2765	22.3286	21.9802	22.6595	22.2113						4	4	4	24	24	24	NaN	0	NaN	194880000	45	0.391894	0.919855	0.418496	0.558891	0.261562	0.625814	0.549829	-0.251013	-0.640858	0.974097	0.0146159	0.0341266	0.247409	0.497959	1.30917	P61759	P61759	Prefoldin subunit 3
		24.3011	24.504	24.5098	25.5137	24.7652	24.818	24.5394	24.573	25.055	24.7668	25.2297	24.8062	25.3166	25.0609						4	4	4	NaN	NaN	NaN	NaN	0	NaN	870340000	111	0.0910747	0.999398	0.840004	0.353062	-0.354046	-1.02339	0.0570836	0.34329	2.46207	0.406738	-0.310024	-0.905456	0.0472276	-0.387313	-2.61772	P61804	P61804	Dolichyl-diphosphooligosaccharide--protein glycosyltransferase subunit DAD1
		22.9076	23.0244	22.7198	22.8472	22.9712	22.8581	23.0518	23.3215	22.5932	22.9751	22.8948	22.9686	22.9863	22.9923						5	5	5	NaN	NaN	NaN	NaN	0	NaN	232830000	95	0.488524	0.0706878	0.93319	0.211862	-0.107692	-1.43092	0.191099	-0.229621	-1.51134	0.680369	0.0536769	0.436957	0.584553	0.0682526	0.584033	P61924	P61924	Coatomer subunit zeta-1
		27.2238	26.6592	28.393	27.3145	27.283	27.8799	28.2114	27.1672	27.355	27.4629	27.5458	27.2748	27.6731	27.6519						2	2	2	NaN	NaN	NaN	NaN	0	NaN	6081400000	165	0.933997	0.534021	0.771118	0.771238	-0.135643	-0.306972	0.568518	-0.180832	-0.61	0.900033	-0.0569345	-0.132131	0.756828	0.102124	0.32712	P61957;Q9Z172-2;Q9Z172	P61957;Q9Z172-2;Q9Z172	Small ubiquitin-related modifier 2;Small ubiquitin-related modifier 3
		22.1396	21.6891	21.7596	21.6641	21.622	21.4898	21.8953	22.5175	21.1655	22.2102	21.767	21.6947	22.3384	21.978						2	2	2	NaN	NaN	NaN	NaN	0	NaN	116450000	41	0.956386	0.453881	0.611715	0.392082	-0.190619	-0.936342	0.671028	-0.166923	-0.450774	0.742944	0.0988601	0.346681	0.710521	-0.122556	-0.392993	P61961	P61961	Ubiquitin-fold modifier 1
		24.3828	24.3269	24.3346	24.378	24.2965	24.4731	24.513	24.7369	24.38	24.3173	24.1681	24.2729	24.7675	24.3786						7	7	7	32	32	32	NaN	0	NaN	677310000	148	0.582462	0.0856828	0.843611	0.397498	-0.117423	-0.924824	0.129461	-0.216419	-1.81366	0.278987	0.0671369	1.21391	0.854692	0.0318588	0.192814	P61965	P61965	WD repeat-containing protein 5
		24.0914	24.5429	24.0055	23.7279	24.4878	23.8193	24.0014	24.3146	24.7537	24.4587	23.886	24.0834	23.775	24.1631						4	4	4	NaN	NaN	NaN	NaN	0	NaN	551790000	52	0.731885	0.520946	0.262987	0.719865	0.0847551	0.379551	0.483155	0.210364	0.757038	0.391356	-0.274223	-0.937896	0.498874	0.148614	0.728694	P61971	P61971	Nuclear transport factor 2
		29.4036	29.2263	29.4745	29.2196	29.4698	29.4196	29.2241	29.6926	29.4362	29.2877	29.4298	29.4256	29.5984	29.3826						22	22	22	NaN	NaN	NaN	NaN	0	NaN	21735000000	1261	0.65328	0.195617	0.817489	0.201436	-0.137837	-1.47031	0.603381	-0.0669986	-0.554096	0.560624	-0.0535448	-0.622954	0.896657	-0.0172935	-0.136627	P61979;P61979-2;P61979-3	P61979;P61979-2;P61979-3	Heterogeneous nuclear ribonucleoprotein K
		22.953	22.4841	22.9099	22.6794	22.8398	23.0844	22.8242	23.2502	23.0318	23.1744	23.0782	22.6976	22.9299	23.0305						3	3	3	NaN	NaN	NaN	NaN	0	NaN	227560000	45	0.284173	0.625637	0.0459895	0.436144	-0.129425	-0.846027	0.48549	0.0951324	0.752785	0.0523561	-0.338225	-2.53272	0.473649	0.113668	0.774501	P62071;P10833	P62071;P10833	Ras-related protein R-Ras2;Ras-related protein R-Ras
		19.1028	19.1336	20.8822	19.1022	19.6618	20.5439	19.4409	21.3608	20.3402	20.0229	20.4463	18.6482	19.9057	19.6639						2	2	2	NaN	NaN	NaN	NaN	0	NaN	26133000	5	0.874815	0.94609	0.0836901	0.817821	0.149241	0.24278	0.974369	0.017935	0.0337682	0.238586	-0.714584	-1.33778	0.22553	0.845891	1.38199	P62077	P62077	Mitochondrial import inner membrane translocase subunit Tim8 B
		27.2658	27.3673	27.1469	27.847	27.1625	26.8511	26.7841	26.2955	27.4865	27.2402	27.2245	27.3537	26.9366	27.6503						10	10	10	NaN	NaN	NaN	NaN	0	NaN	4463400000	226	0.209862	0.0538378	0.0904883	0.725613	0.0931856	0.37132	0.0593705	0.543766	2.43014	0.664944	0.0896665	0.459826	0.105598	-0.540247	-1.97241	P62082	P62082	40S ribosomal protein S7
		23.9872	23.5285	23.439	24.117	23.5374	23.2426	22.9306	23.3651	23.3253	23.4512	23.2133	23.5709	23.8435	23.2047						11	3	3	NaN	NaN	NaN	NaN	0	NaN	348360000	39	0.588092	0.216268	0.0391945	0.405257	0.228237	0.908537	0.721926	0.0609894	0.376596	0.0868369	0.437994	2.12605	0.266528	-0.270747	-1.25026	P62141	P62141	Serine/threonine-protein phosphatase PP1-beta catalytic subunit
		24.9164	25.0761	24.9511	24.895	25.2077	24.9657	24.6915	25.2265	24.6633	24.6578	24.85	25.2445	25.4442	24.8276						6	6	6	NaN	NaN	NaN	NaN	0	NaN	1038000000	155	0.707064	0.0665342	0.116304	0.239955	-0.212452	-1.33328	0.116018	-0.299097	-1.89896	0.0212968	0.235928	3.30759	0.513511	-0.149283	-0.702858	P62192	P62192	26S protease regulatory subunit 4
		25.1429	25.1772	24.9593	24.9413	25.1431	25.1939	24.8805	25.2936	25.4141	25.2127	24.9626	25.204	25.3159	24.9492						14	14	14	NaN	NaN	NaN	NaN	0	NaN	1242100000	181	0.393349	0.80184	0.567081	0.423052	-0.101189	-0.87209	0.668262	0.0687073	0.454883	0.329957	-0.141313	-1.07878	0.844381	-0.028583	-0.206723	P62196	P62196	26S protease regulatory subunit 8
		29.316	29.8487	30.0053	28.9955	29.7616	29.7416	30.03	30.0513	29.8495	29.6585	29.5339	29.525	29.7166	29.5173						11	11	11	NaN	NaN	NaN	NaN	0	NaN	27741000000	838	0.593026	0.313496	0.176828	0.879856	-0.0449289	-0.159048	0.145934	-0.215523	-1.72068	0.648787	-0.139224	-0.484079	0.0407134	0.309817	2.74162	P62204;Q9D6P8;P20801	P62204	Calmodulin
		28.2631	28.2555	27.6435	28.2683	28.2669	27.8905	28.065	28.7136	28.1273	28.0898	27.5711	28.198	28.7224	28.053						11	11	11	NaN	NaN	NaN	NaN	0	NaN	8951000000	579	0.811905	0.204055	0.471743	0.42515	-0.216868	-0.867872	0.290921	-0.304644	-1.18043	0.485502	0.178222	0.752764	0.751384	-0.0904463	-0.334772	P62242	P62242	40S ribosomal protein S8
		26.6745	26.5925	25.9475	26.2376	26.3882	26.116	26.3118	25.7887	26.4859	26.1121	25.9945	26.4009	26.1833	26.1964						5	5	5	NaN	NaN	NaN	NaN	0	NaN	2411800000	145	0.848805	0.524532	0.36389	0.640748	0.102811	0.496269	0.826785	0.0463401	0.230571	0.511128	0.165522	0.707029	0.546805	-0.109051	-0.645915	P62245	P62245	40S ribosomal protein S15a
		27.2933	27.4825	27.9041	27.0418	27.4788	27.5694	27.6671	27.9731	27.8647	27.7422	27.5231	27.2921	27.4632	27.2458						17	14	14	NaN	NaN	NaN	NaN	0	NaN	6022100000	452	0.831449	0.865322	0.0446566	0.681423	0.0967471	0.435404	0.81312	0.0379119	0.249198	0.280051	-0.279552	-1.21087	0.0585851	0.338388	2.44095	P62259	P62259	14-3-3 protein epsilon
		26.8741	27.039	27.6154	26.6391	27.1732	27.4018	27.3353	28.0116	26.8699	26.3076	27.275	27.2326	28.1376	26.9043						7	7	7	NaN	NaN	NaN	NaN	0	NaN	5025400000	272	0.593417	0.0694902	0.746571	0.376533	-0.382908	-0.970141	0.0927427	-0.662995	-2.0742	0.538513	0.224413	0.659875	0.888432	0.0556746	0.147592	P62264	P62264	40S ribosomal protein S14
		26.8138	27.076	26.5393	26.4454	26.7482	26.6364	27.1029	25.6493	26.2557	26.3969	26.5002	26.5942	26.3424	26.6179						8	8	8	NaN	NaN	NaN	NaN	0	NaN	3016300000	109	0.41925	0.82033	0.461722	0.325668	0.200458	1.08942	0.704325	-0.149944	-0.401953	0.120235	0.334384	1.87115	0.967633	0.0160187	0.0426474	P62267	P62267	40S ribosomal protein S23
		28.4382	28.4134	28.4866	28.9466	28.2412	28.4272	28.3233	28.7061	28.5424	28.4686	28.439	28.4428	28.7968	28.6245						11	11	11	NaN	NaN	NaN	NaN	0	NaN	11733000000	483	0.616746	0.817974	0.207222	0.782122	-0.0501796	-0.29185	0.651276	0.0588832	0.480323	0.586818	0.0878539	0.580401	0.238695	-0.196917	-1.33742	P62270	P62270	40S ribosomal protein S18
		24.9074	18.557	22.6856	24.0728	23.4009	23.0755	18.0291	18.564	19.4772	18.9921	23.166	22.9911	19.8722	18.8758						1	1	1	NaN	NaN	NaN	NaN	0	NaN	193600000	11	0.453501	0.486834	0.53236	0.360508	1.976	1.00619	0.916735	-0.222271	-0.109937	0.360734	2.01058	1.00567	0.928408	0.187685	0.0944663	P62274	P62274	40S ribosomal protein S29
		27.221	27.4229	26.8775	26.4749	26.9566	27.1245	27.2059	27.2754	27.4281	27.1845	26.7251	26.6742	27.6135	26.8023						11	11	11	NaN	NaN	NaN	NaN	0	NaN	4321800000	182	0.99434	0.821411	0.584666	0.932601	-0.0309326	-0.0889152	0.888768	-0.0280474	-0.147144	0.721126	-0.113464	-0.377743	0.687299	0.110578	0.426769	P62281	P62281	40S ribosomal protein S11
		27.5465	27.3312	27.4041	28.1608	27.5704	27.4722	27.4685	27.6763	26.9484	27.439	27.4479	27.5968	27.6265	27.6						7	7	7	NaN	NaN	NaN	NaN	0	NaN	5919600000	191	0.337073	0.449883	0.174649	0.990278	0.00286198	0.0128063	0.133211	-0.268448	-1.79148	0.261525	0.332241	1.26529	0.347084	-0.0609317	-1.03742	P62301	P62301	40S ribosomal protein S13
		25.439	25.3656	24.8903	25.3549	24.8735	24.9205	25.2248	25.5334	25.4565	25.8009	25.335	25.16	25.8481	25.0426						2	2	2	25	25	25	NaN	0	NaN	1247000000	187	0.182661	0.392351	0.87039	0.746795	-0.0878045	-0.34124	0.127927	0.392773	1.82293	0.214472	-0.26838	-1.42135	0.478907	-0.212198	-0.76481	P62305	P62305	Small nuclear ribonucleoprotein E
		24.7768	24.8565	25.3981	24.9348	25.1316	25.2099	24.8696	26.1499	25.3375	25.2566	25.079	24.9957	26.2218	24.9966						5	5	5	43	43	43	NaN	0	NaN	1255700000	133	0.570912	0.296554	0.746855	0.325922	-0.413159	-1.08879	0.744849	-0.115864	-0.343989	0.24487	-0.232836	-1.31731	0.897481	-0.0644588	-0.135528	P62307	P62307	Small nuclear ribonucleoprotein F
		23.0333	24.2322	24.2173	24.2154	24.0338	24.009	23.9861	23.9351	24.7654	24.8875	24.176	24.2799	24.5098	23.9283						3	3	3	NaN	NaN	NaN	NaN	0	NaN	578460000	52	0.0513479	0.575817	0.324958	0.444023	-0.314766	-0.830629	0.0206496	0.618666	3.3357	0.144754	-0.685093	-1.72698	0.144373	-0.248339	-1.72903	P62309	P62309	Small nuclear ribonucleoprotein G
		24.9245	25.2983	25.0227	24.5792	25.4203	25.059	25.0167	25.7373	25.1752	25.2612	24.545	25.0457	25.7899	24.5148						2	2	2	NaN	NaN	NaN	NaN	0	NaN	1099000000	81	0.739327	0.280614	0.621581	0.67062	-0.16061	-0.45138	0.304972	-0.314533	-1.14254	0.889803	-0.0376046	-0.145763	0.625478	0.191528	0.519661	P62311	P62311	U6 snRNA-associated Sm-like protein LSm3
		25.0924	25.5004	25.1384	25.0958	25.0648	25.3601	25.752	24.2959	25.5705	25.8907	25.1692	25.1612	24.7877	25.1788						5	5	5	NaN	NaN	NaN	NaN	0	NaN	1145300000	77	0.560812	0.245013	0.3644	0.346314	0.164174	1.03924	0.34092	0.425275	1.0521	0.169548	-0.336744	-1.60432	0.850002	0.0756424	0.199135	P62313	P62313	U6 snRNA-associated Sm-like protein LSm6
		26.4855	26.4143	26.0093	27.3122	26.7094	26.4632	26.6223	26.9007	26.5747	26.652	26.6043	26.8221	26.9749	26.7297						5	5	5	NaN	NaN	NaN	NaN	0	NaN	3231500000	117	0.533677	0.352608	0.750307	0.422668	-0.28695	-0.872864	0.586687	-0.0635832	-0.580611	0.871772	-0.0550052	-0.169869	0.230467	-0.168361	-1.365	P62315	P62315	Small nuclear ribonucleoprotein Sm D1
		27.531	27.803	27.7393	27.8724	27.7231	27.6272	27.7304	27.5032	27.6889	27.7367	27.7029	27.7471	27.7954	27.7114						8	8	8	61	61	61	NaN	0	NaN	6683300000	565	0.492528	0.548826	0.256981	0.874769	-0.0148487	-0.165854	0.365928	0.0635056	0.993849	0.771801	0.0269394	0.306188	0.171573	-0.105294	-1.59511	P62317	P62317	Small nuclear ribonucleoprotein Sm D2
		27.4953	27.6287	27.6047	27.7608	27.8467	27.5298	27.699	27.8945	27.6585	27.7065	27.6546	27.7098	28.0397	27.7996						5	5	5	NaN	NaN	NaN	NaN	0	NaN	6625400000	299	0.296618	0.0696716	0.702575	0.0818408	-0.227345	-2.17292	0.512313	-0.0692789	-0.704954	0.47591	-0.0508278	-0.770325	0.43859	-0.107239	-0.841226	P62320	P62320	Small nuclear ribonucleoprotein Sm D3
		18.3807	19.7214	19.3067	19.7261	21.8577	20.4483	20.9249	20.7336	24.2979	19.7262	20.1642	18.7204	19.1338	20.0026						1	1	1	NaN	NaN	NaN	NaN	0	NaN	54617000	14	0.771266	0.917991	0.0186996	0.99703	-0.00191752	-0.00391148	0.762858	0.404977	0.318671	0.158413	-2.11241	-1.65704	0.0163048	1.70551	3.55477	P62322	P62322	U6 snRNA-associated Sm-like protein LSm5
		22.7839	21.7626	21.8203	22.5032	22.2089	22.0124	21.7884	22.0184	21.929	21.6273	21.7911	22.2145	22.4358	22.24						2	2	2	NaN	NaN	NaN	NaN	0	NaN	139390000	38	0.668614	0.552885	0.0524977	0.805239	-0.0792519	-0.259988	0.132829	-0.224569	-1.79371	0.216832	0.435045	1.41279	0.0566114	-0.289728	-2.46883	P62331	P62331	ADP-ribosylation factor 6
		24.6493	24.7207	24.4726	24.3124	24.5841	24.5763	24.4897	24.5729	24.3859	24.7734	24.3363	24.563	24.5036	24.4658						9	9	9	NaN	NaN	NaN	NaN	0	NaN	718930000	113	0.611523	0.855943	0.977425	0.81138	0.02794	0.251578	0.6497	-0.0572154	-0.482701	0.80984	0.0402214	0.253685	0.259049	0.044934	1.27283	P62334	P62334	26S protease regulatory subunit 10B
		18.1394	18.9497	21.6657	22.218	21.786	21.7556	21.9477	17.3885	22.0882	22.043	22.0593	22.3975	22.7998	22.6087						1	1	1	NaN	NaN	NaN	NaN	0	NaN	112220000	25	0.0631914	0.579017	0.972656	0.103916	-2.35877	-1.98497	0.35353	1.34406	1.0223	0.184924	-1.82027	-1.53689	0.212646	-1.88256	-1.42803	P62342	P62342	Selenoprotein T
		21.729	21.7049	22.2416	21.6768	21.9606	21.7785	21.6192	19.1357	21.3746	21.7054	20.0294	21.525	18.8739	21.6612						3	3	3	NaN	NaN	NaN	NaN	0	NaN	87743000	31	0.321063	0.364033	0.764755	0.197851	1.15135	1.4843	0.926522	-0.0870137	-0.0969634	0.140186	0.80157	1.75186	0.706272	0.436798	0.399133	P62488	P62488	DNA-directed RNA polymerase II subunit RPB7
		27.3185	27.1732	27.1625	27.1437	27.4535	27.2914	27.5134	27.1469	27.497	27.1537	27.2944	27.6294	26.0011	27.0568						12	12	12	NaN	NaN	NaN	NaN	0	NaN	5108400000	288	0.439073	0.665684	0.205634	0.483795	0.303712	0.75587	0.789259	-0.0362525	-0.281978	0.282245	-0.115562	-1.20465	0.317971	0.455527	1.10882	P62702	P62702	40S ribosomal protein S4, X isoform
		26.155	26.2277	26.0475	25.8962	26.2543	26.0057	26.4556	26.1619	26.088	26.0525	25.8597	25.9313	26.3722	25.8824						9	9	9	NaN	NaN	NaN	NaN	0	NaN	2171900000	183	0.260498	0.313301	0.712617	0.904579	0.0196319	0.126083	0.142352	-0.219309	-1.73996	0.468118	0.0815094	0.784779	0.400237	0.157432	0.919045	P62717	P62717	60S ribosomal protein L18a
		25.5231	25.4941	25.5335	25.2969	25.3188	25.7426	25.5466	25.6291	25.5492	25.4489	25.5813	25.4897	25.684	25.5111						9	9	9	NaN	NaN	NaN	NaN	0	NaN	1457000000	182	0.641076	0.328617	0.664071	0.286344	-0.0996896	-1.19312	0.77979	-0.0328199	-0.295084	0.421671	-0.0645588	-0.874875	0.985123	-0.00231091	-0.0195964	P62748;P84075;Q91X97	P62748;P84075	Hippocalcin-like protein 1;Neuron-specific calcium-binding protein hippocalcin
		27.7468	28.2556	28.0934	28.4792	28.1522	28.4315	28.0772	28.2718	28.4642	28.2543	28.313	28.1375	28.6236	28.1344						9	9	9	NaN	NaN	NaN	NaN	0	NaN	9734400000	341	0.314723	0.803595	0.602731	0.52658	-0.154748	-0.680219	0.34175	0.110624	1.05011	0.339971	-0.200052	-1.05438	0.706636	-0.0653192	-0.398606	P62751	P62751	60S ribosomal protein L23a
		27.437	27.3908	27.2737	27.5247	27.4336	27.3814	27.4129	28.3726	27.5085	27.4644	27.2887	27.4254	28.3606	27.3644						8	8	8	NaN	NaN	NaN	NaN	0	NaN	5996600000	414	0.844619	0.20991	0.898043	0.313125	-0.310275	-1.12125	0.465536	-0.229545	-0.789607	0.873577	-0.0139902	-0.167451	0.871667	-0.0667396	-0.17001	P62754	P62754	40S ribosomal protein S6
		24.5903	24.6917	25.6883	24.1859	24.8815	25.245	25.1019	25.7237	25.673	25.3295	25.3576	24.7215	24.8705	24.7936						4	4	4	NaN	NaN	NaN	NaN	0	NaN	1159200000	83	0.628468	0.909774	0.0316743	0.987753	-0.0061175	-0.0161323	0.392602	0.215323	0.93523	0.148027	-0.664324	-1.70964	0.0933456	0.442884	2.06911	P62774	P62774	Myotrophin
		35.2369	35.5698	35.6707	36.002	35.9991	35.9548	35.5555	35.4684	35.3572	35.5418	35.7691	36.1273	35.8945	36.4483						19	19	19	NaN	NaN	NaN	NaN	0	NaN	1756000000000	11361	0.268654	0.0496587	0.14066	0.0666583	-0.536836	-2.33664	0.364575	-0.188404	-0.996915	0.774957	0.0637906	0.301796	0.106037	-0.412222	-1.96916	P62806	P62806	Histone H4
		24.5649	24.296	24.1326	24.564	24.307	24.0942	24.3217	24.4691	24.5801	23.7096	24.1933	24.2034	24.0746	24.3255						10	10	10	NaN	NaN	NaN	NaN	0	NaN	621400000	109	0.254211	0.798045	0.635038	0.236039	0.188151	1.34623	0.57665	-0.137032	-0.596775	0.394845	0.228384	0.93045	0.417535	0.0967983	0.883259	P62814	P62814	V-type proton ATPase subunit B, brain isoform
		23.5547	23.2017	22.6226	23.5916	22.9649	22.7614	23.0532	21.319	23.0372	22.9695	23.1909	23.3817	22.0347	23.2149						9	4	4	NaN	NaN	NaN	NaN	0	NaN	265580000	67	0.79443	0.161385	0.438805	0.446993	0.365587	0.82488	0.314371	0.541235	1.11804	0.543464	0.176788	0.651523	0.581007	-0.352436	-0.589737	P62821;Q8K386	P62821	Ras-related protein Rab-1A
		29.2443	29.3613	29.333	29.0835	29.3263	29.4217	29.4504	29.466	29.2886	29.356	29.4849	29.203	29.0257	29.3168						11	11	11	NaN	NaN	NaN	NaN	0	NaN	20030000000	585	0.363996	0.891013	0.0137491	0.503934	0.0737263	0.719704	0.543841	-0.0395486	-0.650888	0.228903	-0.120976	-1.37034	0.0326356	0.234251	2.92992	P62827;Q61820	P62827	GTP-binding nuclear protein Ran
		26.457	26.1579	25.8176	26.0077	26.3848	25.8934	26.2862	26.2321	25.2874	25.831	25.3531	26.1788	26.0361	25.9695						6	6	6	50	50	50	NaN	0	NaN	2149100000	180	0.0138621	0.0407006	0.0873381	0.783969	0.0485616	0.289292	0.0138555	-0.70863	-3.70996	0.0343094	0.619534	2.88693	0.359235	0.137657	1.00911	P62830	P62830	60S ribosomal protein L23
		20.7248	20.7172	21.1498	20.2047	20.1064	20.2353	19.9389	21.2374	20.1866	20.5416	19.9818	20.5282	18.9314	19.7869						8	1	1	NaN	NaN	NaN	NaN	NaN	NaN	41267000	16	0.0901915	0.20428	0.778773	0.0877421	0.950287	2.11787	0.716809	-0.142818	-0.383938	0.143293	0.462445	1.73485	0.277992	0.630659	1.21676	P62835;P35276	P62835	Ras-related protein Rap-1A
		23.464	23.3284	23.192	24.3045	23.3926	23.4456	23.1265	24.0728	22.1483	23.6361	23.2383	23.4545	24.0736	24.0651						2	2	2	NaN	NaN	NaN	NaN	0	NaN	383320000	36	0.715162	0.258218	0.13055	0.432312	-0.292143	-0.853593	0.306933	-0.501787	-1.13737	0.288415	0.564678	1.18736	0.279148	-0.355034	-1.21345	P62843	P62843	40S ribosomal protein S15
		24.6257	24.5144	24.0283	25.0182	23.8622	23.938	23.6315	25.0109	23.3639	23.9082	23.4243	24.4616	24.8528	24.15						4	4	4	NaN	NaN	NaN	NaN	0	NaN	758800000	268	0.245877	0.559585	0.0196489	0.850553	0.0585415	0.198392	0.221887	-0.545202	-1.39475	0.0174145	0.981202	3.493	0.389995	-0.377458	-0.940814	P62849-2;P62849-3;P62849	P62849-2;P62849-3;P62849	40S ribosomal protein S24
		27.7442	27.8386	27.5774	27.8878	27.7294	27.7085	27.6927	27.0079	28.0145	27.6779	27.5268	27.6602	27.3577	27.8602						6	6	6	NaN	NaN	NaN	NaN	0	NaN	6502500000	175	0.810887	0.228658	0.694778	0.396205	0.135955	0.927562	0.432442	0.205131	0.853337	0.884107	0.0222731	0.153366	0.720154	-0.0914481	-0.379136	P62852	P62852	40S ribosomal protein S25
		27.0456	27.1945	26.7277	27.066	27.1275	26.9674	26.8967	26.4075	27.1412	26.8906	26.6976	27.1613	26.8783	26.9928						4	4	4	NaN	NaN	NaN	NaN	0	NaN	3978300000	199	0.809715	0.712389	0.32797	0.986789	-0.00236781	-0.0174019	0.78896	0.0600584	0.282391	0.562607	0.0986187	0.619689	0.448684	-0.161045	-0.821617	P62855	P62855	40S ribosomal protein S26
		25.2489	25.1605	24.6395	25.0219	24.533	25.2375	25.4569	26.1209	26.0532	25.9438	25.2078	24.4222	25.7495	25.1646						3	3	3	NaN	NaN	NaN	NaN	0	NaN	1233700000	122	0.41001	0.771874	0.130837	0.802752	-0.0944419	-0.263401	0.413592	0.397871	0.891313	0.0467743	-0.717299	-2.62571	0.673485	0.224987	0.44713	P62858	P62858	40S ribosomal protein S28
		25.3855	25.8351	24.9908	25.7568	24.7726	25.1412	25.98	25.0602	25.9922	25.725	25.144	25.6048	26.0401	25.5196						1	1	1	NaN	NaN	NaN	NaN	NaN	NaN	1391300000	66	0.210626	0.662963	0.455767	0.42771	-0.229461	-0.862748	0.351288	0.381941	1.02753	0.696425	-0.128385	-0.413431	0.209345	-0.483017	-1.44025	P62862	P62862	40S ribosomal protein S30
		24.2204	24.4276	24.8374	23.9689	24.5855	24.8643	24.6677	24.9543	23.967	24.4697	25.1844	24.0074	24.5436	24.4906						6	6	6	NaN	NaN	NaN	NaN	0	NaN	756780000	91	0.561607	0.477833	0.172131	0.952186	0.0163886	0.063028	0.498819	-0.227584	-0.72879	0.65014	-0.176825	-0.482037	0.0610955	0.420797	2.40693	P62869	P62869	Transcription elongation factor B polypeptide 2
		26.5343	26.4476	26.1554	26.2702	26.1328	26.2993	26.3284	26.2395	26.0104	26.208	25.9726	25.6573	26.5039	26.2517						13	13	9	NaN	NaN	NaN	NaN	0	NaN	2297900000	184	0.134946	0.832292	0.49164	0.4002	0.214221	0.919124	0.0664324	-0.186349	-2.33937	0.0587327	0.2882	2.43891	0.625279	0.112371	0.519967	P62874;Q61011	P62874	Guanine nucleotide-binding protein G(I)/G(S)/G(T) subunit beta-1
		22.5634	21.8538	22.5109	19.4454	21.7804	21.395	21.0907	21.4183	19.4923	19.6641	21.6711	19.6705	21.196	21.5979						2	2	2	NaN	NaN	NaN	NaN	0	NaN	87260000	13	0.131938	0.819606	0.552728	0.474107	0.771891	0.773654	0.11856	-1.14526	-1.88208	0.263891	1.31753	1.25815	0.299965	0.59962	1.15586	P62878	P62878	E3 ubiquitin-protein ligase RBX1;E3 ubiquitin-protein ligase RBX1, N-terminally processed
		25.5644	25.2215	24.928	25.1219	25.1872	25.0422	25.3033	25.2399	25.1242	25.1483	24.8267	24.9342	25.3348	25.3197						12	8	8	NaN	NaN	NaN	NaN	0	NaN	1083900000	189	0.451723	0.589393	0.436273	0.949714	0.0127301	0.0662919	0.200917	-0.160076	-1.47232	0.372923	0.17588	0.978149	0.981761	-0.00307369	-0.0240267	P62880;P29387	P62880;P29387	Guanine nucleotide-binding protein G(I)/G(S)/G(T) subunit beta-2;Guanine nucleotide-binding protein subunit beta-4
		27.6247	27.4106	27.2675	27.7615	27.6765	27.2427	27.546	27.6484	27.2096	26.954	27.2337	27.3721	27.4229	27.5324						6	6	6	NaN	NaN	NaN	NaN	0	NaN	5443600000	331	0.0364978	0.176975	0.157069	0.61128	0.0736297	0.541703	0.0361193	-0.395948	-2.84299	0.0508376	0.383641	2.5569	0.518931	0.0859373	0.693423	P62889	P62889	60S ribosomal protein L30
		24.1366	24.3289	18.6829	23.697	18.9901	23.18	18.0413	16.8499	19.412	19.5781	22.5812	18.5516	19.6897	20.1381						1	1	1	NaN	NaN	NaN	NaN	NaN	NaN	133470000	13	0.438426	0.075339	0.357538	0.104977	3.25157	1.97702	0.52495	1.25843	0.683021	0.281828	2.1876	1.20582	0.912134	-0.194467	-0.116045	P62892	P62892	60S ribosomal protein L39
		24.9268	24.3656	24.9317	24.8986	25.5951	25.5086	25.3249	25.9369	25.2562	25.2342	25.6591	24.3643	24.9806	25.3896						4	4	4	NaN	NaN	NaN	NaN	0	NaN	1193400000	117	0.831426	0.167063	0.00467809	0.679351	-0.130824	-0.438458	0.324731	-0.208201	-1.09176	0.0299624	-0.602514	-3.00397	0.0672316	0.679891	2.32976	P62897;CON__P62894	P62897	Cytochrome c, somatic
		27.1193	27.1401	26.7303	27.4848	27.4519	26.8697	26.8578	27.0549	25.9047	26.7884	26.8035	27.6407	27.285	27.2189						6	6	6	NaN	NaN	NaN	NaN	0	NaN	4204300000	169	0.43638	0.0868165	0.0276476	0.271629	-0.262889	-1.2352	0.119009	-0.559677	-1.87913	0.100677	0.619723	2.00976	0.162575	-0.322935	-1.63691	P62900	P62900	60S ribosomal protein L31
		28.9661	28.918	28.7784	28.7436	28.8661	28.942	29.0693	29.1595	28.9889	28.827	28.8712	28.6917	28.9365	28.7776						17	17	17	NaN	NaN	NaN	NaN	0	NaN	15056000000	730	0.215595	0.432888	0.0689768	0.594355	0.0496392	0.568376	0.24975	-0.113545	-1.30174	0.583001	-0.044133	-0.586526	0.087639	0.207317	2.1188	P62908	P62908	40S ribosomal protein S3
		24.9951	25.2207	25.3345	25.2608	24.7809	25.0813	25.5275	25.1474	25.2619	25.3111	25.0323	25.6516	25.8664	25.3793						4	4	4	NaN	NaN	NaN	NaN	0	NaN	1228600000	91	0.0688836	0.256172	0.0679564	0.0323478	-0.429629	-2.93756	0.743526	0.0675281	0.345859	0.99333	0.000988166	0.00878505	0.0696664	-0.498146	-2.30122	P62911	P62911	60S ribosomal protein L32
		23.9853	22.8682	22.9687	22.5948	22.5056	22.8139	23.0622	23.4692	22.8636	23.4535	22.86	22.0151	22.376	22.5872						3	3	3	NaN	NaN	NaN	NaN	0	NaN	255420000	35	0.189258	0.130176	0.249804	0.0998996	0.778145	2.01584	0.754951	0.0962987	0.329756	0.913488	0.0452266	0.114247	0.0710368	0.63662	2.28562	P62915	P62915	Transcription initiation factor IIB
		27.1539	27.3669	27.2706	27.419	27.4651	27.4897	27.7711	27.0739	27.4676	27.4534	27.3444	27.1941	27.5778	27.5128						8	8	8	NaN	NaN	NaN	NaN	0	NaN	5114100000	166	0.653477	0.423769	0.518929	0.346011	-0.125656	-1.03996	0.876846	-0.0281531	-0.163075	0.179032	-0.119189	-1.56206	0.916386	0.0216853	0.110401	P62918	P62918	60S ribosomal protein L8
		25.6277	25.8539	26.5312	25.5636	26.159	26.2099	25.9929	26.6172	26.1147	25.9508	26.2093	25.6763	26.2544	25.6464						13	13	13	NaN	NaN	NaN	NaN	0	NaN	2165400000	324	0.605491	0.576978	0.129445	0.914295	0.0350609	0.113175	0.406552	-0.153144	-0.905843	0.496354	-0.197495	-0.733194	0.15154	0.385699	1.69144	P62960;Q9Z2C8-2;Q9JKB3-2;Q9Z2C8;Q9JKB3	P62960	Nuclease-sensitive element-binding protein 1
		29.372	29.3386	29.6829	29.4468	29.7167	29.8648	29.608	29.939	29.8582	29.6928	29.5928	29.6494	29.8838	29.5321						13	13	2	NaN	NaN	NaN	NaN	0	NaN	24988000000	866	0.357606	0.0627573	0.063383	0.130133	-0.228365	-1.80964	0.563079	-0.0675089	-0.618912	0.0729355	-0.254536	-2.26454	0.481465	0.0936796	0.760124	P62983;P0CG49;P0CG50	P62983;P0CG49;P0CG50	Ubiquitin-40S ribosomal protein S27a;Ubiquitin;40S ribosomal protein S27a;Polyubiquitin-B;Ubiquitin;Polyubiquitin-C;Ubiquitin;Ubiquitin-related 1;Ubiquitin-related 2
		19.5303	18.1495	22.4409	21.8673	22.686	22.2232	21.8859	16.7841	19.6615	18.6529	21.7582	22.3543	19.7171	22.1386						12	1	1	NaN	NaN	NaN	NaN	0	NaN	96037000	9	0.987762	0.483467	0.675007	0.54114	-0.906345	-0.655437	0.649636	-0.870608	-0.482798	0.751541	0.472814	0.334551	0.786503	-0.508551	-0.285787	P62984	P62984	Ubiquitin-60S ribosomal protein L40;Ubiquitin;60S ribosomal protein L40
		27.3094	27.3705	27.0492	27.7662	27.4344	27.2969	26.7582	27.0476	26.4842	27.0952	27.0404	27.5135	26.9986	27.3645						9	9	8	NaN	NaN	NaN	NaN	0	NaN	4579600000	364	0.314688	0.795231	0.0692876	0.72246	0.0815841	0.375832	0.3265	-0.261038	-1.08734	0.0909967	0.500545	2.08916	0.500534	-0.157923	-0.725737	P62996;P62996-2	P62996	Transformer-2 protein homolog beta
		25.209	25.2765	25.3869	25.2864	24.6427	24.571	25.0575	25.3216	25.2991	25.1522	24.8286	24.796	25.9731	24.4794						9	3	3	NaN	NaN	NaN	NaN	0	NaN	1162700000	86	0.979657	0.331225	0.418544	0.61192	0.206905	0.540702	0.452862	0.195099	0.813599	0.174375	0.196413	1.58253	0.688392	-0.184607	-0.425168	P63001;P60764	P63001;P60764	Ras-related C3 botulinum toxin substrate 1;Ras-related C3 botulinum toxin substrate 3
		30.9615	31.1788	31.1531	30.8856	31.0798	31.1245	31.203	31.4968	31.3693	31.1609	31.0708	30.9792	31.4141	30.9925						34	34	24	55	55	NaN	NaN	0	NaN	72917000000	3621	0.775333	0.474832	0.230683	0.592336	-0.0838283	-0.571587	0.854718	-0.0257047	-0.192779	0.226001	-0.155553	-1.38035	0.576195	0.0974299	0.597512	P63017;Q61696;P17879	P63017	Heat shock cognate 71 kDa protein
		21.3189	22.3918	22.5983	22.4434	21.8711	22.5978	22.4714	22.1245	23.063	22.4483	22.6938	22.5471	22.2432	22.6055						2	2	2	32	32	32	NaN	0	NaN	166040000	44	0.117515	0.748731	0.443093	0.475219	-0.277192	-0.771598	0.115288	0.468825	1.90388	0.207153	-0.546912	-1.44847	0.40114	-0.199105	-0.917148	P63024;P63044	P63024;P63044	Vesicle-associated membrane protein 3;Vesicle-associated membrane protein 2
		25.9985	26.3636	26.5802	25.8506	26.4849	26.4451	26.0176	26.4407	25.8382	25.4449	26.1616	26.0633	25.6439	26.2123						5	5	5	NaN	NaN	NaN	NaN	0	NaN	2364400000	126	0.0426059	0.365779	0.977596	0.397511	0.225059	0.924795	0.0577707	-0.532122	-2.45233	0.204398	0.383285	1.45892	0.110594	0.373897	1.9363	P63028	P63028	Translationally-controlled tumor protein
		24.9696	25.1625	25.009	25.3109	24.8316	24.8513	24.588	24.9718	25.075	25.1357	24.4367	25.0575	25.7853	24.6729						8	8	8	NaN	NaN	NaN	NaN	0	NaN	1025400000	116	0.72156	0.787997	0.127818	0.846105	-0.0588791	-0.204394	0.746247	0.0717789	0.342014	0.319311	0.230565	1.10541	0.266655	-0.361223	-1.24988	P63037	P63037	DnaJ homolog subfamily A member 1
		23.0023	23.4335	23.4731	22.7148	22.8544	23.0482	22.7715	19.8169	23.1113	22.9082	23.2539	23.0095	18.8517	22.0226						2	2	2	NaN	NaN	NaN	NaN	0	NaN	229180000	30	0.540552	0.0796885	0.59992	0.14277	1.86131	1.73769	0.338761	0.968345	1.05729	0.79004	0.0648058	0.280899	0.577334	0.828158	0.595668	P63073	P63073	Eukaryotic translation initiation factor 4E
		25.6209	25.2932	25.5841	25.2382	25.5701	25.5149	25.8917	25.8382	25.4663	25.2705	25.5533	25.2245	25.378	25.5653						11	11	10	NaN	NaN	NaN	NaN	0	NaN	1552700000	182	0.131693	0.185288	0.140781	0.76561	0.0448395	0.314823	0.0924182	-0.273716	-2.07696	0.97713	0.00408522	0.0301293	0.0728543	0.31447	2.26543	P63085	P63085	Mitogen-activated protein kinase 1
		23.6411	23.5626	23.2718	23.2871	23.583	23.7504	23.4538	23.5348	23.3367	23.3159	23.2363	23.5431	23.056	23.5849						12	2	2	NaN	NaN	NaN	NaN	0	NaN	349530000	54	0.124642	0.239092	0.837343	0.809163	0.0460194	0.254612	0.0151243	-0.284193	-3.62598	0.263673	0.14435	1.25881	0.298333	0.185862	1.16024	P63087;P63087-2	P63087;P63087-2	Serine/threonine-protein phosphatase PP1-gamma catalytic subunit
		20.3365	20.7416	19.7915	20.2823	20.1989	20.6018	20.4388	20.7169	19.7469	21.2301	18.6274	19.9343	21.7703	19.5963						3	2	2	NaN	NaN	NaN	NaN	0	NaN	38747000	14	0.603984	0.434894	0.690042	0.820806	-0.145664	-0.23871	0.379551	-0.620981	-0.963494	0.559169	0.419863	0.625353	0.927605	0.0554544	0.0955299	P63094-2;P63094;Q6R0H7-4;Q6R0H7;P63094-3	P63094-2;P63094;Q6R0H7-4;Q6R0H7;P63094-3	Guanine nucleotide-binding protein G(s) subunit alpha isoforms short;Guanine nucleotide-binding protein G(s) subunit alpha isoforms XLas
		30.5581	30.9639	31.0619	30.1226	30.6908	30.8317	30.9378	31.311	31.0158	30.8344	30.7615	30.3298	30.8666	30.5363						20	20	15	NaN	NaN	NaN	NaN	0	NaN	58107000000	2049	0.617041	0.87496	0.122928	0.7427	0.0990675	0.347026	0.687493	-0.0722154	-0.426484	0.491618	-0.193966	-0.741696	0.133984	0.365249	1.78699	P63101	P63101	14-3-3 protein zeta/delta
		21.6223	21.8519	21.8936	21.6987	22.2076	21.5304	21.9805	18.533	21.4942	21.4164	21.507	21.9442	18.8717	18.7352						2	2	2	NaN	NaN	NaN	NaN	0	NaN	87799000	24	0.287429	0.129172	0.508941	0.0813015	1.91628	2.17816	0.702309	0.409687	0.404876	0.0137515	0.29409	3.71723	0.406546	1.21251	0.905855	P63139	P63139	Nuclear transcription factor Y subunit beta
		24.0409	23.8185	23.1623	23.4095	23.2424	23.5291	23.4344	23.9264	23.5352	24.027	23.4584	23.3539	23.9144	23.2829						5	5	5	NaN	NaN	NaN	NaN	0	NaN	416990000	62	0.89467	0.558177	0.827843	0.765224	0.0907097	0.315362	0.562258	0.14042	0.620264	0.822223	-0.0657126	-0.236779	0.949143	0.0160022	0.0670465	P63154	P63154	Crooked neck-like protein 1
		30.4082	30.451	31.197	30.2672	30.4936	31.0109	30.5636	30.7355	30.6158	30.5795	30.7666	30.3094	30.4308	30.3404						17	17	15	NaN	NaN	NaN	NaN	0	NaN	52672000000	1384	0.374902	0.69627	0.181481	0.416661	0.220627	0.885039	0.758328	-0.0469403	-0.325016	0.783412	-0.073101	-0.290064	0.0586361	0.340669	2.44024	P63158	P63158	High mobility group protein B1
		24.8205	24.8833	22.92	24.4373	24.38	24.5839	24.5128	25.1041	24.8712	25.0293	24.7661	24.2566	24.398	24.7963						5	5	5	NaN	NaN	NaN	NaN	0	NaN	786480000	43	0.454578	0.885487	0.215598	0.712538	-0.218372	-0.390084	0.273911	0.243697	1.22854	0.305901	-0.623622	-1.14009	0.516149	0.161552	0.698257	P63166	P63166	Small ubiquitin-related modifier 1
		25.1341	25.1816	23.2871	23.2738	24.6239	23.2582	23.3896	24.1748	24.5987	23.9837	23.6675	24.5171	23.6006	22.2147						3	3	1	NaN	NaN	NaN	NaN	0	NaN	549620000	49	0.577746	0.338642	0.775604	0.404389	0.775038	0.910346	0.641135	0.221692	0.49568	0.849729	0.135845	0.199503	0.565606	0.417502	0.614765	P63168	P63168	Dynein light chain 1, cytoplasmic
		22.7104	22.8409	23.3556	23.3554	22.8892	23.503	22.9938	23.0445	22.7462	23.4359	22.805	22.9922	23.7545	23.184						3	3	3	NaN	NaN	NaN	NaN	0	NaN	289590000	70	0.727092	0.405891	0.478226	0.418014	-0.24467	-0.882285	0.666683	-0.111904	-0.457233	0.807981	0.0698597	0.25623	0.454371	-0.202625	-0.810716	P63213	P63213	Guanine nucleotide-binding protein G(I)/G(S)/G(O) subunit gamma-2
		26.404	26.6085	26.8816	25.8809	26.5891	26.5219	26.6179	27.0076	26.531	25.7888	26.3098	26.1598	26.7411	26.2758						10	10	10	NaN	NaN	NaN	NaN	0	NaN	2746400000	204	0.183633	0.264088	0.877893	0.866491	0.0515165	0.176952	0.089094	-0.474284	-2.10581	0.485531	0.233891	0.75271	0.199086	0.291909	1.47946	P63242;Q8BGY2	P63242	Eukaryotic translation initiation factor 5A-1
		24.9316	23.7925	24.7912	25.1484	24.1665	24.3257	24.557	23.9158	25.0204	24.0627	24.6617	24.7709	27.4462	24.0741						29	1	1	NaN	NaN	NaN	NaN	0	NaN	1088000000	311	0.28241	0.806421	0.219639	0.448652	-0.764493	-0.821679	0.282978	0.340358	1.20257	0.850605	0.0843377	0.198322	0.232024	-1.18919	-1.35971	P63260	P63260	Actin, cytoplasmic 2;Actin, cytoplasmic 2, N-terminally processed
		25.8893	26.1989	25.6575	25.3379	25.8073	25.7435	26.2109	25.8465	26.2685	25.2617	25.4214	25.2608	24.8202	25.9692						5	5	5	NaN	NaN	NaN	NaN	0	NaN	1580800000	82	0.17172	0.816606	0.366915	0.286993	0.420821	1.19131	0.424604	-0.251538	-0.868969	0.736752	0.120383	0.355456	0.131492	0.551976	1.80157	P63280	P63280	SUMO-conjugating enzyme UBC9
		20.7388	20.1988	20.4255	20.2411	20.3705	20.5731	20.4463	20.5823	19.0022	18.4903	20.798	20.5017	20.89	17.4388						1	1	1	NaN	NaN	NaN	NaN	NaN	NaN	46859000	24	0.121672	0.815821	0.9376	0.431459	0.790865	0.855285	0.130761	-1.06288	-1.8059	0.168415	0.970867	1.60953	0.37901	0.882874	0.964682	P63321	P63321	Ras-related protein Ral-A
		25.7489	25.6489	26.1708	25.277	25.9723	25.7608	25.7759	26.8355	25.9993	25.8117	25.9636	25.6424	26.576	25.8017						6	6	6	NaN	NaN	NaN	NaN	0	NaN	2152900000	127	0.769534	0.284658	0.52562	0.404885	-0.295296	-0.909311	0.619532	-0.161205	-0.528856	0.38167	-0.213499	-0.958851	0.845022	0.0794075	0.205857	P63323	P63323	40S ribosomal protein S12
		27.663	27.3785	27.6899	27.6413	27.5884	27.6265	27.3371	27.6453	27.6529	27.5659	27.7278	27.4608	27.3253	27.5625						9	9	9	NaN	NaN	NaN	NaN	0	NaN	6229700000	314	0.758145	0.139619	0.289915	0.222138	0.143572	1.39386	0.335534	0.0995529	1.06511	0.579272	-0.0557054	-0.592535	0.375302	0.0997243	0.972864	P63325	P63325	40S ribosomal protein S10
		25.7368	25.6646	25.3489	25.439	25.5884	25.226	25.3549	25.84	25.1858	25.3505	24.9963	25.4828	25.8659	25.3536						11	11	10	NaN	NaN	NaN	NaN	0	NaN	1400800000	243	0.246477	0.275243	0.109384	0.909587	-0.0200974	-0.119427	0.133553	-0.324788	-1.78949	0.0439757	0.369816	2.67704	0.763972	-0.0651251	-0.317113	P63330;P62715	P63330;P62715	Serine/threonine-protein phosphatase 2A catalytic subunit alpha isoform;Serine/threonine-protein phosphatase 2A catalytic subunit beta isoform
		27.7379	27.399	27.6119	28.3765	27.4988	27.7159	27.1756	27.8021	27.8274	27.7912	28.0256	27.957	28.0097	28.1593						15	15	15	NaN	NaN	NaN	NaN	0	NaN	6875300000	458	0.0835537	0.682407	0.231373	0.351847	-0.260669	-1.02622	0.1169	0.333296	1.89306	0.712257	-0.100065	-0.390489	0.0354626	-0.4939	-2.85865	P67778	P67778	Prohibitin
		23.948	23.2278	24.6362	24.4415	24.1895	24.0969	24.5183	24.7033	23.9819	24.0733	24.2481	24.5678	24.4704	24.5782						4	4	4	NaN	NaN	NaN	NaN	0	NaN	644150000	66	0.639914	0.103389	0.770302	0.257984	-0.47541	-1.27609	0.185191	-0.275893	-1.53577	0.924232	-0.0377132	-0.0999973	0.384382	-0.161804	-0.95294	P67871	P67871	Casein kinase II subunit beta
		27.3816	27.2894	27.0913	27.2731	27.3287	27.1389	27.1493	27.5718	27.6404	27.2909	27.1822	27.0907	27.5708	27.2163						3	3	3	NaN	NaN	NaN	NaN	0	NaN	4793300000	134	0.631354	0.915143	0.603224	0.819172	-0.0337547	-0.240938	0.675588	0.0739932	0.444017	0.447132	-0.112294	-0.824611	0.979683	0.00454632	0.0267647	P67984	P67984	60S ribosomal protein L22
		28.2074	28.5156	29.1704	27.6542	28.3782	29.1015	29.164	30.7045	29.1483	27.793	28.4792	28.7178	30.3654	27.8941						16	1	1	NaN	NaN	NaN	NaN	0	NaN	34816000000	1070	0.796811	0.144016	0.667909	0.434908	-0.605555	-0.848462	0.250902	-0.863562	-1.2981	0.868513	-0.0866097	-0.174239	0.698455	0.344617	0.410475	P68134;P68033;P63268;P62737	P68134;P68033;P63268;P62737	Actin, alpha skeletal muscle;Actin, alpha cardiac muscle 1;Actin, gamma-enteric smooth muscle;Actin, aortic smooth muscle
		24.899	24.7652	25.3808	24.8407	24.4001	25.1803	25.4478	25.2628	25.3951	25.4504	25.2431	25.5601	25.0519	24.9628						7	7	7	NaN	NaN	NaN	NaN	0	NaN	1126200000	146	0.185498	0.932107	0.465031	0.375887	-0.220153	-0.971568	0.34494	0.290129	1.0425	0.0726938	-0.391443	-2.26719	0.721142	-0.118839	-0.37772	P68037	P68037	Ubiquitin-conjugating enzyme E2 L3
		28.6296	28.4282	28.2171	28.1203	28.4037	28.1297	28.3244	28.7635	28.2343	27.8511	28.1129	28.1326	28.281	28.152						19	19	19	NaN	NaN	NaN	NaN	0	NaN	9993300000	666	0.0554335	0.474435	0.780828	0.303826	0.160263	1.14557	0.123226	-0.339214	-1.85204	0.146001	0.282679	1.72033	0.237466	0.216798	1.34149	P68040	P68040	Guanine nucleotide-binding protein subunit beta-2-like 1;Guanine nucleotide-binding protein subunit beta-2-like 1, N-terminally processed
		25.4394	25.7748	25.2407	25.4845	25.5912	25.361	25.3329	25.3494	25.456	25.4404	25.4586	25.2871	24.6	25.3472						10	10	6	NaN	NaN	NaN	NaN	0	NaN	1270900000	216	0.176299	0.130641	0.261705	0.149781	0.406774	1.7005	0.578228	0.04307	0.594221	0.809366	0.0331901	0.254334	0.181735	0.330513	1.55041	P68181-4;P68181-2;P68181-3;P68181	P68181-4;P68181-2;P68181-3;P68181	cAMP-dependent protein kinase catalytic subunit beta
		27.4908	27.5545	27.7844	27.2498	27.5098	27.5138	27.3409	27.6634	27.4664	27.6525	27.4126	27.3223	27.2883	27.2393						16	11	11	NaN	NaN	NaN	NaN	0	NaN	5562400000	530	0.187261	0.227466	0.222238	0.132157	0.236563	1.79765	0.972851	0.00353702	0.0357692	0.950404	0.00938622	0.0653808	0.0390392	0.22364	2.77703	P68254;P68254-2	P68254;P68254-2	14-3-3 protein theta
		25.5681	25.5022	25.2447	25.0958	25.1154	25.0256	25.5277	25.3716	24.9928	25.1187	25.0049	25.3352	25.1851	25.1187						19	4	4	NaN	NaN	NaN	NaN	0	NaN	1192400000	182	0.100267	0.830109	0.210313	0.36807	0.13971	0.989016	0.176504	-0.221293	-1.5731	0.0675043	0.31394	2.32651	0.7614	0.0470635	0.320711	P68368	P68368	Tubulin alpha-4A chain
		22.5573	22.3433	21.9777	21.8866	22.2223	21.7684	22.4892	22.3919	22.0571	21.6584	21.3999	22.4125	22.471	22.1962						19	1	0	NaN	NaN	0	NaN	0	NaN	136250000	32	0.303457	0.0888146	0.0758792	0.434019	-0.168684	-0.850217	0.0930233	-0.512812	-2.07183	0.104087	0.486102	1.98368	0.512402	-0.141974	-0.704798	P68369;P05214	P68369;P05214	Tubulin alpha-1A chain;Tubulin alpha-3 chain
		28.5021	28.4528	28.4613	28.0309	28.2244	28.3429	28.5738	28.3541	28.2376	27.9705	27.7394	28.6764	28.2545	28.1504						23	23	5	NaN	NaN	NaN	NaN	0	NaN	12348000000	1416	0.131824	0.184268	0.15714	0.994711	0.00130892	0.00696684	0.045869	-0.391284	-2.64194	0.0864003	0.379249	2.13003	0.936689	0.0133433	0.0835067	P68372;Q9D6F9;Q922F4	P68372;Q9D6F9	Tubulin beta-4B chain;Tubulin beta-4A chain
		24.0033	23.9324	23.9199	22.9444	23.5444	23.4218	23.9411	24.251	23.3138	23.6658	24.0131	23.7808	24.3904	23.7618						9	9	5	NaN	NaN	NaN	NaN	0	NaN	492780000	46	0.739164	0.419177	0.62576	0.457628	-0.277669	-0.804519	0.673987	-0.125341	-0.446386	0.921055	0.0357677	0.104208	0.535854	-0.188096	-0.664382	P68404-2;P68404	P68404-2;P68404	Protein kinase C beta type
		26.8071	26.7749	26.929	26.6047	26.8677	26.8029	26.7918	27.2535	27.1782	26.9686	27.0457	26.667	26.9104	26.5809						13	9	9	61	NaN	NaN	NaN	0	NaN	3619300000	269	0.683329	0.502767	0.0206294	0.625142	0.0594913	0.520179	0.376268	0.135188	0.970726	0.0292008	-0.285247	-3.02642	0.230667	0.20955	1.36431	P68510	P68510	14-3-3 protein eta
		23.7588	23.8262	23.7754	23.3688	23.3685	23.4013	23.4837	24.7809	23.1116	23.033	23.2714	23.257	24.2755	23.7313						6	6	6	NaN	NaN	NaN	NaN	0	NaN	394930000	52	0.292624	0.236002	0.299387	0.80379	-0.0723131	-0.261976	0.189526	-0.619943	-1.51777	0.0109402	0.543604	3.9418	0.993542	0.0040261	0.00850649	P70122	P70122	Ribosome maturation protein SBDS
		26.8538	26.9005	26.5415	26.5704	26.41	26.7191	26.9524	26.7019	26.904	26.9966	26.6014	26.742	27.2022	26.5839						21	21	21	NaN	NaN	NaN	NaN	0	NaN	3410700000	401	0.318947	0.949448	0.909481	0.537053	-0.126163	-0.662348	0.440645	0.138181	0.837205	0.465903	-0.117477	-0.788919	0.502497	-0.146866	-0.72225	P70168	P70168	Importin subunit beta-1
		23.3206	23.6499	23.0253	23.2209	23.2022	23.5596	23.17	23.5657	23.5801	23.6936	23.2373	23.2383	23.0195	23.6406						6	6	6	NaN	NaN	NaN	NaN	0	NaN	338810000	26	0.662458	0.736877	0.345419	0.983686	0.00465981	0.0214902	0.487391	0.129302	0.749335	0.347303	-0.199524	-1.0369	0.722685	0.0748817	0.37551	P70224	P70224	GTPase IMAP family member 1
		20.2951	19.8974	19.0692	20.043	19.6683	19.8652	20.192	19.989	19.7481	18.5512	19.9141	20.7369	19.5448	20.3742						3	3	3	NaN	NaN	NaN	NaN	0	NaN	25154000	3	0.823724	0.183292	0.244726	0.404255	-0.392431	-0.910625	0.228386	-0.524122	-1.37211	0.417192	0.421715	0.883957	0.409745	-0.290024	-0.899228	P70227	P70227	Inositol 1,4,5-trisphosphate receptor type 3
		19.5188	19.8578	20.1981	18.6962	18.312	19.4304	19.7311	20.5114	18.757	18.611	18.7774	20.2897	19.5941	18.5094						2	2	2	NaN	NaN	NaN	NaN	NaN	NaN	19009000	5	0.28965	0.490386	0.323869	0.864907	0.103326	0.179078	0.208426	-0.781084	-1.44369	0.0767637	0.852582	2.22377	0.965088	0.0318276	0.0460044	P70236	P70236	Dual specificity mitogen-activated protein kinase kinase 6
		24.7823	24.4209	24.3817	25.6614	24.7589	25.0688	24.6266	24.6628	24.9858	24.8788	25.4047	25.0288	25.1083	25.2937						3	3	3	NaN	NaN	NaN	NaN	0	NaN	882690000	86	0.139501	0.981857	0.834009	0.39605	-0.332031	-0.927891	0.143885	0.310495	1.73165	0.49315	-0.278216	-0.738939	0.0436666	-0.36431	-2.68293	P70245	P70245	3-beta-hydroxysteroid-Delta(8),Delta(7)-isomerase
		19.8443	21.4902	21.0983	18.9288	21.3017	20.552	21.4157	21.5372	19.3416	20.952	20.5193	19.9991	20.4318	19.9136						5	5	5	NaN	NaN	NaN	NaN	0	NaN	50022000	15	0.206173	0.338741	0.261673	0.762712	0.225577	0.318875	0.110574	-0.930654	-1.93644	0.934452	0.069417	0.0864664	0.0141916	1.08681	3.68688	P70268;P70268-2	P70268;P70268-2	Serine/threonine-protein kinase N1
		20.7377	20.2905	20.9902	18.7065	21.0638	20.3223	21.1192	21.6478	20.5712	20.6433	20.2849	20.5119	20.2037	20.5128						2	2	2	NaN	NaN	NaN	NaN	0	NaN	50087000	13	0.666179	0.220948	0.20461	0.724658	-0.228226	-0.372686	0.169082	-0.53851	-1.60646	0.62558	-0.318547	-0.519503	0.118251	0.628832	1.88411	P70271	P70271	PDZ and LIM domain protein 4
		24.2568	24.2318	24.0832	24.2954	24.3276	24.4012	24.5129	24.6748	24.1803	23.3584	24.2688	24.08	24.4942	24.0632						8	8	8	NaN	NaN	NaN	NaN	0	NaN	606490000	88	0.0876713	0.090294	0.961535	0.974614	0.00435066	0.0334443	0.0895149	-0.54329	-2.1021	0.309754	0.280974	1.12999	0.131371	0.266666	1.80228	P70279	P70279	Surfeit locus protein 6
		21.2346	21.0255	20.606	21.5496	20.6587	20.6422	21.303	21.6232	21.5002	22.0806	21.0183	21.6717	22.7441	21.6156						4	4	4	NaN	NaN	NaN	NaN	0	NaN	84425000	23	0.0297665	0.525745	0.359375	0.0657957	-0.906533	-2.34711	0.272204	0.476239	1.23352	0.271905	-0.429073	-1.23439	0.0729633	-0.953699	-2.26424	P70290	P70290	55 kDa erythrocyte membrane protein
		20.4542	20.4611	18.8392	20.8654	20.7903	20.3263	20.9956	20.8939	18.4664	20.9179	20.6261	21.0122	21.5663	20.7337						3	3	3	NaN	NaN	NaN	NaN	0	NaN	47453000	15	0.823761	0.0914057	0.579157	0.156405	-0.949071	-1.66693	0.315026	-0.748035	-1.11636	0.863486	0.151496	0.180987	0.247362	-0.352532	-1.30932	P70295	P70295	Ancient ubiquitous protein 1
		27.6001	27.8187	27.9201	27.1281	28.4435	27.4462	27.3756	27.884	27.0319	27.316	27.5059	27.8767	27.4729	27.9078						11	11	11	NaN	NaN	NaN	NaN	0	NaN	6672100000	447	0.373323	0.157236	0.467645	0.594653	-0.135728	-0.567902	0.169127	-0.502721	-1.60625	0.221704	0.332158	1.39539	0.915904	0.0348341	0.11104	P70296	P70296	Phosphatidylethanolamine-binding protein 1;Hippocampal cholinergic neurostimulating peptide
		24.944	24.8838	25.0828	25.3118	24.9336	25.3573	24.9992	25.0179	25.143	25.1275	25.5814	25.0055	25.1227	25.4081						10	10	10	NaN	NaN	NaN	NaN	0	NaN	1134400000	183	0.173752	0.774388	0.586719	0.450286	-0.123181	-0.818537	0.272322	0.206979	1.23317	0.231463	-0.228386	-1.36161	0.529195	-0.101773	-0.675733	P70302	P70302	Stromal interaction molecule 1
		23.6704	23.5391	23.4614	23.048	23.5688	23.5177	23.9803	23.9289	23.3876	22.9791	23.3038	23.708	23.6577	23.6695						9	9	7	NaN	NaN	NaN	NaN	0	NaN	398730000	82	0.270672	0.00929109	0.580171	0.17967	-0.248674	-1.55929	0.030491	-0.525438	-2.98875	0.327492	0.206228	1.08488	0.640779	0.0705361	0.496223	P70303;P70303-3;P70303-2	P70303;P70303-3;P70303-2	CTP synthase 2
		25.0907	24.9058	25.1099	24.8662	25.162	24.911	25.0371	24.9549	24.9926	24.8262	24.8488	24.9019	24.7899	24.9919						8	8	8	NaN	NaN	NaN	NaN	0	NaN	970560000	138	0.0858453	0.796628	0.884233	0.316879	0.0985707	1.11161	0.166355	-0.127065	-1.61908	0.280058	0.103974	1.21085	0.195893	0.121662	1.49205	P70315	P70315	Wiskott-Aldrich syndrome protein homolog
		22.3627	22.7083	22.3759	22.4914	22.7196	22.8133	22.8938	22.7682	22.7574	22.7428	22.7625	22.5894	22.0326	23.0049						5	5	5	NaN	NaN	NaN	NaN	0	NaN	203900000	22	0.959833	0.502672	0.068527	0.829049	-0.0577706	-0.227495	0.359575	-0.0444608	-1.00832	0.035988	-0.269687	-2.8461	0.333688	0.256377	1.06961	P70318;P52912	P70318	Nucleolysin TIAR
		21.5342	18.2949	20.6482	21.3819	20.8068	20.5719	19.1443	22.7714	19.2754	19.4348	20.3057	21.5538	22.7455	18.9729						8	3	3	22	NaN	NaN	NaN	0	NaN	71222000	6	0.746556	0.323539	0.518078	0.64692	-0.625926	-0.486904	0.267123	-1.15163	-1.24849	0.430781	0.792832	0.85663	0.843317	-0.267131	-0.208161	P70333	P70333	Heterogeneous nuclear ribonucleoprotein H2
		19.879	20.475	20.3937	20.1335	20.2656	20.1377	21.0246	22.6675	20.0633	18.7421	20.086	20.0166	21.6658	20.1437						5	5	4	NaN	NaN	NaN	NaN	0	NaN	57083000	10	0.296931	0.0805997	0.852134	0.447317	-0.388398	-0.824253	0.135006	-1.39339	-1.78109	0.204674	0.589841	1.45787	0.633689	0.415149	0.507043	P70335-2;P70335	P70335-2;P70335	Rho-associated protein kinase 1
		25.1607	25.2721	25.7337	24.9885	25.3263	25.2736	25.3761	25.619	25.7237	25.6492	25.4174	25.189	25.4574	25.4124						2	2	2	NaN	NaN	NaN	NaN	0	NaN	1306000000	89	0.287593	0.725901	0.160501	0.762405	-0.0641696	-0.319304	0.156362	0.198043	1.66714	0.190977	-0.308049	-1.51184	0.704092	0.0458363	0.40229	P70349	P70349	Histidine triad nucleotide-binding protein 1
		20.8859	21.455	20.5346	21.5964	21.4299	20.4717	20.632	21.0403	19.0381	19.5854	20.5161	21.6383	21.6542	21.5062						3	3	3	NaN	NaN	NaN	NaN	0	NaN	69696000	20	0.218067	0.0271614	0.00263917	0.164434	-0.481565	-1.62809	0.0442333	-1.18026	-2.67217	0.0293803	1.40479	3.02107	0.0407362	-0.706096	-2.74115	P70353	P70353	Nuclear transcription factor Y subunit gamma
		20.7172	20.358	20.0475	21.8153	20.2926	18.7769	20.5085	19.245	20.3051	19.9765	20.2469	19.1651	20.1301	21.1284						1	1	1	NaN	NaN	NaN	NaN	NaN	NaN	28283000	2	0.88456	0.170607	0.256131	0.408476	0.593304	0.901852	0.388191	0.470415	0.944697	0.282506	0.558346	1.20391	0.551465	-0.435457	-0.63813	P70362	P70362	Ubiquitin fusion degradation protein 1 homolog
		27.0367	26.9784	26.7193	26.899	26.9183	26.9569	26.8252	27.2404	27.1183	26.9773	27.0301	27.1325	26.8733	27.1803						10	10	10	NaN	NaN	NaN	NaN	0	NaN	3985800000	283	0.216422	0.520601	0.729501	0.236198	-0.153689	-1.3457	0.632002	0.0567118	0.509627	0.192265	-0.133555	-1.50661	0.587216	-0.0768458	-0.579763	P70372	P70372	ELAV-like protein 1
		21.4425	21.9319	20.9028	21.127	21.1179	21.2018	21.7363	21.6174	21.7934	21.0921	21.3429	21.1525	21.3461	21.0698						6	6	6	NaN	NaN	NaN	NaN	0	NaN	72916000	25	0.654111	0.766054	0.454298	0.579167	0.161587	0.592706	0.973002	-0.00884883	-0.0355695	0.860013	-0.0584443	-0.185654	0.288155	0.22888	1.18808	P70398	P70398	Probable ubiquitin carboxyl-terminal hydrolase FAF-X
		21.5296	21.553	21.6796	19.382	21.2686	21.8014	21.7906	22.0262	19.6442	17.8197	21.8562	20.7401	22.1289	21.8303						6	6	6	NaN	NaN	NaN	NaN	0	NaN	91766000	24	0.279992	0.0882719	0.393348	0.507175	-0.530378	-0.713978	0.10746	-1.94835	-1.95875	0.331618	1.26268	1.07468	0.714479	0.155288	0.387289	P70399-3;P70399;P70399-2	P70399-3;P70399;P70399-2	Tumor suppressor p53-binding protein 1
		24.6738	23.74	24.0672	24.5427	24.8633	24.7358	24.4576	24.3805	24.2082	23.8225	24.2834	25.1358	24.7567	24.879						5	5	5	NaN	NaN	NaN	NaN	0	NaN	657030000	57	0.62748	0.00648083	0.183793	0.0574797	-0.667893	-2.45644	0.0379379	-0.504617	-2.80124	0.614627	0.151223	0.53648	0.113394	-0.314499	-1.91679	P70404	P70404	Isocitrate dehydrogenase [NAD] subunit gamma 1, mitochondrial
		27.307	27.4088	27.6906	27.0854	27.6862	27.6576	27.4784	28.3975	27.0443	26.9092	27.2448	27.4115	27.6068	27.0669						21	21	21	NaN	NaN	NaN	NaN	0	NaN	5874000000	382	0.0421673	0.0410926	0.681047	0.957362	0.0111709	0.0561966	0.0332086	-0.738834	-2.91493	0.130045	0.306829	1.81016	0.166596	0.443176	1.61795	P70429;P70429-2	P70429;P70429-2	Ena/VASP-like protein
		26.9956	27.2991	27.6905	26.5933	27.5035	27.4817	27.6587	27.8553	27.4782	27.3666	27.1247	26.9357	27.3427	26.9685						19	19	19	NaN	NaN	NaN	NaN	0	NaN	5285100000	444	0.288836	0.312113	0.0507888	0.841512	0.062304	0.210602	0.0747446	-0.301654	-2.245	0.563133	-0.178507	-0.618824	0.015102	0.542465	3.62738	P70441;P70441-2	P70441	Na(+)/H(+) exchange regulatory cofactor NHE-RF1
		21.9986	21.8461	21.501	21.4609	20.1248	21.5861	18.8539	22.0506	21.7569	21.7754	21.5387	19.6039	22.1151	19.2369						1	1	1	NaN	NaN	NaN	NaN	0	NaN	60922000	9	0.770862	0.0651707	0.785358	0.133432	1.383	1.79019	0.283201	1.03651	1.20194	0.949027	0.0112904	0.0671993	0.78157	0.335203	0.292616	P70444	P70444	BH3-interacting domain death agonist;BH3-interacting domain death agonist p15;BH3-interacting domain death agonist p13;BH3-interacting domain death agonist p11
		20.3899	20.8444	21.0269	19.9905	20.2424	20.3595	20.8464	20.6147	20.8219	20.9461	20.4853	20.0956	20.0593	19.6308						2	2	2	NaN	NaN	NaN	NaN	0	NaN	47169000	30	0.295079	0.0596658	0.0573347	0.0903	0.634357	2.09521	0.285322	0.235372	1.19598	0.556584	-0.188191	-0.629628	0.0338814	0.587176	2.8977	P70445	P70445	Eukaryotic translation initiation factor 4E-binding protein 2
		21.5306	21.9818	22.5268	21.9875	22.2778	22.5555	21.7718	22.2858	21.9613	22.3452	20.3459	22.2495	22.3038	22.1217						3	3	3	NaN	NaN	NaN	NaN	0	NaN	126850000	37	0.467242	0.195196	0.462966	0.414198	-0.218291	-0.890072	0.274631	-0.671903	-1.22645	0.457442	0.455857	0.804873	0.991426	-0.00224479	-0.0112942	P70452	P70452	Syntaxin-4
		26.5436	26.4802	26.6699	26.2925	26.6798	26.6189	26.598	27.426	26.851	26.385	26.5872	26.4208	26.6917	26.2761						11	11	11	NaN	NaN	NaN	NaN	0	NaN	3220600000	166	0.405468	0.399106	0.136085	0.816544	0.0337389	0.244523	0.432586	-0.222922	-0.85305	0.481468	-0.111183	-0.760119	0.211419	0.367844	1.43255	P70460	P70460	Vasodilator-stimulated phosphoprotein
		26.3524	26.891	26.8521	26.399	26.7056	26.695	26.8829	26.5498	26.3785	26.5856	26.6455	26.7087	26.5616	26.2657						5	5	5	NaN	NaN	NaN	NaN	0	NaN	3152900000	272	0.241869	0.743699	0.641899	0.60439	0.111577	0.552508	0.163846	-0.171752	-1.63087	0.654308	0.0870603	0.475756	0.207424	0.196269	1.44745	Q60817;P70670	Q60817;P70670	Nascent polypeptide-associated complex subunit alpha;Nascent polypeptide-associated complex subunit alpha, muscle-specific form
		20.6577	19.3752	19.8673	21.1514	19.9513	19.5008	19.5493	20.7487	19.0697	17.7161	18.5786	19.7991	18.076	18.985						1	1	1	NaN	NaN	NaN	NaN	NaN	NaN	20309000	9	0.00530255	0.944628	0.320015	0.0912894	1.30952	2.08663	0.0263181	-1.48273	-3.11778	0.0254547	1.8081	3.14735	0.127167	0.984156	1.82756	P70671	P70671	Interferon regulatory factor 3
		21.7557	22.3909	22.6314	21.938	22.0158	22.4965	22.8687	22.3533	22.3081	21.5826	22.4578	22.4687	22.8337	22.5317						3	3	3	NaN	NaN	NaN	NaN	0	NaN	168920000	21	0.780072	0.101332	0.561408	0.152414	-0.432348	-1.68698	0.349811	-0.317431	-1.03099	0.855787	0.0628605	0.19134	0.473088	-0.177777	-0.775538	P70677	P70677	Caspase-3;Caspase-3 subunit p17;Caspase-3 subunit p12
		20.5367	19.7904	19.7081	20.0559	19.0904	19.2688	19.4539	18.7206	19.0165	19.0831	19.2825	19.5273	19.471	19.2051						2	2	2	NaN	NaN	NaN	NaN	0	NaN	17017000	3	0.0682794	0.0278488	0.00356801	0.0463053	0.621648	2.63408	0.976566	-0.00607236	-0.0308722	0.0116416	0.895397	3.88003	0.244077	-0.267677	-1.31987	P70697	P70697	Uroporphyrinogen decarboxylase
		27.0994	27.4238	27.0443	27.122	26.937	26.9893	27.2556	27.2561	27.3122	27.5678	26.9519	27.0338	27.282	27.0815						18	18	18	NaN	NaN	NaN	NaN	0	NaN	4482400000	446	0.56727	0.381154	0.712314	0.751604	0.039933	0.334463	0.394546	0.16784	0.931087	0.585923	-0.104971	-0.581836	0.854946	-0.022936	-0.192472	P80313	P80313	T-complex protein 1 subunit eta
		27.6415	27.7519	27.8868	27.5239	27.6222	27.7296	27.886	27.7011	28.1426	27.7789	27.7424	27.8072	27.7803	27.631						28	28	28	NaN	NaN	NaN	NaN	0	NaN	7003000000	623	0.263704	0.591672	0.286676	0.722923	-0.0384504	-0.375168	0.275818	0.153266	1.22301	0.241613	-0.18696	-1.32786	0.954836	-0.00475661	-0.0595298	P80314	P80314	T-complex protein 1 subunit beta
		27.8729	27.8835	27.642	27.6317	27.7715	27.6822	27.835	27.7848	27.8647	27.8952	27.6591	27.8536	27.7302	27.6712						23	23	23	NaN	NaN	NaN	NaN	0	NaN	6831600000	641	0.791911	0.775084	0.593353	0.952859	0.00583839	0.0621405	0.622731	0.038005	0.523902	0.656116	-0.0488192	-0.473038	0.787817	0.0166526	0.28397	P80315	P80315	T-complex protein 1 subunit delta
		26.956	26.8318	26.9354	26.76	26.6803	26.773	27.0723	27.2156	26.882	27.0074	26.8346	26.7827	27.1243	26.8433						20	20	20	NaN	NaN	NaN	NaN	0	NaN	3744300000	337	0.922217	0.6685	0.770318	0.675605	-0.0459132	-0.443992	0.866712	-0.0272957	-0.176655	0.614487	-0.0371979	-0.536699	0.918424	0.0185804	0.107697	P80316	P80316	T-complex protein 1 subunit epsilon
		27.5103	27.5037	27.1897	27.4158	27.1745	27.1367	27.5068	27.4474	27.5794	27.5062	27.2539	27.3517	27.5403	27.4716						19	19	19	NaN	NaN	NaN	NaN	0	NaN	5187700000	392	0.316967	0.589111	0.584037	0.640162	-0.049658	-0.497161	0.390274	0.130128	0.940216	0.745038	-0.0416121	-0.343721	0.302743	-0.138174	-1.14845	P80317;Q61390	P80317	T-complex protein 1 subunit zeta
		28.0291	28.028	28.0557	27.8051	28.1574	28.0692	28.3905	28.3954	28.228	28.0435	28.0163	28.1464	28.4301	28.2129						29	29	29	NaN	NaN	NaN	NaN	0	NaN	9212600000	640	0.419903	0.01194	0.495007	0.0359231	-0.283656	-2.84764	0.221498	-0.157197	-1.39612	0.246589	-0.116461	-1.31179	0.93752	-0.00999753	-0.0824071	P80318	P80318	T-complex protein 1 subunit gamma
		20.1173	19.9866	21.215	20.0431	20.6269	20.3084	20.1765	20.6262	20.5365	20.6811	20.7088	19.0091	20.7217	20.254						3	3	2	NaN	NaN	NaN	NaN	NaN	NaN	44453000	12	0.813125	0.444905	0.221413	0.557528	0.345598	0.628066	0.204094	0.207649	1.46008	0.427251	-0.301615	-0.863664	0.371947	0.439564	0.980326	P81069-2;P81069	P81069-2;P81069	GA-binding protein subunit beta-2
		18.9937	19.3429	20.5208	18.7412	19.2254	20.6239	20.8159	20.2555	19.9725	19.972	19.9055	19.111	19.1667	19.3768						4	4	4	NaN	NaN	NaN	NaN	0	NaN	30563000	7	0.480964	0.617275	0.0326886	0.715599	0.181475	0.385677	0.534177	-0.280168	-0.667232	0.290713	-0.550359	-1.181	0.063035	1.012	2.38166	P83741-6;P83741-4;P83741-5;P83741;P83741-2;P83741-3	P83741-6;P83741-4;P83741-5;P83741;P83741-2;P83741-3	Serine/threonine-protein kinase WNK1
		23.8671	23.8801	24.143	23.5373	23.3188	23.9153	23.8586	24.4475	24.4292	24.0616	23.8808	23.3207	24.2579	23.8334						5	5	5	NaN	NaN	NaN	NaN	0	NaN	484770000	91	0.657517	0.56149	0.412494	0.852552	0.0528467	0.195696	0.468423	0.2388	0.784209	0.238205	-0.266998	-1.33904	0.828371	0.081045	0.228416	P83870	P83870	PHD finger-like domain-containing protein 5A
		25.6541	26.2554	25.9277	25.9304	25.7096	25.8856	25.9221	25.1936	26.0354	25.959	25.9393	25.6591	25.3147	25.9598						5	5	5	NaN	NaN	NaN	NaN	0	NaN	1796800000	119	0.992647	0.0697997	0.817815	0.221968	0.297403	1.39446	0.194011	0.300167	1.49957	0.817092	-0.0359701	-0.243774	0.900519	0.0332065	0.131485	P83882	P83882	60S ribosomal protein L36a
		21.3958	21.7197	21.4919	21.6714	21.7564	21.9725	21.3816	21.5461	21.4346	20.7145	21.5997	21.7189	21.7131	21.5224						3	3	3	NaN	NaN	NaN	NaN	0	NaN	98690000	44	0.282123	0.149533	0.318409	0.470657	-0.0817413	-0.78005	0.189839	-0.414563	-1.51649	0.247323	0.32012	1.30945	0.940211	0.012701	0.0788492	P83887;Q8VCK3	P83887	Tubulin gamma-1 chain
		25.2253	24.999	25.9805	25.2496	25.9205	26.1253	25.1912	26.7645	25.5078	25.2064	25.9148	25.6031	26.2044	25.5232						6	5	5	NaN	NaN	NaN	NaN	0	NaN	1739500000	198	0.934399	0.102666	0.458143	0.239794	-0.413287	-1.33381	0.326051	-0.457354	-1.08846	0.582187	-0.179409	-0.587836	0.620346	0.223476	0.527594	P83917	P83917	Chromobox protein homolog 1
		23.2498	23.3412	24.0514	23.0835	21.7649	22.9803	22.3003	21.9369	23.677	18.295	23.2119	22.5263	21.9592	22.5638						4	4	4	50	50	50	NaN	0	NaN	270450000	37	0.313129	0.593179	0.257567	0.0156293	1.08169	3.59476	0.740005	-0.51759	-0.350843	0.296642	1.7035	1.16481	0.782672	-0.104215	-0.291089	P83940	P83940	Transcription elongation factor B polypeptide 1
		23.3712	23.3253	23.2684	23.2763	19.2038	22.8506	23.1777	19.3636	19.4071	23.437	17.7175	22.6682	19.9187	18.4689						7	2	1	NaN	NaN	NaN	NaN	0	NaN	158830000	18	0.100956	0.303634	0.308913	0.0349823	2.95836	2.8703	0.635883	-0.961766	-0.503688	0.0791085	3.1231	2.19985	0.647713	0.797028	0.485704	P84084	P84084	ADP-ribosylation factor 5
		26.4133	26.6095	27.7341	26.5605	26.6211	27.3471	26.9224	27.2158	27.0083	27.2226	26.9993	26.6384	27.7277	26.7836						4	4	4	NaN	NaN	NaN	NaN	0	NaN	4104300000	246	0.601429	0.692116	0.664628	0.651738	-0.220517	-0.479626	0.812934	0.0501002	0.249453	0.528438	-0.247362	-0.67703	0.9487	-0.0232555	-0.0676322	P84089	P84089	Enhancer of rudimentary homolog
		22.2986	21.8531	22.2826	22.3589	22.498	22.1946	22.0633	22.7315	22.0866	23.0242	22.2622	22.0097	22.6688	22.7792						3	3	3	NaN	NaN	NaN	NaN	0	NaN	167470000	28	0.356218	0.57313	0.71439	0.290778	-0.287587	-1.18082	0.785997	0.0858008	0.286486	0.39254	-0.259368	-0.935364	0.688801	-0.11402	-0.424569	P84091	P84091	AP-2 complex subunit mu
		27.5938	27.8487	27.5785	27.5665	27.7117	27.5611	27.6923	28.0999	27.4503	27.5264	27.487	27.5965	28.0383	27.6547						13	13	12	NaN	NaN	67	NaN	0	NaN	6322800000	505	0.431181	0.0860674	0.44848	0.446496	-0.116271	-0.82584	0.100962	-0.278361	-2.00755	0.110105	0.158989	1.93976	0.986907	0.00310103	0.0172465	P84096;Q9ER71-2;Q8R527;Q9ER71	P84096	Rho-related GTP-binding protein RhoG
		26.2456	25.8574	25.6745	26.0641	25.7969	25.6742	25.3797	26.1843	25.6486	25.5979	25.7061	25.867	26.4512	26.03						3	3	3	NaN	NaN	NaN	NaN	0	NaN	1826200000	170	0.871052	0.566478	0.0424667	0.485298	-0.155679	-0.753134	0.610848	-0.107901	-0.542378	0.0924179	0.309507	2.07696	0.204794	-0.357285	-1.45741	P84099	P84099	60S ribosomal protein L19
		27.7776	27.9168	27.9943	27.8349	28.0275	28.045	27.726	27.4951	28.1872	27.8497	27.749	27.896	27.9402	28.0814						9	9	8	NaN	NaN	NaN	NaN	0	NaN	7476100000	331	0.3588	0.892478	0.63102	0.26483	-0.0916289	-1.25534	0.605762	0.10523	0.55035	0.7166	-0.0477338	-0.384239	0.40128	-0.149125	-0.916854	P84104-2;P84104	P84104-2;P84104	Serine/arginine-rich splicing factor 3
		34.4426	34.1842	34.3019	34.8614	34.8502	34.4704	34.0647	34.2393	34.7153	34.6058	34.7635	34.3881	34.8416	35.5517						17	17	1	NaN	NaN	NaN	NaN	0	NaN	755570000000	2861	0.0776161	0.702914	0.499672	0.209223	-0.479614	-1.44071	0.217276	0.288719	1.41119	0.225825	-0.247336	-1.38096	0.193847	-0.520998	-1.50023	P84228	P84228	Histone H3.2
		22.3125	21.6709	21.2297	22.1231	21.8485	20.2017	20.1283	19.6258	20.4165	19.7801	20.8714	22.4349	19.3703	21.7089						2	2	2	16	16	16	NaN	0	NaN	78719000	25	0.482115	0.410872	0.0602375	0.458277	0.662699	0.803288	0.885934	-0.0950718	-0.150926	0.0127892	1.47805	3.78765	0.487655	-0.720276	-0.748857	P85094	P85094	Isochorismatase domain-containing protein 2A, mitochondrial
		19.956	20.1529	18.7377	19.8239	19.5334	20.1249	17.0572	19.8002	19.6421	19.2387	19.8643	19.7728	19.515	19.3252						1	1	1	NaN	NaN	NaN	NaN	0	NaN	15135000	2	0.735626	0.493817	0.6063	0.752857	0.130006	0.3327	0.61444	0.452806	0.536772	0.840532	0.0859251	0.211927	0.645834	-0.408725	-0.488548	P97287	P97287	Induced myeloid leukemia cell differentiation protein Mcl-1 homolog
		24.1083	24.0505	23.8329	23.5705	24.091	23.8208	24.1139	24.3243	24.3015	24.1595	23.7597	24.055	24.1274	23.8317						9	9	9	NaN	NaN	NaN	NaN	0	NaN	523630000	134	0.690371	0.508003	0.302217	0.513647	-0.114164	-0.702621	0.942164	-0.0139256	-0.0762671	0.398048	-0.183054	-0.92366	0.587733	0.0828158	0.578936	P97310	P97310	DNA replication licensing factor MCM2
		23.9211	24.2273	23.9777	23.8789	23.8898	24.3144	24.298	24.4352	24.3922	24.1951	23.9012	23.9712	24.3806	24.0546						14	14	14	NaN	NaN	NaN	NaN	0	NaN	555260000	117	0.791686	0.313391	0.286246	0.379928	-0.134236	-0.962665	0.714227	-0.0715052	-0.387652	0.333081	-0.161612	-1.0711	0.596912	0.0988808	0.564318	P97311	P97311	DNA replication licensing factor MCM6
		25.5571	25.7997	25.9512	25.5087	25.9059	25.7023	26.0109	26.2829	25.5638	25.2151	25.5916	25.2978	25.5354	25.5925						8	8	8	NaN	NaN	NaN	NaN	0	NaN	1671500000	172	0.00812265	0.177724	0.291412	0.173846	0.228941	1.58489	0.0315265	-0.518708	-2.95979	0.181639	0.247344	1.55083	0.0270266	0.500305	3.09432	P97315	P97315	Cysteine and glycine-rich protein 1
		19.8794	19.228	21.1246	21.0046	20.8435	21.454	18.7722	20.3002	19.2159	18.4236	21.4149	20.7496	22.236	20.7086						1	1	1	NaN	NaN	NaN	NaN	0	NaN	43296000	17	0.832762	0.28538	0.243426	0.235731	-0.92227	-1.34725	0.543988	-0.657665	-0.650642	0.528885	0.62434	0.676264	0.316361	-0.888945	-1.11293	P97350	P97350	Plakophilin-1
		28.2622	28.1465	28.118	28.1472	28.1342	28.2594	28.1701	28.2361	28.6774	28.5016	27.9991	28.0913	28.2129	28.0465						13	13	13	NaN	NaN	NaN	NaN	0	NaN	9546100000	500	0.456674	0.292756	0.122868	0.401244	0.0515663	0.916928	0.317017	0.192756	1.11126	0.254392	-0.224232	-1.28719	0.183921	0.0830423	1.54112	P97351	P97351	40S ribosomal protein S3a
		24.568	24.4692	25.1575	23.8256	24.6878	25.1882	24.6293	24.851	25.2102	25.3166	25.2167	24.6459	24.4501	24.7251						4	4	4	NaN	NaN	NaN	NaN	0	NaN	908340000	102	0.189627	0.650863	0.0228444	0.769727	-0.101955	-0.309077	0.0426233	0.408754	2.70315	0.0704251	-0.742754	-2.29254	0.214912	0.232044	1.41974	P97352	P97352	Protein S100-A13
		23.1339	23.241	22.706	22.3419	23.4462	22.4973	22.8004	21.6361	21.3522	22.5139	22.6286	23.443	21.8299	23.019						5	5	5	NaN	NaN	NaN	NaN	0	NaN	212980000	42	0.492714	0.772421	0.26793	0.853601	0.0917347	0.194283	0.477524	-0.430116	-0.767351	0.160663	0.690812	1.64609	0.789816	-0.168961	-0.281209	P97355	P97355	Spermine synthase
		28.6037	28.7674	29.0905	28.2081	28.7722	28.9439	28.967	29.4379	28.4951	28.6304	28.7776	28.4123	28.7792	28.4891						18	18	18	NaN	NaN	NaN	NaN	0	NaN	13945000000	833	0.122694	0.261935	0.173717	0.669215	0.107191	0.453466	0.0817031	-0.395858	-2.17426	0.890335	0.0330119	0.145053	0.0589376	0.470037	2.43608	P97371	P97371	Proteasome activator complex subunit 1
		27.5027	28.0537	28.0342	27.3674	27.5522	27.9563	27.8548	27.779	27.7728	27.833	27.7706	27.4965	27.5131	27.4373						14	14	14	NaN	NaN	NaN	NaN	0	NaN	7225500000	460	0.311677	0.38189	0.161171	0.278142	0.257223	1.21633	0.951571	0.0065759	0.0638398	0.813132	-0.0526503	-0.249183	0.0324905	0.303297	2.93377	P97372	P97372	Proteasome activator complex subunit 2
		24.4433	24.5886	24.1028	24.0631	24.2865	24.4127	23.7699	24.8257	24.4008	24.5395	24.3865	24.1491	24.3773	23.9948						7	7	7	NaN	NaN	NaN	NaN	0	NaN	655250000	90	0.982413	0.531852	0.375772	0.512594	0.125706	0.704462	0.668237	0.118567	0.454921	0.406622	-0.142829	-0.905696	0.607279	0.149968	0.547968	P97376	P97376	Protein FRG1
		20.0507	19.5984	19.8044	19.7272	19.9382	19.3656	18.922	20.2619	19.9807	18.8217	19.332	20.4488	19.5891	19.4023						1	1	1	NaN	NaN	NaN	NaN	0	NaN	22363000	9	0.683429	0.748633	0.283582	0.952585	-0.0182616	-0.0625016	0.61173	-0.243761	-0.540999	0.22633	0.417013	1.37921	0.68406	-0.191514	-0.431524	P97379-2;P97379	P97379-2;P97379	Ras GTPase-activating protein-binding protein 2
		26.7869	26.734	26.8588	26.6668	26.7096	26.8548	26.9071	27.0626	26.7253	26.5554	26.7557	26.5198	26.8034	26.831						17	17	17	NaN	NaN	NaN	NaN	0	NaN	3506600000	364	0.104842	0.237926	0.565824	0.669297	0.0435704	0.453345	0.0978165	-0.204736	-2.03236	0.295643	0.0828147	1.16752	0.225721	0.165492	1.38132	P97384	P97384	Annexin A11
		24.2376	24.613	25.9112	24.865	24.179	26.0663	25.5713	27.1486	26.3682	26.4749	25.8344	24.8652	26.7487	25.21						6	6	6	NaN	NaN	NaN	NaN	0	NaN	1747600000	123	0.257199	0.673297	0.171803	0.325958	-0.701235	-1.0887	0.545494	0.484559	0.648112	0.0340039	-1.31917	-2.8946	0.884851	0.133372	0.152372	P97450	P97450	ATP synthase-coupling factor 6, mitochondrial
		21.3973	21.7429	20.5878	20.564	21.1685	21.4469	21.4923	21.76	20.2043	21.0758	20.9714	21.3232	22.0405	21.0387						3	3	3	NaN	NaN	NaN	NaN	0	NaN	75768000	17	0.540348	0.0601795	0.538929	0.400531	-0.394488	-0.918427	0.0457193	-0.716412	-2.64466	0.475768	0.322499	0.770585	0.998482	-0.000575225	-0.00199999	P97452	P97452	Ribosome biogenesis protein BOP1
		26.6031	26.6499	26.5199	26.4987	27.0534	26.6585	26.4166	26.7817	26.4695	26.5739	26.3615	26.7187	27.1439	26.6118						8	8	8	NaN	NaN	NaN	NaN	0	NaN	3161700000	258	0.99143	0.0470754	0.387336	0.13088	-0.256883	-1.80519	0.176732	-0.259282	-1.5721	0.192921	0.099642	1.50396	0.659065	-0.0972432	-0.468614	P97461	P97461	40S ribosomal protein S5;40S ribosomal protein S5, N-terminally processed
		23.0025	22.8245	22.7097	22.7127	23.1732	22.9212	22.8241	22.6321	22.8928	22.7971	22.9214	23.2098	23.0316	22.8375						4	3	3	NaN	14	14	NaN	0	NaN	250330000	66	0.307308	0.252739	0.669042	0.138052	-0.213952	-1.76376	0.904712	-0.0172297	-0.125906	0.534977	-0.0580967	-0.665872	0.427803	-0.138625	-0.862561	P97470	P97470	Serine/threonine-protein phosphatase 4 catalytic subunit
		20.7425	21.3687	20.4735	20.1593	20.9153	20.3104	20.6597	21.3267	17.6184	19.6349	20.398	19.2216	21.2794	20.4147						2	2	2	NaN	NaN	NaN	NaN	0	NaN	42426000	26	0.0633075	0.279212	0.326756	0.54344	0.380757	0.651563	0.0845185	-1.58595	-2.14744	0.110148	1.46891	1.93945	0.414546	0.497795	0.889359	P97492	P97492	Regulator of G-protein signaling 14
		21.7021	21.5404	20.9454	18.023	21.3619	20.8287	20.7252	19.3362	19.4732	19.2861	19.633	21.6397	19.2842	21.3738						7	2	2	NaN	NaN	NaN	NaN	0	NaN	55337000	18	0.511063	0.401291	0.343787	0.865063	-0.213209	-0.178869	0.0873768	-1.09888	-2.12116	0.334469	1.08862	1.06771	0.811227	-0.202945	-0.251787	P97496-2;P97496	P97496-2;P97496	SWI/SNF complex subunit SMARCC1
		20.198	18.9245	18.7788	20.556	20.1664	18.0755	20.2506	19.9701	19.7598	20.4831	19.9777	20.515	20.4108	20.5059						3	3	3	NaN	NaN	NaN	NaN	0	NaN	26189000	5	0.142097	0.680766	0.637823	0.164443	-0.862907	-1.62805	0.504524	0.457892	0.718658	0.448588	-0.459236	-0.821803	0.218258	-0.861562	-1.40766	P97742	P97742	Carnitine O-palmitoyltransferase 1, liver isoform
		23.6356	23.8908	23.8671	24.1423	23.908	23.7683	23.4858	24.1487	23.9735	23.7382	23.7997	23.953	24.0918	24.0348						4	4	4	NaN	NaN	NaN	NaN	0	NaN	468760000	100	0.496715	0.655473	0.280941	0.312905	-0.142617	-1.12182	0.958952	0.00941706	0.054098	0.744664	0.0468259	0.344251	0.287742	-0.19886	-1.18923	P97760	P97760	DNA-directed RNA polymerase II subunit RPB3
		20.6118	21.2537	21.409	20.0212	21.2414	18.1235	21.2268	21.2946	21.3035	21.0042	18.8786	18.9961	20.6388	21.2163						1	1	1	NaN	NaN	NaN	NaN	NaN	NaN	49989000	19	0.648188	0.70882	0.85793	0.457932	0.540206	0.803943	0.948638	-0.0761824	-0.0677131	0.588335	0.428551	0.577973	0.868811	0.187837	0.17384	P97765	P97765	WW domain-binding protein 2
		19.871	20.8836	17.947	18.3949	18.9103	18.8833	18.0006	19.9137	18.3643	19.7918	19.0454	20.3571	18.7325	18.2188						1	1	1	NaN	NaN	NaN	NaN	NaN	NaN	11316000	6	0.978447	0.748765	0.740462	0.865967	0.171339	0.177655	0.817663	0.140209	0.242995	0.821591	0.206953	0.237641	0.814367	-0.175823	-0.247495	P97770-3;P97770-2;P97770	P97770-3;P97770-2;P97770	THUMP domain-containing protein 3
		25.2747	25.2576	25.4026	25.5095	25.2635	25.1765	25.6229	25.6816	25.4549	25.7924	25.5768	25.6424	25.8663	25.6577						10	10	10	NaN	NaN	NaN	NaN	0	NaN	1441700000	146	0.020784	0.362521	0.844556	0.0113351	-0.361064	-3.90648	0.361032	0.171888	1.00499	0.0713391	-0.246916	-2.28223	0.136799	-0.286036	-1.77084	P97807-2;P97807	P97807-2;P97807	Fumarate hydratase, mitochondrial
		20.8798	20.7914	21.8189	21.7757	21.2486	22.033	20.9827	22.2958	21.6888	21.0287	21.55	20.9553	19.1546	21.1961						2	2	2	NaN	NaN	NaN	NaN	0	NaN	89087000	14	0.174069	0.535914	0.111416	0.221796	0.88111	1.39507	0.614938	-0.217539	-0.535995	0.785783	-0.106046	-0.286783	0.124534	1.2047	1.84382	P97808	P97808	FXYD domain-containing ion transport regulator 5
		20.5183	20.6358	20.6969	20.2254	20.7439	20.6871	20.7477	21.308	20.4355	19.5276	20.8121	20.305	20.6285	20.5043						2	2	2	NaN	NaN	NaN	NaN	0	NaN	49191000	26	0.126116	0.157312	0.74342	0.796774	0.0398787	0.271618	0.151753	-0.613277	-1.69035	0.480471	0.260719	0.761942	0.0937886	0.392437	2.06538	P97814	P97814	Proline-serine-threonine phosphatase-interacting protein 1
		20.5576	20.8218	21.2308	21.0343	21.096	21.1945	21.9759	22.0046	21.1028	19.271	21.4766	21.1289	21.2345	21.3424						3	3	3	NaN	NaN	NaN	NaN	0	NaN	73837000	23	0.367408	0.0799428	0.955264	0.129116	-0.324127	-1.81574	0.197188	-0.95094	-1.48692	0.64195	0.294311	0.494442	0.309706	0.332503	1.13012	P97820;P83510-2;Q9JM52-2;Q9JM52;P83510;Q9JM52-3	P97820;P83510-2;Q9JM52-2;Q9JM52;P83510;Q9JM52-3	Mitogen-activated protein kinase kinase kinase kinase 4;Traf2 and NCK-interacting protein kinase;Misshapen-like kinase 1
		24.2591	24.6921	24.6043	23.9371	24.4339	24.6652	24.9912	24.2165	24.5132	24.4696	24.6072	24.6392	23.7868	24.5537						4	4	4	NaN	NaN	NaN	NaN	0	NaN	785160000	55	0.80322	0.874898	0.290287	0.884735	0.0465711	0.152528	0.823834	-0.0467008	-0.234586	0.483293	-0.156857	-0.756785	0.442166	0.250129	0.83424	P97823-2;P97823	P97823-2;P97823	Acyl-protein thioesterase 1
		23.7281	24.0424	24.4871	23.5103	24.3745	24.3632	24.6352	24.9513	24.2045	24.3167	24.3347	24.3577	24.3449	24.176						5	5	5	50	50	50	NaN	0	NaN	666490000	132	0.860327	0.035034	0.0656002	0.228149	-0.350904	-1.37293	0.137474	-0.295743	-1.76702	0.233045	-0.343344	-1.35626	0.152798	0.288183	1.68503	P97825	P97825	Hematological and neurological expressed 1 protein;Hematological and neurological expressed 1 protein, N-terminally processed
		22.8132	22.3855	22.3099	22.8538	22.8334	22.3183	22.0681	22.1808	21.6864	22.4503	21.7411	22.4585	22.8154	22.4738						5	5	5	NaN	NaN	NaN	NaN	0	NaN	174230000	74	0.275933	0.46631	0.031707	0.96849	0.00803614	0.0415178	0.231317	-0.390892	-1.36211	0.0631212	0.63132	2.38056	0.344045	-0.232392	-1.04463	P97855	P97855	Ras GTPase-activating protein-binding protein 1
		27.0103	26.9226	26.4544	26.4414	26.4342	26.4734	27.0112	26.3165	27.2057	26.5828	26.1204	26.9578	26.4535	26.4673						21	5	4	NaN	NaN	16	NaN	0	NaN	3401600000	408	0.993137	0.655865	0.731636	0.734856	0.0809517	0.358148	0.818439	0.0774945	0.241937	0.832417	0.0708625	0.222921	0.78072	-0.0674052	-0.293794	P99024	P99024	Tubulin beta-5 chain
		25.6454	25.7961	25.6239	25.6622	25.2913	25.3956	24.4011	24.9585	26.0659	25.6325	25.7309	25.7722	25.5786	25.2322						7	7	7	NaN	NaN	NaN	NaN	0	NaN	1399800000	74	0.0711415	0.00962208	0.251613	0.320667	0.154198	1.10198	0.0387113	0.79815	2.78416	0.331581	-0.127892	-1.07478	0.141691	-0.51606	-1.74357	P99026	P99026	Proteasome subunit beta type-4
		29.0697	29.1241	29.185	29.1004	29.4098	29.1168	28.6882	29.6427	29.3612	29.2382	29.2352	29.5517	29.5138	29.1784						9	9	9	NaN	NaN	NaN	NaN	0	NaN	18389000000	736	0.208432	0.414043	0.87848	0.0357206	-0.294847	-2.85246	0.805455	0.0638641	0.259693	0.0171488	-0.158434	-3.50737	0.480565	-0.200277	-0.761771	P99027	P99027	60S acidic ribosomal protein P2
		24.087	23.7353	25.126	24.2531	24.6976	24.4796	24.6134	25.4151	24.3772	24.0618	24.6553	25.3259	24.0346	24.8386						4	4	4	NaN	NaN	NaN	NaN	0	NaN	822130000	117	0.994315	0.134365	0.814399	0.400185	-0.432654	-0.919155	0.187744	-0.436678	-1.52512	0.871448	-0.0643868	-0.170304	0.87115	0.0684114	0.170703	P99028	P99028	Cytochrome b-c1 complex subunit 6, mitochondrial
		26.3913	26.4096	26.6211	26.3522	26.6009	26.5293	26.8709	27.0378	26.5413	26.4434	26.6391	26.4482	26.7754	26.6874						8	8	8	NaN	NaN	NaN	NaN	0	NaN	3151300000	311	0.8942	0.0346898	0.257058	0.135064	-0.193437	-1.78075	0.199358	-0.218455	-1.47839	0.305742	-0.0977112	-1.14051	0.48325	0.122729	0.756864	P99029-2;P99029	P99029-2;P99029	Peroxiredoxin-5, mitochondrial
		24.7585	24.5737	24.5118	24.4964	24.6488	24.6362	24.5266	24.883	24.5842	24.4017	24.3338	24.2875	24.5575	24.383						5	5	4	15	15	NaN	NaN	0	NaN	723780000	102	0.0184693	0.614236	0.432683	0.130372	0.17573	1.80821	0.083928	-0.233734	-2.15298	0.186163	0.145173	1.5317	0.0625329	0.264291	2.38812	Q00417;Q00417-2;Q924A0-9;Q924A0-2;Q924A0-3;Q924A0;Q924A0-8;Q9Z1J1;Q924A0-4	Q00417;Q00417-2	Transcription factor 7
		24.513	24.4553	24.2603	24.1499	24.5544	24.2424	24.6143	24.6325	24.6206	24.5403	24.5635	24.5439	24.1451	24.505						12	12	12	NaN	NaN	NaN	NaN	0	NaN	726170000	128	0.534674	0.835739	0.0893763	0.729496	-0.053352	-0.365778	0.584741	0.0639451	0.583731	0.0735124	-0.23021	-2.25825	0.488999	0.112912	0.746424	Q00612;P97324	Q00612	Glucose-6-phosphate 1-dehydrogenase X
		20.5988	20.5971	20.6882	20.6182	20.0795	20.2255	20.8107	20.3465	20.5647	20.7578	20.4311	20.3766	20.906	20.652						3	3	3	NaN	NaN	NaN	NaN	0	NaN	45616000	16	0.346968	0.328577	0.214109	0.888121	-0.0192976	-0.148007	0.330421	0.218967	1.07763	0.643175	0.0410172	0.49258	0.272579	-0.279282	-1.23242	Q00651	Q00651	Integrin alpha-4
		24.2193	24.1111	24.7937	24.3099	24.5163	25.0646	24.7253	24.7932	24.7991	24.6469	24.8294	24.4923	24.7177	24.5448						7	7	7	NaN	NaN	NaN	NaN	0	NaN	802490000	139	0.392171	0.189635	0.0308475	0.280244	-0.226494	-1.21032	0.912388	-0.0164267	-0.115707	0.0822528	-0.399968	-2.16894	0.248653	0.189901	1.30521	Q00899;Q3TTC2;P22227	Q00899	Transcriptional repressor protein YY1
		27.4651	27.2704	27.0568	27.2957	27.3151	27.4845	27.2923	27.6829	27.2344	27.37	27.4043	27.2717	27.813	27.3644						20	20	20	NaN	NaN	NaN	NaN	0	NaN	5365600000	451	0.627227	0.146566	0.90651	0.272985	-0.211014	-1.23124	0.395176	-0.107455	-0.929746	0.578518	-0.0642292	-0.593753	0.832155	-0.03933	-0.223278	Q00PI9	Q00PI9	Heterogeneous nuclear ribonucleoprotein U-like protein 2
		22.8113	19.453	23.206	22.8257	23.1294	23.2416	19.4973	23.7268	23.4252	20.1267	23.1152	19.2926	23.2494	23.2703						2	2	2	7	7	7	NaN	0	NaN	249210000	28	0.884501	0.952524	0.777522	0.931795	0.136597	0.0899817	0.908011	-0.176404	-0.121521	0.917479	-0.148368	-0.108951	0.784534	0.461369	0.28851	Q01147-2;Q01147;P27699-11;P27699-10;P27699-2;P27699-8;P27699-7;P27699-6;P27699-5;P81269	Q01147-2;Q01147;P27699-11;P27699-10;P27699-2;P27699-8;P27699-7;P27699-6;P27699-5;P81269	Cyclic AMP-responsive element-binding protein 1;Cyclic AMP-dependent transcription factor ATF-1
		21.7736	21.4118	21.3657	21.5213	21.5708	21.0644	21.5898	21.9687	21.6304	21.4235	21.6479	21.2053	21.358	21.5204						5	3	3	NaN	NaN	NaN	NaN	0	NaN	93187000	9	0.611326	0.597779	0.39026	0.288209	0.156882	1.18793	0.937315	0.018823	0.0826785	0.707303	-0.0491541	-0.397641	0.457006	0.187213	0.805701	Q01405	Q01405	Protein transport protein Sec23A
		22.0652	23.3087	22.7825	22.7608	22.8504	23.2012	22.7501	22.5756	22.8766	23.3653	23.3462	22.0657	23.7859	23.5192						6	3	3	NaN	NaN	NaN	NaN	0	NaN	229280000	27	0.22533	0.905842	0.75203	0.497691	-0.394276	-0.730803	0.147537	0.351744	1.7122	0.21647	-0.466762	-1.4141	0.581082	-0.279259	-0.589616	Q01514	Q01514	Interferon-induced guanylate-binding protein 1
		23.9587	23.742	23.2209	23.5993	22.7709	22.8262	22.5288	22.1606	21.125	23.2838	22.3957	22.8527	21.5055	23.2221						5	5	5	NaN	NaN	NaN	NaN	0	NaN	257250000	48	0.0823363	0.200623	0.100793	0.0671707	1.10347	2.33048	0.60735	-0.303467	-0.547856	0.0577468	1.36209	2.45267	0.927957	0.0448523	0.0950634	Q01730	Q01730	Ras suppressor protein 1
		26.1364	26.4833	27.7601	26.0231	26.6776	27.0228	27.0165	26.9537	26.6873	26.5818	27.057	26.5173	26.8114	26.6392						9	3	3	NaN	NaN	NaN	NaN	0	NaN	3627900000	117	0.86562	0.611934	0.404615	0.912325	-0.0552441	-0.115791	0.398966	-0.142314	-0.921723	0.734476	-0.174643	-0.358688	0.0810222	0.261712	2.18089	Q01768	Q01768	Nucleoside diphosphate kinase B
		28.3772	28.4411	28.4452	28.1791	28.3417	28.2289	28.5	28.5817	28.6033	28.4864	28.3435	28.0782	28.5311	28.255						44	44	44	NaN	NaN	NaN	NaN	0	NaN	10540000000	1030	0.964887	0.564574	0.194725	0.608178	0.0725611	0.546559	0.590759	0.0647008	0.574102	0.281523	-0.11709	-1.20669	0.427041	0.124951	0.864084	Q01853	Q01853	Transitional endoplasmic reticulum ATPase
		22.5555	21.67	22.507	22.5499	21.822	22.4256	22.2071	22.4874	21.5261	22.129	22.1689	21.812	22.6369	22.452						4	4	4	NaN	NaN	NaN	NaN	0	NaN	155650000	61	0.465369	0.618897	0.309029	0.953568	0.0202743	0.0612039	0.29028	-0.294192	-1.1822	0.276064	0.379249	1.2223	0.822836	-0.0647834	-0.235944	Q01965	Q01965	T-lymphocyte surface antigen Ly-9
		28.5764	28.8928	28.5107	28.4048	28.4663	28.4369	28.7793	28.7517	28.7175	28.7813	28.5537	28.4953	28.3166	28.3565						35	35	35	NaN	NaN	NaN	NaN	0	NaN	11926000000	1344	0.482504	0.209694	0.118299	0.178811	0.206716	1.56302	0.56152	0.0756297	0.621478	0.547768	-0.088006	-0.644303	0.119533	0.219093	1.87571	Q02053;P31254	Q02053	Ubiquitin-like modifier-activating enzyme 1
		22.7629	23.0012	22.7182	22.2215	23.1426	22.5046	22.8133	23.4984	22.9093	22.6685	22.3821	22.6767	22.9894	22.4773						5	5	4	NaN	NaN	NaN	NaN	0	NaN	228940000	32	0.43351	0.281969	0.504897	0.873911	-0.0384754	-0.167004	0.288341	-0.336439	-1.18756	0.925825	0.0227022	0.0978876	0.373914	0.275262	0.975944	Q02111	Q02111	Protein kinase C theta type
		23.0405	22.0569	23.6688	22.6226	23.2018	24.0161	18.7347	22.5171	22.403	23.2374	22.8571	22.0508	26.4114	22.2801						11	11	11	NaN	NaN	NaN	NaN	0	NaN	379820000	64	0.457853	0.919433	0.449042	0.583321	-0.733591	-0.586012	0.630605	0.715047	0.511771	0.975218	0.0146958	0.0326492	0.458158	-1.46333	-0.803513	Q02257;Q02248	Q02257	Junction plakoglobin
		24.4604	24.5985	24.9068	24.9064	24.5453	25.039	24.8739	24.7385	25.0663	25.3005	25.2522	25.0667	25.0557	24.9966						13	13	13	NaN	NaN	NaN	NaN	0	NaN	952080000	181	0.00352652	0.797456	0.226156	0.0620313	-0.321632	-2.39463	0.0314013	0.407162	2.96324	0.0203772	-0.48831	-3.34783	0.11255	-0.240483	-1.92262	Q02819	Q02819	Nucleobindin-1
		24.8453	24.9326	24.6987	24.2419	24.685	24.938	24.7145	24.8093	24.952	24.1284	24.6565	24.4252	24.4426	24.6936						6	6	5	NaN	NaN	NaN	NaN	0	NaN	784450000	66	0.232909	0.805751	0.579282	0.453149	0.159175	0.813051	0.373224	-0.207741	-0.977479	0.725943	0.100668	0.37085	0.043391	0.266248	2.68822	Q03267;Q03267-6;Q03267-4;Q03267-5;Q03267-2;Q03267-3	Q03267;Q03267-6;Q03267-4;Q03267-5;Q03267-2;Q03267-3	DNA-binding protein Ikaros
		24.8008	25.3419	27.0187	25.5098	25.803	26.6367	18.365	27.4728	26.7752	26.974	26.9739	25.5898	27.9861	26.2439						1	1	1	NaN	NaN	NaN	NaN	NaN	NaN	2771400000	34	0.238305	0.571386	0.766509	0.304573	-0.938802	-1.14359	0.38916	2.3383	0.942611	0.0795609	-1.23988	-2.19533	0.460789	-2.03723	-0.798535	Q03350	Q03350	Thrombospondin-2
		22.6434	23.2823	23.107	23.0144	23.2879	23.4129	23.412	23.6696	22.7609	23.368	23.2938	23.0913	23.4573	23.4252						5	5	5	NaN	NaN	NaN	NaN	0	NaN	320150000	52	0.976048	0.031377	0.365586	0.155465	-0.3128	-1.67161	0.162365	-0.304677	-1.63792	0.592367	-0.129097	-0.571538	0.415659	0.120974	0.887084	Q03958	Q03958	Prefoldin subunit 6
		23.786	23.7609	23.6073	23.1151	23.6988	23.4786	23.8512	23.9282	23.8062	23.9106	23.6338	22.8677	23.8694	23.5747						6	6	5	NaN	NaN	NaN	NaN	0	NaN	398420000	81	0.804761	0.770282	0.156104	0.691844	0.130052	0.420116	0.756609	0.0442961	0.327428	0.321012	-0.216194	-1.10111	0.322117	0.301949	1.09832	Q04207-2;Q04207	Q04207-2;Q04207	Transcription factor p65
		25.7617	25.8166	25.7596	26.2389	25.6879	25.8675	26.0882	26.1516	26.1699	26.4085	25.9761	25.7087	26.3651	25.9484						14	14	14	NaN	NaN	NaN	NaN	0	NaN	1940900000	319	0.219764	0.741025	0.404989	0.614389	-0.113209	-0.536851	0.208253	0.236084	1.44434	0.152353	-0.290634	-1.68729	0.784984	-0.0586591	-0.287888	Q04750;Q8R4U6	Q04750	DNA topoisomerase 1
		29.3211	29.5542	29.3152	29.0392	29.2528	29.1985	29.436	29.3844	29.1757	29.1913	29.0959	29.093	29.3273	29.1358						11	10	5	NaN	NaN	NaN	NaN	0	NaN	19089000000	564	0.0953626	0.806343	0.897468	0.418239	0.122068	0.881827	0.0667868	-0.163656	-2.33509	0.282045	0.153116	1.20521	0.19671	0.132608	1.48881	Q05144	Q05144	Ras-related C3 botulinum toxin substrate 2
		22.2096	22.612	23.1985	22.7422	22.7398	23.2264	22.9932	23.3446	22.5597	22.9053	22.9472	22.557	23.4725	23.0302						4	4	4	NaN	NaN	NaN	NaN	0	NaN	234830000	49	0.882229	0.125174	0.662906	0.360276	-0.329343	-1.00672	0.209057	-0.271948	-1.44133	0.682956	-0.113508	-0.433149	0.844662	0.0561134	0.206344	Q05186	Q05186	Reticulocalbin-1
		21.7367	21.5821	21.7007	21.4074	21.8746	21.7595	21.9368	22.1579	21.8488	21.305	21.5879	22.0768	22.5397	21.9468						2	2	2	NaN	NaN	NaN	NaN	0	NaN	118570000	37	0.360976	0.00371101	0.267064	0.0206854	-0.581033	-3.33411	0.0856733	-0.351585	-2.13671	0.875125	0.0261331	0.165378	0.215319	-0.255581	-1.41827	Q05512-3;Q05512-4;Q05512-2;Q05512	Q05512-3;Q05512-4;Q05512-2;Q05512	Serine/threonine-protein kinase MARK2
		21.5373	22.7548	23.6168	22.3623	21.8664	22.3581	21.9779	22.5548	23.0916	22.5748	22.6134	22.5221	22.3449	22.3776						3	3	3	NaN	NaN	NaN	NaN	0	NaN	200930000	23	0.476578	0.221805	0.953972	0.777682	0.152936	0.29801	0.0601758	0.570632	2.41921	0.731662	-0.192135	-0.362693	0.301593	-0.225562	-1.15151	Q05816	Q05816	Fatty acid-binding protein, epidermal
		22.8004	23.0059	22.7616	22.8733	22.4259	22.4837	22.3715	22.8666	22.9681	22.7839	22.809	22.7441	23.2771	22.7183						6	6	6	NaN	NaN	NaN	NaN	0	NaN	215830000	85	0.119847	0.169474	0.108582	0.761668	-0.0528933	-0.320335	0.0751025	0.316712	2.24119	0.936869	0.00664902	0.0832686	0.121748	-0.376255	-1.86142	Q05CL8	Q05CL8	La-related protein 7
		22.8106	22.0831	22.0509	22.614	22.1993	22.0883	21.7719	22.3198	21.9619	22.3349	22.1066	22.3792	22.416	21.7193						4	4	4	NaN	NaN	NaN	NaN	0	NaN	153310000	35	0.609061	0.383312	0.34955	0.492198	0.218163	0.740652	0.820955	0.0396264	0.238507	0.342076	0.255212	1.04933	0.757406	-0.0766748	-0.326309	Q05D44	Q05D44	Eukaryotic translation initiation factor 5B
		22.775	22.1314	22.4275	22.0656	21.3759	21.1684	20.9854	19.0552	21.406	22.1867	22.0173	22.2247	19.6115	20.9215						4	4	4	NaN	NaN	NaN	NaN	0	NaN	114650000	25	0.829605	0.013817	0.440174	0.0822626	1.43067	2.16885	0.125043	1.22377	1.84065	0.142476	0.479881	1.73928	0.772652	-0.27298	-0.305003	Q06138	Q06138	Calcium-binding protein 39
		21.6917	21.6508	21.5222	17.7436	21.729	21.9546	21.6972	21.7204	22.4489	21.8051	21.8356	21.6494	21.9789	21.8994						3	3	3	NaN	NaN	NaN	NaN	0	NaN	112050000	62	0.243651	0.35355	0.287427	0.348363	-1.1905	-1.0344	0.236466	0.254598	1.34481	0.288718	-1.37782	-1.18652	0.565413	-0.0672706	-0.615081	Q06180-2;Q06180	Q06180-2;Q06180	Tyrosine-protein phosphatase non-receptor type 2
		26.199	26.116	26.5843	26.7689	26.29	26.3934	26.344	25.846	25.0796	26.5195	26.6517	26.4775	26.6544	26.6179						3	3	3	NaN	NaN	NaN	NaN	0	NaN	2606600000	140	0.949585	0.684145	0.180653	0.420271	-0.166208	-0.877707	0.7751	-0.134748	-0.301597	0.500661	0.333458	0.725512	0.0660016	-0.364918	-2.3446	Q06185	Q06185	ATP synthase subunit e, mitochondrial
		25.4711	25.3179	25.6259	25.0225	25.1507	25.4212	25.5396	25.5665	25.6962	25.4719	25.9012	25.2539	25.4153	25.5061						13	13	13	NaN	NaN	NaN	NaN	0	NaN	1401700000	167	0.207284	0.420306	0.141662	0.851462	-0.0323938	-0.197166	0.137468	0.270283	1.76706	0.132876	-0.330425	-1.79343	0.837239	0.0277483	0.216385	Q07076	Q07076	Annexin A7
		24.0101	23.8955	23.8116	23.7363	23.827	23.8838	24.2207	24.0949	23.74	23.9567	24.0511	23.7487	24.2507	24.1561						7	7	7	NaN	NaN	NaN	NaN	0	NaN	485650000	102	0.632007	0.183028	0.971196	0.254391	-0.188433	-1.28719	0.525952	-0.0906951	-0.681297	0.634179	-0.0525316	-0.506294	0.799175	-0.0452061	-0.268315	Q07417	Q07417	Short-chain specific acyl-CoA dehydrogenase, mitochondrial
		21.6537	21.7027	22.2209	21.9052	21.2684	21.8466	22.2018	21.6834	22.0243	21.7117	22.1909	22.0077	22.262	22.2939						3	3	3	NaN	NaN	NaN	NaN	0	NaN	126980000	60	0.109125	0.888012	0.306246	0.12139	-0.317255	-1.86372	0.421028	0.225583	0.876174	0.608783	-0.105019	-0.54561	0.129311	-0.437819	-1.81456	Q07797	Q07797	Galectin-3-binding protein
		23.9417	23.4591	24.5142	23.7162	23.9501	24.3331	23.8454	25.2185	24.3705	24.297	24.1877	23.4107	24.8843	23.9634						5	5	2	NaN	NaN	NaN	NaN	0	NaN	607450000	90	0.832092	0.59091	0.305797	0.706646	-0.178312	-0.398593	0.894847	-0.0517058	-0.139037	0.220886	-0.377241	-1.39829	0.647325	0.250635	0.486291	Q08024-4;Q08024;Q08024-3	Q08024-4;Q08024;Q08024-3	Core-binding factor subunit beta
		22.3814	19.2691	22.4623	22.4132	22.4584	22.2937	22.5929	20.3091	22.7424	22.5346	22.6587	22.3874	21.1015	22.8008						4	1	1	NaN	NaN	NaN	NaN	NaN	NaN	137930000	5	0.345311	0.904004	0.507427	0.669198	-0.465086	-0.453491	0.303961	0.731684	1.14521	0.326987	-1.01371	-1.08613	0.820926	-0.18306	-0.238546	Q08024-2	Q08024-2	Core-binding factor subunit beta
		26.5159	26.4997	27.0443	25.8836	26.2954	26.4284	26.5501	27.3637	25.8782	26.4235	26.2164	26.3005	26.7725	25.7712						10	10	9	NaN	NaN	NaN	NaN	0	NaN	3058800000	191	0.185235	0.557888	0.896551	0.604897	0.204484	0.551711	0.181886	-0.486698	-1.54977	0.359614	0.313197	1.00824	0.357969	0.377985	1.01202	Q08093	Q08093	Calponin-2
		21.3955	22.0055	22.6352	21.7168	21.9776	22.8595	22.3583	22.7197	22.4258	22.0487	22.0402	21.9664	22.6311	21.9216						6	6	6	NaN	NaN	NaN	NaN	0	NaN	157020000	34	0.874573	0.192339	0.255954	0.549714	-0.234777	-0.64105	0.285371	-0.307226	-1.19585	0.510602	-0.233307	-0.707952	0.358571	0.305756	1.01063	Q08288	Q08288	Cell growth-regulating nucleolar protein
		21.7905	21.6904	21.4028	21.3904	21.7377	21.5529	21.8448	21.9837	21.4244	19.9606	21.4103	21.3485	21.8138	21.5403						2	2	2	NaN	NaN	NaN	NaN	0	NaN	89276000	22	0.0894109	0.108898	0.369191	0.995371	0.0010047	0.00609722	0.0996522	-0.847988	-2.01778	0.193133	0.636741	1.5031	0.231605	0.212253	1.36113	Q08481-4;Q08481-2;Q08481-3;Q08481	Q08481-4;Q08481-2;Q08481-3;Q08481	Platelet endothelial cell adhesion molecule
		25.1122	25.2601	24.7154	24.7449	24.451	24.8116	25.7725	24.3334	25.0702	25.0616	24.0755	24.7308	23.7845	24.6135						7	7	7	NaN	NaN	NaN	NaN	0	NaN	1014100000	59	0.246825	0.444619	0.672725	0.106569	0.581903	1.96526	0.831572	-0.106386	-0.224068	0.516991	0.222411	0.696791	0.357242	0.465878	1.01369	Q08642	Q08642	Protein-arginine deiminase type-2
		26.4536	26.0452	25.7776	26.4648	26.3398	26.1327	26.0633	26.3271	25.9509	25.9306	25.9027	26.3896	26.3852	26.3953						15	15	15	NaN	NaN	NaN	NaN	0	NaN	2204600000	293	0.707306	0.0701456	0.0721653	0.348531	-0.204721	-1.034	0.017958	-0.287677	-3.46435	0.25119	0.257258	1.2972	0.0876016	-0.174302	-2.11913	Q08943;Q08943-2	Q08943;Q08943-2	FACT complex subunit SSRP1
		24.5375	24.6194	24.5898	24.8729	24.3106	24.8961	24.9808	24.7206	24.9866	25.1231	24.9656	24.5775	25.4614	25.1849						11	11	11	NaN	NaN	NaN	NaN	0	NaN	850990000	180	0.0363231	0.680231	0.940904	0.134919	-0.419702	-1.78159	0.160637	0.298106	1.64622	0.0126514	-0.370198	-3.79823	0.270538	-0.34761	-1.2384	Q09200	Q09200	Beta-1,4 N-acetylgalactosaminyltransferase 1
		23.405	23.1713	23.6656	23.1097	23.7369	23.9332	23.1931	23.5695	23.7063	23.3826	23.1552	23.3106	24.0383	22.8884						8	8	8	NaN	NaN	NaN	NaN	0	NaN	362250000	65	0.76792	0.447267	0.50286	0.824042	-0.0745794	-0.234303	0.43666	-0.193481	-0.845012	0.7176	-0.0768123	-0.382801	0.586455	0.195714	0.580983	Q0P678;Q0P678-2	Q0P678;Q0P678-2	Zinc finger CCCH domain-containing protein 18
		21.6566	21.4897	22.0638	21.1908	21.6891	21.9857	22.1144	21.3046	21.3211	21.2715	21.2062	21.3237	21.0502	21.3025						3	3	3	NaN	NaN	NaN	NaN	0	NaN	99866000	29	0.0181961	0.610096	0.509512	0.160634	0.374775	1.64623	0.0645052	-0.507211	-2.36307	0.184833	0.333985	1.53727	0.0591014	0.548	2.43383	Q0VGB7	Q0VGB7	Serine/threonine-protein phosphatase 4 regulatory subunit 2
		24.3468	24.6897	24.4616	24.1216	24.2508	24.1634	24.7028	24.6722	24.4734	24.5603	24.3538	24.1533	24.2964	24.3807						12	12	12	NaN	NaN	NaN	NaN	0	NaN	645920000	162	0.633155	0.636155	0.343636	0.433731	0.128127	0.850785	0.933364	0.0152094	0.0879059	0.714608	-0.0575506	-0.387103	0.373935	0.170468	0.975897	Q11011	Q11011	Puromycin-sensitive aminopeptidase
		23.268	23.3957	23.2932	22.8996	23.5824	22.6659	23.2784	22.9172	22.97	22.8164	22.9901	23.1325	23.0059	23.4869						7	7	7	NaN	NaN	NaN	NaN	0	NaN	288630000	69	0.537657	0.683133	0.226515	0.975365	0.0057106	0.0324553	0.478796	-0.185506	-0.765015	0.0876417	0.288655	2.11877	0.729922	-0.0974388	-0.365171	Q11136	Q11136	Xaa-Pro dipeptidase
		19.5854	20.3702	20.7085	20.3757	20.3302	20.6674	20.0028	21.6643	20.8955	19.0969	20.5828	20.0141	21.4264	20.4259						2	2	2	NaN	NaN	NaN	NaN	NaN	NaN	43808000	11	0.887575	0.302175	0.975648	0.457543	-0.36223	-0.804681	0.484959	-0.474456	-0.753751	0.904939	0.0682232	0.125604	0.939469	0.044003	0.0798296	Q18PI6-3;Q18PI6;Q18PI6-2	Q18PI6-3;Q18PI6;Q18PI6-2	SLAM family member 5
		24.3859	24.2613	24.1601	23.8959	24.1746	24.3404	24.1961	24.5844	24.3113	24.4359	24.2423	24.3274	24.0687	24.0069						14	14	14	NaN	NaN	NaN	NaN	0	NaN	606920000	183	0.856526	0.992998	0.102806	0.790756	0.0414387	0.279911	0.962832	0.00593821	0.0489797	0.29579	-0.154033	-1.16712	0.229605	0.189534	1.36794	Q1HFZ0;Q1HFZ0-2	Q1HFZ0;Q1HFZ0-2	tRNA (cytosine(34)-C(5))-methyltransferase
		23.9424	23.5124	23.4641	23.7679	23.7109	23.5742	23.197	22.1873	23.6281	22.7387	22.903	23.8412	22.2758	23.3656						6	6	5	NaN	NaN	NaN	NaN	0	NaN	331640000	54	0.366095	0.421404	0.376289	0.267729	0.510836	1.24669	0.874844	-0.0774274	-0.165755	0.0790048	0.581803	2.20089	0.991278	0.00646067	0.011489	Q91VK1;Q2L4X1	Q91VK1;Q2L4X1	Basic leucine zipper and W2 domain-containing protein 2
		21.2572	21.0593	20.0947	18.6712	21.143	21.2323	21.3047	21.1183	21.0731	21.4673	19.9761	21.1969	21.1896	20.9577						2	2	2	NaN	NaN	NaN	NaN	0	NaN	64092000	23	0.557409	0.130624	0.431364	0.282871	-0.844149	-1.20287	0.382213	-0.360725	-0.957666	0.505269	-0.56824	-0.717342	0.353282	0.0848157	1.02287	Q2NL51	Q2NL51	Glycogen synthase kinase-3 alpha
		21.4132	21.3557	21.4782	21.9236	21.9356	22.2676	21.8158	22.0894	22.0273	21.555	22.167	21.4642	22.4506	22.0412						4	4	4	NaN	NaN	NaN	NaN	0	NaN	116850000	29	0.356864	0.101865	0.254515	0.180016	-0.442662	-1.5578	0.591808	-0.110677	-0.57243	0.146835	-0.373738	-1.7159	0.881356	0.0417535	0.157043	Q2TPA8	Q2TPA8	Hydroxysteroid dehydrogenase-like protein 2
		22.8287	22.9927	23.0545	23.1665	22.8808	22.8037	22.3759	22.0933	23.1769	22.4396	22.5563	23.0762	22.7251	23.0209						3	3	3	NaN	NaN	NaN	NaN	0	NaN	221840000	60	0.721489	0.284366	0.0544528	0.59634	0.0698563	0.565225	0.551322	0.185815	0.638369	0.22862	0.286354	1.37131	0.151022	-0.402313	-1.6941	Q2VPQ9;Q2VPQ9-2	Q2VPQ9;Q2VPQ9-2	Chromatin modification-related protein MEAF6
		21.4733	20.3065	20.1641	19.1518	17.5349	18.8515	20.8918	21.022	20.6477	20.527	18.4997	19.4107	20.8122	18.2411						3	3	3	NaN	NaN	NaN	NaN	0	NaN	23402000	10	0.748904	0.436537	0.840112	0.391575	0.785941	0.937427	0.795002	0.316423	0.274058	0.656666	0.38249	0.472213	0.943814	0.0870285	0.0740864	Q3B7Z2;Q3B7Z2-2	Q3B7Z2	Oxysterol-binding protein 1
		22.2645	22.5655	22.3893	22.0171	22.5423	21.9556	22.2861	22.4971	21.9754	22.2148	22.2649	22.1348	21.674	21.859						2	2	2	NaN	NaN	NaN	NaN	0	NaN	154720000	37	0.0394647	0.408757	0.296767	0.0632697	0.419804	2.37866	0.379669	-0.168594	-0.963234	0.357954	0.157388	1.01205	0.0768561	0.431009	2.22281	Q3SXD3	Q3SXD3	HD domain-containing protein 2
		27.0723	26.9677	26.9214	26.7159	26.911	26.8478	26.9885	27.2665	26.8741	26.7154	26.5614	26.8377	27.0056	26.7398						29	29	29	NaN	NaN	NaN	NaN	0	NaN	3744100000	448	0.0731957	0.226697	0.734828	0.618051	0.0583	0.531155	0.0834096	-0.2865	-2.15789	0.142414	0.202401	1.73962	0.313248	0.142399	1.12093	Q3TBD2;Q3TBD2-2;Q3TBD2-3;Q3TBD2-4	Q3TBD2;Q3TBD2-2;Q3TBD2-3;Q3TBD2-4	Minor histocompatibility protein HA-1
		24.7312	24.4418	23.766	24.8707	24.5029	24.1207	24.387	23.8873	24.6662	24.4158	23.9198	24.5302	24.2316	24.5698						6	6	6	NaN	NaN	NaN	NaN	0	NaN	648170000	123	0.801472	0.676362	0.40758	0.978628	0.0085597	0.0281543	0.674398	0.109482	0.445777	0.744343	0.118474	0.344704	0.291402	-0.219397	-1.17911	Q3TBT3;Q3TBT3-2;Q3TBT3-3	Q3TBT3;Q3TBT3-2;Q3TBT3-3	Stimulator of interferon genes protein
		21.0294	20.7162	20.7111	20.9632	20.6279	20.7119	20.7864	20.8603	20.9692	20.8144	20.5446	20.8257	21.2235	20.9022						2	2	2	NaN	NaN	NaN	NaN	NaN	NaN	50925000	5	0.41233	0.773321	0.118332	0.403888	-0.128794	-0.911392	0.81492	0.0294553	0.24674	0.603985	0.0789078	0.553145	0.100183	-0.237157	-2.01361	Q3TC33;Q3TC33-2	Q3TC33;Q3TC33-2	Coiled-coil domain-containing protein 127
[truncated: 1,646 more rows]
[truncated: 1 more columns]

## Sheet: Legend
Project	ThGA
Exp Name	ThGA_PC12_CL
Link	2023-03-23
